# Supplementary material for: Cobalt-catalysed unactivated C(sp3)–H amination: two-state reactivity and multi-reference electronic character
Source: Royal Society of Chemistry journal article supplement (doi:10.1039/c9cy00239a), 2019-01-01
Supplement: c9cy00239a1.pdf [file c9cy00239a1.pdf]

## *Electronic Supplementary Information*

### **Cobalt-Catalysed Unactivated C(sp<sup>3</sup>)-H Amination: Two-State Reactivity and Multi-reference Electronic Character**

Yang Yu, Gen Luo,\* Jimin Yang, and Yi Luo\*

*State Key Laboratory of Fine Chemicals, School of Chemical Engineering, Dalian University of Technology, Dalian 116024, China.*

E-mails: luogen@dlut.edu.cn (G.L.); luoyi@dlut.edu.cn (Y.L.).

#### **Contents**

|                                                                                                                                                                                                                                                                                     |    |
|-------------------------------------------------------------------------------------------------------------------------------------------------------------------------------------------------------------------------------------------------------------------------------------|----|
| <b>Fig. S1</b> The whole calculated free energy profiles for C(sp <sup>3</sup> )-H activation by Co(III) catalyst via external base metalation/deprotonation (energies in kcal mol <sup>-1</sup> ). The left-superscript denotes the spin state of corresponding species.....       | S2 |
| <b>Fig. S2</b> The whole calculated free energy profiles (kcal mol <sup>-1</sup> ) for C(sp <sup>3</sup> )-H activation by Co(III) catalyst via intramolecular concert-metalation deprotonation (CMD). The left-superscript denotes the spin state of corresponding species.....    | S2 |
| <b>Fig. S3</b> The whole calculated free energy profiles for C-N bond formation by Co(III) catalyst (energies in kcal mol <sup>-1</sup> ). The left-superscript denotes the spin state of corresponding species.....                                                                | S3 |
| <b>Fig. S4</b> The whole calculated free energy profiles (energies in kcal mol <sup>-1</sup> ) for generation of Co nitrenoid intermediates using (a) phenyl-1,4,2-dioxazol-5-one, (b) TsN <sub>3</sub> . The left-superscript denotes the spin state of corresponding species..... | S4 |
| <b>Fig. S5</b> Active space orbitals of <sup>oss</sup> 8 calculated at the CASSCF(12,12) level of theory, the corresponding occupation numbers are given below each molecular orbital.....                                                                                          | S4 |
| <b>Fig. S6</b> Spin density plot for the <sup>3</sup> 8.....                                                                                                                                                                                                                        | S5 |
| <b>Fig. S7</b> Calculated free energy profiles for C(sp <sup>3</sup> )-H activation catalyzed by Tp ligated Co(III) complex via external base metalation/deprotonation (energies in kcal mol <sup>-1</sup> , Tp = hydridotris(pyrazolyl)borate).....                                | S5 |
| <b>Table S1</b> Relative free energies <sup>a</sup> for <sup>1</sup> 1, <sup>3</sup> 1, and <sup>5</sup> 1 from different DFT functionals and DLPNO-CCSD(T) method (kcal mol <sup>-1</sup> ). .....                                                                                 | S6 |
| <b>Table S2</b> Free energy differences (kcal mol <sup>-1</sup> ) of several potential Co(III) active species between singlet, triplet, and quintet states (the corresponding singlet states are taken as reference points).....                                                    | S6 |
| <b>Table S3</b> Main electronic configurations ( $\Psi_i$ ), natural orbitals ( $\psi_i$ ), and the weight of contributions for the CASSCF(12,12) of <sup>oss</sup> 8.....                                                                                                          | S6 |

Cartesian coordinates and electronic energies (a.u., calculated at the level of B3LYP–D3/BSII(SMD,DCE))/B3LYP–D3/BSI) for all of the stationary points and the imaginary frequencies ( $\text{cm}^{-1}$ ) of transition states .....S7

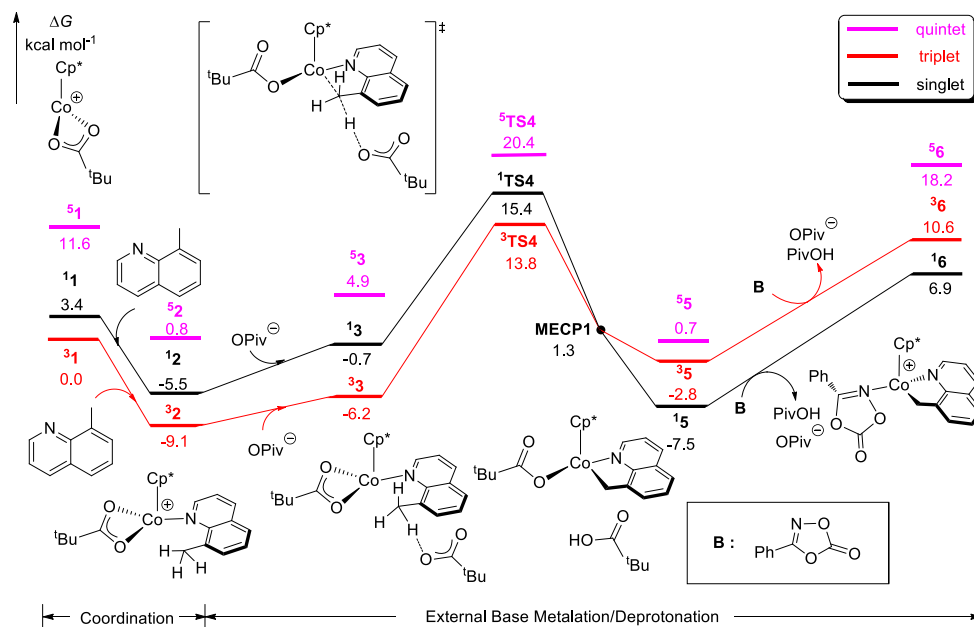

**Fig. S1** The whole calculated free energy profiles for C(sp<sup>3</sup>)–H activation by Co(III) catalyst via external base metalation/deprotonation (energies in kcal mol<sup>-1</sup>). The left-superscript denotes the spin state of corresponding species.

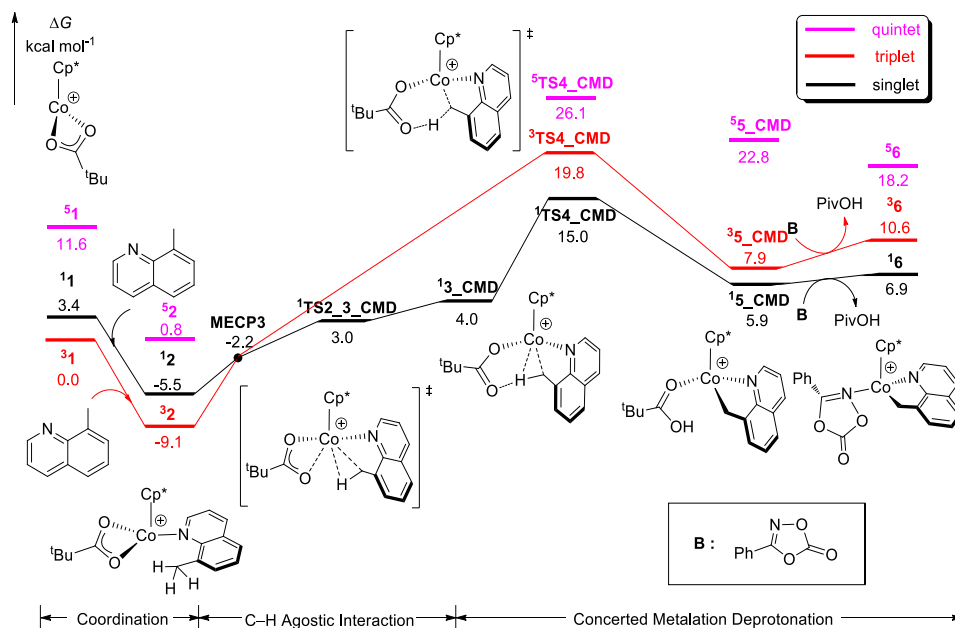

**Fig. S2** The whole calculated free energy profiles (kcal mol<sup>-1</sup>) for C(sp<sup>3</sup>)–H activation by Co(III) catalyst via intramolecular concert-metalation deprotonation (CMD). The left-superscript denotes the spin state of corresponding species.

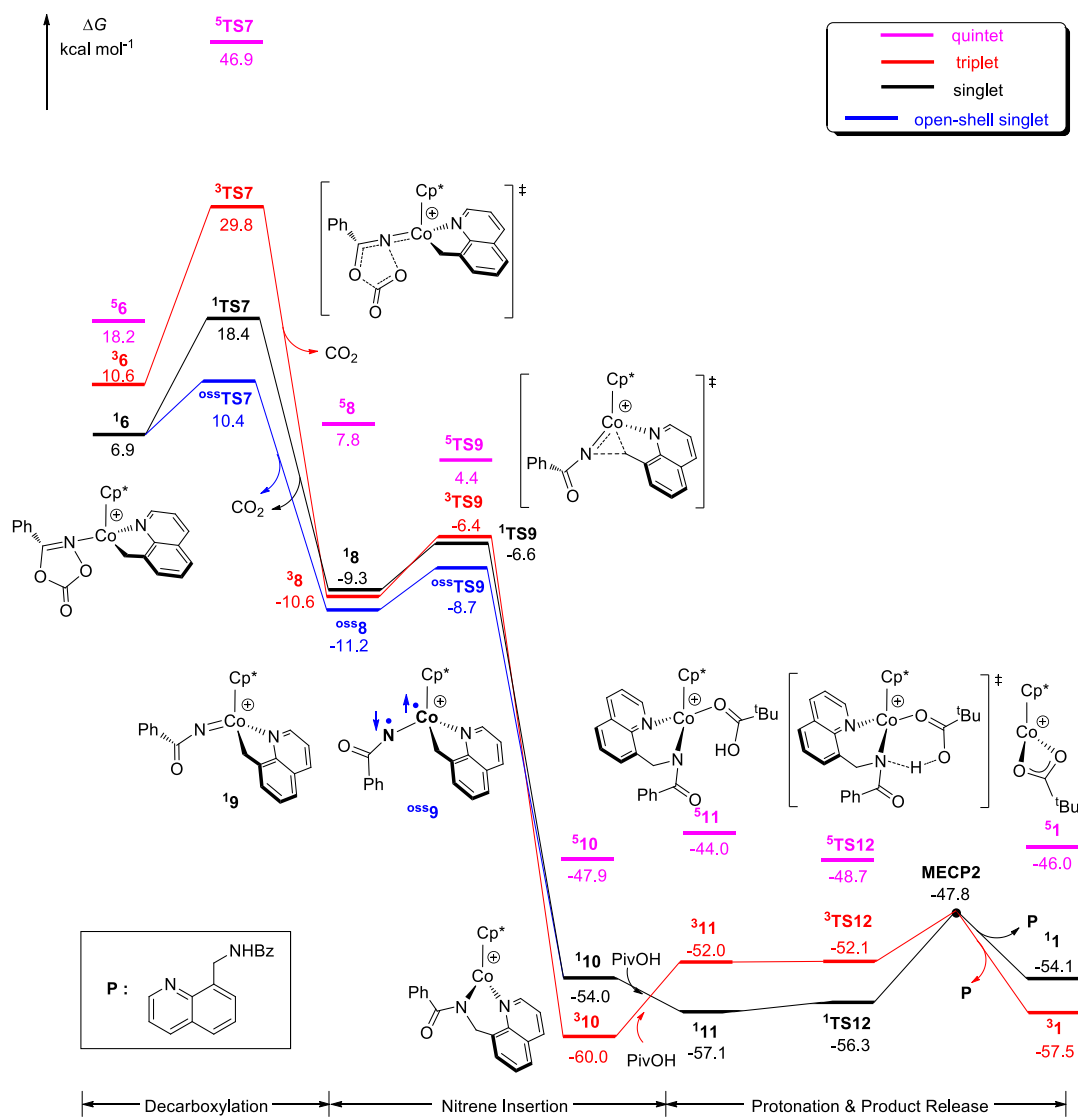

**Fig. S3** The whole calculated free energy profiles for C–N bond formation by Co(III) catalyst (energies in kcal mol<sup>-1</sup>). The left-superscript denotes the spin state of corresponding species.

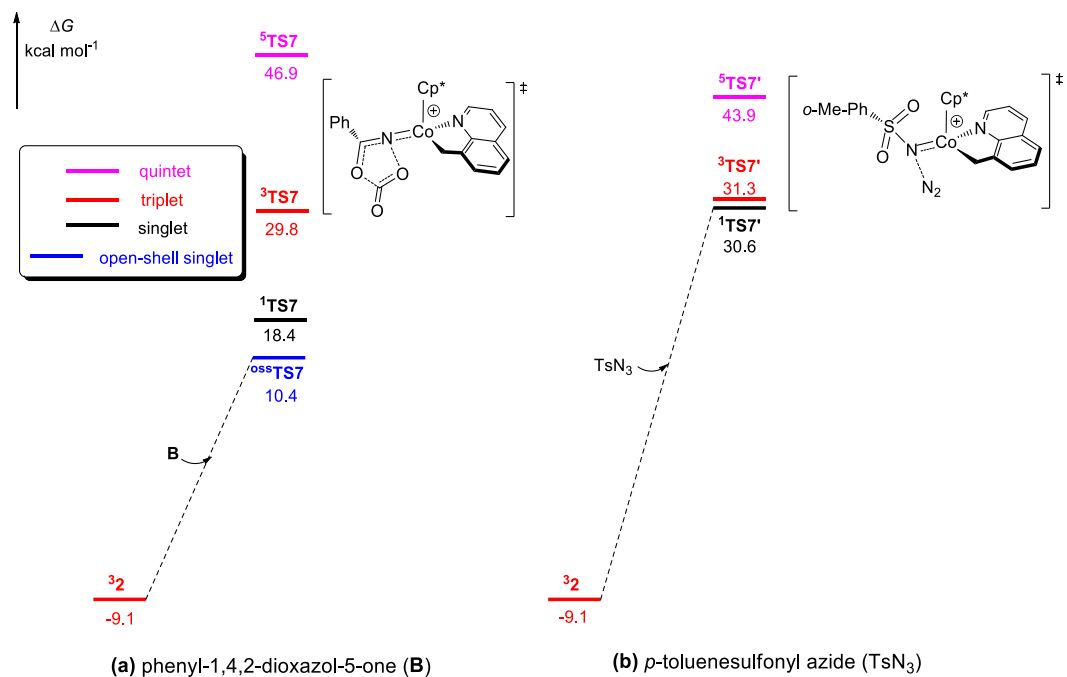

**Fig. S4** The whole calculated free energy profiles (energies in kcal mol<sup>-1</sup>) for generation of Co nitrenoid intermediates using (a) phenyl-1,4,2-dioxazol-5-one, (b) TsN<sub>3</sub>. The left-superscript denotes the spin state of corresponding species.

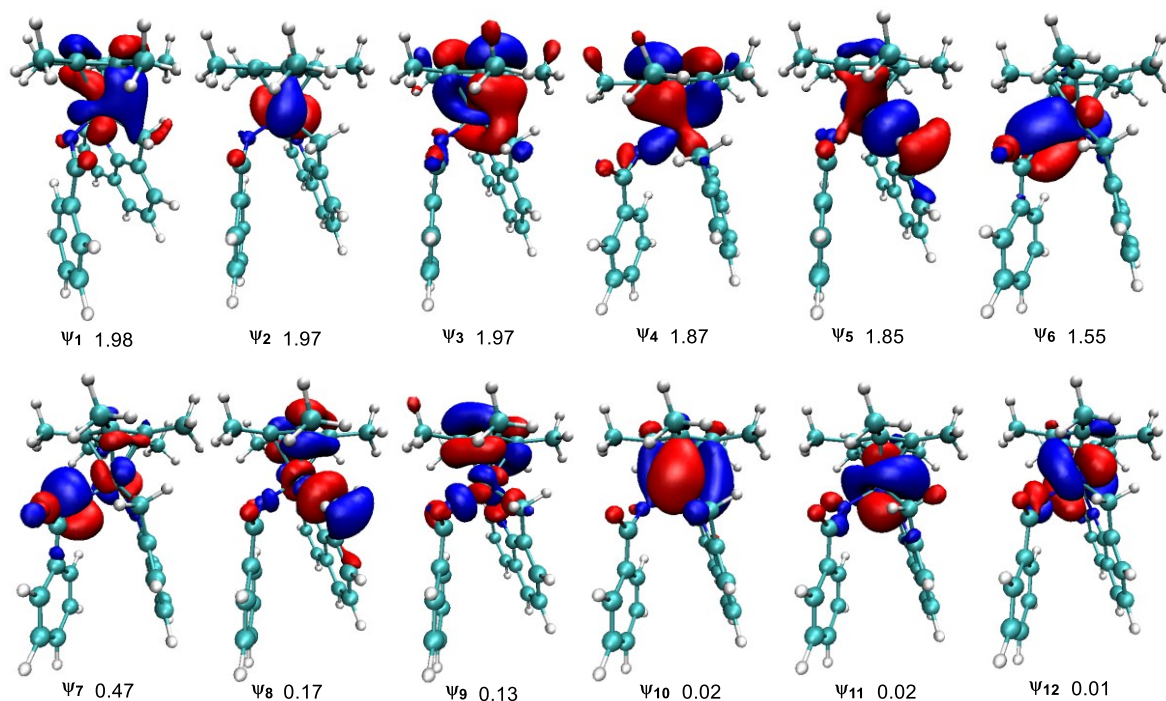

**Fig. S5** Active space orbitals of <sup>1oss8</sup> calculated at the CASSCF(12,12) level of theory, the corresponding occupation numbers are given below each molecular orbital.

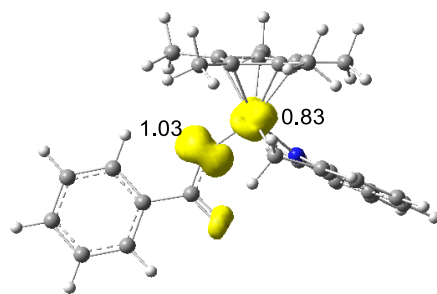

**Fig. S6** Spin density plot for the  $^{38}$ .

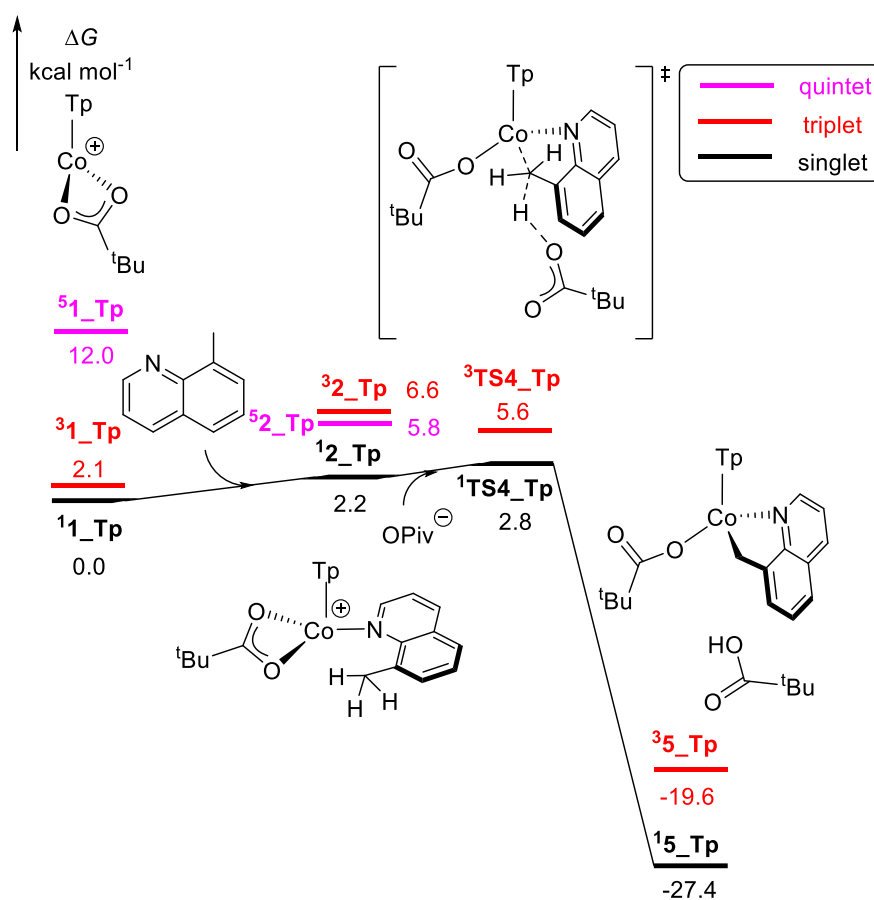

**Fig. S7** Calculated free energy profiles for C(sp<sup>3</sup>)-H activation catalyzed by Tp ligated Co(III) complex via external base metalation/deprotonation (energies in kcal mol<sup>-1</sup>, Tp = hydridotris(pyrazolyl)borate).

**Table S1** Relative free energies of **1**<sup>1</sup>, **3**<sup>1</sup>, and **5**<sup>1</sup> calculated with different DFT functionals and DLPNO–CCSD(T) method (kcal mol<sup>-1</sup>) on the basis of B3LYP-D3/BSI geometries.

|                       | B3LYP–D3 | B3P86 | ωB97XD | PBE0 | M06  | CCSD(T) <sup>a</sup> |
|-----------------------|----------|-------|--------|------|------|----------------------|
| <b>1</b> <sup>1</sup> | 3.4      | 2.2   | 3.5    | 8    | -1.5 | 3.5                  |
| <b>3</b> <sup>1</sup> | 0        | 0     | 0      | 0    | 0    | 0                    |
| <b>5</b> <sup>1</sup> | 11.6     | 13.3  | 36.1   | 10.2 | 10.5 | 18.1                 |

<sup>a</sup>The DLPNO–CCSD(T) calculations were carried out using ORCA 4.0 software with def2–TZVP basis set.

Except for the M06 functional, all of the other methods predict the triplet ground state of **1**.

**Table S2** Free energy differences (kcal mol<sup>-1</sup>) of several potential Co(III) active species between singlet, triplet, and quintet states (the corresponding singlet states are taken as reference points).

|                                         | <i>G</i> (singlet) | <i>G</i> (triplet) | <i>G</i> (quintet) |
|-----------------------------------------|--------------------|--------------------|--------------------|
| [Cp*CoI <sub>2</sub> ] <sub>2</sub>     | 0.0                | -7.6               | -2.5               |
| Cp*Co(OPiv) <sub>2</sub>                | 0.0                | -4.4               | 0.9                |
| [Cp*Co(OPiv)] <sup>+</sup>              | 0.0                | -3.4               | 8.1                |
| Cp*Co(OPiv)(SbF <sub>6</sub> )          | 0.0                | 0.4                | 9.1                |
| [Cp*Co(SbF <sub>6</sub> )] <sup>+</sup> | 0.0                | -11.6              | -3.6               |

**Table S3** Main electronic configurations (**Ψ**<sub>*i*</sub>), natural orbitals (**ψ**<sub>*i*</sub>), and the weight of contributions for the CASSCF(12,12) of <sup>oss</sup>**8**.

|                       | Configuration state function                                                                                                                                                                                                                                                                                                                                                                                                                                                           | Weight |
|-----------------------|----------------------------------------------------------------------------------------------------------------------------------------------------------------------------------------------------------------------------------------------------------------------------------------------------------------------------------------------------------------------------------------------------------------------------------------------------------------------------------------|--------|
| <b>Ψ</b> <sub>1</sub> | ( <b>ψ</b> <sub>1</sub> ) <sup>2</sup> ( <b>ψ</b> <sub>2</sub> ) <sup>2</sup> ( <b>ψ</b> <sub>3</sub> ) <sup>2</sup> ( <b>ψ</b> <sub>4</sub> ) <sup>2</sup> ( <b>ψ</b> <sub>5</sub> ) <sup>2</sup> ( <b>ψ</b> <sub>6</sub> ) <sup>2</sup> ( <b>ψ</b> <sub>7</sub> ) <sup>0</sup> ( <b>ψ</b> <sub>8</sub> ) <sup>0</sup> ( <b>ψ</b> <sub>9</sub> ) <sup>0</sup> ( <b>ψ</b> <sub>10</sub> ) <sup>0</sup> ( <b>ψ</b> <sub>11</sub> ) <sup>0</sup> ( <b>ψ</b> <sub>12</sub> ) <sup>0</sup> | 0.64   |
| <b>Ψ</b> <sub>2</sub> | ( <b>ψ</b> <sub>1</sub> ) <sup>2</sup> ( <b>ψ</b> <sub>2</sub> ) <sup>2</sup> ( <b>ψ</b> <sub>3</sub> ) <sup>2</sup> ( <b>ψ</b> <sub>4</sub> ) <sup>2</sup> ( <b>ψ</b> <sub>5</sub> ) <sup>2</sup> ( <b>ψ</b> <sub>6</sub> ) <sup>0</sup> ( <b>ψ</b> <sub>7</sub> ) <sup>2</sup> ( <b>ψ</b> <sub>8</sub> ) <sup>0</sup> ( <b>ψ</b> <sub>9</sub> ) <sup>0</sup> ( <b>ψ</b> <sub>10</sub> ) <sup>0</sup> ( <b>ψ</b> <sub>11</sub> ) <sup>0</sup> ( <b>ψ</b> <sub>12</sub> ) <sup>0</sup> | 0.17   |
| <b>Ψ</b> <sub>3</sub> | ( <b>ψ</b> <sub>1</sub> ) <sup>2</sup> ( <b>ψ</b> <sub>2</sub> ) <sup>2</sup> ( <b>ψ</b> <sub>3</sub> ) <sup>2</sup> ( <b>ψ</b> <sub>4</sub> ) <sup>2</sup> ( <b>ψ</b> <sub>5</sub> ) <sup>0</sup> ( <b>ψ</b> <sub>6</sub> ) <sup>2</sup> ( <b>ψ</b> <sub>7</sub> ) <sup>0</sup> ( <b>ψ</b> <sub>8</sub> ) <sup>2</sup> ( <b>ψ</b> <sub>9</sub> ) <sup>0</sup> ( <b>ψ</b> <sub>10</sub> ) <sup>0</sup> ( <b>ψ</b> <sub>11</sub> ) <sup>0</sup> ( <b>ψ</b> <sub>12</sub> ) <sup>0</sup> | 0.03   |
| <b>Ψ</b> <sub>4</sub> | ( <b>ψ</b> <sub>1</sub> ) <sup>2</sup> ( <b>ψ</b> <sub>2</sub> ) <sup>2</sup> ( <b>ψ</b> <sub>3</sub> ) <sup>2</sup> ( <b>ψ</b> <sub>4</sub> ) <sup>0</sup> ( <b>ψ</b> <sub>5</sub> ) <sup>2</sup> ( <b>ψ</b> <sub>6</sub> ) <sup>2</sup> ( <b>ψ</b> <sub>7</sub> ) <sup>0</sup> ( <b>ψ</b> <sub>8</sub> ) <sup>0</sup> ( <b>ψ</b> <sub>9</sub> ) <sup>2</sup> ( <b>ψ</b> <sub>10</sub> ) <sup>0</sup> ( <b>ψ</b> <sub>11</sub> ) <sup>0</sup> ( <b>ψ</b> <sub>12</sub> ) <sup>0</sup> | 0.02   |

**Cartesian coordinates and electronic energies (a.u., calculated at the level of B3LYP–D3/BSII(SMD,DCE)//B3LYP–D3/BSI) for all of the stationary points and the imaginary frequencies (cm<sup>-1</sup>) of transition states**

<sup>1</sup>[Cp\*CoI<sub>2</sub>]<sub>2</sub>, -4737.70347036

|   |             |             |             |
|---|-------------|-------------|-------------|
| C | -2.23437500 | 2.32280400  | 0.70773100  |
| C | -3.23514200 | 1.37769800  | 1.15742900  |
| C | -3.91406900 | 0.88091600  | 0.00019900  |
| C | -3.23541100 | 1.37737400  | -1.15734700 |
| C | -2.23457300 | 2.32263400  | -0.70814600 |
| C | 2.23452400  | -2.32265500 | 0.70810700  |
| C | 3.23535800  | -1.37742600 | 1.15738100  |
| C | 3.91406500  | -0.88092900 | -0.00011700 |
| C | 3.23517900  | -1.37766500 | -1.15739500 |
| C | 2.23439200  | -2.32278400 | -0.70777100 |
| C | 1.38219000  | -3.21702100 | -1.55296500 |
| H | 1.76605200  | -4.24340900 | -1.49248400 |
| H | 0.34491000  | -3.21814500 | -1.20762100 |
| H | 1.38525200  | -2.91171300 | -2.59953200 |
| C | 1.38249000  | -3.21675900 | 1.55361200  |
| H | 0.34518100  | -3.21808300 | 1.20835800  |
| H | 1.76646100  | -4.24312000 | 1.49335400  |
| H | 1.38561900  | -2.91118900 | 2.60010200  |
| C | 3.59650300  | -1.06257000 | 2.57623400  |
| H | 2.76145500  | -1.26566200 | 3.24944400  |
| H | 4.45374800  | -1.66293000 | 2.90510700  |
| H | 3.85735400  | -0.00629700 | 2.67898100  |
| C | 5.16365500  | -0.06120800 | -0.00031600 |
| H | 5.22974000  | 0.57720400  | 0.88104900  |
| H | 6.02407100  | -0.74419300 | -0.00041700 |
| H | 5.22949300  | 0.57714700  | -0.88174200 |
| C | 3.59612700  | -1.06311200 | -2.57636500 |
| H | 3.85687000  | -0.00683900 | -2.67939700 |
| H | 4.45339700  | -1.66346600 | -2.90518300 |
| H | 2.76102800  | -1.26645000 | -3.24943700 |
| C | -3.59660500 | 1.06246000  | -2.57617400 |
| H | -4.45385900 | 1.66280600  | -2.90504700 |
| H | -2.76157700 | 1.26552200  | -3.24941900 |
| H | -3.85745800 | 0.00618200  | -2.67886700 |
| C | -5.16365500 | 0.06118600  | 0.00048600  |
| H | -6.02407500 | 0.74416500  | 0.00065100  |
| H | -5.22979800 | -0.57722500 | -0.88087600 |
| H | -5.22942400 | -0.57717200 | 0.88191500  |

|    |             |             |             |
|----|-------------|-------------|-------------|
| C  | -3.59603800 | 1.06320000  | 2.57642500  |
| H  | -4.45330900 | 1.66355400  | 2.90524200  |
| H  | -3.85676400 | 0.00692800  | 2.67951100  |
| H  | -2.76092300 | 1.26658100  | 3.24946300  |
| C  | -1.38213900 | 3.21707200  | 1.55286100  |
| H  | -1.76598500 | 4.24346300  | 1.49234000  |
| H  | -1.38518100 | 2.91181400  | 2.59944200  |
| H  | -0.34486700 | 3.21816300  | 1.20749400  |
| C  | -1.38259000 | 3.21672500  | -1.55371600 |
| H  | -1.76659500 | 4.24307500  | -1.49349400 |
| H  | -0.34527300 | 3.21810000  | -1.20848900 |
| H  | -1.38573900 | 2.91110800  | -2.60019300 |
| I  | -0.00000200 | -0.00004400 | -1.89447100 |
| I  | 0.00000200  | 0.00005500  | 1.89448500  |
| I  | 2.55132400  | 2.21541000  | -0.00004600 |
| I  | -2.55130700 | -2.21541300 | 0.00000600  |
| Co | -1.84975000 | 0.32860800  | -0.00000300 |
| Co | 1.84974900  | -0.32860700 | 0.00001100  |

<sup>3</sup>[Cp\*CoI<sub>2</sub>]<sub>2</sub>, -4737.70835508

|   |             |             |             |
|---|-------------|-------------|-------------|
| C | 2.27899100  | 2.40899800  | -0.73997800 |
| C | 3.30201600  | 1.56291700  | -1.18206300 |
| C | 3.95694300  | 1.02735900  | -0.00044600 |
| C | 3.30213800  | 1.56365800  | 1.18102200  |
| C | 2.27911600  | 2.40948300  | 0.73858800  |
| C | -2.29791500 | -2.32666300 | -0.70377600 |
| C | -3.29332700 | -1.37820200 | -1.15881500 |
| C | -3.96982300 | -0.87261000 | -0.00457900 |
| C | -3.29919600 | -1.37167200 | 1.15628700  |
| C | -2.30236800 | -2.32336600 | 0.71171400  |
| C | -1.45912400 | -3.22317900 | 1.56058300  |
| H | -1.85088800 | -4.24667400 | 1.50160300  |
| H | -0.42140700 | -3.23445900 | 1.21708900  |
| H | -1.46022100 | -2.91477400 | 2.60600600  |
| C | -1.44843900 | -3.22952800 | -1.54322300 |
| H | -0.41195900 | -3.23472600 | -1.19573700 |
| H | -1.83666900 | -4.25403300 | -1.47902800 |
| H | -1.44639700 | -2.92796900 | -2.59063100 |
| C | -3.65531100 | -1.07025100 | -2.57884300 |
| H | -2.82644500 | -1.29074000 | -3.25370800 |
| H | -4.52382900 | -1.66006800 | -2.89723100 |
| H | -3.90039100 | -0.01100300 | -2.68968600 |
| C | -5.21100000 | -0.04009900 | -0.01050400 |
| H | -5.26623700 | 0.59811100  | -0.89281300 |



|    |             |             |             |
|----|-------------|-------------|-------------|
| H  | -6.07902400 | -0.71334400 | -0.01344600 |
| H  | -5.27350800 | 0.59990300  | 0.86998700  |
| C  | -3.66751600 | -1.05510300 | 2.57277300  |
| H  | -3.91466800 | 0.00446700  | 2.67555600  |
| H  | -4.53615000 | -1.64434100 | 2.89190700  |
| H  | -2.84074300 | -1.26956700 | 3.25218000  |
| C  | 3.69134300  | 1.24474900  | 2.59334900  |
| H  | 4.60330200  | 1.77818700  | 2.88809700  |
| H  | 2.89730500  | 1.52075600  | 3.29014300  |
| H  | 3.87637300  | 0.17289600  | 2.71138400  |
| C  | 5.25020400  | 0.28341100  | -0.00036200 |
| H  | 6.07466300  | 1.01062700  | -0.00094300 |
| H  | 5.35205100  | -0.34777800 | 0.88349800  |
| H  | 5.35160000  | -0.34867200 | -0.88364000 |
| C  | 3.69120100  | 1.24329200  | -2.59423500 |
| H  | 4.60395100  | 1.77550200  | -2.88874400 |
| H  | 3.87490200  | 0.17118000  | -2.71206000 |
| H  | 2.89775200  | 1.52022500  | -3.29132100 |
| C  | 1.35993800  | 3.26458700  | -1.54527500 |
| H  | 1.61838600  | 4.32175900  | -1.39927700 |
| H  | 1.42133700  | 3.03852000  | -2.61024000 |
| H  | 0.31997600  | 3.13128100  | -1.22963200 |
| C  | 1.36019900  | 3.26557900  | 1.54351300  |
| H  | 1.61875200  | 4.32264900  | 1.39697400  |
| H  | 0.32019500  | 3.13221500  | 1.22804200  |
| H  | 1.42169100  | 3.04005000  | 2.60859000  |
| I  | -0.08395800 | -0.01589000 | 1.94353500  |
| I  | -0.08355000 | -0.01725900 | -1.94400100 |
| I  | -2.57645700 | 2.21842200  | 0.00020000  |
| I  | 2.76880800  | -2.29201800 | 0.00098500  |
| Co | 1.89271300  | 0.16043100  | -0.00008000 |
| Co | -1.89970700 | -0.33387000 | -0.00012000 |

<sup>5</sup>[Cp\*CoI<sub>2</sub>]<sub>2</sub>, -4737.69694372

|   |             |             |             |
|---|-------------|-------------|-------------|
| C | -2.25374700 | 2.48419400  | 0.72486200  |
| C | -3.27521900 | 1.60576700  | 1.16781900  |
| C | -3.95939100 | 1.10784600  | 0.00029500  |
| C | -3.27567000 | 1.60564200  | -1.16751600 |
| C | -2.25403400 | 2.48411800  | -0.72504100 |
| C | 2.20820200  | -2.35707900 | 0.70692600  |
| C | 3.24104300  | -1.44679000 | 1.15762100  |
| C | 3.93545600  | -0.97148900 | 0.00079900  |
| C | 3.24212000  | -1.44560100 | -1.15723500 |
| C | 2.20902400  | -2.35649500 | -0.70844700 |

|   |             |             |             |
|---|-------------|-------------|-------------|
| C | 1.32751000  | -3.22192900 | -1.55424800 |
| H | 1.67808600  | -4.26020900 | -1.49625400 |
| H | 0.29119100  | -3.19335900 | -1.20722100 |
| H | 1.33763000  | -2.91457900 | -2.59994300 |
| C | 1.32555200  | -3.22304200 | 1.55101300  |
| H | 0.28949200  | -3.19336400 | 1.20328800  |
| H | 1.67546000  | -4.26148700 | 1.49203500  |
| H | 1.33508400  | -2.91694100 | 2.59707900  |
| C | 3.61783300  | -1.14836600 | 2.57579400  |
| H | 2.78642600  | -1.34454300 | 3.25497500  |
| H | 4.47024300  | -1.76297700 | 2.89057000  |
| H | 3.89441400  | -0.09660200 | 2.68395700  |
| C | 5.21018200  | -0.19158400 | 0.00187800  |
| H | 5.29526800  | 0.44412300  | 0.88355900  |
| H | 6.04879600  | -0.90117000 | 0.00239900  |
| H | 5.29659000  | 0.44441800  | -0.87945400 |
| C | 3.62007500  | -1.14560800 | -2.57476400 |
| H | 3.89716500  | -0.09382600 | -2.68140900 |
| H | 4.47240500  | -1.76021600 | -2.88976200 |
| H | 2.78901600  | -1.34054300 | -3.25474000 |
| C | -3.65533300 | 1.30593700  | -2.58658200 |
| H | -4.48432100 | 1.94203300  | -2.92165600 |
| H | -2.81200500 | 1.46970600  | -3.26137900 |
| H | -3.96788500 | 0.26369000  | -2.69534800 |
| C | -5.24346600 | 0.34462200  | 0.00055400  |
| H | -6.08767500 | 1.04814900  | 0.00043500  |
| H | -5.33314700 | -0.29249100 | -0.88108800 |
| H | -5.33304500 | -0.29208300 | 0.88249800  |
| C | -3.65448000 | 1.30637200  | 2.58706100  |
| H | -4.48329900 | 1.94262800  | 2.92224800  |
| H | -3.96711300 | 0.26418300  | 2.69613900  |
| H | -2.81093100 | 1.47018400  | 3.26157000  |
| C | -1.33778800 | 3.32813100  | 1.54846400  |
| H | -1.59977500 | 4.38791300  | 1.42864600  |
| H | -1.39766600 | 3.08065400  | 2.60913000  |
| H | -0.29642400 | 3.20770800  | 1.23184600  |
| C | -1.33840900 | 3.32798500  | -1.54908100 |
| H | -1.60060700 | 4.38775000  | -1.42955900 |
| H | -0.29696600 | 3.20788400  | -1.23261100 |
| H | -1.39843300 | 3.08016400  | -2.60966100 |
| I | 0.08545500  | 0.04456200  | -1.95003800 |
| I | 0.08557000  | 0.04440700  | 1.95034100  |
| I | 2.66518900  | 2.16790700  | -0.00020300 |
| I | -2.81806400 | -2.32990500 | -0.00025300 |

|    |             |             |            |
|----|-------------|-------------|------------|
| Co | -1.84655000 | 0.11014900  | 0.00023700 |
| Co | 1.89148800  | -0.35096600 | 0.00001500 |

**NaOPiv**, -508.969207358

|    |             |             |             |
|----|-------------|-------------|-------------|
| C  | 1.10934100  | 0.01217900  | -0.00000800 |
| C  | 1.57325800  | -0.74934100 | 1.25807900  |
| H  | 1.14229900  | -1.75317400 | 1.27597400  |
| H  | 2.66625100  | -0.83190400 | 1.27294100  |
| H  | 1.26373600  | -0.22567400 | 2.16985800  |
| C  | 1.57322900  | -0.74951200 | -1.25799800 |
| H  | 1.14226200  | -1.75334300 | -1.27575400 |
| H  | 1.26369200  | -0.22596500 | -2.16984200 |
| H  | 2.66622000  | -0.83208200 | -1.27287100 |
| C  | 1.67730000  | 1.43671500  | -0.00010900 |
| H  | 1.34279000  | 1.99126500  | -0.88086400 |
| H  | 1.34281200  | 1.99138100  | 0.88058100  |
| H  | 2.77332900  | 1.40782500  | -0.00012300 |
| C  | -0.43676000 | 0.02837300  | 0.00002700  |
| O  | -1.04625000 | 1.14427300  | 0.00002500  |
| O  | -1.02843200 | -1.10059600 | 0.00002400  |
| Na | -2.90764900 | 0.00107000  | -0.00002200 |

**AgSbF<sub>6</sub>**, -986.893591865

|    |             |             |             |
|----|-------------|-------------|-------------|
| Sb | -1.02195200 | 0.00005300  | -0.00010300 |
| F  | 0.24952400  | -1.38739100 | 0.51390800  |
| F  | -1.98457300 | -1.23086000 | -1.01870200 |
| F  | -1.98406400 | -0.26911400 | 1.57509100  |
| F  | 0.24779100  | 1.14063700  | 0.94425700  |
| F  | 0.24731800  | 0.24967100  | -1.45977300 |
| F  | -1.98729500 | 1.49677400  | -0.55425900 |
| Ag | 2.10683400  | -0.00000300 | 0.00001200  |

**NaI**, -460.211256793

|    |            |            |             |
|----|------------|------------|-------------|
| I  | 0.00000000 | 0.00000000 | 0.47280700  |
| Na | 0.00000000 | 0.00000000 | -2.27806800 |

**AgI**, -444.916441225

|    |            |            |             |
|----|------------|------------|-------------|
| I  | 0.00000000 | 0.00000000 | 1.23794400  |
| Ag | 0.00000000 | 0.00000000 | -1.39597900 |

**OPiv<sup>-</sup>**, -346.705809073

|   |            |             |            |
|---|------------|-------------|------------|
| C | 0.53087000 | 0.01408800  | 0.00000500 |
| C | 0.99321100 | -0.75049100 | 1.25107900 |
| H | 0.49817300 | -1.72537400 | 1.27473800 |

|   |             |             |             |
|---|-------------|-------------|-------------|
| H | 2.08546700  | -0.89517200 | 1.26965700  |
| H | 0.71203100  | -0.20862500 | 2.16354700  |
| C | 0.99312800  | -0.74985200 | -1.25149100 |
| H | 0.49812800  | -1.72474200 | -1.27560000 |
| H | 0.71184800  | -0.20753900 | -2.16366400 |
| H | 2.08538800  | -0.89447700 | -1.27023800 |
| C | 1.10187100  | 1.43525100  | 0.00034300  |
| H | 0.74899500  | 1.98663100  | -0.87632800 |
| H | 0.74907500  | 1.98618200  | 0.87732900  |
| H | 2.20412400  | 1.43210100  | 0.00029100  |
| C | -1.06530200 | 0.03030000  | 0.00009300  |
| O | -1.61109500 | 1.16073100  | 0.00000400  |
| O | -1.59089200 | -1.11382500 | 0.00000800  |

**SbF<sub>6</sub><sup>-</sup>**, -840.005686376

|    |             |             |             |
|----|-------------|-------------|-------------|
| Sb | 0.00000000  | 0.00000000  | 0.00000000  |
| F  | 0.00000000  | 0.00000000  | 1.89494000  |
| F  | 0.00000000  | 1.89494000  | 0.00000000  |
| F  | 1.89494000  | 0.00000000  | 0.00000000  |
| F  | 0.00000000  | -1.89494000 | 0.00000000  |
| F  | -1.89494000 | 0.00000000  | 0.00000000  |
| F  | 0.00000000  | 0.00000000  | -1.89494000 |

**NaSbF<sub>6</sub>**, -1002.23001606

|    |             |             |             |
|----|-------------|-------------|-------------|
| Sb | -0.34726300 | -0.00003500 | -0.00001700 |
| F  | 0.92492200  | 0.93369400  | 1.13862800  |
| F  | -1.31740200 | -0.56223100 | 1.49233500  |
| F  | -1.31823800 | 1.57318600  | -0.25805100 |
| F  | 0.92359500  | 0.51952200  | -1.37889400 |
| F  | 0.92413400  | -1.45378000 | 0.23813600  |
| F  | -1.32005200 | -1.01009800 | -1.23199300 |
| Na | 2.57798100  | -0.00007500 | -0.00005300 |

**<sup>1</sup>Cp\*Co(OPiv)<sub>2</sub>**, -2466.36279553

|    |             |             |             |
|----|-------------|-------------|-------------|
| C  | 0.02197800  | -2.56739500 | 0.11819100  |
| C  | -0.77917400 | -2.15261100 | 1.21634300  |
| C  | -2.05552500 | -1.69974800 | 0.69265600  |
| C  | -0.71490100 | -2.31844300 | -1.09349700 |
| C  | -2.02361100 | -1.84344700 | -0.72079200 |
| Co | -0.49726700 | -0.54679800 | -0.08348800 |
| C  | -0.21844900 | -2.55057500 | -2.48771700 |
| H  | 0.81925000  | -2.22009000 | -2.58168600 |
| H  | -0.26503400 | -3.61245900 | -2.75853200 |
| H  | -0.81264000 | -1.98941300 | -3.21268000 |

|   |             |             |             |
|---|-------------|-------------|-------------|
| C | -3.07617000 | -1.42491000 | -1.70096100 |
| H | -2.71259000 | -0.59385200 | -2.31275400 |
| H | -3.33038500 | -2.25744100 | -2.36519600 |
| H | -3.98792800 | -1.09667800 | -1.19922200 |
| C | -3.15849500 | -1.12596500 | 1.53011700  |
| H | -3.97110700 | -0.73797100 | 0.91266500  |
| H | -3.57442200 | -1.88332100 | 2.20362300  |
| H | -2.77676100 | -0.30061100 | 2.13829900  |
| C | -0.36000700 | -2.14188600 | 2.65389600  |
| H | -1.10289800 | -1.63936300 | 3.27639200  |
| H | -0.23384000 | -3.16387800 | 3.02983000  |
| H | 0.58872600  | -1.60713200 | 2.74668300  |
| C | 1.41309400  | -3.11081800 | 0.19013000  |
| H | 1.38648600  | -4.20716100 | 0.16342700  |
| H | 2.00623300  | -2.76575300 | -0.65984500 |
| H | 1.91268700  | -2.78380500 | 1.10131200  |
| C | 3.49853700  | 0.66699600  | -0.15836600 |
| C | 4.55957700  | 0.64820800  | 0.94963800  |
| H | 4.22000900  | 1.20850000  | 1.82443300  |
| H | 4.76389300  | -0.37473200 | 1.27783100  |
| H | 5.49333400  | 1.09264800  | 0.58635400  |
| C | 3.98094900  | -0.15131600 | -1.37313300 |
| H | 4.17574700  | -1.19274500 | -1.09062600 |
| H | 3.22948700  | -0.14542200 | -2.16650700 |
| H | 4.91349300  | 0.26738600  | -1.76873800 |
| C | 3.20376500  | 2.11666800  | -0.59362900 |
| H | 2.43315300  | 2.13659900  | -1.36813600 |
| H | 2.85365200  | 2.71322800  | 0.25666900  |
| H | 4.11121600  | 2.59050600  | -0.98565600 |
| C | 2.18369400  | 0.04388800  | 0.36808400  |
| O | 1.25255900  | -0.01389400 | -0.54847500 |
| O | 2.07509000  | -0.35123100 | 1.52959500  |
| C | -1.42490000 | 3.18386700  | 0.01625500  |
| C | -0.36198800 | 3.87049000  | -0.87047300 |
| H | -0.38397900 | 3.46575400  | -1.88551400 |
| H | -0.55783400 | 4.94710600  | -0.91496900 |
| H | 0.64266800  | 3.71957000  | -0.46504300 |
| C | -2.82795500 | 3.39289000  | -0.59070900 |
| H | -2.88015600 | 2.97854300  | -1.60064200 |
| H | -3.59800500 | 2.90969000  | 0.02093200  |
| H | -3.05648500 | 4.46266600  | -0.63828300 |
| C | -1.36395300 | 3.72917900  | 1.45019800  |
| H | -2.10181100 | 3.23846800  | 2.09163400  |
| H | -0.37815200 | 3.56257300  | 1.89142900  |

|   |             |            |             |
|---|-------------|------------|-------------|
| H | -1.56976200 | 4.80467200 | 1.44609000  |
| C | -1.12330700 | 1.69467300 | 0.00625500  |
| O | -0.76292400 | 1.05901800 | 1.04983900  |
| O | -1.19835000 | 1.01598100 | -1.07524900 |

<sup>3</sup>Cp\*Co(OPiv)<sub>2</sub>, -2466.36283833

|    |             |             |             |
|----|-------------|-------------|-------------|
| C  | 1.11859400  | -2.20670900 | 0.52530400  |
| C  | -0.04827000 | -2.13299300 | 1.30966300  |
| C  | -1.15804300 | -2.20157200 | 0.40088100  |
| C  | 0.72557500  | -2.40400600 | -0.89841700 |
| C  | -0.65441500 | -2.41141600 | -0.96348400 |
| Co | 0.00277200  | -0.25400700 | 0.02706000  |
| C  | 1.71818400  | -2.48116600 | -2.01174400 |
| H  | 2.23780200  | -1.52019700 | -2.10301800 |
| H  | 2.46984800  | -3.25548300 | -1.81957100 |
| H  | 1.23651600  | -2.69841500 | -2.96695400 |
| C  | -1.53916200 | -2.49185500 | -2.16807000 |
| H  | -0.96452600 | -2.69536600 | -3.07392600 |
| H  | -2.29041600 | -3.28222300 | -2.05717400 |
| H  | -2.06287000 | -1.53957200 | -2.30640200 |
| C  | -2.60042500 | -2.16814900 | 0.77537600  |
| H  | -3.20364200 | -1.75898400 | -0.03891800 |
| H  | -2.96305500 | -3.18423500 | 0.98223100  |
| H  | -2.75945600 | -1.55624200 | 1.66466700  |
| C  | -0.15434600 | -1.93487200 | 2.79273400  |
| H  | -0.83886600 | -1.11126500 | 3.01679700  |
| H  | -0.52490600 | -2.83694700 | 3.29406500  |
| H  | 0.81546800  | -1.68048800 | 3.22434500  |
| C  | 2.53564100  | -2.18374700 | 0.99330100  |
| H  | 2.90980600  | -3.20617900 | 1.13656700  |
| H  | 3.17749700  | -1.69957600 | 0.25252200  |
| H  | 2.63411600  | -1.63955800 | 1.93328700  |
| C  | 3.37933200  | 1.88914300  | -0.07446200 |
| C  | 3.96614700  | 2.15520900  | 1.31858600  |
| H  | 3.24539800  | 2.67585700  | 1.95359500  |
| H  | 4.23038100  | 1.21881800  | 1.81920300  |
| H  | 4.86971200  | 2.76892800  | 1.23389000  |
| C  | 4.39197600  | 1.12622200  | -0.95174400 |
| H  | 4.68123600  | 0.17717500  | -0.48524700 |
| H  | 3.96689100  | 0.91037000  | -1.93481200 |
| H  | 5.30079100  | 1.72332900  | -1.08380700 |
| C  | 2.99618200  | 3.21859700  | -0.76145100 |
| H  | 2.55418600  | 3.03128800  | -1.74344500 |
| H  | 2.27094600  | 3.77456000  | -0.15792100 |

|   |             |            |             |
|---|-------------|------------|-------------|
| H | 3.88582700  | 3.84543000 | -0.88792200 |
| C | 2.10141400  | 1.05351000 | 0.03283900  |
| O | 1.55054500  | 0.62197900 | -1.04095600 |
| O | 1.56774300  | 0.78867100 | 1.14791700  |
| C | -3.37221000 | 1.89115800 | -0.08078400 |
| C | -4.03415600 | 1.83774600 | -1.46500700 |
| H | -4.33861100 | 0.81677700 | -1.71669000 |
| H | -4.92544700 | 2.47458800 | -1.47911900 |
| H | -3.34541000 | 2.17774400 | -2.24173100 |
| C | -4.34027200 | 1.38022900 | 1.00340500  |
| H | -4.66330000 | 0.35464600 | 0.79164300  |
| H | -3.86118600 | 1.39044900 | 1.98504000  |
| H | -5.23352800 | 2.01321200 | 1.03860500  |
| C | -2.93591100 | 3.33646100 | 0.25018700  |
| H | -2.44191200 | 3.37592300 | 1.22472600  |
| H | -2.24004200 | 3.71651100 | -0.50507700 |
| H | -3.81046600 | 3.99604500 | 0.27162400  |
| C | -2.10416300 | 1.03412300 | -0.05742400 |
| O | -1.53894100 | 0.77453700 | 1.05427900  |
| O | -1.58480400 | 0.59553800 | -1.13246800 |

<sup>5</sup>Cp\*Co(OPiv)<sub>2</sub>, -2466.35125451

|    |             |             |             |
|----|-------------|-------------|-------------|
| C  | 1.14510000  | -2.15856000 | 0.48166300  |
| C  | 0.00041300  | -1.99591000 | 1.31337300  |
| C  | -1.14393100 | -2.15878700 | 0.48126400  |
| C  | 0.69594200  | -2.37351200 | -0.89318000 |
| C  | -0.69426700 | -2.37367900 | -0.89343000 |
| Co | -0.00018400 | -0.05551900 | 0.04506000  |
| C  | 1.62759900  | -2.49376100 | -2.05767700 |
| H  | 2.18145900  | -1.55772000 | -2.19092500 |
| H  | 2.35722900  | -3.29722100 | -1.90144400 |
| H  | 1.08999700  | -2.70194700 | -2.98511900 |
| C  | -1.62552200 | -2.49426600 | -2.05821700 |
| H  | -1.08758600 | -2.70252800 | -2.98544900 |
| H  | -2.35505200 | -3.29783400 | -1.90207600 |
| H  | -2.17953000 | -1.55836100 | -2.19178500 |
| C  | -2.57177200 | -2.14179700 | 0.91569800  |
| H  | -3.22070200 | -1.78650800 | 0.11057300  |
| H  | -2.90712700 | -3.15215500 | 1.18688100  |
| H  | -2.71347100 | -1.49216600 | 1.78155800  |
| C  | 0.00005000  | -1.77679000 | 2.79817100  |
| H  | -0.87894000 | -1.20372500 | 3.10365400  |
| H  | -0.00103300 | -2.72486900 | 3.35056200  |
| H  | 0.87983100  | -1.20533800 | 3.10436400  |

|   |             |             |             |
|---|-------------|-------------|-------------|
| C | 2.57277800  | -2.14110300 | 0.91656800  |
| H | 2.90815300  | -3.15120000 | 1.18869400  |
| H | 3.22196400  | -1.78636900 | 0.11140500  |
| H | 2.71410200  | -1.49075000 | 1.78195500  |
| C | 3.52370200  | 1.77436000  | -0.09655300 |
| C | 4.14664800  | 1.93727500  | 1.29725100  |
| H | 3.46931600  | 2.46775000  | 1.97038600  |
| H | 4.36544700  | 0.96345500  | 1.74620800  |
| H | 5.08355100  | 2.49984200  | 1.22378400  |
| C | 4.47548600  | 1.00244900  | -1.03081500 |
| H | 4.72433200  | 0.01954400  | -0.61551100 |
| H | 4.02038300  | 0.85410900  | -2.01263500 |
| H | 5.41017700  | 1.55955000  | -1.15496700 |
| C | 3.20454300  | 3.15838300  | -0.70828400 |
| H | 2.74203500  | 3.04845000  | -1.69290500 |
| H | 2.52066600  | 3.72180500  | -0.06487200 |
| H | 4.12698100  | 3.73903000  | -0.81656400 |
| C | 2.19711800  | 1.02236400  | -0.00572500 |
| O | 1.64159600  | 0.58450000  | -1.07133600 |
| O | 1.60766400  | 0.84157000  | 1.10618600  |
| C | -3.52457000 | 1.77336300  | -0.09649800 |
| C | -4.47606200 | 1.00144800  | -1.03102400 |
| H | -4.72468800 | 0.01837200  | -0.61600000 |
| H | -5.41088700 | 1.55833900  | -1.15511800 |
| H | -4.02084700 | 0.85347000  | -2.01284700 |
| C | -4.14763900 | 1.93568700  | 1.29732800  |
| H | -4.36614400 | 0.96166600  | 1.74600100  |
| H | -3.47051700 | 2.46619800  | 1.97064200  |
| H | -5.08472600 | 2.49796100  | 1.22396700  |
| C | -3.20580600 | 3.15767500  | -0.70781000 |
| H | -2.52208000 | 3.72109700  | -0.06423800 |
| H | -2.74328500 | 3.04817700  | -1.69247500 |
| H | -4.12841500 | 3.73808400  | -0.81589400 |
| C | -2.19773300 | 1.02179200  | -0.00581100 |
| O | -1.60800600 | 0.84141500  | 1.10604300  |
| O | -1.64226700 | 0.58389300  | -1.07141700 |

<sup>1</sup>1, -2119.58287379

|   |             |             |             |
|---|-------------|-------------|-------------|
| C | -2.30007300 | -0.74722800 | -0.65305000 |
| C | -1.85693700 | -1.17507600 | 0.61843900  |
| C | -2.30908100 | 0.71893400  | -0.67024600 |
| C | -1.52079100 | 0.01485200  | 1.38145300  |
| C | -1.87190500 | 1.18195100  | 0.59094500  |
| C | -1.61980800 | -2.57397200 | 1.09049000  |



|    |             |             |             |
|----|-------------|-------------|-------------|
| H  | -2.27081200 | -2.79533400 | 1.94297700  |
| H  | -1.81957500 | -3.30680600 | 0.30858900  |
| H  | -0.58338900 | -2.70055300 | 1.41721800  |
| C  | -2.66325100 | -1.60141600 | -1.82492200 |
| H  | -2.34240700 | -2.63504700 | -1.69221900 |
| H  | -3.75089700 | -1.59555100 | -1.96423800 |
| H  | -2.21830200 | -1.22076500 | -2.74905600 |
| C  | -2.68230000 | 1.54091500  | -1.86186200 |
| H  | -2.23275300 | 1.14399900  | -2.77689500 |
| H  | -3.76978000 | 1.51886000  | -2.00086900 |
| C  | -1.65126900 | 2.59446000  | 1.02956200  |
| H  | -1.86588500 | 3.30643600  | 0.23247600  |
| H  | -2.29995100 | 2.82638800  | 1.88096200  |
| H  | -0.61462700 | 2.74265100  | 1.34654100  |
| C  | -0.96665700 | 0.03437200  | 2.76620500  |
| H  | -0.34966900 | -0.84492300 | 2.96182400  |
| H  | -0.37108600 | 0.93170100  | 2.94538500  |
| H  | -1.79182800 | 0.03106300  | 3.49016700  |
| C  | 1.88144400  | 0.01791300  | -0.24128500 |
| O  | 1.17068600  | 1.09308300  | -0.23472300 |
| O  | 1.17984800  | -1.06648300 | -0.21964800 |
| C  | 3.38451700  | 0.01002600  | -0.22295200 |
| C  | 3.78431800  | -0.36292600 | 1.23146900  |
| H  | 4.87546000  | -0.39339700 | 1.29778700  |
| H  | 3.42231600  | 0.38203400  | 1.94720500  |
| H  | 3.39363400  | -1.34537300 | 1.50978600  |
| C  | 3.89194700  | -1.07145900 | -1.20039200 |
| H  | 3.61500500  | -0.83323100 | -2.23203800 |
| H  | 4.98298300  | -1.11801800 | -1.14585400 |
| H  | 3.48906600  | -2.05553100 | -0.95048200 |
| C  | 3.92995900  | 1.39862400  | -0.59239400 |
| H  | 5.02203300  | 1.38043300  | -0.54295100 |
| H  | 3.63945700  | 1.68242300  | -1.60787600 |
| H  | 3.56649800  | 2.16767300  | 0.09349600  |
| H  | -2.37379600 | 2.58113200  | -1.75355900 |
| Co | -0.39765400 | 0.00211500  | -0.25822800 |

<sup>31</sup>I, -2119.58352165

|   |            |             |             |
|---|------------|-------------|-------------|
| C | 1.92628300 | -0.69052900 | 1.16996700  |
| C | 2.09281700 | -1.15573600 | -0.21847200 |
| C | 1.93904300 | 0.70715600  | 1.15509500  |
| C | 2.26666300 | -0.01823100 | -1.06901800 |
| C | 2.11381000 | 1.13982600  | -0.24282000 |
| C | 2.15353100 | -2.59305200 | -0.61436700 |

|    |             |             |             |
|----|-------------|-------------|-------------|
| H  | 3.13513100  | -3.00485900 | -0.34552700 |
| H  | 1.39917100  | -3.18420200 | -0.08814800 |
| H  | 2.01753000  | -2.72868600 | -1.68823100 |
| C  | 1.75039200  | -1.60797700 | 2.33768000  |
| H  | 0.95997400  | -2.34142300 | 2.15026600  |
| H  | 2.67535500  | -2.16803000 | 2.51881400  |
| H  | 1.50134400  | -1.06322300 | 3.24906900  |
| C  | 1.78042000  | 1.65201900  | 2.30328500  |
| H  | 1.52014100  | 1.13134000  | 3.22555300  |
| H  | 2.71615600  | 2.19735800  | 2.47372700  |
| C  | 2.20103600  | 2.56722500  | -0.66887300 |
| H  | 1.45913300  | 3.18371500  | -0.15415900 |
| H  | 3.19081800  | 2.96581200  | -0.41032400 |
| H  | 2.06562600  | 2.68293900  | -1.74515600 |
| C  | 2.56429100  | -0.03675600 | -2.54039300 |
| H  | 2.14430600  | -0.92017500 | -3.02619100 |
| H  | 2.16343900  | 0.84526300  | -3.04453100 |
| H  | 3.64734300  | -0.05021200 | -2.70700700 |
| C  | -2.02022400 | 0.02811200  | -0.13637900 |
| O  | -1.31728400 | 1.10876000  | -0.16645000 |
| O  | -1.32729500 | -1.06377900 | -0.14693600 |
| C  | -3.52463900 | 0.01438000  | -0.07595800 |
| C  | -4.03468700 | -0.83783000 | -1.26320400 |
| H  | -5.12557000 | -0.89535400 | -1.21475900 |
| H  | -3.76274600 | -0.38533600 | -2.22209700 |
| H  | -3.63071600 | -1.85222600 | -1.22581600 |
| C  | -3.91814800 | -0.66176600 | 1.26207500  |
| H  | -3.55805500 | -0.08479700 | 2.12000400  |
| H  | -5.00867300 | -0.71294100 | 1.32435200  |
| H  | -3.51854400 | -1.67687600 | 1.32507800  |
| C  | -4.07747200 | 1.44586200  | -0.14791700 |
| H  | -5.16928100 | 1.41201600  | -0.09975900 |
| H  | -3.71579000 | 2.05658600  | 0.68336700  |
| H  | -3.79081200 | 1.93806000  | -1.08110900 |
| H  | 1.00487300  | 2.39702000  | 2.09993500  |
| Co | 0.28428400  | 0.00865300  | -0.20176900 |

<sup>51</sup>, -2119.56361928

|   |            |             |             |
|---|------------|-------------|-------------|
| C | 2.19570400 | -1.03133700 | 0.65684700  |
| C | 2.20102800 | -1.01797700 | -0.74316500 |
| C | 2.18305400 | 0.36691100  | 1.12179100  |
| C | 2.19124300 | 0.38922500  | -1.18181600 |
| C | 2.13976000 | 1.22704300  | -0.02239900 |
| C | 2.24748800 | -2.18546900 | -1.67807200 |

|    |             |             |             |
|----|-------------|-------------|-------------|
| H  | 3.23098800  | -2.24587400 | -2.15977300 |
| H  | 2.06991800  | -3.12795600 | -1.15875100 |
| H  | 1.50437100  | -2.09413100 | -2.47655300 |
| C  | 2.23574100  | -2.21661800 | 1.56963700  |
| H  | 2.06150900  | -3.14888300 | 1.03108300  |
| H  | 3.21594400  | -2.28660700 | 2.05666500  |
| H  | 1.48712800  | -2.14056200 | 2.36455600  |
| C  | 2.26234500  | 0.78755700  | 2.54968900  |
| H  | 1.73538500  | 0.09377200  | 3.21025400  |
| H  | 3.31374000  | 0.79489000  | 2.87019500  |
| C  | 2.18600500  | 2.72867500  | -0.00741700 |
| H  | 1.68810900  | 3.13700500  | 0.87478000  |
| H  | 3.22374100  | 3.08064600  | 0.00246900  |
| H  | 1.69897300  | 3.15422600  | -0.88750100 |
| C  | 2.27958000  | 0.83619000  | -2.60116500 |
| H  | 1.75335200  | 0.15693900  | -3.27729300 |
| H  | 1.89050100  | 1.84697500  | -2.73848700 |
| H  | 3.33258000  | 0.84528500  | -2.91625100 |
| C  | -2.16134300 | 0.03494700  | -0.04921400 |
| O  | -1.49178700 | 1.13265300  | -0.04054500 |
| O  | -1.45207600 | -1.04342600 | -0.05114800 |
| C  | -3.67111800 | -0.01552200 | -0.05672300 |
| C  | -4.10149300 | -0.78630300 | -1.32850000 |
| H  | -5.19187000 | -0.86887400 | -1.34222800 |
| H  | -3.79234900 | -0.25813100 | -2.23634500 |
| H  | -3.67589300 | -1.79252100 | -1.34383900 |
| C  | -4.11364200 | -0.79828200 | 1.20352400  |
| H  | -3.81324500 | -0.27873900 | 2.11924600  |
| H  | -5.20409700 | -0.88092900 | 1.20599900  |
| H  | -3.68816300 | -1.80462000 | 1.21342000  |
| C  | -4.25717700 | 1.40397500  | -0.05281600 |
| H  | -5.34900100 | 1.34371600  | -0.05833900 |
| H  | -3.94835400 | 1.96059900  | 0.83592000  |
| H  | -3.93987200 | 1.96896000  | -0.93325100 |
| H  | 1.86879200  | 1.79420600  | 2.70386100  |
| Co | 0.19158600  | 0.06296100  | -0.03802300 |

<sup>1</sup>Cp\*Co(OPiv)(SbF<sub>6</sub>), -2959.60992433

|    |            |             |             |
|----|------------|-------------|-------------|
| C  | 1.31264800 | -2.44901400 | -0.71144100 |
| C  | 2.50820000 | -1.73049200 | -0.96203500 |
| C  | 2.95780700 | -1.16327600 | 0.29940800  |
| C  | 1.02952800 | -2.38047300 | 0.71172700  |
| C  | 2.06286300 | -1.62238900 | 1.32898900  |
| Co | 1.13405600 | -0.44759400 | -0.11175700 |

|    |             |             |             |
|----|-------------|-------------|-------------|
| C  | -0.10344500 | -3.06776200 | 1.40596200  |
| H  | -1.02530600 | -3.00057000 | 0.82901500  |
| H  | 0.14560300  | -4.12754400 | 1.54438300  |
| H  | -0.29422200 | -2.62371000 | 2.38275000  |
| C  | 2.07702700  | -1.23120200 | 2.77332400  |
| H  | 1.13081100  | -0.75000700 | 3.03643900  |
| H  | 2.19881800  | -2.11862500 | 3.40352700  |
| H  | 2.88628600  | -0.53520600 | 2.99653400  |
| C  | 4.15578500  | -0.28024600 | 0.45924200  |
| H  | 4.10172400  | 0.29700800  | 1.38419300  |
| H  | 5.07871200  | -0.87132900 | 0.47903900  |
| H  | 4.21791200  | 0.42531500  | -0.37252300 |
| C  | 3.14710300  | -1.43810500 | -2.28319500 |
| H  | 3.21109500  | -0.35644900 | -2.43701400 |
| H  | 4.16319300  | -1.84658700 | -2.31352100 |
| H  | 2.57978300  | -1.86754200 | -3.11004300 |
| C  | 0.40114600  | -3.09564500 | -1.70605900 |
| H  | 0.47202900  | -4.18656200 | -1.62540100 |
| H  | -0.63538700 | -2.80907000 | -1.51009800 |
| H  | 0.64921800  | -2.80916300 | -2.72926200 |
| C  | 1.14458000  | 3.36323200  | -0.01588800 |
| C  | 0.49570400  | 3.84558900  | 1.29009200  |
| H  | 1.09272700  | 3.55851900  | 2.16067600  |
| H  | 0.41029900  | 4.93682900  | 1.27393600  |
| H  | -0.49989100 | 3.41104100  | 1.40053700  |
| C  | 2.57468000  | 3.92663000  | -0.17192000 |
| H  | 3.20697400  | 3.64679200  | 0.67815100  |
| H  | 3.04249000  | 3.55930700  | -1.08975300 |
| H  | 2.53393800  | 5.01942700  | -0.21685700 |
| C  | 0.27791300  | 3.76307900  | -1.23199000 |
| H  | 0.72752400  | 3.41210200  | -2.16431700 |
| H  | -0.72262500 | 3.33385100  | -1.14262900 |
| H  | 0.19251500  | 4.85386300  | -1.27163700 |
| C  | 1.24737200  | 1.85475500  | -0.01052200 |
| O  | 1.66128700  | 1.19841900  | -1.03270500 |
| O  | 0.90640300  | 1.13497700  | 0.98830800  |
| Sb | -2.35711700 | -0.03175100 | -0.02885400 |
| F  | -1.89053000 | 1.78590100  | 0.19903100  |
| F  | -1.42501800 | -0.47144000 | 1.56492900  |
| F  | -3.98700400 | 0.10643500  | 0.87367600  |
| F  | -3.06858600 | 0.34801800  | -1.71971400 |
| F  | -0.60654300 | -0.24094200 | -0.97213000 |
| F  | -2.52740400 | -1.89270500 | -0.36758700 |

<sup>3</sup>Cp\*Co(OPiv)(SbF<sub>6</sub>), -2959.60190353

|    |             |             |             |
|----|-------------|-------------|-------------|
| C  | 1.23307500  | 2.43320600  | 1.18996700  |
| C  | 2.04993800  | 2.17668200  | 0.01471000  |
| C  | 1.25056400  | 2.42395200  | -1.18664700 |
| C  | -0.04682600 | 2.74737200  | 0.73102900  |
| C  | -0.03285800 | 2.74493100  | -0.75980800 |
| Co | 0.57143800  | 0.59942000  | 0.00768600  |
| C  | -1.27287200 | 3.04212100  | 1.52721000  |
| H  | -1.11036500 | 2.88482000  | 2.59422100  |
| H  | -1.58276100 | 4.08342900  | 1.37289600  |
| H  | -2.09957000 | 2.40318400  | 1.20425300  |
| C  | -1.24569400 | 3.03092000  | -1.58087600 |
| H  | -2.07379100 | 2.38523200  | -1.27527100 |
| H  | -1.56740100 | 4.06982300  | -1.43611300 |
| H  | -1.05950200 | 2.87297000  | -2.64405100 |
| C  | 1.76767700  | 2.25562300  | -2.58242400 |
| H  | 0.97883500  | 2.41148000  | -3.32032800 |
| H  | 2.57530500  | 2.96633300  | -2.79208900 |
| H  | 2.16080800  | 1.24282200  | -2.71607800 |
| C  | 3.49834400  | 1.82953600  | 0.02513700  |
| H  | 3.75563600  | 1.22296800  | -0.84538900 |
| H  | 4.10405400  | 2.74511900  | -0.00278000 |
| H  | 3.75741800  | 1.27478000  | 0.92884000  |
| C  | 1.71500100  | 2.27781700  | 2.60080400  |
| H  | 2.50799000  | 2.99896000  | 2.82923200  |
| H  | 0.90469600  | 2.42845700  | 3.31622000  |
| H  | 2.11413700  | 1.26995600  | 2.75210200  |
| Sb | -2.24546800 | -0.90609600 | -0.00054300 |
| F  | -0.97648100 | -0.07932500 | -1.25270900 |
| F  | -3.13681500 | 0.76776800  | -0.02503700 |
| F  | -3.28205600 | -1.56154000 | -1.40797800 |
| F  | -1.11547700 | -2.40956100 | 0.02623600  |
| F  | -0.99333600 | -0.05386300 | 1.25326800  |
| F  | -3.30321300 | -1.52878500 | 1.40610700  |
| C  | 2.16611400  | -1.22218500 | 0.03090600  |
| O  | 1.77767400  | -0.69285100 | 1.12108100  |
| O  | 1.79607000  | -0.67731700 | -1.06369200 |
| C  | 2.99053500  | -2.50241600 | 0.00513200  |
| C  | 2.05040300  | -3.60466200 | -0.53974300 |
| H  | 2.57758800  | -4.56456800 | -0.55378500 |
| H  | 1.15715300  | -3.70176700 | 0.08406300  |
| H  | 1.72453500  | -3.36498600 | -1.55502000 |
| C  | 4.18460900  | -2.30773600 | -0.94934700 |
| H  | 4.86345600  | -1.53039200 | -0.57955200 |

|   |            |             |             |
|---|------------|-------------|-------------|
| H | 4.75373100 | -3.23964400 | -1.03001900 |
| H | 3.84133900 | -2.01918500 | -1.94570000 |
| C | 3.47375500 | -2.86001000 | 1.41759800  |
| H | 4.04977100 | -3.79084900 | 1.38832100  |
| H | 4.11362500 | -2.07257800 | 1.82827800  |
| H | 2.62919900 | -2.99161700 | 2.09795200  |

<sup>5</sup>Cp\*Co(OPiv)(SbF<sub>6</sub>), -2959.5869179

|    |             |             |             |
|----|-------------|-------------|-------------|
| C  | 1.14121000  | 2.39767100  | 1.17290900  |
| C  | 1.97989200  | 2.24681400  | 0.00254200  |
| C  | 1.15402400  | 2.38223900  | -1.17771300 |
| C  | -0.15711600 | 2.68999400  | 0.72568500  |
| C  | -0.14934500 | 2.68059000  | -0.74756200 |
| Co | 0.50349300  | 0.40121000  | 0.00466600  |
| C  | -1.37700400 | 2.96174000  | 1.54247300  |
| H  | -1.20714600 | 2.76247800  | 2.60175700  |
| H  | -1.67818500 | 4.01219600  | 1.43708100  |
| H  | -2.21618900 | 2.34662100  | 1.20780000  |
| C  | -1.36052200 | 2.94194600  | -1.58039800 |
| H  | -2.20345800 | 2.33179500  | -1.24599200 |
| H  | -1.66205700 | 3.99388300  | -1.49197400 |
| H  | -1.18005800 | 2.72852900  | -2.63515600 |
| C  | 1.65810300  | 2.23613400  | -2.58194100 |
| H  | 0.84099300  | 2.26830000  | -3.30509400 |
| H  | 2.36545000  | 3.03472400  | -2.83492100 |
| H  | 2.17179700  | 1.27688900  | -2.69983700 |
| C  | 3.44701800  | 1.98187000  | 0.01360700  |
| H  | 3.75150800  | 1.42960500  | -0.87820000 |
| H  | 4.00965200  | 2.92482100  | 0.03536700  |
| H  | 3.73116500  | 1.40299200  | 0.89571600  |
| C  | 1.63156200  | 2.27028700  | 2.58371800  |
| H  | 2.33823400  | 3.07108200  | 2.83173700  |
| H  | 0.80784000  | 2.31452200  | 3.29867100  |
| H  | 2.14253800  | 1.31206600  | 2.72059700  |
| Sb | -2.35956600 | -0.95608900 | 0.00130400  |
| F  | -1.09141000 | -0.10459400 | -1.25165400 |
| F  | -3.28222900 | 0.69305300  | -0.01280600 |
| F  | -3.37286300 | -1.63823200 | -1.40788700 |
| F  | -1.16531300 | -2.41159200 | 0.01656800  |
| F  | -1.09959700 | -0.08917700 | 1.25285400  |
| F  | -3.38335900 | -1.61849900 | 1.41236500  |
| C  | 2.36842300  | -1.13379000 | 0.02573900  |
| O  | 1.89534400  | -0.66826000 | 1.11604300  |
| O  | 1.89643600  | -0.68082800 | -1.07382800 |

|   |            |             |             |
|---|------------|-------------|-------------|
| C | 3.43237300 | -2.22136000 | 0.01049500  |
| C | 2.74364600 | -3.49821700 | -0.52733000 |
| H | 3.46673900 | -4.31983700 | -0.56101600 |
| H | 1.91181500 | -3.79674700 | 0.11851500  |
| H | 2.35190300 | -3.33169900 | -1.53391900 |
| C | 4.56158200 | -1.79150300 | -0.94779900 |
| H | 5.06451500 | -0.88808900 | -0.58500900 |
| H | 5.30999600 | -2.58721600 | -1.01976300 |
| H | 4.16743600 | -1.58863700 | -1.94638300 |
| C | 3.97924000 | -2.45994100 | 1.42498000  |
| H | 4.73276600 | -3.25391200 | 1.40187700  |
| H | 4.44552400 | -1.55482900 | 1.82625300  |
| H | 3.18096100 | -2.75442500 | 2.11027700  |

<sup>1</sup>[Cp\*Co(SbF<sub>6</sub>)]<sup>+</sup>, -2612.78480565

|    |             |             |             |
|----|-------------|-------------|-------------|
| C  | 2.43655300  | -0.36365900 | 1.16905200  |
| C  | 2.39906600  | -1.21414900 | 0.00134800  |
| C  | 2.43692100  | -0.36614200 | -1.16799900 |
| C  | 2.40577500  | 0.99537500  | 0.72696400  |
| C  | 2.40553300  | 0.99382000  | -0.72879900 |
| Co | 0.78753400  | -0.00071600 | 0.00008600  |
| C  | 2.32610500  | 2.22337300  | 1.57343200  |
| H  | 2.04894800  | 1.99351000  | 2.60250200  |
| H  | 3.30115600  | 2.72461600  | 1.58534200  |
| H  | 1.59536300  | 2.92959400  | 1.17139200  |
| C  | 2.32630000  | 2.21956800  | -1.57850700 |
| H  | 1.60933400  | 2.93512800  | -1.16857100 |
| H  | 3.30650200  | 2.71009000  | -1.60710000 |
| H  | 2.03140700  | 1.98875500  | -2.60249700 |
| C  | 2.36082000  | -0.86131600 | -2.57368600 |
| H  | 2.18310500  | -0.05551000 | -3.28538800 |
| H  | 3.30643600  | -1.35034400 | -2.83521300 |
| H  | 1.56434400  | -1.60236000 | -2.68458200 |
| C  | 2.35429800  | -2.70785000 | 0.00274000  |
| H  | 1.84928000  | -3.09341300 | -0.88498400 |
| H  | 3.37530600  | -3.10849300 | 0.00854100  |
| H  | 1.84018000  | -3.09155300 | 0.88608400  |
| C  | 2.36059700  | -0.85564600 | 2.57580500  |
| H  | 3.31143000  | -1.33155500 | 2.84280500  |
| H  | 2.16957700  | -0.05009600 | 3.28438100  |
| H  | 1.57333500  | -1.60646800 | 2.68575800  |
| Sb | -2.04019200 | -0.00256600 | -0.00001000 |
| F  | -0.61505800 | -0.70008000 | -1.22065100 |
| F  | -0.63422700 | 1.41335200  | -0.00026000 |

|   |             |             |             |
|---|-------------|-------------|-------------|
| F | -2.91099500 | 0.80503900  | -1.41912500 |
| F | -2.88548900 | -1.64908500 | 0.00024100  |
| F | -0.61527400 | -0.69961900 | 1.22101500  |
| F | -2.91130400 | 0.80573500  | 1.41851600  |

<sup>3</sup>[Cp\*Co(SbF<sub>6</sub>)]<sup>+</sup>, -2612.80196432

|    |             |             |             |
|----|-------------|-------------|-------------|
| C  | 2.69209900  | -1.15126500 | 0.01191300  |
| C  | 3.06534300  | 0.00144000  | -0.76070000 |
| C  | 2.69100600  | 1.15193700  | 0.01454200  |
| C  | 2.09275100  | -0.69738700 | 1.29261700  |
| C  | 2.09212200  | 0.69447000  | 1.29425000  |
| Co | 0.89258700  | 0.00027800  | -0.59471100 |
| C  | 1.51955900  | -1.57358900 | 2.35812200  |
| H  | 1.64236100  | -2.63340600 | 2.13330400  |
| H  | 2.00506300  | -1.36635200 | 3.31829700  |
| H  | 0.45122400  | -1.36309400 | 2.48157300  |
| C  | 1.51822600  | 1.56773000  | 2.36177600  |
| H  | 0.44968800  | 1.35728200  | 2.48358800  |
| H  | 2.00269000  | 1.35743600  | 3.32180100  |
| H  | 1.64163700  | 2.62815800  | 2.14019400  |
| C  | 2.91057300  | 2.57936800  | -0.33784600 |
| H  | 2.01949100  | 3.18137400  | -0.13258600 |
| H  | 3.71647200  | 2.98438200  | 0.29011800  |
| H  | 3.19781800  | 2.71018900  | -1.38152400 |
| C  | 3.82366200  | 0.00327800  | -2.05843500 |
| H  | 3.59195200  | 0.88558700  | -2.65873800 |
| H  | 4.90261400  | 0.00333900  | -1.86808900 |
| H  | 3.59245300  | -0.87764500 | -2.66096600 |
| C  | 2.91281700  | -2.57763600 | -0.34404000 |
| H  | 3.71934800  | -2.98350200 | 0.28256500  |
| H  | 2.02238000  | -3.18096700 | -0.13988000 |
| H  | 3.19974700  | -2.70564000 | -1.38815600 |
| Sb | -2.16716900 | 0.00001700  | -0.10524400 |
| F  | -0.60558000 | 1.25027100  | -0.52712600 |
| F  | -1.34771700 | -0.00237400 | 1.59940300  |
| F  | -3.26694200 | 1.44047700  | 0.27348500  |
| F  | -2.42126200 | 0.00221400  | -1.95112400 |
| F  | -0.60590800 | -1.24952200 | -0.53021600 |
| F  | -3.26794000 | -1.44057800 | 0.27001600  |

<sup>5</sup>[Cp\*Co(SbF<sub>6</sub>)]<sup>+</sup>, -2612.7858382

|   |             |             |             |
|---|-------------|-------------|-------------|
| C | -2.64358800 | 1.17878900  | 0.07155300  |
| C | -3.05963700 | -0.00076200 | -0.67291000 |
| C | -2.64295700 | -1.17922100 | 0.07284000  |



|    |             |             |             |
|----|-------------|-------------|-------------|
| C  | -2.07427500 | 0.73631800  | 1.29534000  |
| C  | -2.07379400 | -0.73506300 | 1.29611700  |
| Co | -0.89147600 | -0.00012400 | -0.74360800 |
| C  | -1.48953000 | 1.56233700  | 2.38238700  |
| H  | -1.60988900 | 2.63063700  | 2.20308600  |
| H  | -1.96004300 | 1.31391500  | 3.34150100  |
| H  | -0.42123800 | 1.33611500  | 2.48743200  |
| C  | -1.48832400 | -1.55952800 | 2.38394000  |
| H  | -0.42020900 | -1.33229500 | 2.48868800  |
| H  | -1.95897700 | -1.31055200 | 3.34284300  |
| H  | -1.60780100 | -2.62810400 | 2.20569400  |
| C  | -2.88457600 | -2.60253100 | -0.33289400 |
| H  | -2.11552400 | -3.26670400 | 0.06650700  |
| H  | -3.85494600 | -2.94443600 | 0.04644000  |
| H  | -2.89920400 | -2.71928500 | -1.41901000 |
| C  | -3.86810700 | -0.00163800 | -1.92944700 |
| H  | -3.68663900 | -0.89119000 | -2.53674700 |
| H  | -4.93529400 | -0.00168700 | -1.66738000 |
| H  | -3.68697800 | 0.88728900  | -2.53776600 |
| C  | -2.88609300 | 2.60148300  | -0.33580700 |
| H  | -3.85705700 | 2.94292700  | 0.04242400  |
| H  | -2.11792700 | 3.26672400  | 0.06351200  |
| H  | -2.89998900 | 2.71713000  | -1.42205500 |
| Sb | 2.15177900  | 0.00002100  | -0.09091400 |
| F  | 0.61083200  | -1.24945900 | -0.56084500 |
| F  | 1.28107100  | 0.00168000  | 1.58877600  |
| F  | 3.24141200  | -1.43813800 | 0.32367800  |
| F  | 2.46117200  | -0.00175800 | -1.92901700 |
| F  | 0.61111700  | 1.24904100  | -0.56331700 |
| F  | 3.24174200  | 1.43871000  | 0.32096100  |

**8-Methylquionline, -441.436161643**

|   |             |             |             |
|---|-------------|-------------|-------------|
| C | -2.27039700 | -0.35543200 | 0.00001400  |
| C | -1.37827700 | 0.69893300  | -0.00000200 |
| C | 0.02297500  | 0.40518700  | -0.00003800 |
| C | 0.46334800  | -0.95818200 | -0.00000400 |
| C | -0.49530500 | -2.00498700 | 0.00001000  |
| C | -1.83651300 | -1.70403000 | 0.00001200  |
| H | -3.33689400 | -0.14597700 | 0.00002200  |
| C | 1.86116000  | -1.19469100 | -0.00000500 |
| H | -0.15265400 | -3.03641100 | 0.00001800  |
| H | -2.57490800 | -2.50049200 | 0.00002300  |
| C | 2.72899000  | -0.12830900 | -0.00001300 |
| C | 2.18994800  | 1.18184600  | 0.00003800  |

|   |             |             |             |
|---|-------------|-------------|-------------|
| H | 2.22763200  | -2.21829100 | -0.00001400 |
| H | 3.80472300  | -0.27241000 | -0.00004700 |
| H | 2.86270300  | 2.03894500  | -0.00004000 |
| N | 0.89943400  | 1.45180600  | -0.00000500 |
| C | -1.83577600 | 2.13318200  | 0.00000000  |
| H | -1.45019800 | 2.66606700  | 0.87471800  |
| H | -1.45020800 | 2.66606800  | -0.87472000 |
| H | -2.92715900 | 2.19875400  | 0.00000700  |

**Phenyl-1,4,2-dioxazol-5-one, -588.505106504**

|   |             |             |             |
|---|-------------|-------------|-------------|
| C | 0.64137400  | 0.28017800  | 0.00000000  |
| C | 2.75521400  | -0.31251300 | 0.00000600  |
| O | 3.75364300  | -0.96145300 | -0.00000900 |
| O | 1.46083800  | -0.80987800 | 0.00000000  |
| O | 2.64694600  | 1.04376600  | -0.00000500 |
| N | 1.27231200  | 1.40741800  | 0.00000100  |
| C | -0.80498700 | 0.09080100  | 0.00000100  |
| C | -1.34331300 | -1.20414500 | -0.00000200 |
| C | -1.65409300 | 1.21024300  | 0.00000500  |
| C | -2.72622600 | -1.37549100 | -0.00000200 |
| H | -0.68072600 | -2.06251400 | -0.00000500 |
| C | -3.03238800 | 1.02701900  | 0.00000600  |
| H | -1.22561800 | 2.20680900  | 0.00000700  |
| C | -3.57068800 | -0.26400500 | 0.00000300  |
| H | -3.14328900 | -2.37752300 | -0.00000400 |
| H | -3.68960800 | 1.89081300  | 0.00000900  |
| H | -4.64771600 | -0.40150300 | 0.00000300  |

**CO<sub>2</sub>, -188.668744516**

|   |            |            |             |
|---|------------|------------|-------------|
| C | 0.00000000 | 0.00000000 | 0.00000000  |
| O | 0.00000000 | 0.00000000 | 1.16914100  |
| O | 0.00000000 | 0.00000000 | -1.16914100 |

**PivOH, -347.195642288**

|   |             |             |             |
|---|-------------|-------------|-------------|
| C | -0.94248800 | 0.18792200  | -0.00005700 |
| C | 0.57315500  | -0.01035700 | 0.00002600  |
| O | -1.52295800 | 1.25160600  | -0.00009500 |
| O | -1.61299900 | -0.99509200 | -0.00006900 |
| H | -2.55765600 | -0.76725100 | -0.00011200 |
| C | 1.25194800  | 1.36609500  | -0.00000200 |
| H | 2.33964800  | 1.24335500  | 0.00006400  |
| H | 0.96559700  | 1.94516400  | -0.88174200 |
| H | 0.96549700  | 1.94524900  | 0.88165000  |
| C | 0.96882200  | -0.80602100 | -1.26302000 |

|   |            |             |             |
|---|------------|-------------|-------------|
| H | 2.05375600 | -0.95266400 | -1.27938700 |
| H | 0.48575900 | -1.78590800 | -1.28057300 |
| H | 0.68767200 | -0.26618100 | -2.17325300 |
| C | 0.96868400 | -0.80590100 | 1.26319300  |
| H | 2.05361600 | -0.95254500 | 1.27969300  |
| H | 0.68743500 | -0.26597300 | 2.17334300  |
| H | 0.48561800 | -1.78578500 | 1.28078600  |

**Product, -841.367657364**

|   |             |             |             |
|---|-------------|-------------|-------------|
| C | -3.16350600 | -1.91953100 | -1.29430600 |
| C | -3.66189800 | -0.64501800 | -1.42425800 |
| C | -3.15651900 | 0.40218800  | -0.60958000 |
| C | -2.13038000 | 0.11766400  | 0.34723200  |
| C | -1.63852100 | -1.21846700 | 0.47684000  |
| C | -2.15088000 | -2.20070900 | -0.34407200 |
| H | -4.39837900 | 1.98620800  | -1.41399100 |
| H | -3.54116700 | -2.72037700 | -1.92264900 |
| H | -4.43897600 | -0.42031300 | -2.14986600 |
| C | -3.61826600 | 1.73923900  | -0.69842300 |
| H | -1.76276600 | -3.21190700 | -0.26356400 |
| C | -2.05381500 | 2.32206000  | 1.02386200  |
| C | -3.07252500 | 2.70221200  | 0.11759900  |
| H | -1.60407300 | 3.07163400  | 1.67350100  |
| H | -3.40163800 | 3.73520900  | 0.07536900  |
| N | -1.59285700 | 1.09144600  | 1.14420500  |
| C | -0.56204400 | -1.52132200 | 1.50032600  |
| H | -0.30042400 | -2.57991500 | 1.47018000  |
| H | -0.92551000 | -1.27757400 | 2.50341500  |
| C | 1.64549100  | -1.24208400 | 0.45298900  |
| O | 1.70068300  | -2.41969300 | 0.10134400  |
| N | 0.65682900  | -0.76190700 | 1.26421100  |
| C | 2.69796400  | -0.24856200 | 0.04041400  |
| C | 2.45959000  | 1.13004700  | -0.04813200 |
| C | 3.95770300  | -0.74996100 | -0.31039000 |
| C | 3.47412400  | 1.99384900  | -0.46111100 |
| H | 1.47456300  | 1.53475200  | 0.16859900  |
| C | 4.97315600  | 0.11406600  | -0.71251700 |
| H | 4.11236300  | -1.82254000 | -0.26316900 |
| C | 4.73430700  | 1.48895200  | -0.78618700 |
| H | 3.27825800  | 3.05953500  | -0.53605700 |
| H | 5.94997900  | -0.28291300 | -0.97300000 |
| H | 5.52443300  | 2.16311300  | -1.10407100 |
| H | 0.57618300  | 0.22812000  | 1.44391400  |

12, -2561.06350769

|    |             |             |             |
|----|-------------|-------------|-------------|
| C  | 0.77561600  | 2.22904300  | -1.22732400 |
| C  | -0.53438600 | 2.25433400  | -0.67368600 |
| C  | -0.40372100 | 2.29974800  | 0.77347000  |
| C  | 1.71830000  | 2.18845900  | -0.14237300 |
| C  | 0.97827500  | 2.29946000  | 1.09411900  |
| Co | 0.51479100  | 0.54795200  | 0.03727000  |
| C  | 3.20779500  | 2.11436000  | -0.26984600 |
| H  | 3.49635000  | 1.62202400  | -1.20106900 |
| H  | 3.64814100  | 3.11800400  | -0.26840500 |
| H  | 3.64180500  | 1.55430500  | 0.56149600  |
| C  | 1.60092200  | 2.28357200  | 2.45316800  |
| H  | 2.28052200  | 1.43161300  | 2.54954700  |
| H  | 2.18464200  | 3.19750400  | 2.60738100  |
| H  | 0.85307700  | 2.22266000  | 3.24520400  |
| C  | -1.55820700 | 2.38313500  | 1.72224100  |
| H  | -1.27608400 | 2.09085900  | 2.73473300  |
| H  | -1.93579200 | 3.41124900  | 1.76062800  |
| H  | -2.38130400 | 1.74020000  | 1.40107000  |
| C  | -1.83264900 | 2.37987100  | -1.40942400 |
| H  | -2.62192500 | 1.79074100  | -0.93951300 |
| H  | -2.15332500 | 3.42821800  | -1.40658800 |
| H  | -1.75013200 | 2.05926500  | -2.44845500 |
| C  | 1.15268200  | 2.12619000  | -2.67112500 |
| H  | 1.80929300  | 2.95794600  | -2.94615200 |
| H  | 1.69774200  | 1.19424500  | -2.85338700 |
| H  | 0.28055600  | 2.15003000  | -3.32546100 |
| C  | 3.07593000  | -2.32195900 | -0.09692400 |
| C  | 2.35726600  | -3.51342700 | 0.58360900  |
| H  | 1.45008300  | -3.79199800 | 0.03747400  |
| H  | 3.02506000  | -4.37970400 | 0.59592200  |
| H  | 2.08527600  | -3.27171400 | 1.61469300  |
| C  | 3.44352200  | -2.67250000 | -1.54697800 |
| H  | 2.55810700  | -2.94067100 | -2.12873600 |
| H  | 3.93488400  | -1.83239700 | -2.04658300 |
| H  | 4.13166000  | -3.52250100 | -1.55334200 |
| C  | 4.33057300  | -1.93080700 | 0.71151600  |
| H  | 4.84838600  | -1.08243200 | 0.25171700  |
| H  | 4.07153200  | -1.66357900 | 1.73885300  |
| H  | 5.02560300  | -2.77483500 | 0.73715500  |
| C  | 2.10441900  | -1.16378500 | -0.06975600 |
| O  | 1.80060300  | -0.56008100 | 1.02222300  |
| O  | 1.49417500  | -0.73198400 | -1.10368200 |
| C  | -3.62103500 | -1.07356900 | -1.99773600 |

|   |             |             |             |
|---|-------------|-------------|-------------|
| C | -2.35334800 | -0.93614600 | -1.45402500 |
| C | -2.23611000 | -0.89055600 | -0.02774000 |
| C | -3.41088900 | -1.12270100 | 0.77044700  |
| C | -4.68251700 | -1.24823500 | 0.15387900  |
| C | -4.78802700 | -1.19828300 | -1.21357600 |
| H | -3.71570000 | -1.11338100 | -3.07901000 |
| C | -3.27278800 | -1.26150400 | 2.17215100  |
| H | -5.55499900 | -1.40492700 | 0.78083500  |
| H | -5.75389400 | -1.29546800 | -1.69830800 |
| C | -2.02745500 | -1.17886800 | 2.74623700  |
| C | -0.93782500 | -0.84825600 | 1.92478700  |
| H | -4.15680800 | -1.45208300 | 2.77415800  |
| H | -1.87169400 | -1.31770700 | 3.80986500  |
| H | 0.04168500  | -0.69876900 | 2.36218800  |
| N | -1.02263900 | -0.66229600 | 0.60501100  |
| C | -1.16213200 | -0.93576600 | -2.37350000 |
| H | -0.62093200 | 0.01035900  | -2.36676200 |
| H | -0.43752100 | -1.69726400 | -2.08060500 |
| H | -1.47867700 | -1.13278400 | -3.39991000 |

<sup>32</sup>, -2561.0635766

|    |             |            |             |
|----|-------------|------------|-------------|
| C  | 0.75301000  | 2.35481800 | -1.06806000 |
| C  | -0.55516200 | 2.41326300 | -0.59398400 |
| C  | -0.50675700 | 2.28088300 | 0.87763300  |
| C  | 1.63619000  | 2.17399300 | 0.10233500  |
| C  | 0.84244400  | 2.18655500 | 1.29039900  |
| Co | 0.39244300  | 0.39556300 | -0.06644000 |
| C  | 3.12251900  | 2.09956400 | 0.03632600  |
| H  | 3.44695400  | 1.54074300 | -0.84405600 |
| H  | 3.54265600  | 3.11134300 | -0.03459000 |
| H  | 3.53464500  | 1.62413000 | 0.92815500  |
| C  | 1.37459300  | 2.03103800 | 2.68403000  |
| H  | 1.99604000  | 1.13341000 | 2.75713200  |
| H  | 1.98728100  | 2.89354400 | 2.96622500  |
| H  | 0.56819300  | 1.94644100 | 3.41515100  |
| C  | -1.72310000 | 2.32421400 | 1.74019500  |
| H  | -1.52599900 | 1.95926800 | 2.74894000  |
| H  | -2.08270400 | 3.35800300 | 1.81946100  |
| H  | -2.53537600 | 1.73281000 | 1.30809200  |
| C  | -1.82139000 | 2.64226000 | -1.36010200 |
| H  | -2.56569800 | 1.86734000 | -1.15177800 |
| H  | -2.26490000 | 3.60432400 | -1.07911800 |
| H  | -1.64441600 | 2.65902900 | -2.43671100 |
| C  | 1.25401500  | 2.43251700 | -2.47577400 |

|   |             |             |             |
|---|-------------|-------------|-------------|
| H | 1.89494200  | 3.31092200  | -2.60975100 |
| H | 1.84942100  | 1.54555000  | -2.71560900 |
| H | 0.43517000  | 2.50065600  | -3.19413900 |
| C | 3.43460200  | -2.13358400 | -0.17301500 |
| C | 2.89298500  | -3.35124800 | -0.95789800 |
| H | 2.51742500  | -3.04986300 | -1.93921100 |
| H | 3.69628900  | -4.07994600 | -1.10212100 |
| H | 2.08373300  | -3.84600200 | -0.41028100 |
| C | 4.55670100  | -1.44844900 | -0.98290300 |
| H | 4.19369900  | -1.12398900 | -1.96129100 |
| H | 4.95366900  | -0.57710700 | -0.45076100 |
| H | 5.38164200  | -2.15088500 | -1.13393200 |
| C | 3.95098100  | -2.56781300 | 1.20618600  |
| H | 4.32123400  | -1.71228400 | 1.77826900  |
| H | 3.16213300  | -3.04650900 | 1.79202700  |
| H | 4.77216000  | -3.28025900 | 1.08417800  |
| C | 2.28383000  | -1.14960000 | -0.02055400 |
| O | 1.79026400  | -0.82781400 | 1.09746700  |
| O | 1.76616300  | -0.61068900 | -1.07562600 |
| C | -3.66361200 | -1.06653600 | -2.10225700 |
| C | -2.42710100 | -0.89865500 | -1.50115400 |
| C | -2.36202500 | -0.96367800 | -0.07461400 |
| C | -3.54216900 | -1.29369500 | 0.67218100  |
| C | -4.78267100 | -1.44632900 | 0.00119100  |
| C | -4.84311100 | -1.31498500 | -1.36496300 |
| H | -3.72410700 | -1.02946300 | -3.18617700 |
| C | -3.42764700 | -1.48760700 | 2.07042500  |
| H | -5.66845100 | -1.68394300 | 0.58234000  |
| H | -5.78597500 | -1.43427400 | -1.88844700 |
| C | -2.20148000 | -1.36815000 | 2.68250000  |
| C | -1.09914200 | -0.97633800 | 1.90440100  |
| H | -4.31428900 | -1.74706500 | 2.64211100  |
| H | -2.07071100 | -1.54207000 | 3.74431800  |
| H | -0.12535200 | -0.82715600 | 2.35611400  |
| N | -1.17087700 | -0.74690400 | 0.59233000  |
| C | -1.19257100 | -0.73023900 | -2.35034000 |
| H | -0.81097700 | 0.29700400  | -2.34269900 |
| H | -0.37999500 | -1.38651900 | -2.02778700 |
| H | -1.41314900 | -0.96423300 | -3.39430500 |

<sup>52</sup>, -2561.04439083

|   |             |            |             |
|---|-------------|------------|-------------|
| C | 0.59890500  | 2.29632400 | -1.09459200 |
| C | -0.75499400 | 2.40655600 | -0.61482200 |
| C | -0.73944500 | 2.35154000 | 0.83454400  |

|    |             |             |             |
|----|-------------|-------------|-------------|
| C  | 1.43895600  | 2.26357500  | 0.05364500  |
| C  | 0.58756300  | 2.26253500  | 1.25218800  |
| Co | 0.44658300  | 0.19723600  | -0.24672100 |
| C  | 2.93046100  | 2.29042800  | 0.07469900  |
| H  | 3.35304200  | 1.96353000  | -0.87735900 |
| H  | 3.28467200  | 3.31197600  | 0.26577800  |
| H  | 3.32079700  | 1.65097600  | 0.87006700  |
| C  | 1.12824000  | 2.15590100  | 2.64073800  |
| H  | 1.75344000  | 1.26112300  | 2.73766400  |
| H  | 1.75973500  | 3.01937900  | 2.88073600  |
| H  | 0.33262800  | 2.10813100  | 3.38663700  |
| C  | -1.97941500 | 2.36763800  | 1.67161200  |
| H  | -1.76123200 | 2.20281500  | 2.72803100  |
| H  | -2.49770600 | 3.32972100  | 1.58429400  |
| H  | -2.68482800 | 1.59396500  | 1.34761800  |
| C  | -1.99426100 | 2.56455500  | -1.42879200 |
| H  | -2.72880600 | 1.78611100  | -1.19011600 |
| H  | -2.47240200 | 3.52556500  | -1.20159000 |
| H  | -1.79508800 | 2.53483500  | -2.50110500 |
| C  | 1.06473000  | 2.42028600  | -2.51920600 |
| H  | 1.35511400  | 3.45143100  | -2.74985700 |
| H  | 1.92783000  | 1.77623200  | -2.70604300 |
| H  | 0.28324900  | 2.13193000  | -3.22625100 |
| C  | 3.73340600  | -1.93652300 | -0.04980400 |
| C  | 3.40720700  | -3.30178200 | -0.69688800 |
| H  | 3.03046400  | -3.17367700 | -1.71443900 |
| H  | 4.31417900  | -3.91233600 | -0.73457200 |
| H  | 2.65830100  | -3.84714000 | -0.11280500 |
| C  | 4.78116200  | -1.18902300 | -0.90796200 |
| H  | 4.41922800  | -1.04060200 | -1.92825900 |
| H  | 5.02297200  | -0.21190200 | -0.47607000 |
| H  | 5.70372300  | -1.77554700 | -0.94685000 |
| C  | 4.24582100  | -2.12371800 | 1.38529800  |
| H  | 4.46756800  | -1.16231000 | 1.85670700  |
| H  | 3.50865400  | -2.64009400 | 2.00604000  |
| H  | 5.16288100  | -2.71979300 | 1.37242500  |
| C  | 2.46400300  | -1.10381200 | -0.05826100 |
| O  | 1.95021500  | -0.62084500 | 1.00235100  |
| O  | 1.87028900  | -0.84765900 | -1.17741300 |
| C  | -3.70244800 | -1.29581600 | -2.03721000 |
| C  | -2.47054300 | -1.03398400 | -1.46390700 |
| C  | -2.37568300 | -1.04924500 | -0.03918500 |
| C  | -3.52162000 | -1.40195200 | 0.74620500  |
| C  | -4.76102500 | -1.65835500 | 0.10399000  |

|   |             |             |             |
|---|-------------|-------------|-------------|
| C | -4.85005000 | -1.59193900 | -1.26540500 |
| H | -3.78717700 | -1.29183600 | -3.12007500 |
| C | -3.37094300 | -1.50337600 | 2.15031800  |
| H | -5.62410200 | -1.91560200 | 0.71033600  |
| H | -5.79293700 | -1.78788500 | -1.76510300 |
| C | -2.14469400 | -1.26740600 | 2.73101900  |
| C | -1.07755700 | -0.87429600 | 1.90740200  |
| H | -4.22997700 | -1.77886100 | 2.75563400  |
| H | -1.99059700 | -1.35875500 | 3.79991800  |
| H | -0.10442300 | -0.64481900 | 2.32879800  |
| N | -1.18424000 | -0.74434000 | 0.58413500  |
| C | -1.25673600 | -0.80530800 | -2.32567600 |
| H | -0.82535300 | 0.19695300  | -2.18602800 |
| H | -0.47077100 | -1.54314700 | -2.13465800 |
| H | -1.51141200 | -0.86414200 | -3.38617600 |

**MECP3, -2561.05688814**

|   |             |             |             |
|---|-------------|-------------|-------------|
| C | -2.49939400 | -1.53404600 | -0.63277300 |
| C | -2.64436100 | -0.31172500 | -1.31547700 |
| C | -2.79827200 | 0.72480800  | -0.30990700 |
| C | -2.89860200 | 0.09834300  | 0.98602100  |
| C | -2.63478600 | -1.27284700 | 0.80196100  |
| C | 4.38003100  | -1.42356100 | -1.25706500 |
| C | 4.32621600  | -1.41800400 | 0.11434600  |
| C | 3.07177900  | -1.37474900 | 0.77232300  |
| C | 1.86078200  | -1.30169300 | 0.00631500  |
| C | 1.93064700  | -1.38658500 | -1.41607400 |
| C | 3.18244900  | -1.43233900 | -2.00449600 |
| H | 3.90217000  | -1.48060600 | 2.76392800  |
| H | 5.33402100  | -1.45396900 | -1.77199700 |
| H | 5.22978100  | -1.45713800 | 0.71430700  |
| C | 2.98748300  | -1.41244100 | 2.18288600  |
| H | 3.24210000  | -1.49656100 | -3.08669800 |
| C | 0.62220600  | -1.20950700 | 1.99411200  |
| C | 1.75861300  | -1.36740300 | 2.79793200  |
| H | -0.34425200 | -1.07256400 | 2.46175500  |
| H | 1.65290000  | -1.40393900 | 3.87497500  |
| N | 0.65035500  | -1.16997200 | 0.66165200  |
| C | 0.70359800  | -1.47586500 | -2.28067100 |
| H | -0.04158900 | -2.13523600 | -1.83530700 |
| H | 0.25563700  | -0.49541700 | -2.44945400 |
| H | 0.96597200  | -1.89050200 | -3.25600700 |
| C | 0.35235200  | 1.88014700  | 0.01865400  |
| C | 1.35490300  | 3.01414600  | -0.00249400 |



|                                                |             |             |             |
|------------------------------------------------|-------------|-------------|-------------|
| O                                              | -0.18291700 | 1.45666400  | 1.09116500  |
| O                                              | 0.06563500  | 1.23024100  | -1.05231300 |
| C                                              | -2.98871700 | 2.17873900  | -0.58620000 |
| H                                              | -2.69678800 | 2.78478000  | 0.27374300  |
| H                                              | -2.40009200 | 2.49852900  | -1.44811800 |
| H                                              | -4.04414000 | 2.38397900  | -0.80168900 |
| C                                              | -2.60494500 | -0.06446200 | -2.78895300 |
| H                                              | -3.60143000 | 0.20762700  | -3.15276500 |
| H                                              | -1.92783900 | 0.75904500  | -3.03046700 |
| H                                              | -2.27698700 | -0.94788400 | -3.33887800 |
| C                                              | -2.38153400 | -2.90712200 | -1.21135100 |
| H                                              | -3.33609000 | -3.43538900 | -1.09572400 |
| H                                              | -2.14302500 | -2.88744400 | -2.27512200 |
| H                                              | -1.62072400 | -3.50282000 | -0.69822600 |
| C                                              | -2.60683500 | -2.34890000 | 1.83796100  |
| H                                              | -3.51208900 | -2.96261900 | 1.75809300  |
| H                                              | -1.75267000 | -3.01745700 | 1.70070700  |
| H                                              | -2.57128200 | -1.94559200 | 2.85154100  |
| C                                              | -3.09823400 | 0.83336500  | 2.27143100  |
| H                                              | -4.08003400 | 1.31787500  | 2.28174400  |
| H                                              | -3.04881200 | 0.16515500  | 3.13301000  |
| H                                              | -2.33803000 | 1.60989300  | 2.39593500  |
| Co                                             | -0.94798000 | -0.14006100 | -0.02572200 |
| C                                              | 1.04951700  | 4.00642400  | 1.12991600  |
| H                                              | 1.80744300  | 4.79431000  | 1.14286200  |
| H                                              | 0.07397400  | 4.48068100  | 0.98574700  |
| H                                              | 1.04633700  | 3.50968900  | 2.10226200  |
| C                                              | 1.33762100  | 3.71437700  | -1.36995300 |
| H                                              | 2.09441300  | 4.50331700  | -1.38693100 |
| H                                              | 1.55034300  | 3.01161800  | -2.17789500 |
| H                                              | 0.36522100  | 4.17654300  | -1.56576500 |
| C                                              | 2.73232900  | 2.34214800  | 0.23096800  |
| H                                              | 3.51544700  | 3.10516000  | 0.21549200  |
| H                                              | 2.76156600  | 1.83711200  | 1.20097800  |
| H                                              | 2.95071400  | 1.60853600  | -0.55038000 |
| <sup>1</sup> TS2_3_CMD, -2561.04743727, i27.76 |             |             |             |
| C                                              | -1.28869300 | -2.27016300 | -1.04506500 |
| C                                              | 0.04717900  | -2.70093000 | -0.64298500 |
| C                                              | 0.13124200  | -2.59983500 | 0.76538800  |
| C                                              | -2.00814700 | -1.90494600 | 0.11552100  |
| C                                              | -1.11482600 | -2.03955300 | 1.24904500  |
| C                                              | -3.43751800 | -1.47032900 | 0.17865700  |
| H                                              | -3.74192000 | -0.96732200 | -0.74000000 |
| H                                              | -4.08126900 | -2.34789700 | 0.31786200  |

|   |             |             |             |
|---|-------------|-------------|-------------|
| H | -3.61227800 | -0.79303500 | 1.01637000  |
| C | -1.50798800 | -1.80889600 | 2.67520500  |
| H | -2.00574700 | -0.84275000 | 2.79577100  |
| H | -2.21356000 | -2.58477800 | 2.99653400  |
| H | -0.65242800 | -1.85022900 | 3.35230700  |
| C | 1.29704600  | -3.01379600 | 1.60713000  |
| H | 1.38333700  | -2.41949300 | 2.51880300  |
| H | 1.16823600  | -4.05989000 | 1.91211000  |
| H | 2.24013400  | -2.94445400 | 1.06099100  |
| C | 1.09471200  | -3.30210300 | -1.53369300 |
| H | 2.10136400  | -2.96356600 | -1.27327700 |
| H | 1.08252900  | -4.39420200 | -1.43404200 |
| H | 0.92037800  | -3.07706200 | -2.58727100 |
| C | -1.82388100 | -2.22313000 | -2.44228700 |
| H | -2.52068200 | -3.05515400 | -2.60077300 |
| H | -2.36013200 | -1.28742000 | -2.61649500 |
| H | -1.03305600 | -2.30948900 | -3.18946800 |
| C | -2.70764500 | 2.73013300  | 0.01191200  |
| C | -1.63398500 | 3.82056600  | 0.24066400  |
| H | -1.05079700 | 3.99858700  | -0.66919500 |
| H | -2.11683700 | 4.76349900  | 0.51656100  |
| H | -0.94768300 | 3.53934200  | 1.04442600  |
| C | -3.65911200 | 3.15951600  | -1.11641400 |
| H | -3.11873900 | 3.32193200  | -2.05155600 |
| H | -4.42422100 | 2.40032600  | -1.30347200 |
| H | -4.16396200 | 4.09053200  | -0.83975300 |
| C | -3.49702400 | 2.50136800  | 1.31703200  |
| H | -4.26613100 | 1.73148300  | 1.18863900  |
| H | -2.83801300 | 2.20016200  | 2.13517200  |
| H | -4.00523600 | 3.42557700  | 1.60974400  |
| C | -1.97249200 | 1.44029100  | -0.39859000 |
| O | -1.27499100 | 0.86727700  | 0.55641900  |
| O | -1.99926800 | 0.99044900  | -1.55114700 |
| C | 3.36947200  | 1.09113100  | -2.19710900 |
| C | 2.27937400  | 0.64047400  | -1.47165900 |
| C | 2.35879100  | 0.66536600  | -0.04927500 |
| C | 3.53000000  | 1.19955600  | 0.58541500  |
| C | 4.62519900  | 1.62563200  | -0.20796400 |
| C | 4.54764100  | 1.56330400  | -1.57868400 |
| H | 3.31006300  | 1.09324500  | -3.28196600 |
| C | 3.54309500  | 1.31708700  | 1.99573900  |
| H | 5.50903500  | 2.01706100  | 0.28630600  |
| H | 5.37703100  | 1.89798900  | -2.19288700 |
| C | 2.43679600  | 0.94611500  | 2.72358300  |

|    |             |             |             |
|----|-------------|-------------|-------------|
| C  | 1.33372400  | 0.40567000  | 2.04078700  |
| H  | 4.42369000  | 1.72323500  | 2.48510400  |
| H  | 2.39553400  | 1.05580100  | 3.80112800  |
| H  | 0.44418300  | 0.11480600  | 2.58548800  |
| N  | 1.30168500  | 0.22654100  | 0.72348200  |
| C  | 1.04731100  | 0.17082700  | -2.19934200 |
| H  | 1.10871900  | -0.88354100 | -2.47219200 |
| H  | 0.08803500  | 0.37480800  | -1.67784100 |
| H  | 0.91102800  | 0.73035400  | -3.13013300 |
| Co | -0.30259100 | -0.65948800 | -0.01509700 |

**13\_CMD, -2561.04838316**

|   |             |             |             |
|---|-------------|-------------|-------------|
| C | 2.51490100  | -1.47550500 | 0.85338200  |
| C | 2.72887600  | -0.05095600 | 1.07822700  |
| C | 2.73058800  | 0.59921100  | -0.17767300 |
| C | 2.45170200  | -0.39570900 | -1.19278000 |
| C | 2.39604200  | -1.68697300 | -0.54001800 |
| C | -4.22622800 | -1.16556200 | 1.67286200  |
| C | -4.29073400 | -1.58123400 | 0.36451000  |
| C | -3.10837700 | -1.66065000 | -0.41681100 |
| C | -1.85405000 | -1.30925100 | 0.17352100  |
| C | -1.79991800 | -0.91329400 | 1.53833400  |
| C | -2.97872400 | -0.83846900 | 2.25447900  |
| H | -4.06792300 | -2.33443000 | -2.23721100 |
| H | -5.12877300 | -1.09218800 | 2.27037200  |
| H | -5.23955700 | -1.84457100 | -0.09265600 |
| C | -3.12445300 | -2.06014300 | -1.77426100 |
| H | -2.94606800 | -0.52691700 | 3.29437700  |
| C | -0.76212900 | -1.68644200 | -1.85626200 |
| C | -1.95090500 | -2.08306700 | -2.49230000 |
| H | 0.16010300  | -1.63797500 | -2.41697500 |
| H | -1.92395700 | -2.37409200 | -3.53598300 |
| N | -0.69793300 | -1.32653800 | -0.57902600 |
| C | -0.47196900 | -0.63437100 | 2.18139300  |
| H | 0.11962600  | -1.54484600 | 2.29036500  |
| H | 0.09267800  | 0.19924000  | 1.68741800  |
| H | -0.58776100 | -0.19783000 | 3.17692300  |
| C | -0.22212200 | 2.19062000  | 0.18715900  |
| C | -1.12625500 | 3.27372500  | -0.42304000 |
| O | -0.03122200 | 1.16008800  | -0.60544900 |
| O | 0.24659600  | 2.26723200  | 1.32721800  |
| C | 2.93888400  | 2.05586000  | -0.43394700 |
| H | 2.36542500  | 2.38338700  | -1.30277200 |
| H | 2.63119700  | 2.65451900  | 0.42327200  |

|    |             |             |             |
|----|-------------|-------------|-------------|
| H  | 4.00037800  | 2.24479000  | -0.63357100 |
| C  | 2.89493000  | 0.62549600  | 2.40237000  |
| H  | 3.94369900  | 0.90719000  | 2.54919200  |
| H  | 2.28235200  | 1.52926700  | 2.44049000  |
| H  | 2.60510800  | -0.02508700 | 3.22945900  |
| C  | 2.52684100  | -2.55439900 | 1.89209200  |
| H  | 3.52791300  | -2.99695000 | 1.95736500  |
| H  | 2.27629700  | -2.17340400 | 2.88382500  |
| H  | 1.82877400  | -3.35846000 | 1.64373700  |
| C  | 2.22006100  | -3.02511700 | -1.18826700 |
| H  | 3.12044700  | -3.62733100 | -1.02462600 |
| H  | 1.37592400  | -3.57184700 | -0.75895900 |
| H  | 2.06886200  | -2.94762700 | -2.26548000 |
| C  | 2.36399400  | -0.09241900 | -2.65565700 |
| H  | 3.30792800  | 0.33652500  | -3.00858500 |
| H  | 2.16369700  | -0.98274000 | -3.25456600 |
| H  | 1.57388900  | 0.64167400  | -2.84035900 |
| Co | 0.88045300  | -0.34103400 | 0.09051200  |
| C  | -0.55319600 | 3.70625900  | -1.78760600 |
| H  | -1.19533700 | 4.47009600  | -2.23715200 |
| H  | 0.44757000  | 4.13842600  | -1.67556800 |
| H  | -0.49067200 | 2.85860500  | -2.47490800 |
| C  | -1.20755900 | 4.47453700  | 0.52928100  |
| H  | -1.86145000 | 5.24233500  | 0.10394000  |
| H  | -1.60376800 | 4.17863000  | 1.50357600  |
| H  | -0.22008500 | 4.91427500  | 0.69413600  |
| C  | -2.52479700 | 2.64390000  | -0.61615000 |
| H  | -3.21400200 | 3.38593100  | -1.03157700 |
| H  | -2.47840900 | 1.79070400  | -1.29851900 |
| H  | -2.93621000 | 2.29955200  | 0.33922600  |

<sup>1</sup>TS4\_CMD, -2561.02798868, i1213.57

|   |             |             |             |
|---|-------------|-------------|-------------|
| C | -1.96880700 | -2.07245100 | -0.80679800 |
| C | -2.50235800 | -0.77927800 | -1.18315700 |
| C | -2.73104500 | -0.04095200 | 0.00585900  |
| C | -2.33355000 | -0.86102100 | 1.13313100  |
| C | -1.92367600 | -2.13041500 | 0.61857300  |
| C | 4.34490800  | -0.30676300 | -1.69528600 |
| C | 4.54768600  | -0.75152900 | -0.40794700 |
| C | 3.43548800  | -1.05584400 | 0.41972200  |
| C | 2.12379200  | -0.90714600 | -0.12055200 |
| C | 1.92426600  | -0.48344000 | -1.45937000 |
| C | 3.03570700  | -0.17224400 | -2.21923100 |
| H | 4.53619900  | -1.59235700 | 2.20813500  |

|    |             |             |             |
|----|-------------|-------------|-------------|
| H  | 5.19439400  | -0.05884200 | -2.32348700 |
| H  | 5.55004700  | -0.85714300 | -0.00469200 |
| C  | 3.55030000  | -1.46339000 | 1.77083400  |
| H  | 2.90393400  | 0.17135200  | -3.24114900 |
| C  | 1.15361400  | -1.46931100 | 1.92467400  |
| C  | 2.41293200  | -1.66886100 | 2.52113800  |
| H  | 0.24640600  | -1.57219300 | 2.50458100  |
| H  | 2.46458200  | -1.96176000 | 3.56349300  |
| N  | 1.00642600  | -1.12626300 | 0.65068700  |
| C  | 0.51075100  | -0.42317600 | -1.94472100 |
| H  | 0.13328900  | -1.42823500 | -2.13615100 |
| H  | -0.10995300 | 0.72460200  | -1.52416200 |
| H  | 0.44003300  | 0.08234000  | -2.91509300 |
| C  | -0.16661500 | 2.17604400  | -0.11104000 |
| C  | 0.11140500  | 3.56628900  | 0.45033100  |
| O  | -0.26242200 | 1.18596500  | 0.68911300  |
| O  | -0.25974100 | 2.01728900  | -1.36892400 |
| C  | -3.28305100 | 1.34571300  | 0.10527400  |
| H  | -2.89973900 | 1.85624100  | 0.99050600  |
| H  | -3.02884300 | 1.94299200  | -0.77229800 |
| H  | -4.37562900 | 1.30749400  | 0.18413800  |
| C  | -2.76689000 | -0.30273500 | -2.57764700 |
| H  | -3.80739600 | -0.50798800 | -2.85386600 |
| H  | -2.59990500 | 0.77297000  | -2.66652400 |
| H  | -2.12592700 | -0.80615700 | -3.30413100 |
| C  | -1.66160800 | -3.21949600 | -1.72105800 |
| H  | -2.50068400 | -3.92487600 | -1.73697500 |
| H  | -1.49517800 | -2.89181300 | -2.74926900 |
| H  | -0.77612300 | -3.76935500 | -1.38995700 |
| C  | -1.50698700 | -3.34166800 | 1.39344000  |
| H  | -2.24044900 | -4.13990000 | 1.23381100  |
| H  | -0.53647500 | -3.71926000 | 1.05994000  |
| H  | -1.45601700 | -3.15261200 | 2.46645600  |
| C  | -2.40942200 | -0.42109200 | 2.56294800  |
| H  | -3.44658900 | -0.21720800 | 2.84932000  |
| H  | -2.02259000 | -1.17964100 | 3.24638600  |
| H  | -1.83299500 | 0.49798400  | 2.70634800  |
| Co | -0.69370100 | -0.52558300 | -0.12248100 |
| C  | -0.08486300 | 3.59393900  | 1.97297300  |
| H  | 0.13295300  | 4.59646500  | 2.35216300  |
| H  | -1.11591900 | 3.34709500  | 2.24583400  |
| H  | 0.57656700  | 2.88280800  | 2.47377600  |
| C  | -0.82872100 | 4.57608900  | -0.23826900 |
| H  | -0.60430300 | 5.58571800  | 0.11777900  |

|   |             |            |             |
|---|-------------|------------|-------------|
| H | -0.70535300 | 4.55215400 | -1.32301700 |
| H | -1.87750900 | 4.36368400 | -0.00463600 |
| C | 1.58338700  | 3.88478600 | 0.09127100  |
| H | 1.83980100  | 4.88293200 | 0.45856000  |
| H | 2.26732100  | 3.16607500 | 0.55526500  |
| H | 1.73443200  | 3.86271100 | -0.99098300 |

<sup>3</sup>TS4\_CMD, -2561.01116768, i1401.66

|   |             |             |             |
|---|-------------|-------------|-------------|
| C | -2.72338900 | -1.21883100 | -0.92375300 |
| C | -2.86316500 | 0.24964100  | -0.99604800 |
| C | -2.77608800 | 0.74123200  | 0.29843100  |
| C | -2.54740200 | -0.40411000 | 1.20461000  |
| C | -2.60680100 | -1.60735900 | 0.44267300  |
| C | 4.20539200  | -0.71130500 | -1.70941400 |
| C | 4.35923100  | -1.38128600 | -0.51637700 |
| C | 3.21496400  | -1.74591000 | 0.24107000  |
| C | 1.92239200  | -1.40820400 | -0.25753400 |
| C | 1.77086100  | -0.75988700 | -1.51883600 |
| C | 2.91604400  | -0.40613700 | -2.20932400 |
| H | 4.25259600  | -2.69280700 | 1.89078300  |
| H | 5.07799500  | -0.42174000 | -2.28600900 |
| H | 5.34597400  | -1.63079100 | -0.13849200 |
| C | 3.28264300  | -2.41430300 | 1.48835200  |
| H | 2.82487800  | 0.10466200  | -3.16356800 |
| C | 0.89177000  | -2.29115200 | 1.63762300  |
| C | 2.12494000  | -2.69861300 | 2.18170400  |
| H | -0.03486400 | -2.46002000 | 2.17641100  |
| H | 2.14712400  | -3.20830700 | 3.13819600  |
| N | 0.78759400  | -1.67113600 | 0.46914900  |
| C | 0.38474300  | -0.47887800 | -2.00147600 |
| H | -0.19124400 | -1.40855100 | -2.10867800 |
| H | 0.03995900  | 0.78069900  | -1.53181500 |
| H | 0.37492800  | -0.03294800 | -3.00095100 |
| C | 0.42056000  | 2.03822500  | 0.01763600  |
| C | 1.16219900  | 3.22740600  | 0.62066600  |
| O | 0.08332700  | 1.06156000  | 0.76407200  |
| O | 0.20849400  | 2.02155800  | -1.24012100 |
| C | -2.84868500 | 2.16201300  | 0.75466600  |
| H | -2.09857100 | 2.36096100  | 1.52388100  |
| H | -2.68415400 | 2.85728600  | -0.07083000 |
| H | -3.83295600 | 2.37893400  | 1.18653600  |
| C | -3.05855400 | 1.02001000  | -2.26415400 |
| H | -4.10376200 | 0.97059800  | -2.59164200 |
| H | -2.79128500 | 2.07037100  | -2.13733800 |

|    |             |             |             |
|----|-------------|-------------|-------------|
| H  | -2.44406000 | 0.61614600  | -3.07367200 |
| C  | -2.86227900 | -2.15069300 | -2.08369400 |
| H  | -3.92265300 | -2.38874800 | -2.23931600 |
| H  | -2.49118700 | -1.70909000 | -3.01130700 |
| H  | -2.33867800 | -3.09396600 | -1.90821400 |
| C  | -2.55505600 | -3.02341600 | 0.94115400  |
| H  | -3.50256000 | -3.53478900 | 0.74063800  |
| H  | -1.76121700 | -3.59745600 | 0.45303000  |
| H  | -2.38601800 | -3.06452000 | 2.01889800  |
| C  | -2.37164000 | -0.25641200 | 2.67937500  |
| H  | -3.28198500 | 0.15410800  | 3.13238000  |
| H  | -2.15119400 | -1.20771500 | 3.16639300  |
| H  | -1.55622500 | 0.44261200  | 2.89278400  |
| Co | -0.82189000 | -0.45616700 | -0.16714700 |
| C  | 1.04407300  | 3.23056200  | 2.15131800  |
| H  | 1.60691500  | 4.07460300  | 2.56026700  |
| H  | 0.00209200  | 3.33681100  | 2.47004000  |
| H  | 1.43810200  | 2.30801400  | 2.58398200  |
| C  | 0.60198100  | 4.53404300  | 0.02676600  |
| H  | 1.17026400  | 5.38516600  | 0.41311000  |
| H  | 0.67057200  | 4.53309300  | -1.06296600 |
| H  | -0.44735700 | 4.67671000  | 0.30638900  |
| C  | 2.64185400  | 3.04315300  | 0.19729200  |
| H  | 3.23926800  | 3.86857000  | 0.59583500  |
| H  | 3.05138700  | 2.10539700  | 0.58776700  |
| H  | 2.73770400  | 3.03748600  | -0.89154600 |

<sup>5</sup>TS4\_CMD, -2560.99849041, *i*1338.72

|   |             |             |             |
|---|-------------|-------------|-------------|
| C | 1.45632600  | -2.54160900 | 0.75019900  |
| C | 2.31554200  | -1.51028200 | 1.34899400  |
| C | 2.93002900  | -0.81446700 | 0.31620600  |
| C | 2.48434600  | -1.38337100 | -0.94465700 |
| C | 1.51149500  | -2.41123400 | -0.66685700 |
| C | -4.47503900 | 1.03036000  | 1.75091900  |
| C | -4.89311000 | 0.62222300  | 0.50436900  |
| C | -3.98250400 | -0.04248300 | -0.35703000 |
| C | -2.64727300 | -0.27399600 | 0.09477000  |
| C | -2.23474500 | 0.10254400  | 1.40817700  |
| C | -3.15871600 | 0.76499200  | 2.19933300  |
| H | -5.33430700 | -0.32424100 | -2.02351400 |
| H | -5.16335100 | 1.54762900  | 2.41164900  |
| H | -5.90773800 | 0.80494900  | 0.16461000  |
| C | -4.32273700 | -0.48029300 | -1.65919100 |
| H | -2.87030300 | 1.07462700  | 3.19974300  |

|    |             |             |             |
|----|-------------|-------------|-------------|
| C  | -2.07221900 | -1.24793700 | -1.95884100 |
| C  | -3.37660200 | -1.09276700 | -2.45675600 |
| H  | -1.29013000 | -1.69093900 | -2.56730600 |
| H  | -3.61326100 | -1.43664900 | -3.45699100 |
| N  | -1.71843400 | -0.85596300 | -0.73703200 |
| C  | -0.84240300 | -0.22326500 | 1.84887800  |
| H  | -0.71444600 | -1.31666600 | 1.91233300  |
| H  | 0.08455800  | 0.81001400  | 1.44444700  |
| H  | -0.65627800 | 0.12198200  | 2.87066600  |
| C  | 0.89456400  | 2.02221400  | 0.00757700  |
| C  | 1.26860200  | 3.41039400  | -0.49905700 |
| O  | 0.79322400  | 1.05317500  | -0.81403100 |
| O  | 0.64611600  | 1.87930300  | 1.25377300  |
| C  | 3.86625300  | 0.34748800  | 0.40940400  |
| H  | 3.58876000  | 1.12350600  | -0.31074800 |
| H  | 3.86442400  | 0.79397900  | 1.40530600  |
| H  | 4.89523800  | 0.04758800  | 0.17714100  |
| C  | 2.46049700  | -1.30041600 | 2.82184400  |
| H  | 1.48454800  | -1.23488700 | 3.31426000  |
| H  | 2.99760500  | -2.13683000 | 3.28552700  |
| H  | 3.01069400  | -0.38529200 | 3.04649400  |
| C  | 0.74571900  | -3.61401100 | 1.50807200  |
| H  | 1.39811700  | -4.49283000 | 1.60438100  |
| H  | 0.48382200  | -3.29712600 | 2.52051800  |
| H  | -0.16237200 | -3.94399500 | 0.99587300  |
| C  | 0.94051800  | -3.38680600 | -1.66258300 |
| H  | 1.59224100  | -4.26077000 | -1.77696100 |
| H  | -0.04219800 | -3.74973500 | -1.34914500 |
| H  | 0.82921800  | -2.93318700 | -2.65091300 |
| C  | 2.92543200  | -0.89870500 | -2.28040100 |
| H  | 4.01873200  | -0.84587800 | -2.33045000 |
| H  | 2.57311300  | -1.53464600 | -3.09422300 |
| H  | 2.54902200  | 0.11956300  | -2.44419700 |
| Co | 0.19165700  | -0.68355800 | -0.06109600 |
| C  | 1.85876500  | 3.33483700  | -1.91507100 |
| H  | 2.09123800  | 4.34319400  | -2.26904000 |
| H  | 2.78650800  | 2.75341100  | -1.93123600 |
| H  | 1.15819700  | 2.87489600  | -2.61602100 |
| C  | 2.27065800  | 4.05989700  | 0.47599300  |
| H  | 2.49681700  | 5.07666100  | 0.14214100  |
| H  | 1.86287100  | 4.10684200  | 1.48765000  |
| H  | 3.21103400  | 3.50018700  | 0.50981900  |
| C  | -0.05099500 | 4.22314600  | -0.51363700 |
| H  | 0.15368700  | 5.24077300  | -0.85913100 |



|   |             |            |             |
|---|-------------|------------|-------------|
| H | -0.78395100 | 3.77533900 | -1.19304500 |
| H | -0.48696200 | 4.27779200 | 0.48733700  |

<sup>15</sup>\_CMD, -2561.045748

|   |             |             |             |
|---|-------------|-------------|-------------|
| C | -2.90869800 | -0.92185900 | -0.42405600 |
| C | -2.80038400 | 0.28651600  | -1.19544800 |
| C | -2.48996500 | 1.33874700  | -0.28995400 |
| C | -2.56442200 | 0.81407600  | 1.06606700  |
| C | -2.85539600 | -0.55768600 | 0.97921300  |
| C | 3.53627900  | -1.75553600 | -1.88057900 |
| C | 3.61205600  | -2.35296600 | -0.64062800 |
| C | 2.48573700  | -2.33369700 | 0.22387000  |
| C | 1.29973400  | -1.70128300 | -0.23855700 |
| C | 1.20517700  | -1.14422700 | -1.53774300 |
| C | 2.33590900  | -1.15222900 | -2.33288400 |
| H | 3.35231000  | -3.36368900 | 1.92574400  |
| H | 4.40434300  | -1.75551400 | -2.53233100 |
| H | 4.53055400  | -2.82384900 | -0.30408300 |
| C | 2.47102200  | -2.85987400 | 1.53914800  |
| H | 2.30072200  | -0.71230000 | -3.32551000 |
| C | 0.23208400  | -2.01195300 | 1.80285900  |
| C | 1.34511800  | -2.70789600 | 2.31885800  |
| H | -0.63615000 | -1.83096100 | 2.42210100  |
| H | 1.30473700  | -3.08942700 | 3.33292200  |
| N | 0.20157600  | -1.53074200 | 0.56830000  |
| C | -0.14612700 | -0.62462000 | -1.88859600 |
| H | -0.78912600 | -1.45106500 | -2.20768400 |
| H | 0.24773400  | 1.57237200  | -1.65188700 |
| H | -0.12807000 | 0.09064100  | -2.72121100 |
| C | 1.16392900  | 1.86123500  | -0.05223700 |
| C | 2.37971000  | 2.48997000  | 0.59069100  |
| O | 0.41209200  | 1.08861100  | 0.55847700  |
| O | 0.98328400  | 2.13894000  | -1.33270700 |
| C | -2.28678900 | 2.78460600  | -0.62355600 |
| H | -1.54359400 | 3.24677900  | 0.03252900  |
| H | -1.96709200 | 2.93017100  | -1.65882000 |
| H | -3.22440000 | 3.33938900  | -0.49206800 |
| C | -3.00150900 | 0.41104000  | -2.67149100 |
| H | -4.07038900 | 0.53576100  | -2.88495200 |
| H | -2.48236000 | 1.27959000  | -3.08468700 |
| H | -2.66302100 | -0.47718500 | -3.21004200 |
| C | -3.24289900 | -2.28308400 | -0.94853300 |
| H | -4.32516500 | -2.46067600 | -0.91035700 |
| H | -2.92915100 | -2.40319200 | -1.98869800 |

|    |             |             |             |
|----|-------------|-------------|-------------|
| H  | -2.75767900 | -3.06763800 | -0.36055800 |
| C  | -3.11204800 | -1.50491800 | 2.10753900  |
| H  | -4.19427500 | -1.60804000 | 2.25841300  |
| H  | -2.72498100 | -2.50598200 | 1.89869600  |
| H  | -2.68795900 | -1.15241000 | 3.05163800  |
| C  | -2.33609300 | 1.62916300  | 2.29932700  |
| H  | -3.15156100 | 2.34724700  | 2.44825300  |
| H  | -2.27602400 | 1.00371900  | 3.19308900  |
| H  | -1.40333200 | 2.19796200  | 2.22568000  |
| Co | -1.00524300 | -0.13096600 | -0.15583300 |
| C  | 2.23061000  | 2.45933000  | 2.11869500  |
| H  | 3.13005200  | 2.87993900  | 2.57773400  |
| H  | 1.37255600  | 3.05541700  | 2.44713100  |
| H  | 2.09788900  | 1.43862100  | 2.48642600  |
| C  | 2.57844900  | 3.93061900  | 0.08573800  |
| H  | 3.47491300  | 4.35172400  | 0.55069600  |
| H  | 2.70513100  | 3.96470600  | -0.99888300 |
| H  | 1.72896900  | 4.56754500  | 0.35524100  |
| C  | 3.57525800  | 1.60098200  | 0.15573400  |
| H  | 4.49001700  | 1.99627500  | 0.60826800  |
| H  | 3.44390300  | 0.56706200  | 0.49047000  |
| H  | 3.69758400  | 1.60115100  | -0.93087600 |

<sup>35</sup>S\_CMD, -2561.03621755

|   |             |             |             |
|---|-------------|-------------|-------------|
| C | -3.06090700 | -0.19150500 | -0.97214200 |
| C | -2.61278800 | 1.17831400  | -0.71121400 |
| C | -2.43654400 | 1.31950000  | 0.68348900  |
| C | -2.69159700 | 0.04097300  | 1.28930100  |
| C | -3.14204100 | -0.87098400 | 0.28024800  |
| C | 3.64551500  | -1.44256900 | -1.89258400 |
| C | 3.74262300  | -2.12342700 | -0.69819000 |
| C | 2.59210100  | -2.28617700 | 0.11846000  |
| C | 1.36085900  | -1.74274100 | -0.33669700 |
| C | 1.24922800  | -1.09886800 | -1.60176500 |
| C | 2.40358800  | -0.93050800 | -2.34536700 |
| H | 3.51408000  | -3.35815600 | 1.76208900  |
| H | 4.52804100  | -1.30542800 | -2.50934600 |
| H | 4.69325200  | -2.52533700 | -0.36140800 |
| C | 2.59390100  | -2.92025000 | 1.38571600  |
| H | 2.35545100  | -0.42142500 | -3.30351400 |
| C | 0.27178000  | -2.34865700 | 1.63413700  |
| C | 1.43584300  | -2.96604500 | 2.13367300  |
| H | -0.63989400 | -2.31915000 | 2.22085900  |
| H | 1.41074000  | -3.44330800 | 3.10674300  |

|    |             |             |             |
|----|-------------|-------------|-------------|
| N  | 0.23660900  | -1.75442900 | 0.45033400  |
| C  | -0.11889300 | -0.67491900 | -2.00434900 |
| H  | -0.73169300 | -1.53606900 | -2.30794800 |
| H  | 0.06236500  | 1.73618900  | -1.46464700 |
| H  | -0.14926700 | 0.06279400  | -2.81082100 |
| C  | 1.17046000  | 1.80167400  | 0.04936900  |
| C  | 2.41114300  | 2.44117700  | 0.63965000  |
| O  | 0.50016900  | 0.94313500  | 0.62240400  |
| O  | 0.84013700  | 2.24839800  | -1.16440600 |
| C  | -1.99535600 | 2.54376800  | 1.42169000  |
| H  | -1.26492700 | 2.29729400  | 2.19792300  |
| H  | -1.54105700 | 3.27993900  | 0.75293500  |
| H  | -2.84812900 | 3.02973600  | 1.91260600  |
| C  | -2.53837300 | 2.26280100  | -1.74319100 |
| H  | -3.52598200 | 2.71787000  | -1.89250900 |
| H  | -1.85873400 | 3.06718400  | -1.44654300 |
| H  | -2.21653100 | 1.87869100  | -2.71605200 |
| C  | -3.52547500 | -0.70328600 | -2.30000400 |
| H  | -4.57651800 | -0.43285000 | -2.46422200 |
| H  | -2.94669200 | -0.27890800 | -3.12520700 |
| H  | -3.45596300 | -1.79287500 | -2.36268600 |
| C  | -3.60304800 | -2.28228400 | 0.49479500  |
| H  | -4.67466400 | -2.31192000 | 0.72808000  |
| H  | -3.44633600 | -2.89788800 | -0.39548600 |
| H  | -3.07712600 | -2.76280500 | 1.32513500  |
| C  | -2.58001200 | -0.23497800 | 2.75616800  |
| H  | -3.36947000 | 0.29077700  | 3.30784900  |
| H  | -2.68446100 | -1.29951800 | 2.98075000  |
| H  | -1.62155200 | 0.11251200  | 3.15789500  |
| Co | -1.06137100 | -0.36648300 | -0.27794000 |
| C  | 2.74704700  | 1.75595500  | 1.97113300  |
| H  | 3.64495400  | 2.21241200  | 2.39836300  |
| H  | 1.93145100  | 1.86061400  | 2.69234000  |
| H  | 2.93779500  | 0.68748200  | 1.82869800  |
| C  | 2.11398100  | 3.94220100  | 0.85956800  |
| H  | 2.99743800  | 4.42360300  | 1.29015300  |
| H  | 1.87294500  | 4.44313500  | -0.08192700 |
| H  | 1.27977400  | 4.08351800  | 1.55577400  |
| C  | 3.57647600  | 2.27190700  | -0.35997600 |
| H  | 4.47818800  | 2.72449900  | 0.06414800  |
| H  | 3.78350900  | 1.21362100  | -0.55050200 |
| H  | 3.36026200  | 2.76111600  | -1.31297800 |

55\_CMD, -2561.00605325

|   |             |             |             |
|---|-------------|-------------|-------------|
| C | -3.21147200 | -0.92287800 | -0.70263900 |
| C | -3.10136300 | 0.48227100  | -1.01637500 |
| C | -2.77037500 | 1.16189400  | 0.15535000  |
| C | -2.63998600 | 0.17449500  | 1.23633200  |
| C | -2.88181900 | -1.11204000 | 0.69621500  |
| C | 3.70539600  | -1.09211400 | -2.15670100 |
| C | 4.06771500  | -1.67297700 | -0.95994100 |
| C | 3.07132700  | -1.95891200 | 0.00869800  |
| C | 1.71321000  | -1.64413400 | -0.29216300 |
| C | 1.32775500  | -1.12217300 | -1.56931500 |
| C | 2.34924100  | -0.82357600 | -2.45987700 |
| H | 4.36705600  | -2.78633800 | 1.53546500  |
| H | 4.46607500  | -0.85813100 | -2.89499800 |
| H | 5.10488300  | -1.90814200 | -0.74222000 |
| C | 3.34519500  | -2.51734100 | 1.28261900  |
| H | 2.09781300  | -0.40298100 | -3.42937100 |
| C | 1.02316500  | -2.29306800 | 1.84740900  |
| C | 2.32488100  | -2.70636800 | 2.19208400  |
| H | 0.20550800  | -2.36104200 | 2.55925300  |
| H | 2.51027100  | -3.13381700 | 3.17085100  |
| N | 0.73078600  | -1.77979600 | 0.65922100  |
| C | -0.12599300 | -0.90830700 | -1.83160200 |
| H | -0.64227400 | -1.87158800 | -1.95997700 |
| H | -0.08681400 | 1.30398300  | -1.49147300 |
| H | -0.30861800 | -0.32863100 | -2.74110900 |
| C | 0.79228900  | 1.98190800  | 0.03484000  |
| C | 1.88174100  | 2.92449800  | 0.50246300  |
| O | 0.25447400  | 1.14969200  | 0.78317900  |
| O | 0.49711800  | 2.05817200  | -1.25348600 |
| C | -2.59079700 | 2.63450100  | 0.34815800  |
| H | -1.78487400 | 2.84449100  | 1.05659900  |
| H | -2.36272100 | 3.14484800  | -0.59039600 |
| H | -3.50298300 | 3.08781800  | 0.75595500  |
| C | -3.30749000 | 1.05509500  | -2.38501800 |
| H | -4.34858700 | 0.94246900  | -2.70871400 |
| H | -3.06698200 | 2.11970100  | -2.42104300 |
| H | -2.68584700 | 0.54248500  | -3.12815300 |
| C | -3.59182900 | -1.99532500 | -1.66314700 |
| H | -4.68567900 | -2.08093200 | -1.72595000 |
| H | -3.23157800 | -1.77718500 | -2.67253500 |
| H | -3.20979900 | -2.97271700 | -1.35764500 |
| C | -3.01063900 | -2.41051200 | 1.44569200  |
| H | -4.06315700 | -2.65631400 | 1.62764400  |

|    |             |             |             |
|----|-------------|-------------|-------------|
| H  | -2.57093800 | -3.24288900 | 0.88836800  |
| H  | -2.51321800 | -2.36362300 | 2.41742700  |
| C  | -2.36530300 | 0.52978100  | 2.66421000  |
| H  | -3.21565500 | 1.07644300  | 3.08996000  |
| H  | -2.19832800 | -0.35555700 | 3.28102300  |
| H  | -1.48731400 | 1.17828800  | 2.74627000  |
| Co | -0.80915500 | -0.52210100 | 0.07310400  |
| C  | 1.84272200  | 3.04466200  | 2.03363600  |
| H  | 2.65654400  | 3.69398000  | 2.36700500  |
| H  | 0.89925900  | 3.48343900  | 2.37306700  |
| H  | 1.95771800  | 2.07003600  | 2.51353400  |
| C  | 1.72738200  | 4.30647700  | -0.16218000 |
| H  | 2.53982900  | 4.95729100  | 0.17232300  |
| H  | 1.76765600  | 4.23648200  | -1.25101300 |
| H  | 0.78050800  | 4.77786800  | 0.11957600  |
| C  | 3.20934300  | 2.25654100  | 0.04888700  |
| H  | 4.04762000  | 2.88083500  | 0.37096800  |
| H  | 3.32795600  | 1.26431300  | 0.49602200  |
| H  | 3.24983700  | 2.15311100  | -1.03841400 |

<sup>16</sup>, -2802.35676175

|   |             |             |             |
|---|-------------|-------------|-------------|
| C | 4.39536600  | 1.40527200  | -2.10818500 |
| C | 3.93410100  | 2.56203000  | -1.51705800 |
| C | 2.68095800  | 2.56310900  | -0.84793800 |
| C | 1.93948800  | 1.34965700  | -0.81636500 |
| C | 2.37884600  | 0.18367300  | -1.49341000 |
| C | 3.61846600  | 0.21774200  | -2.10610900 |
| H | 2.65753600  | 4.62948300  | -0.18505200 |
| H | 5.36094200  | 1.40251900  | -2.60416000 |
| H | 4.52275300  | 3.47385700  | -1.54125200 |
| C | 2.12884200  | 3.68053800  | -0.17534200 |
| H | 3.98816800  | -0.66468900 | -2.62022100 |
| C | 0.29462000  | 2.28672200  | 0.52986200  |
| C | 0.92884200  | 3.54583400  | 0.49039300  |
| H | -0.62212200 | 2.15106000  | 1.08651000  |
| H | 0.47272800  | 4.38127700  | 1.00958300  |
| N | 0.78151500  | 1.21580000  | -0.08606900 |
| C | 1.39710900  | -0.93399100 | -1.49024400 |
| C | 1.70112000  | -0.81334400 | 1.86084600  |
| C | 1.82783400  | -2.02066500 | 1.11383300  |
| C | 0.53418900  | -2.63343500 | 1.06516300  |
| C | 0.36110500  | -0.75766800 | 2.41892400  |
| C | -0.34313900 | -1.88158900 | 1.94157700  |
| H | 1.84462800  | -1.91315400 | -1.66249900 |

|    |             |             |             |
|----|-------------|-------------|-------------|
| H  | 0.64990500  | -0.76232500 | -2.27131500 |
| C  | 0.19311700  | -3.93668900 | 0.40627600  |
| H  | 0.42506500  | -4.77925100 | 1.06838500  |
| H  | -0.86792300 | -3.99000900 | 0.15577800  |
| H  | 0.75469000  | -4.07279100 | -0.52050000 |
| C  | 3.10213000  | -2.55974800 | 0.54403300  |
| H  | 3.70976200  | -2.98287900 | 1.35207400  |
| H  | 2.91890700  | -3.35388300 | -0.18151800 |
| H  | 3.69348600  | -1.77844200 | 0.05956500  |
| C  | 2.80403400  | 0.15526400  | 2.16233600  |
| H  | 3.29951000  | -0.11037700 | 3.10342700  |
| H  | 3.55972300  | 0.15530300  | 1.37417200  |
| H  | 2.42412500  | 1.17483900  | 2.26455800  |
| C  | -0.09501700 | 0.26974600  | 3.41106500  |
| H  | 0.39140600  | 0.09963400  | 4.37844400  |
| H  | 0.16913400  | 1.28351900  | 3.09750700  |
| H  | -1.17324000 | 0.23403900  | 3.58063300  |
| C  | -1.75290600 | -2.28647200 | 2.24978400  |
| H  | -1.75676600 | -3.24242900 | 2.78448200  |
| H  | -2.26834800 | -1.55708600 | 2.87718900  |
| H  | -2.33854600 | -2.42942500 | 1.33634500  |
| Co | 0.39353200  | -0.72925200 | 0.22163800  |
| C  | -2.40122400 | -0.24590600 | -1.02981800 |
| C  | -2.43000300 | -1.93849300 | -2.44974200 |
| O  | -2.74999500 | -2.68058000 | -3.31487800 |
| O  | -3.10548100 | -0.78946500 | -2.04808700 |
| O  | -1.33746200 | -2.03592000 | -1.63421900 |
| N  | -1.31715400 | -0.91063300 | -0.75988400 |
| C  | -2.93788500 | 0.92824700  | -0.35993700 |
| C  | -3.66793000 | 1.87439400  | -1.09711700 |
| C  | -2.78015000 | 1.07188900  | 1.02701900  |
| C  | -4.20749500 | 2.97948700  | -0.44325800 |
| H  | -3.80585800 | 1.74179600  | -2.16497600 |
| C  | -3.33544700 | 2.17258100  | 1.67280700  |
| H  | -2.23191400 | 0.31913500  | 1.57734200  |
| C  | -4.04265100 | 3.12939100  | 0.93717300  |
| H  | -4.76466200 | 3.71907900  | -1.00857800 |
| H  | -3.22640000 | 2.28070200  | 2.74733300  |
| H  | -4.47700900 | 3.98640200  | 1.44227800  |

<sup>36</sup>, -2802.3420191

|   |            |            |             |
|---|------------|------------|-------------|
| C | 4.60885100 | 0.82323700 | -2.32568200 |
| C | 4.29418600 | 2.07850200 | -1.85112600 |
| C | 3.06378000 | 2.29087800 | -1.17417400 |

|    |             |             |             |
|----|-------------|-------------|-------------|
| C  | 2.18236300  | 1.18418700  | -1.01559300 |
| C  | 2.47635900  | -0.09039600 | -1.57348500 |
| C  | 3.70474400  | -0.26007500 | -2.18992400 |
| H  | 3.30577100  | 4.39800100  | -0.72065900 |
| H  | 5.55745500  | 0.65831500  | -2.82672300 |
| H  | 4.98380900  | 2.90850300  | -1.96968100 |
| C  | 2.66552200  | 3.52750600  | -0.60933000 |
| H  | 3.96556800  | -1.22920100 | -2.60468300 |
| C  | 0.69148400  | 2.45116500  | 0.24665900  |
| C  | 1.47497700  | 3.61122600  | 0.08201500  |
| H  | -0.23052000 | 2.48435400  | 0.81551700  |
| H  | 1.14078200  | 4.54430300  | 0.52142100  |
| N  | 1.03151100  | 1.27528500  | -0.26999700 |
| C  | 1.41267200  | -1.11852800 | -1.45630300 |
| C  | 1.71193000  | -0.66960600 | 2.17587700  |
| C  | 1.89406200  | -1.83201100 | 1.39122000  |
| C  | 0.59440700  | -2.50464600 | 1.26728900  |
| C  | 0.32430700  | -0.59019200 | 2.52228100  |
| C  | -0.35543600 | -1.74735700 | 2.00499100  |
| H  | 1.77375700  | -2.14350300 | -1.52846800 |
| H  | 0.60761200  | -0.96123700 | -2.18007700 |
| C  | 0.36315300  | -3.84144000 | 0.62886500  |
| H  | 0.53900200  | -4.64937000 | 1.34919300  |
| H  | -0.66145800 | -3.93795300 | 0.26325000  |
| H  | 1.03127400  | -4.00586300 | -0.21937900 |
| C  | 3.20679000  | -2.36455600 | 0.90650100  |
| H  | 3.76771500  | -2.79548400 | 1.74380900  |
| H  | 3.07740100  | -3.15085300 | 0.16102900  |
| H  | 3.82438400  | -1.57762500 | 0.46430400  |
| C  | 2.75688800  | 0.34255900  | 2.53962500  |
| H  | 3.07030300  | 0.23316700  | 3.58457100  |
| H  | 3.64752900  | 0.23867300  | 1.91564800  |
| H  | 2.38315800  | 1.36491000  | 2.41880800  |
| C  | -0.25594300 | 0.47885800  | 3.40114200  |
| H  | 0.14727100  | 0.39073900  | 4.41662600  |
| H  | 0.00794700  | 1.48211800  | 3.04697900  |
| H  | -1.34311100 | 0.41067600  | 3.47702500  |
| C  | -1.79465400 | -2.11571700 | 2.22637900  |
| H  | -1.90570000 | -2.73960100 | 3.12050500  |
| H  | -2.43003300 | -1.23641100 | 2.36261300  |
| H  | -2.19263500 | -2.68323700 | 1.38138200  |
| Co | 0.41612700  | -0.63304400 | 0.24170200  |
| C  | -2.72823200 | -0.25767600 | -1.01172000 |
| C  | -2.78884400 | -2.02213800 | -2.33361500 |

|   |             |             |             |
|---|-------------|-------------|-------------|
| O | -3.14035100 | -2.83148400 | -3.12284500 |
| O | -3.49795300 | -0.89740400 | -1.92194000 |
| O | -1.60996200 | -2.00080000 | -1.63393800 |
| N | -1.58857700 | -0.84597800 | -0.81325700 |
| C | -3.22222100 | 0.94441900  | -0.36212600 |
| C | -4.29226400 | 1.65803300  | -0.92341800 |
| C | -2.63530800 | 1.37234400  | 0.84020100  |
| C | -4.75541400 | 2.80787600  | -0.28649700 |
| H | -4.74985600 | 1.31413300  | -1.84469800 |
| C | -3.10757900 | 2.51779900  | 1.47032900  |
| H | -1.83296000 | 0.79143800  | 1.27877300  |
| C | -4.16583000 | 3.23888800  | 0.90472100  |
| H | -5.58025300 | 3.36493100  | -0.71813700 |
| H | -2.66533400 | 2.84100700  | 2.40762400  |
| H | -4.53722900 | 4.13077000  | 1.39944600  |

<sup>56</sup>, -2802.32564964

|   |             |             |             |
|---|-------------|-------------|-------------|
| C | 5.04129700  | 0.43749000  | -1.97817600 |
| C | 4.68511000  | 1.71133100  | -1.56240500 |
| C | 3.35712100  | 1.97457600  | -1.12095600 |
| C | 2.39016300  | 0.92482400  | -1.11554000 |
| C | 2.72793200  | -0.36924000 | -1.69326800 |
| C | 4.08872300  | -0.58160300 | -2.04634400 |
| H | 3.67452900  | 4.06533600  | -0.66136600 |
| H | 6.06230400  | 0.23461800  | -2.28466000 |
| H | 5.41206400  | 2.51712000  | -1.54937100 |
| C | 2.96027100  | 3.24713000  | -0.64856300 |
| H | 4.37179800  | -1.55658300 | -2.43112100 |
| C | 0.82251800  | 2.32739500  | -0.10663600 |
| C | 1.67940300  | 3.43418000  | -0.16925600 |
| H | -0.16432500 | 2.41887800  | 0.33445000  |
| H | 1.34124300  | 4.39902000  | 0.19112500  |
| N | 1.16367400  | 1.10956700  | -0.54436000 |
| C | 1.76609300  | -1.34367900 | -1.94855600 |
| C | 1.64163100  | -0.53747500 | 2.13266200  |
| C | 1.54584300  | -1.84433600 | 1.56231100  |
| C | 0.18625900  | -2.28334000 | 1.68382600  |
| C | 0.33964500  | -0.15577100 | 2.59617400  |
| C | -0.55880000 | -1.24533000 | 2.33673400  |
| H | 2.05233100  | -2.31671500 | -2.32949500 |
| H | 0.70402100  | -1.14097000 | -1.89745200 |
| C | -0.35240800 | -3.62953700 | 1.29220000  |
| H | -0.27280900 | -4.34233500 | 2.12202700  |
| H | -1.40770600 | -3.57429500 | 1.01110100  |



|    |             |             |             |
|----|-------------|-------------|-------------|
| H  | 0.19233700  | -4.05267200 | 0.44420500  |
| C  | 2.68550100  | -2.66347700 | 1.02932900  |
| H  | 3.13031200  | -3.27087100 | 1.82666100  |
| H  | 2.35592400  | -3.34700100 | 0.24259600  |
| H  | 3.47650400  | -2.03601700 | 0.61190500  |
| C  | 2.88001000  | 0.30362300  | 2.23144700  |
| H  | 3.34894300  | 0.20408500  | 3.21779800  |
| H  | 3.62528700  | 0.01457100  | 1.48598500  |
| H  | 2.65862600  | 1.36590300  | 2.08544500  |
| C  | 0.02630000  | 1.12176800  | 3.32449300  |
| H  | 0.37400400  | 1.07771900  | 4.36333200  |
| H  | 0.51709100  | 1.98436100  | 2.86082500  |
| H  | -1.04822700 | 1.32332900  | 3.35686700  |
| C  | -2.00000400 | -1.35523400 | 2.74879000  |
| H  | -2.11143900 | -2.04793100 | 3.59078700  |
| H  | -2.41421000 | -0.39488300 | 3.06482700  |
| H  | -2.62707100 | -1.73750600 | 1.93586900  |
| Co | 0.15819300  | -0.48196000 | 0.37528200  |
| C  | -2.71288900 | -0.33281500 | -1.05917900 |
| C  | -2.69238100 | -2.19413700 | -2.25016400 |
| O  | -2.99950800 | -3.05784600 | -2.99738000 |
| O  | -3.42984300 | -1.05020200 | -1.94993500 |
| O  | -1.54745100 | -2.11080100 | -1.49985100 |
| N  | -1.57890200 | -0.89982000 | -0.76490500 |
| C  | -3.23289800 | 0.92512900  | -0.55364800 |
| C  | -4.27580400 | 1.56709800  | -1.24177500 |
| C  | -2.69716400 | 1.49486100  | 0.61555300  |
| C  | -4.76144000 | 2.78392000  | -0.76812800 |
| H  | -4.69382000 | 1.11702800  | -2.13561800 |
| C  | -3.19058400 | 2.70843600  | 1.07953300  |
| H  | -1.92692100 | 0.97221600  | 1.17253500  |
| C  | -4.21994800 | 3.35605500  | 0.38584500  |
| H  | -5.56470400 | 3.28394900  | -1.29880700 |
| H  | -2.78700400 | 3.14217900  | 1.98901100  |
| H  | -4.60628200 | 4.30189600  | 0.75227900  |

<sup>13</sup>, -2907.7827475

|   |             |             |             |
|---|-------------|-------------|-------------|
| C | 0.14040600  | -0.50177700 | 1.92101000  |
| C | -0.38814200 | -1.75693100 | 1.50935000  |
| C | -1.79899700 | -1.76675500 | 1.82281000  |
| C | -2.11133200 | -0.54751800 | 2.52158700  |
| C | -0.94008500 | 0.25671400  | 2.53037400  |
| C | 2.94925700  | 2.93555400  | -1.06544700 |
| C | 2.03610900  | 3.82462100  | -0.55214200 |

|   |             |             |             |
|---|-------------|-------------|-------------|
| C | 0.70244700  | 3.40330900  | -0.31700000 |
| C | 0.32487400  | 2.03393100  | -0.56732300 |
| C | 1.25886400  | 1.15962300  | -1.20291900 |
| C | 2.54820500  | 1.62867700  | -1.41831800 |
| H | -0.00392700 | 5.35013800  | 0.29739100  |
| H | 3.97781100  | 3.23768000  | -1.23771800 |
| H | 2.30474400  | 4.85511000  | -0.33642500 |
| C | -0.28213400 | 4.31282700  | 0.12948100  |
| H | 3.26124400  | 0.93778700  | -1.86467000 |
| C | -1.84740500 | 2.51490300  | 0.18368700  |
| C | -1.57459000 | 3.88450000  | 0.32626700  |
| H | -2.83077200 | 2.12919900  | 0.42444600  |
| H | -2.36573700 | 4.55826400  | 0.63555400  |
| N | -0.94410100 | 1.60951800  | -0.19767100 |
| C | 0.89463600  | -0.20706700 | -1.70807200 |
| H | 0.64531700  | -0.88609300 | -0.89672400 |
| H | 0.02319800  | -0.15503800 | -2.36651000 |
| H | 1.75470500  | -0.65414200 | -2.21104600 |
| C | 4.04174800  | -1.38304900 | -0.78301100 |
| C | 5.45473300  | -1.17961800 | -0.13421400 |
| O | 3.93904100  | -1.04805000 | -1.99216500 |
| O | 3.12475900  | -1.83525200 | -0.03550700 |
| C | -3.03348900 | -0.68093000 | -1.13737600 |
| C | -3.98893100 | -0.90653200 | -2.29308700 |
| O | -1.85614000 | -1.15838500 | -1.14647100 |
| O | -3.33544300 | 0.03455200  | -0.11643800 |
| C | 1.56585300  | -0.05751600 | 1.87492500  |
| H | 1.64479500  | 1.01110600  | 1.66294500  |
| H | 2.00885300  | -0.22757000 | 2.86553000  |
| H | 2.16189900  | -0.61838600 | 1.14342400  |
| C | -0.77798400 | 1.62003300  | 3.12736400  |
| H | -0.32812100 | 1.54258400  | 4.12403500  |
| H | -0.11797300 | 2.23833300  | 2.51513200  |
| H | -1.73277300 | 2.14042900  | 3.22488900  |
| C | -3.47568800 | -0.16863800 | 3.00510900  |
| H | -3.78928000 | -0.84221300 | 3.81001200  |
| H | -3.50098900 | 0.85308800  | 3.38793600  |
| H | -4.20248700 | -0.24970400 | 2.19149200  |
| C | -2.75129400 | -2.88340100 | 1.52658000  |
| H | -2.67850200 | -3.67206900 | 2.28446200  |
| H | -3.78319300 | -2.52503200 | 1.50709300  |
| H | -2.52572100 | -3.32986100 | 0.55541100  |
| C | 0.32906100  | -2.85927400 | 0.80017700  |
| H | 0.45890100  | -3.69991700 | 1.49416900  |

|    |             |             |             |
|----|-------------|-------------|-------------|
| H  | -0.27453500 | -3.21804900 | -0.03964100 |
| H  | 1.31446300  | -2.55712200 | 0.42579600  |
| Co | -1.48323700 | -0.20366500 | 0.55784200  |
| C  | 5.46633000  | -1.62765300 | 1.33234100  |
| H  | 6.46671300  | -1.50980100 | 1.77001200  |
| H  | 4.75819600  | -1.04072000 | 1.92600000  |
| H  | 5.16540200  | -2.67529100 | 1.41797900  |
| C  | 6.47912700  | -1.98919200 | -0.94940800 |
| H  | 6.27914800  | -3.06423500 | -0.86881800 |
| H  | 6.41230300  | -1.71218100 | -2.00449700 |
| H  | 7.50235000  | -1.80927900 | -0.59373100 |
| C  | 5.80041600  | 0.31917000  | -0.23012400 |
| H  | 5.07406800  | 0.92523300  | 0.32690900  |
| H  | 6.79651100  | 0.52497900  | 0.18288800  |
| H  | 5.77949400  | 0.63944700  | -1.27565200 |
| C  | -3.96520100 | -2.40304800 | -2.66392700 |
| H  | -4.33588700 | -3.01959200 | -1.83782000 |
| H  | -4.60837600 | -2.57826800 | -3.53194600 |
| H  | -2.95129900 | -2.72852100 | -2.90744800 |
| C  | -5.40740600 | -0.45791200 | -1.91216100 |
| H  | -6.08161400 | -0.60870300 | -2.76099400 |
| H  | -5.79083400 | -1.03396200 | -1.06435300 |
| H  | -5.42750800 | 0.59959000  | -1.63670500 |
| C  | -3.45123200 | -0.06264700 | -3.47383700 |
| H  | -3.43909000 | 1.00313400  | -3.22271700 |
| H  | -2.43525900 | -0.36696800 | -3.73860300 |
| H  | -4.09680600 | -0.20040200 | -4.34706000 |

<sup>33</sup>, -2907.78449688

|   |             |             |             |
|---|-------------|-------------|-------------|
| C | 0.15666800  | -0.58467000 | 2.04444500  |
| C | -0.44630900 | -1.77143300 | 1.59191300  |
| C | -1.87353000 | -1.63716700 | 1.83091300  |
| C | -2.13182300 | -0.37830400 | 2.50472300  |
| C | -0.90654300 | 0.28157000  | 2.61504400  |
| C | 3.18558000  | 2.85349200  | -1.30732900 |
| C | 2.37293000  | 3.81331400  | -0.75122800 |
| C | 1.03913600  | 3.48487200  | -0.39721200 |
| C | 0.57004000  | 2.14165000  | -0.59074300 |
| C | 1.40324800  | 1.17778200  | -1.23072700 |
| C | 2.69378700  | 1.55285900  | -1.56721600 |
| H | 0.47603300  | 5.46476300  | 0.26417400  |
| H | 4.21071800  | 3.09133900  | -1.57453100 |
| H | 2.72586900  | 4.82753100  | -0.58633700 |
| C | 0.13682100  | 4.44177600  | 0.12276700  |

|    |             |             |             |
|----|-------------|-------------|-------------|
| H  | 3.33406800  | 0.80650100  | -2.03037100 |
| C  | -1.52761700 | 2.72996400  | 0.27828000  |
| C  | -1.15663700 | 4.07778900  | 0.42634100  |
| H  | -2.51904900 | 2.38705200  | 0.55177100  |
| H  | -1.88008000 | 4.79325300  | 0.80086400  |
| N  | -0.69855200 | 1.79262300  | -0.17604200 |
| C  | 0.88808400  | -0.18925900 | -1.58741000 |
| H  | 0.71216700  | -0.80312000 | -0.69532800 |
| H  | -0.03208700 | -0.13465500 | -2.17712400 |
| H  | 1.65674500  | -0.75557300 | -2.12041200 |
| C  | 3.92711700  | -1.55002400 | -0.81220500 |
| C  | 5.34753200  | -1.38904000 | -0.18159900 |
| O  | 3.81989600  | -1.30423500 | -2.04029400 |
| O  | 2.98251400  | -1.91173200 | -0.04585600 |
| C  | -3.23844500 | -0.55632800 | -1.13362900 |
| C  | -4.35160000 | -0.90789800 | -2.11831900 |
| O  | -2.14046300 | -1.21566100 | -1.17514100 |
| O  | -3.35643700 | 0.37572500  | -0.28382800 |
| C  | 1.61083200  | -0.25704900 | 2.10767100  |
| H  | 1.78262900  | 0.81167800  | 1.94580600  |
| H  | 1.99777800  | -0.50023200 | 3.10707000  |
| H  | 2.19774900  | -0.82877200 | 1.37569200  |
| C  | -0.62695900 | 1.60870700  | 3.24039800  |
| H  | -0.10638600 | 1.47346200  | 4.19663300  |
| H  | 0.02562200  | 2.21517200  | 2.60571700  |
| H  | -1.54172800 | 2.17390300  | 3.42888500  |
| C  | -3.49202000 | 0.10210000  | 2.91234500  |
| H  | -3.95014000 | -0.58019100 | 3.63716500  |
| H  | -3.44519800 | 1.09170100  | 3.37239600  |
| H  | -4.14965400 | 0.16605000  | 2.03975100  |
| C  | -2.89929200 | -2.67448700 | 1.52274500  |
| H  | -2.89226000 | -3.45464000 | 2.29531100  |
| H  | -3.90182000 | -2.24233200 | 1.48655300  |
| H  | -2.68958400 | -3.15085800 | 0.56278900  |
| C  | 0.21415600  | -2.98301800 | 1.00408500  |
| H  | 0.34884800  | -3.75194000 | 1.77557100  |
| H  | -0.40919200 | -3.41305600 | 0.21435600  |
| H  | 1.19371600  | -2.74631300 | 0.57766600  |
| Co | -1.27856500 | -0.12488900 | 0.30053000  |
| C  | 5.32136100  | -1.63528700 | 1.33225000  |
| H  | 6.33308100  | -1.57283500 | 1.75321700  |
| H  | 4.69516400  | -0.89441400 | 1.84059100  |
| H  | 4.90591600  | -2.62104400 | 1.55672100  |
| C  | 6.27657100  | -2.40615700 | -0.87170900 |

|   |             |             |             |
|---|-------------|-------------|-------------|
| H | 5.96072900  | -3.43299100 | -0.65411700 |
| H | 6.24407800  | -2.26417400 | -1.95499700 |
| H | 7.31193900  | -2.29047800 | -0.52638600 |
| C | 5.84429200  | 0.03841100  | -0.47829100 |
| H | 5.19664900  | 0.78584400  | -0.00309500 |
| H | 6.86335000  | 0.18666300  | -0.09944600 |
| H | 5.83906100  | 0.21932700  | -1.55652100 |
| C | -4.63110200 | -2.42170400 | -2.01993600 |
| H | -4.99238100 | -2.69215500 | -1.02146900 |
| H | -5.40081900 | -2.70657400 | -2.74468100 |
| H | -3.72568400 | -2.99756100 | -2.22512200 |
| C | -5.62052300 | -0.10324300 | -1.80451700 |
| H | -6.40727700 | -0.35277300 | -2.52408200 |
| H | -5.99017400 | -0.32597700 | -0.79908200 |
| H | -5.42817500 | 0.97137500  | -1.85699100 |
| C | -3.83009700 | -0.56591800 | -3.53235600 |
| H | -3.61533700 | 0.50428300  | -3.62366900 |
| H | -2.91497900 | -1.12134800 | -3.75261600 |
| H | -4.58681900 | -0.82483200 | -4.28038300 |

<sup>53</sup>, -2907.76554381

|   |             |             |             |
|---|-------------|-------------|-------------|
| C | 0.31090400  | -0.16595500 | 2.15168000  |
| C | -0.43734300 | -1.37031400 | 1.83019800  |
| C | -1.79755000 | -1.09025000 | 2.09670400  |
| C | -1.91137300 | 0.31284300  | 2.52202500  |
| C | -0.62793900 | 0.86146700  | 2.53810800  |
| C | 3.16710900  | 2.75285300  | -1.61588100 |
| C | 2.32528000  | 3.76749000  | -1.22303000 |
| C | 0.98662100  | 3.46824400  | -0.85864900 |
| C | 0.54814000  | 2.10339900  | -0.88263900 |
| C | 1.41096900  | 1.07388100  | -1.35257900 |
| C | 2.70719700  | 1.41585000  | -1.70026800 |
| H | 0.36101700  | 5.50156400  | -0.47368900 |
| H | 4.19591700  | 2.97148100  | -1.88540000 |
| H | 2.66144700  | 4.80008400  | -1.19050500 |
| C | 0.05082200  | 4.45985300  | -0.48468500 |
| H | 3.36945700  | 0.61863400  | -2.03198600 |
| C | -1.57817400 | 2.74179500  | -0.12521500 |
| C | -1.23878200 | 4.10494100  | -0.14593200 |
| H | -2.56276800 | 2.40677000  | 0.18371300  |
| H | -1.98078400 | 4.84608700  | 0.12868900  |
| N | -0.71988600 | 1.78007900  | -0.45702500 |
| C | 0.91151800  | -0.33476400 | -1.51815400 |
| H | 0.68303200  | -0.81565500 | -0.54938100 |

|    |             |             |             |
|----|-------------|-------------|-------------|
| H  | 0.04283600  | -0.38574200 | -2.18481000 |
| H  | 1.71581500  | -0.98114800 | -1.89479300 |
| C  | 3.85228300  | -1.70455800 | -0.65494500 |
| C  | 5.30048500  | -1.60016500 | -0.07256600 |
| O  | 3.73182800  | -1.46656800 | -1.88808000 |
| O  | 2.91557200  | -1.99019500 | 0.14720000  |
| C  | -3.30132700 | -0.88423800 | -1.02290600 |
| C  | -4.49771200 | -1.43509100 | -1.79043400 |
| O  | -2.16837700 | -1.48399800 | -1.11464400 |
| O  | -3.38333200 | 0.15196200  | -0.29258200 |
| C  | 1.78787000  | -0.02273100 | 2.14306200  |
| H  | 2.08879800  | 1.02229100  | 2.02564400  |
| H  | 2.19337700  | -0.37293700 | 3.10481200  |
| H  | 2.26705400  | -0.64647900 | 1.37154600  |
| C  | -0.22779400 | 2.26376100  | 2.87828900  |
| H  | 0.40516900  | 2.28463000  | 3.77303500  |
| H  | 0.35209300  | 2.71666200  | 2.06655400  |
| H  | -1.09400900 | 2.90185900  | 3.06506200  |
| C  | -3.21411200 | 0.97354200  | 2.83799900  |
| H  | -3.70119700 | 0.49106600  | 3.69437000  |
| H  | -3.08679300 | 2.03114700  | 3.07954000  |
| H  | -3.89736100 | 0.89027400  | 1.98545600  |
| C  | -2.93666500 | -2.05846500 | 2.06942800  |
| H  | -3.11675600 | -2.46356300 | 3.07384400  |
| H  | -3.85669100 | -1.57091500 | 1.73730300  |
| H  | -2.72717900 | -2.89633400 | 1.40207600  |
| C  | 0.15398400  | -2.71173800 | 1.49909300  |
| H  | 0.34613100  | -3.27606800 | 2.42096800  |
| H  | -0.53854900 | -3.29840400 | 0.88884100  |
| H  | 1.09955500  | -2.61560600 | 0.95650100  |
| Co | -1.25910700 | -0.12987800 | 0.07642700  |
| C  | 5.32095600  | -1.91533100 | 1.42832100  |
| H  | 6.34656300  | -1.88448400 | 1.81866600  |
| H  | 4.71850800  | -1.19397700 | 1.98964800  |
| H  | 4.89999200  | -2.90568200 | 1.62076500  |
| C  | 6.19761700  | -2.58965100 | -0.83870200 |
| H  | 5.88424200  | -3.62369300 | -0.65357200 |
| H  | 6.12385100  | -2.40186900 | -1.91278200 |
| H  | 7.24622300  | -2.49435300 | -0.52826900 |
| C  | 5.80256000  | -0.16380200 | -0.31734100 |
| H  | 5.16423100  | 0.56802400  | 0.19440000  |
| H  | 6.82669200  | -0.03434800 | 0.05512700  |
| H  | 5.78765300  | 0.06089600  | -1.38749100 |
| C  | -4.69335300 | -2.90906100 | -1.37393100 |

|   |             |             |             |
|---|-------------|-------------|-------------|
| H | -4.93071500 | -2.98990500 | -0.30765100 |
| H | -5.52365100 | -3.34552700 | -1.93843700 |
| H | -3.79002200 | -3.49106400 | -1.57061600 |
| C | -5.75884200 | -0.61566300 | -1.48387100 |
| H | -6.60906600 | -1.02004100 | -2.04261300 |
| H | -6.00060700 | -0.64715200 | -0.41750100 |
| H | -5.62628800 | 0.43272900  | -1.76390200 |
| C | -4.15391000 | -1.36168900 | -3.29516600 |
| H | -4.00256700 | -0.32483400 | -3.61443400 |
| H | -3.24436900 | -1.92663100 | -3.51307900 |
| H | -4.97734500 | -1.77996500 | -3.88322000 |

<sup>1</sup>TS4, -2907.7541085, i661.14

|   |             |             |             |
|---|-------------|-------------|-------------|
| C | 0.22008900  | 0.18272000  | 2.39220800  |
| C | -0.21146400 | -1.19377300 | 2.22102300  |
| C | -1.63853100 | -1.20108600 | 2.22255300  |
| C | -2.09926900 | 0.15214200  | 2.29266400  |
| C | -0.93463500 | 1.00230900  | 2.41003400  |
| C | 1.96702000  | 3.73915800  | -1.37367900 |
| C | 0.74108100  | 4.36556200  | -1.43988400 |
| C | -0.44267900 | 3.62395200  | -1.18850700 |
| C | -0.31357500 | 2.24751400  | -0.84341200 |
| C | 0.94366900  | 1.58335700  | -0.86114300 |
| C | 2.07029400  | 2.35000200  | -1.11123000 |
| H | -1.88829000 | 5.20339200  | -1.52764700 |
| H | 2.87310700  | 4.30706500  | -1.56356200 |
| H | 0.66243700  | 5.42069600  | -1.68600700 |
| C | -1.75290700 | 4.16057500  | -1.25269900 |
| H | 3.03559000  | 1.85528200  | -1.15164700 |
| C | -2.62431100 | 2.02179800  | -0.56627900 |
| C | -2.83727400 | 3.35484600  | -0.98032500 |
| H | -3.43439200 | 1.35034400  | -0.30730800 |
| H | -3.85273800 | 3.72918400  | -1.04826300 |
| N | -1.40670800 | 1.50500900  | -0.46903600 |
| C | 0.96879300  | 0.09465200  | -0.71906800 |
| H | 1.22379600  | -0.36520600 | 0.23806500  |
| H | 0.29755500  | -0.45797800 | -1.37279600 |
| H | 2.10404900  | -0.27735800 | -1.09998500 |
| C | 4.00913400  | -0.98574200 | -0.31469800 |
| C | 5.54667900  | -1.15981400 | -0.41428200 |
| O | 3.45491800  | -0.50589100 | -1.37823200 |
| O | 3.41122800  | -1.29587800 | 0.73399200  |
| C | -2.85319800 | -1.44904200 | -0.97362400 |
| C | -3.12205300 | -2.50151300 | -2.07282500 |

|    |             |             |             |
|----|-------------|-------------|-------------|
| O  | -1.59483100 | -1.35615800 | -0.65669000 |
| O  | -3.77171200 | -0.79047800 | -0.46907000 |
| C  | 1.63146600  | 0.66436000  | 2.54705600  |
| H  | 1.78174500  | 1.61418900  | 2.02573800  |
| H  | 1.84096900  | 0.83276200  | 3.61079600  |
| H  | 2.35906700  | -0.04842500 | 2.15364200  |
| C  | -0.95091900 | 2.49488500  | 2.54390700  |
| H  | -1.05992000 | 2.78471700  | 3.59557500  |
| H  | -0.02512400 | 2.93609800  | 2.16892300  |
| H  | -1.78161300 | 2.93740600  | 1.98916000  |
| C  | -3.52860300 | 0.58829100  | 2.38595600  |
| H  | -3.91198200 | 0.41295200  | 3.39867400  |
| H  | -3.63389400 | 1.65517300  | 2.17602000  |
| H  | -4.14269800 | 0.03666200  | 1.67277600  |
| C  | -2.50597800 | -2.41366100 | 2.10651100  |
| H  | -2.66630300 | -2.85430000 | 3.09794700  |
| H  | -3.47359300 | -2.16195300 | 1.67177600  |
| H  | -2.03563100 | -3.16789900 | 1.47303500  |
| C  | 0.67592500  | -2.40109700 | 2.15359500  |
| H  | 0.85001300  | -2.80007500 | 3.16103500  |
| H  | 0.20483100  | -3.18970800 | 1.56140500  |
| H  | 1.64341600  | -2.17002400 | 1.70213200  |
| Co | -0.91226800 | -0.08096200 | 0.57656600  |
| C  | 6.10515600  | -1.70607100 | 0.90568700  |
| H  | 7.19139900  | -1.83791300 | 0.83525100  |
| H  | 5.88886400  | -1.02455600 | 1.73337900  |
| H  | 5.64995500  | -2.66910100 | 1.15173400  |
| C  | 5.84666300  | -2.13638100 | -1.56897900 |
| H  | 5.42149400  | -3.12559500 | -1.36501600 |
| H  | 5.41560600  | -1.76687900 | -2.50276100 |
| H  | 6.92885200  | -2.25504200 | -1.70047400 |
| C  | 6.16807600  | 0.21546700  | -0.72988400 |
| H  | 5.95985000  | 0.93353000  | 0.07250600  |
| H  | 7.25672600  | 0.13217600  | -0.83046800 |
| H  | 5.75912900  | 0.61432600  | -1.66172200 |
| C  | -2.59873300 | -3.86815900 | -1.58566300 |
| H  | -3.12097200 | -4.18692800 | -0.67618700 |
| H  | -2.76603000 | -4.63273000 | -2.35242700 |
| H  | -1.52883900 | -3.81861400 | -1.36903100 |
| C  | -4.62718000 | -2.58116700 | -2.36051900 |
| H  | -4.82192700 | -3.32592000 | -3.14023100 |
| H  | -5.18380200 | -2.86276100 | -1.46240900 |
| H  | -5.01403300 | -1.61510900 | -2.69534500 |
| C  | -2.35625600 | -2.07594600 | -3.34274100 |



|   |             |             |             |
|---|-------------|-------------|-------------|
| H | -2.69634800 | -1.09578200 | -3.69608400 |
| H | -1.28263900 | -2.01657500 | -3.14732000 |
| H | -2.52520800 | -2.80020900 | -4.14744500 |

<sup>3</sup>TS4, -2907.74872991, i1236.00

|   |             |             |             |
|---|-------------|-------------|-------------|
| C | -0.05335200 | 0.40198900  | 2.32209900  |
| C | -0.44387400 | -0.98987300 | 2.28878400  |
| C | -1.84963300 | -1.02140400 | 2.22990000  |
| C | -2.35234900 | 0.36210500  | 2.24559200  |
| C | -1.25366300 | 1.22141600  | 2.31451500  |
| C | 2.43405900  | 3.69192800  | -1.11334500 |
| C | 1.28328900  | 4.42496900  | -1.30686600 |
| C | 0.02234900  | 3.77842100  | -1.24288200 |
| C | -0.01977800 | 2.37521500  | -0.97476100 |
| C | 1.17948400  | 1.60560400  | -0.85221200 |
| C | 2.38476800  | 2.29402800  | -0.90161600 |
| H | -1.21459500 | 5.51443600  | -1.62988100 |
| H | 3.40147600  | 4.18408300  | -1.15327200 |
| H | 1.32288000  | 5.49248700  | -1.50429100 |
| C | -1.21479800 | 4.45043100  | -1.40736900 |
| H | 3.30705600  | 1.72801600  | -0.82471000 |
| C | -2.35081200 | 2.38787800  | -0.93677600 |
| C | -2.39794600 | 3.75588700  | -1.27893300 |
| H | -3.25052700 | 1.80517100  | -0.76893700 |
| H | -3.35825200 | 4.24359300  | -1.40695100 |
| N | -1.21113700 | 1.73192600  | -0.77879300 |
| C | 1.11360300  | 0.12905700  | -0.72072100 |
| H | 1.32355600  | -0.31118300 | 0.25174700  |
| H | 0.38845500  | -0.39626300 | -1.34454600 |
| H | 2.27715900  | -0.34836400 | -1.10238100 |
| C | 4.01924500  | -1.11160200 | -0.15186200 |
| C | 5.50454100  | -1.54050200 | -0.25743500 |
| O | 3.51246000  | -0.71229100 | -1.28436400 |
| O | 3.41999000  | -1.15306100 | 0.93140800  |
| C | -2.51102700 | -1.67132500 | -1.04514900 |
| C | -3.29833600 | -2.67353100 | -1.89241400 |
| O | -1.30784300 | -1.93490700 | -0.72352600 |
| O | -3.02785100 | -0.57350000 | -0.66444600 |
| C | 1.32428900  | 0.94170200  | 2.53120200  |
| H | 1.48894300  | 1.84344200  | 1.93299600  |
| H | 1.44615500  | 1.22804900  | 3.58528600  |
| H | 2.10202900  | 0.22055900  | 2.27428700  |
| C | -1.24819600 | 2.71911300  | 2.36649800  |
| H | -0.96840600 | 3.07949800  | 3.36409500  |

|    |             |             |             |
|----|-------------|-------------|-------------|
| H  | -0.52710100 | 3.13907600  | 1.65810600  |
| H  | -2.22879700 | 3.13478800  | 2.12456900  |
| C  | -3.80492700 | 0.71496700  | 2.18477000  |
| H  | -4.33432200 | 0.35473100  | 3.07539000  |
| H  | -3.95642600 | 1.79487900  | 2.11982200  |
| H  | -4.26834800 | 0.24787600  | 1.30969100  |
| C  | -2.72735100 | -2.23163700 | 2.21300200  |
| H  | -3.10373800 | -2.45779700 | 3.21909500  |
| H  | -3.59260500 | -2.07159800 | 1.56382100  |
| H  | -2.18516300 | -3.10617900 | 1.84905900  |
| C  | 0.47913200  | -2.17384800 | 2.32656400  |
| H  | 0.60749400  | -2.53972100 | 3.35305500  |
| H  | 0.07255600  | -2.99256800 | 1.72638800  |
| H  | 1.46766800  | -1.93352600 | 1.92775900  |
| Co | -1.12977700 | -0.09751700 | 0.29258100  |
| C  | 6.01435800  | -1.99300300 | 1.11670100  |
| H  | 7.06488200  | -2.29874500 | 1.04890200  |
| H  | 5.93070100  | -1.18631800 | 1.85009400  |
| H  | 5.42768600  | -2.83569700 | 1.49216800  |
| C  | 5.60762200  | -2.69374700 | -1.27553100 |
| H  | 5.03394700  | -3.56485200 | -0.93983700 |
| H  | 5.21818200  | -2.38396400 | -2.24829100 |
| H  | 6.65243000  | -3.00362400 | -1.39502000 |
| C  | 6.31967600  | -0.33177300 | -0.76052100 |
| H  | 6.25648300  | 0.50493100  | -0.05468400 |
| H  | 7.37687800  | -0.60167500 | -0.86617500 |
| H  | 5.94548500  | 0.00762800  | -1.72963300 |
| C  | -3.20153700 | -4.06005300 | -1.22456000 |
| H  | -3.67233800 | -4.05441000 | -0.23539200 |
| H  | -3.71432600 | -4.80869400 | -1.83797000 |
| H  | -2.15739600 | -4.35769100 | -1.10408200 |
| C  | -4.76495700 | -2.23993400 | -2.02269400 |
| H  | -5.31492700 | -2.95945800 | -2.63883600 |
| H  | -5.24836700 | -2.18609700 | -1.04247300 |
| H  | -4.84359300 | -1.25272600 | -2.48522100 |
| C  | -2.62443900 | -2.71885700 | -3.28185100 |
| H  | -2.67355700 | -1.74134300 | -3.77401200 |
| H  | -1.57376000 | -3.00604800 | -3.19107200 |
| H  | -3.13430600 | -3.44687200 | -3.92214700 |

<sup>5</sup>TS4, -2907.73665915, i1319.33

|   |             |             |            |
|---|-------------|-------------|------------|
| C | 0.01806200  | 0.39761000  | 2.32671900 |
| C | -0.42440000 | -0.97042600 | 2.23060500 |
| C | -1.84367300 | -0.95672100 | 2.23357900 |

|   |             |             |             |
|---|-------------|-------------|-------------|
| C | -2.29218600 | 0.42343200  | 2.28820200  |
| C | -1.15259200 | 1.24705100  | 2.32693400  |
| C | 2.50486500  | 3.65254400  | -1.12099200 |
| C | 1.36215900  | 4.40119700  | -1.29868100 |
| C | 0.09504800  | 3.76738300  | -1.23232800 |
| C | 0.03900000  | 2.36070100  | -0.98024500 |
| C | 1.22813600  | 1.57332300  | -0.87709900 |
| C | 2.43939300  | 2.25265900  | -0.92694700 |
| H | -1.11834900 | 5.52504700  | -1.58419900 |
| H | 3.47803300  | 4.13314000  | -1.16061400 |
| H | 1.41169100  | 5.47051500  | -1.48316500 |
| C | -1.13274100 | 4.45860200  | -1.37408000 |
| H | 3.35598400  | 1.67600200  | -0.86118000 |
| C | -2.29867700 | 2.41464500  | -0.90642300 |
| C | -2.32737800 | 3.78388800  | -1.23468900 |
| H | -3.20399500 | 1.84499000  | -0.72595100 |
| H | -3.28068200 | 4.28957700  | -1.34161100 |
| N | -1.16431600 | 1.73794600  | -0.77774800 |
| C | 1.15785200  | 0.09441300  | -0.76262500 |
| H | 1.33528700  | -0.36902400 | 0.20499400  |
| H | 0.45984300  | -0.42376700 | -1.42327700 |
| H | 2.36328000  | -0.37933300 | -1.11716200 |
| C | 4.06139600  | -1.18726300 | -0.16989800 |
| C | 5.54354900  | -1.62207800 | -0.27141900 |
| O | 3.57235700  | -0.73561400 | -1.29242300 |
| O | 3.44361800  | -1.27092800 | 0.89962800  |
| C | -2.68003600 | -1.61598200 | -1.01295800 |
| C | -3.51350200 | -2.61616800 | -1.81330900 |
| O | -1.45357200 | -1.89198100 | -0.76007900 |
| O | -3.16143600 | -0.51827400 | -0.60266000 |
| C | 1.41888800  | 0.88495600  | 2.50867400  |
| H | 1.60513100  | 1.78599700  | 1.91472300  |
| H | 1.58428300  | 1.15625200  | 3.56094000  |
| H | 2.16332900  | 0.13851200  | 2.22532900  |
| C | -1.10476200 | 2.74384400  | 2.38474900  |
| H | -0.83935800 | 3.09468900  | 3.39000800  |
| H | -0.35254500 | 3.14385500  | 1.69709800  |
| H | -2.06591700 | 3.19098100  | 2.12051700  |
| C | -3.73018200 | 0.84073400  | 2.26753000  |
| H | -4.25013800 | 0.51377300  | 3.17649000  |
| H | -3.83548300 | 1.92642000  | 2.20019300  |
| H | -4.24458400 | 0.39205900  | 1.41133800  |
| C | -2.74679200 | -2.15032100 | 2.23170500  |
| H | -3.02205000 | -2.43727800 | 3.25494600  |

|    |             |             |             |
|----|-------------|-------------|-------------|
| H  | -3.67030100 | -1.94041000 | 1.68545300  |
| H  | -2.26189800 | -3.00867600 | 1.76213600  |
| C  | 0.44567600  | -2.19482100 | 2.23797400  |
| H  | 0.53459400  | -2.60505200 | 3.25221800  |
| H  | 0.01499100  | -2.97309600 | 1.60125100  |
| H  | 1.45220700  | -1.98514300 | 1.86858500  |
| Co | -1.13041900 | -0.10275300 | 0.18755100  |
| C  | 6.03197200  | -2.13136100 | 1.09060100  |
| H  | 7.08097000  | -2.44278600 | 1.02526100  |
| H  | 5.94437800  | -1.35287900 | 1.85348700  |
| H  | 5.43372500  | -2.98289800 | 1.42566600  |
| C  | 5.65265100  | -2.73601600 | -1.33204400 |
| H  | 5.06940500  | -3.61559000 | -1.03736400 |
| H  | 5.27748700  | -2.38623900 | -2.29687200 |
| H  | 6.69693400  | -3.04810100 | -1.45056300 |
| C  | 6.37485000  | -0.40170100 | -0.71684800 |
| H  | 6.30813500  | 0.40800900  | 0.01947500  |
| H  | 7.43137400  | -0.67583000 | -0.81852100 |
| H  | 6.01668900  | -0.02268600 | -1.67733000 |
| C  | -3.41223200 | -3.99470900 | -1.12831900 |
| H  | -3.84257500 | -3.96677000 | -0.12159900 |
| H  | -3.96229200 | -4.74169400 | -1.71040900 |
| H  | -2.36947800 | -4.31002100 | -1.04652600 |
| C  | -4.97666500 | -2.15895300 | -1.88998500 |
| H  | -5.56294500 | -2.87865700 | -2.47112500 |
| H  | -5.41750000 | -2.08100800 | -0.89174100 |
| H  | -5.05832700 | -1.17816900 | -2.36567000 |
| C  | -2.89647300 | -2.69351100 | -3.22783200 |
| H  | -2.94901700 | -1.72296100 | -3.73329500 |
| H  | -1.84839800 | -2.99890200 | -3.17587200 |
| H  | -3.44538200 | -3.42148700 | -3.83474000 |

<sup>15</sup>, -2907.79490776

|   |             |             |             |
|---|-------------|-------------|-------------|
| C | 0.49038700  | -0.48662400 | 2.08481000  |
| C | -0.20937200 | -1.69622600 | 1.74390700  |
| C | -1.60203700 | -1.49189600 | 2.05581300  |
| C | -1.77920600 | -0.15823400 | 2.49102000  |
| C | -0.47954800 | 0.47663200  | 2.48008700  |
| C | 2.15524900  | 3.52590600  | -1.26208100 |
| C | 1.03644300  | 4.31342900  | -1.08859000 |
| C | -0.20295300 | 3.70814000  | -0.74804900 |
| C | -0.23026700 | 2.29669300  | -0.58943700 |
| C | 0.90096200  | 1.47446400  | -0.85129400 |
| C | 2.09196000  | 2.11197500  | -1.15724400 |

|    |             |             |             |
|----|-------------|-------------|-------------|
| H  | -1.44500100 | 5.48516600  | -0.64498800 |
| H  | 3.10529100  | 3.99189200  | -1.50922700 |
| H  | 1.08909000  | 5.39300100  | -1.19714500 |
| C  | -1.41792000 | 4.40510800  | -0.52531100 |
| H  | 2.97787900  | 1.51915500  | -1.35892900 |
| C  | -2.47403800 | 2.30718500  | 0.03897400  |
| C  | -2.54855900 | 3.70486000  | -0.16301200 |
| H  | -3.32400300 | 1.70768900  | 0.34261300  |
| H  | -3.49593900 | 4.20834300  | -0.00321800 |
| N  | -1.34493600 | 1.63743600  | -0.14084500 |
| C  | 0.62728500  | 0.01140400  | -0.77377100 |
| H  | 1.50669000  | -0.58641700 | -0.53568900 |
| H  | 0.16762600  | -0.35265700 | -1.69973800 |
| H  | 2.90095900  | -1.00127400 | -2.18618400 |
| C  | 4.17844000  | -1.40419300 | -0.85994700 |
| C  | 5.55514700  | -0.98359300 | -0.34895700 |
| O  | 3.80900700  | -0.72357200 | -1.97209000 |
| O  | 3.46058100  | -2.24023300 | -0.34941600 |
| C  | -3.17588700 | -0.99099600 | -0.92227500 |
| C  | -3.79162000 | -1.76709900 | -2.11289700 |
| O  | -1.88655200 | -1.10743100 | -0.84969300 |
| O  | -3.89397000 | -0.34327900 | -0.14553400 |
| C  | 1.97415500  | -0.26503200 | 2.07123100  |
| H  | 2.23627200  | 0.66691500  | 1.55927300  |
| H  | 2.35328600  | -0.19694200 | 3.09818300  |
| H  | 2.49657600  | -1.08154600 | 1.57198900  |
| C  | -0.18916800 | 1.89448200  | 2.87556100  |
| H  | -0.06978400 | 1.98590300  | 3.96205700  |
| H  | 0.73002800  | 2.25398700  | 2.40595100  |
| H  | -0.99807200 | 2.56592900  | 2.57454800  |
| C  | -3.07417700 | 0.47329400  | 2.90611700  |
| H  | -3.34253200 | 0.19041300  | 3.93157700  |
| H  | -3.00999700 | 1.56455600  | 2.87723700  |
| H  | -3.87820600 | 0.16535000  | 2.23410300  |
| C  | -2.67608400 | -2.52094500 | 1.88627800  |
| H  | -2.72545400 | -3.17152000 | 2.76830900  |
| H  | -3.64929000 | -2.05294900 | 1.73594300  |
| H  | -2.47149900 | -3.15051800 | 1.01736200  |
| C  | 0.39327000  | -2.97898500 | 1.25294800  |
| H  | 0.54990200  | -3.68985500 | 2.07451000  |
| H  | -0.26893300 | -3.45367500 | 0.52335600  |
| H  | 1.35359800  | -2.81001800 | 0.76271200  |
| Co | -0.88457700 | -0.16775800 | 0.49778500  |
| C  | 5.86464700  | -1.76476000 | 0.93588200  |

|   |             |             |             |
|---|-------------|-------------|-------------|
| H | 6.85965300  | -1.49405500 | 1.30287400  |
| H | 5.13367900  | -1.54129600 | 1.71789600  |
| H | 5.83838600  | -2.84257800 | 0.75705800  |
| C | 6.60387100  | -1.29631500 | -1.43886600 |
| H | 6.63817700  | -2.36877100 | -1.65686300 |
| H | 6.38036800  | -0.76273600 | -2.36610500 |
| H | 7.59610200  | -0.98998100 | -1.09187400 |
| C | 5.53474000  | 0.53398100  | -0.06130900 |
| H | 4.75099000  | 0.79108500  | 0.65897500  |
| H | 6.49746600  | 0.83840800  | 0.36188900  |
| H | 5.36404300  | 1.10827700  | -0.97514000 |
| C | -3.40737100 | -3.25468400 | -1.98423000 |
| H | -3.81322400 | -3.68524900 | -1.06157700 |
| H | -3.81106200 | -3.82831400 | -2.82675200 |
| H | -2.32098900 | -3.37165600 | -1.96759100 |
| C | -5.31811100 | -1.61277600 | -2.10725400 |
| H | -5.75755200 | -2.16046400 | -2.94908500 |
| H | -5.74629600 | -1.99817600 | -1.17785600 |
| H | -5.60494900 | -0.56078100 | -2.18568300 |
| C | -3.20253300 | -1.19194400 | -3.41687100 |
| H | -3.45132000 | -0.12970700 | -3.52327600 |
| H | -2.11398900 | -1.28945200 | -3.42253300 |
| H | -3.60859200 | -1.72145700 | -4.28677500 |

<sup>35</sup>, -2907.78266226

|   |             |             |             |
|---|-------------|-------------|-------------|
| C | 0.41477700  | -0.29532800 | 1.97116200  |
| C | -0.32499500 | -1.54310100 | 1.88640300  |
| C | -1.66791600 | -1.25336000 | 2.18218200  |
| C | -1.77902200 | 0.16801900  | 2.46826300  |
| C | -0.49690400 | 0.74470700  | 2.37837400  |
| C | 2.57725600  | 3.37938600  | -1.14196200 |
| C | 1.56176200  | 4.30405300  | -1.01758300 |
| C | 0.22645200  | 3.85807500  | -0.82462400 |
| C | -0.01345400 | 2.45694500  | -0.77482400 |
| C | 1.02704100  | 1.49939300  | -0.98071700 |
| C | 2.31806600  | 1.98515500  | -1.12814900 |
| H | -0.75760800 | 5.78563300  | -0.67260600 |
| H | 3.60071800  | 3.72031800  | -1.27191900 |
| H | 1.76886400  | 5.37011200  | -1.04589300 |
| C | -0.89288300 | 4.70781500  | -0.63199800 |
| H | 3.13590500  | 1.28845400  | -1.27708600 |
| C | -2.26491500 | 2.75580200  | -0.28920700 |
| C | -2.13475500 | 4.16083000  | -0.38417700 |
| H | -3.20682200 | 2.27127300  | -0.05208100 |

|    |             |             |             |
|----|-------------|-------------|-------------|
| H  | -3.00642400 | 4.78946400  | -0.23554700 |
| N  | -1.23727200 | 1.94349200  | -0.46360900 |
| C  | 0.61139300  | 0.08090500  | -1.00912600 |
| H  | 1.39707400  | -0.64224800 | -0.79996200 |
| H  | 0.04905400  | -0.19002000 | -1.90695800 |
| H  | 3.01685800  | -1.12877000 | -2.35247900 |
| C  | 4.05198900  | -1.65086400 | -0.86812400 |
| C  | 5.39577700  | -1.39770000 | -0.18764100 |
| O  | 3.90750300  | -0.93526900 | -2.01180400 |
| O  | 3.17889200  | -2.39029300 | -0.46209100 |
| C  | -2.96195900 | -1.21424700 | -1.01999200 |
| C  | -4.06126500 | -1.95941400 | -1.79276900 |
| O  | -1.77153400 | -1.66236300 | -1.07588100 |
| O  | -3.22947700 | -0.17721100 | -0.34213600 |
| C  | 1.90577100  | -0.15973300 | 1.93003200  |
| H  | 2.21309200  | 0.77028000  | 1.44121500  |
| H  | 2.31410900  | -0.14387300 | 2.94956100  |
| H  | 2.36727100  | -0.99282000 | 1.39849900  |
| C  | -0.11593200 | 2.17495700  | 2.62745600  |
| H  | 0.20595000  | 2.33443400  | 3.66477900  |
| H  | 0.70954400  | 2.48444300  | 1.97956700  |
| H  | -0.95128500 | 2.85424800  | 2.43465400  |
| C  | -3.07218100 | 0.86066000  | 2.77351600  |
| H  | -3.47564200 | 0.54677000  | 3.74446400  |
| H  | -2.95121000 | 1.94685900  | 2.80107200  |
| H  | -3.81675000 | 0.61808400  | 2.00814800  |
| C  | -2.82277200 | -2.20811400 | 2.19101700  |
| H  | -3.13144100 | -2.45565200 | 3.21489800  |
| H  | -3.68517900 | -1.77050600 | 1.67972800  |
| H  | -2.56972000 | -3.14125300 | 1.68285900  |
| C  | 0.25378400  | -2.87955800 | 1.52352300  |
| H  | 0.55487300  | -3.44500100 | 2.41528100  |
| H  | -0.47679000 | -3.47948600 | 0.97440600  |
| H  | 1.13279400  | -2.77540000 | 0.88353000  |
| Co | -1.02995500 | -0.10453500 | 0.23008300  |
| C  | 5.45275400  | -2.21128200 | 1.11314200  |
| H  | 6.42261600  | -2.06377700 | 1.59855300  |
| H  | 4.66717500  | -1.90122400 | 1.80737800  |
| H  | 5.31823000  | -3.27782000 | 0.91619400  |
| C  | 6.52448000  | -1.83368300 | -1.14784400 |
| H  | 6.45605400  | -2.90208400 | -1.37746000 |
| H  | 6.48200200  | -1.27556600 | -2.08649300 |
| H  | 7.49626800  | -1.65060000 | -0.67794100 |
| C  | 5.52112500  | 0.11152200  | 0.11749000  |

|   |             |             |             |
|---|-------------|-------------|-------------|
| H | 4.69778400  | 0.45824500  | 0.75025400  |
| H | 6.45968400  | 0.29924100  | 0.64893700  |
| H | 5.52249000  | 0.70248800  | -0.80189800 |
| C | -4.06666100 | -3.42921900 | -1.32581700 |
| H | -4.32313500 | -3.50238700 | -0.26339300 |
| H | -4.80694100 | -4.00481400 | -1.89303400 |
| H | -3.08194500 | -3.88023500 | -1.47002900 |
| C | -5.43175100 | -1.31485600 | -1.54552600 |
| H | -6.20784900 | -1.85188500 | -2.10271700 |
| H | -5.68972900 | -1.33764300 | -0.48279000 |
| H | -5.43571000 | -0.26841400 | -1.86219400 |
| C | -3.70003700 | -1.89516300 | -3.29169800 |
| H | -3.68436100 | -0.85854100 | -3.64689100 |
| H | -2.71352500 | -2.33204700 | -3.46620700 |
| H | -4.43984600 | -2.44478900 | -3.88477100 |

55, -2907.77131543

|   |             |             |             |
|---|-------------|-------------|-------------|
| C | 0.27722200  | -0.49910800 | 1.85790700  |
| C | -0.33707000 | -1.74303300 | 1.49527500  |
| C | -1.69646800 | -1.69990700 | 1.94074000  |
| C | -1.92053300 | -0.43939700 | 2.57797300  |
| C | -0.70475000 | 0.30231300  | 2.52792100  |
| C | 3.03667800  | 3.00701500  | -1.09525600 |
| C | 2.13156800  | 3.95171800  | -0.63488800 |
| C | 0.77107200  | 3.59039600  | -0.41981100 |
| C | 0.33990900  | 2.25395000  | -0.67726400 |
| C | 1.26697000  | 1.29564600  | -1.27182100 |
| C | 2.62016000  | 1.71258200  | -1.41034500 |
| H | 0.11646100  | 5.53692300  | 0.26408300  |
| H | 4.07890700  | 3.27904300  | -1.23403200 |
| H | 2.44572300  | 4.96841200  | -0.41823000 |
| C | -0.18594000 | 4.51091300  | 0.07175800  |
| H | 3.33966200  | 1.00583600  | -1.80881000 |
| C | -1.80195000 | 2.74486800  | 0.09736800  |
| C | -1.48002600 | 4.09677500  | 0.30326000  |
| H | -2.78801100 | 2.34972400  | 0.31688600  |
| H | -2.23886900 | 4.77964400  | 0.66947100  |
| N | -0.91911100 | 1.85067600  | -0.35157900 |
| C | 0.85869300  | 0.04035700  | -1.71516500 |
| H | 1.59395900  | -0.68510700 | -2.04219300 |
| H | -0.18174600 | -0.25602700 | -1.77871200 |
| H | 4.16281600  | -1.07791400 | -2.94144300 |
| C | 4.41215400  | -1.53905200 | -1.13410100 |
| C | 5.40143100  | -1.40038000 | 0.01995800  |



|    |             |             |             |
|----|-------------|-------------|-------------|
| O  | 4.84529400  | -0.92229400 | -2.26691300 |
| O  | 3.33542200  | -2.09800400 | -1.09390900 |
| C  | -3.35087600 | -0.65311500 | -1.09277500 |
| C  | -4.52562500 | -1.09927200 | -1.96959400 |
| O  | -2.21169000 | -1.20664700 | -1.26648500 |
| O  | -3.49380800 | 0.23117500  | -0.19689500 |
| C  | 1.72633600  | -0.13925100 | 1.70142500  |
| H  | 1.86050900  | 0.92367900  | 1.47420600  |
| H  | 2.29115300  | -0.34380600 | 2.62189200  |
| H  | 2.19187900  | -0.70598500 | 0.89265300  |
| C  | -0.46061800 | 1.67912500  | 3.07607300  |
| H  | 0.01427000  | 1.64828400  | 4.06582000  |
| H  | 0.19932200  | 2.25885300  | 2.42126800  |
| H  | -1.39124500 | 2.24476600  | 3.17916300  |
| C  | -3.24125600 | 0.01120600  | 3.13458800  |
| H  | -3.54704400 | -0.59995300 | 3.99291700  |
| H  | -3.20309900 | 1.05095100  | 3.47153900  |
| H  | -4.02737900 | -0.06141300 | 2.37491500  |
| C  | -2.72899500 | -2.77475200 | 1.75793100  |
| H  | -2.81844900 | -3.41520500 | 2.64566600  |
| H  | -3.71641100 | -2.34033700 | 1.56828500  |
| H  | -2.48481700 | -3.41717800 | 0.90781300  |
| C  | 0.32397400  | -2.90763800 | 0.81117700  |
| H  | 0.53781500  | -3.72026300 | 1.51816000  |
| H  | -0.32081700 | -3.31805400 | 0.02684800  |
| H  | 1.26874200  | -2.62435800 | 0.34052800  |
| Co | -1.38726600 | -0.13991400 | 0.33447200  |
| C  | 4.94148000  | -2.29148700 | 1.18310700  |
| H  | 5.64603700  | -2.19896200 | 2.01555600  |
| H  | 3.94863100  | -2.00772500 | 1.53568500  |
| H  | 4.90011500  | -3.34149500 | 0.88021200  |
| C  | 6.81059300  | -1.81824400 | -0.45049900 |
| H  | 6.82464500  | -2.86350200 | -0.77645400 |
| H  | 7.15614900  | -1.19555900 | -1.27876200 |
| H  | 7.51628800  | -1.71527800 | 0.37998500  |
| C  | 5.41163700  | 0.08655500  | 0.44848400  |
| H  | 4.41601300  | 0.42027100  | 0.75416600  |
| H  | 6.09089400  | 0.21426700  | 1.29741600  |
| H  | 5.75556200  | 0.72808700  | -0.36763300 |
| C  | -4.74814400 | -2.60685500 | -1.72323900 |
| H  | -5.01965100 | -2.79801500 | -0.67947500 |
| H  | -5.56034600 | -2.97695500 | -2.35886700 |
| H  | -3.83940600 | -3.17078900 | -1.94721700 |
| C  | -5.79354900 | -0.30836800 | -1.62070100 |

|   |             |             |             |
|---|-------------|-------------|-------------|
| H | -6.62815300 | -0.63895300 | -2.24906900 |
| H | -6.06796200 | -0.45200600 | -0.57219900 |
| H | -5.64349200 | 0.76344400  | -1.77798300 |
| C | -4.13318300 | -0.86840900 | -3.44357300 |
| H | -3.96615000 | 0.19607100  | -3.64319400 |
| H | -3.21571400 | -1.41018400 | -3.68606500 |
| H | -4.93394900 | -1.21501100 | -4.10634800 |

MECP1, -2907.7814768

|   |             |             |             |
|---|-------------|-------------|-------------|
| C | 0.43920000  | -0.33720000 | 2.02990000  |
| C | -0.29490000 | -1.57720000 | 1.89150000  |
| C | -1.65510000 | -1.29340000 | 2.15810000  |
| C | -1.77140000 | 0.11120000  | 2.46860000  |
| C | -0.47630000 | 0.68540000  | 2.43110000  |
| C | 2.49780000  | 3.23470000  | -1.33300000 |
| C | 1.47580000  | 4.15000000  | -1.20690000 |
| C | 0.16170000  | 3.69850000  | -0.91550000 |
| C | -0.04960000 | 2.30160000  | -0.76100000 |
| C | 0.99340000  | 1.35010000  | -0.95680000 |
| C | 2.26200000  | 1.84170000  | -1.21790000 |
| H | -0.84770000 | 5.61690000  | -0.85490000 |
| H | 3.50500000  | 3.58060000  | -1.54690000 |
| H | 1.66110000  | 5.21470000  | -1.31570000 |
| C | -0.96260000 | 4.54290000  | -0.73530000 |
| H | 3.08000000  | 1.14810000  | -1.37720000 |
| C | -2.29240000 | 2.59760000  | -0.22240000 |
| C | -2.18460000 | 3.99380000  | -0.41230000 |
| H | -3.22340000 | 2.11340000  | 0.05140000  |
| H | -3.06290000 | 4.61640000  | -0.28040000 |
| N | -1.25590000 | 1.78920000  | -0.37470000 |
| C | 0.58970000  | -0.07730000 | -0.87740000 |
| H | 1.41580000  | -0.74690000 | -0.64340000 |
| H | 0.07710000  | -0.40930000 | -1.78470000 |
| C | -3.22050000 | -0.93120000 | -0.88420000 |
| C | -4.14080000 | -1.72670000 | -1.82870000 |
| O | -1.96810000 | -1.23290000 | -0.95030000 |
| O | -3.67900000 | -0.06440000 | -0.11530000 |
| C | 1.92870000  | -0.19230000 | 1.99770000  |
| H | 2.23980000  | 0.70890000  | 1.46020000  |
| H | 2.31830000  | -0.11320000 | 3.02070000  |
| H | 2.40470000  | -1.05180000 | 1.52540000  |
| C | -0.10840000 | 2.11270000  | 2.70230000  |
| H | 0.13620000  | 2.26880000  | 3.76060000  |
| H | 0.76490000  | 2.41540000  | 2.11710000  |

|    |             |             |             |
|----|-------------|-------------|-------------|
| H  | -0.92240000 | 2.79800000  | 2.45030000  |
| C  | -3.04410000 | 0.80920000  | 2.83290000  |
| H  | -3.31930000 | 0.59920000  | 3.87410000  |
| H  | -2.94570000 | 1.89410000  | 2.73430000  |
| H  | -3.86030000 | 0.48660000  | 2.18410000  |
| C  | -2.79020000 | -2.26830000 | 2.14250000  |
| H  | -2.97370000 | -2.67480000 | 3.14470000  |
| H  | -3.70760000 | -1.78890000 | 1.79710000  |
| H  | -2.58210000 | -3.10800000 | 1.47550000  |
| C  | 0.29610000  | -2.90950000 | 1.54450000  |
| H  | 0.63920000  | -3.43720000 | 2.44360000  |
| H  | -0.44190000 | -3.54700000 | 1.05000000  |
| H  | 1.15260000  | -2.80930000 | 0.87440000  |
| Co | -0.96320000 | -0.15260000 | 0.39040000  |
| C  | -4.02210000 | -3.22120000 | -1.47280000 |
| H  | -4.36650000 | -3.40900000 | -0.45020000 |
| H  | -4.63570000 | -3.82560000 | -2.15000000 |
| H  | -2.98380000 | -3.55290000 | -1.55020000 |
| C  | -5.59160000 | -1.25920000 | -1.67170000 |
| H  | -6.24870000 | -1.83270000 | -2.33460000 |
| H  | -5.93420000 | -1.39000000 | -0.64200000 |
| H  | -5.69040000 | -0.19780000 | -1.91560000 |
| C  | -3.65990000 | -1.50280000 | -3.27450000 |
| H  | -3.71770000 | -0.44310000 | -3.54650000 |
| H  | -2.62310000 | -1.82670000 | -3.39000000 |
| H  | -4.28530000 | -2.06600000 | -3.97590000 |
| H  | 2.99340000  | -1.38150000 | -2.21540000 |
| C  | 4.11880000  | -1.71780000 | -0.74780000 |
| C  | 5.47680000  | -1.34940000 | -0.15950000 |
| O  | 3.88770000  | -1.11570000 | -1.93990000 |
| O  | 3.30300000  | -2.46020000 | -0.24040000 |
| C  | 5.60510000  | -1.98670000 | 1.22960000  |
| H  | 6.59100000  | -1.75990000 | 1.64730000  |
| H  | 4.84450000  | -1.60190000 | 1.91410000  |
| H  | 5.48780000  | -3.07150000 | 1.17750000  |
| C  | 6.57560000  | -1.88790000 | -1.10030000 |
| H  | 6.51860000  | -2.97730000 | -1.18990000 |
| H  | 6.49000000  | -1.45400000 | -2.09910000 |
| H  | 7.55990000  | -1.63260000 | -0.69500000 |
| C  | 5.58400000  | 0.18560000  | -0.05560000 |
| H  | 4.77500000  | 0.60080000  | 0.55250000  |
| H  | 6.53430000  | 0.45200000  | 0.41800000  |
| H  | 5.54820000  | 0.65510000  | -1.04100000 |

ossTS7, -2802.34578334, i307.42

|   |             |             |             |
|---|-------------|-------------|-------------|
| C | -4.01288100 | 1.94108700  | 2.08066800  |
| C | -3.41155900 | 3.00342900  | 1.43890000  |
| C | -2.20721400 | 2.80360100  | 0.71158300  |
| C | -1.66569100 | 1.49100100  | 0.68000900  |
| C | -2.24053700 | 0.41865000  | 1.40300900  |
| C | -3.43021300 | 0.64667700  | 2.07096200  |
| H | -1.88785300 | 4.82673000  | -0.00668000 |
| H | -4.94051100 | 2.09549300  | 2.62240000  |
| H | -3.85499400 | 3.99381100  | 1.46834600  |
| C | -1.51603200 | 3.80613900  | -0.01356600 |
| H | -3.90282000 | -0.15862100 | 2.62534300  |
| C | 0.05624500  | 2.13297700  | -0.75268100 |
| C | -0.37978400 | 3.47394600  | -0.72247300 |
| H | 0.92450200  | 1.83988800  | -1.32860500 |
| H | 0.18029900  | 4.21840200  | -1.27639100 |
| N | -0.57553200 | 1.17255400  | -0.08866400 |
| C | -1.43089700 | -0.82521300 | 1.41398600  |
| C | -1.67512000 | -0.79187500 | -1.97413300 |
| C | -1.99349200 | -1.90433500 | -1.13629200 |
| C | -0.80785000 | -2.71280300 | -1.02391400 |
| C | -0.32543300 | -0.95687300 | -2.46214900 |
| C | 0.19466300  | -2.15258500 | -1.89520800 |
| H | -1.99152000 | -1.74407300 | 1.56957200  |
| H | -0.61417600 | -0.78378600 | 2.13342800  |
| C | -0.64413900 | -3.97258300 | -0.23540800 |
| H | -0.72712900 | -4.84395500 | -0.89597600 |
| H | 0.33077700  | -3.99776700 | 0.25426500  |
| H | -1.40490700 | -4.06358300 | 0.54121000  |
| C | -3.35257200 | -2.20950100 | -0.59132000 |
| H | -4.00398300 | -2.53867100 | -1.40876300 |
| H | -3.32404700 | -3.00906500 | 0.15004100  |
| H | -3.81403400 | -1.32954900 | -0.13488300 |
| C | -2.62332900 | 0.30262700  | -2.35244900 |
| H | -3.15802300 | 0.03454000  | -3.27097700 |
| H | -3.36597400 | 0.47097500  | -1.57012300 |
| H | -2.10241600 | 1.24493500  | -2.53436200 |
| C | 0.36849000  | -0.05663400 | -3.43753700 |
| H | 0.28219000  | -0.46019900 | -4.45295700 |
| H | -0.07327400 | 0.94161800  | -3.44568100 |
| H | 1.43166700  | 0.04488100  | -3.20899800 |
| C | 1.54947300  | -2.74671400 | -2.10347700 |
| H | 1.45677400  | -3.72484500 | -2.58778100 |
| H | 2.17679900  | -2.11692100 | -2.73648100 |

|    |             |             |             |
|----|-------------|-------------|-------------|
| H  | 2.05302000  | -2.89611800 | -1.14423000 |
| Co | -0.34724400 | -0.78597100 | -0.29921000 |
| C  | 2.20537600  | -0.34856700 | 1.10145100  |
| C  | 1.92525400  | -2.02365100 | 2.88892900  |
| O  | 2.31032900  | -2.25083000 | 3.98815100  |
| O  | 2.65909500  | -0.66289000 | 2.26044300  |
| O  | 1.15263200  | -2.44825500 | 2.01053700  |
| N  | 1.24990100  | -0.96828500 | 0.46390100  |
| C  | 2.83331800  | 0.79783600  | 0.38475400  |
| C  | 3.01368800  | 2.00751700  | 1.06689400  |
| C  | 3.20168900  | 0.67569000  | -0.96226700 |
| C  | 3.53259700  | 3.10649200  | 0.38297300  |
| H  | 2.74878000  | 2.07672400  | 2.11660400  |
| C  | 3.73550900  | 1.77559900  | -1.63404900 |
| H  | 3.08886600  | -0.28078600 | -1.45990900 |
| C  | 3.88745900  | 2.99426600  | -0.96534200 |
| H  | 3.67206200  | 4.04757100  | 0.90547000  |
| H  | 4.04312300  | 1.68067600  | -2.67089300 |
| H  | 4.30154700  | 3.85056000  | -1.48865400 |

<sup>1</sup>TS7, -2802.33465934, i348.75

|   |             |             |             |
|---|-------------|-------------|-------------|
| C | -4.01646600 | 1.93689800  | 2.07104100  |
| C | -3.42579800 | 2.99791400  | 1.41728700  |
| C | -2.21647500 | 2.80229400  | 0.69749700  |
| C | -1.66032900 | 1.49531300  | 0.68539800  |
| C | -2.22497600 | 0.42524900  | 1.41896900  |
| C | -3.41809400 | 0.64943700  | 2.08134400  |
| H | -1.91677300 | 4.81901400  | -0.04696400 |
| H | -4.94803700 | 2.08743700  | 2.60718500  |
| H | -3.88090600 | 3.98331900  | 1.43204100  |
| C | -1.53339700 | 3.80270100  | -0.03807900 |
| H | -3.88392700 | -0.15378400 | 2.64449700  |
| C | 0.06055200  | 2.13709300  | -0.74793000 |
| C | -0.39042200 | 3.47358800  | -0.73746600 |
| H | 0.93238900  | 1.84582000  | -1.31900400 |
| H | 0.16318800  | 4.21673900  | -1.29963000 |
| N | -0.56271200 | 1.17823200  | -0.07421900 |
| C | -1.39657800 | -0.80947800 | 1.44125600  |
| C | -1.66046000 | -0.76996600 | -1.95356300 |
| C | -1.97277800 | -1.88736800 | -1.12913400 |
| C | -0.78357600 | -2.69513100 | -1.02304900 |
| C | -0.30520400 | -0.92498500 | -2.43981100 |
| C | 0.21555400  | -2.12664200 | -1.88887400 |
| H | -1.94977500 | -1.73342000 | 1.59838100  |

|    |             |             |             |
|----|-------------|-------------|-------------|
| H  | -0.60593400 | -0.74475400 | 2.18824700  |
| C  | -0.63473300 | -3.97144200 | -0.25749600 |
| H  | -0.86604500 | -4.82781100 | -0.90250400 |
| H  | 0.38226300  | -4.08418300 | 0.11962500  |
| H  | -1.30743200 | -4.00450900 | 0.60116400  |
| C  | -3.32566600 | -2.20246400 | -0.57303800 |
| H  | -3.98036200 | -2.54307500 | -1.38305200 |
| H  | -3.28321500 | -2.99766200 | 0.17251500  |
| H  | -3.79177800 | -1.32494900 | -0.11708400 |
| C  | -2.61148600 | 0.32362900  | -2.32978000 |
| H  | -3.12375000 | 0.07131400  | -3.26527300 |
| H  | -3.37208400 | 0.46878600  | -1.56017900 |
| H  | -2.09651600 | 1.27498700  | -2.47981600 |
| C  | 0.38279900  | -0.01934100 | -3.41426900 |
| H  | 0.30899700  | -0.42914400 | -4.42830700 |
| H  | -0.07334300 | 0.97223900  | -3.43077300 |
| H  | 1.44317200  | 0.09876500  | -3.17984500 |
| C  | 1.57254200  | -2.71419800 | -2.10718900 |
| H  | 1.48237800  | -3.70125700 | -2.57284300 |
| H  | 2.18445000  | -2.09043800 | -2.76116200 |
| H  | 2.09321300  | -2.84352500 | -1.15386700 |
| Co | -0.34101700 | -0.77673200 | -0.27780700 |
| C  | 2.19137200  | -0.35536900 | 1.13442800  |
| C  | 1.87627400  | -2.10919400 | 2.87999800  |
| O  | 2.25110200  | -2.35316500 | 3.97328000  |
| O  | 2.64225000  | -0.66142800 | 2.28491000  |
| O  | 1.14462900  | -2.47186500 | 1.95090700  |
| N  | 1.22880400  | -0.96757600 | 0.48827600  |
| C  | 2.80701200  | 0.78090900  | 0.38592200  |
| C  | 2.95457000  | 2.01104100  | 1.03914100  |
| C  | 3.20345500  | 0.62539000  | -0.94919500 |
| C  | 3.47809600  | 3.09597300  | 0.33751200  |
| H  | 2.66449500  | 2.10588400  | 2.08008900  |
| C  | 3.73902900  | 1.71396800  | -1.63858500 |
| H  | 3.11028000  | -0.34409700 | -1.42435700 |
| C  | 3.86380200  | 2.95116100  | -0.99961300 |
| H  | 3.59685400  | 4.05200500  | 0.83742700  |
| H  | 4.06802300  | 1.59531900  | -2.66629500 |
| H  | 4.27944500  | 3.79792500  | -1.53694100 |

<sup>3</sup>TS7, -2802.30950473, i645.02

|   |            |            |             |
|---|------------|------------|-------------|
| C | 1.58719900 | 4.10127500 | -2.09400700 |
| C | 0.73259800 | 4.53623200 | -1.10254300 |
| C | 0.10513400 | 3.59290900 | -0.24498100 |

|    |             |             |             |
|----|-------------|-------------|-------------|
| C  | 0.39181400  | 2.21643000  | -0.45235000 |
| C  | 1.20790300  | 1.76589000  | -1.52080700 |
| C  | 1.82633000  | 2.71906800  | -2.31029200 |
| H  | -1.02344400 | 4.95480800  | 1.01261900  |
| H  | 2.07688400  | 4.82546400  | -2.73721500 |
| H  | 0.54338200  | 5.59523900  | -0.95677900 |
| C  | -0.76753100 | 3.91593500  | 0.82475900  |
| H  | 2.47289700  | 2.40892600  | -3.12578800 |
| C  | -0.89337900 | 1.57480500  | 1.37768800  |
| C  | -1.28077800 | 2.90972200  | 1.61826700  |
| H  | -1.24623100 | 0.76287100  | 2.00336600  |
| H  | -1.95781800 | 3.12639100  | 2.43674800  |
| N  | -0.07513700 | 1.24395900  | 0.38908500  |
| C  | 1.25661300  | 0.29217700  | -1.70524700 |
| C  | 2.28478500  | -0.03274200 | 1.78810000  |
| C  | 3.00324500  | -0.34931700 | 0.59224200  |
| C  | 2.67364100  | -1.70995900 | 0.22543100  |
| C  | 1.50579100  | -1.17763500 | 2.15547000  |
| C  | 1.77912700  | -2.22786500 | 1.22571700  |
| H  | 2.14873200  | -0.07694100 | -2.20897000 |
| H  | 0.36622600  | -0.07506000 | -2.22634100 |
| C  | 3.26612100  | -2.49525500 | -0.90217500 |
| H  | 4.09083600  | -3.11685700 | -0.53355600 |
| H  | 2.51966700  | -3.14810400 | -1.35682600 |
| H  | 3.66685500  | -1.84509900 | -1.68184700 |
| C  | 4.01677700  | 0.53554400  | -0.06084500 |
| H  | 4.93447100  | 0.55634400  | 0.53855100  |
| H  | 4.28227500  | 0.18244400  | -1.05828200 |
| H  | 3.65644800  | 1.56412000  | -0.15030700 |
| C  | 2.35216300  | 1.27726800  | 2.50592800  |
| H  | 3.22606500  | 1.30332700  | 3.16802400  |
| H  | 2.44726400  | 2.11039800  | 1.80443600  |
| H  | 1.46742000  | 1.45137700  | 3.12122000  |
| C  | 0.58208100  | -1.29618100 | 3.32805300  |
| H  | 1.06494000  | -1.83881100 | 4.14899700  |
| H  | 0.28381600  | -0.31845000 | 3.71302100  |
| H  | -0.31944900 | -1.85256300 | 3.05556700  |
| C  | 1.22966200  | -3.61528000 | 1.30292400  |
| H  | 1.72050800  | -4.16763800 | 2.11327500  |
| H  | 0.15630600  | -3.60045200 | 1.51074600  |
| H  | 1.38109100  | -4.15977200 | 0.37171200  |
| Co | 0.87323200  | -0.55983600 | 0.09263200  |
| C  | -1.95231600 | -1.38803300 | -0.70488100 |
| C  | -0.73053500 | -2.45972500 | -2.32607300 |

|   |             |             |             |
|---|-------------|-------------|-------------|
| O | -0.55956500 | -2.82386500 | -3.45260300 |
| O | -1.96383700 | -1.78925000 | -1.97619700 |
| O | 0.03153200  | -2.55374500 | -1.27614600 |
| N | -0.89332800 | -1.51065900 | 0.02716800  |
| C | -3.18547600 | -0.78785300 | -0.17649200 |
| C | -4.09184300 | -0.17972600 | -1.06008300 |
| C | -3.43754500 | -0.79652900 | 1.20674800  |
| C | -5.23610300 | 0.43208000  | -0.55278200 |
| H | -3.89557600 | -0.19263800 | -2.12644800 |
| C | -4.58658900 | -0.18819500 | 1.70110800  |
| H | -2.74770400 | -1.30472500 | 1.87282900  |
| C | -5.48281900 | 0.43131800  | 0.82296700  |
| H | -5.93951000 | 0.90251500  | -1.23210200 |
| H | -4.79475200 | -0.20959100 | 2.76615300  |
| H | -6.38105900 | 0.90168600  | 1.21084500  |

<sup>5</sup>TS7, -2802.27778876, *i*789.78

|   |             |             |             |
|---|-------------|-------------|-------------|
| C | 2.17699500  | 3.68356700  | -2.29585200 |
| C | 1.47618400  | 4.33535200  | -1.30331000 |
| C | 0.67875100  | 3.58837600  | -0.39536900 |
| C | 0.62090200  | 2.17335400  | -0.54640400 |
| C | 1.26953600  | 1.51207500  | -1.63476600 |
| C | 2.07396300  | 2.28098100  | -2.46477600 |
| H | -0.03354600 | 5.23482000  | 0.82208700  |
| H | 2.80039800  | 4.25175300  | -2.97890000 |
| H | 1.53608900  | 5.41384800  | -1.19436100 |
| C | -0.04167400 | 4.15725800  | 0.68390800  |
| H | 2.59842700  | 1.80346200  | -3.28715300 |
| C | -0.67553400 | 1.94433000  | 1.37393300  |
| C | -0.73776500 | 3.34095200  | 1.55265800  |
| H | -1.16293500 | 1.26982600  | 2.06943800  |
| H | -1.30310500 | 3.75009100  | 2.38239800  |
| N | -0.00832500 | 1.38031500  | 0.37541400  |
| C | 1.01264200  | 0.06755700  | -1.80257000 |
| C | 2.52212800  | -0.05435100 | 1.40311000  |
| C | 3.04332300  | -0.81883100 | 0.31295300  |
| C | 2.50646100  | -2.14791300 | 0.41168400  |
| C | 1.61991400  | -0.90008900 | 2.15102000  |
| C | 1.60681000  | -2.18221300 | 1.53569800  |
| H | 1.72704400  | -0.46323600 | -2.42975000 |
| H | -0.00960700 | -0.12407200 | -2.15650400 |
| C | 2.77236600  | -3.29929600 | -0.49858900 |
| H | 3.10102400  | -4.17260700 | 0.07575300  |
| H | 1.85661700  | -3.58968200 | -1.02743300 |



|    |             |             |             |
|----|-------------|-------------|-------------|
| H  | 3.54001200  | -3.06957300 | -1.23868600 |
| C  | 4.06871900  | -0.34175200 | -0.66447000 |
| H  | 5.06743100  | -0.35683900 | -0.21164000 |
| H  | 4.09965800  | -0.96928800 | -1.55715100 |
| H  | 3.86838000  | 0.68565900  | -0.98063400 |
| C  | 2.90531000  | 1.35097500  | 1.73712800  |
| H  | 3.78655200  | 1.35836700  | 2.39092800  |
| H  | 3.15865200  | 1.91988700  | 0.83956600  |
| H  | 2.10508100  | 1.87975200  | 2.25950400  |
| C  | 0.88045800  | -0.52150900 | 3.39668600  |
| H  | 1.40861600  | -0.88664200 | 4.28564200  |
| H  | 0.78239100  | 0.56141400  | 3.49615900  |
| H  | -0.12091700 | -0.96290000 | 3.41290900  |
| C  | 0.84584000  | -3.38775200 | 1.99210800  |
| H  | 1.46574800  | -4.00601600 | 2.65282600  |
| H  | -0.05244700 | -3.10632900 | 2.54614600  |
| H  | 0.53924000  | -4.00133200 | 1.14280700  |
| Co | 0.65549200  | -0.65566800 | 0.09164200  |
| C  | -2.23449200 | -1.29562000 | -0.54204000 |
| C  | -1.14746400 | -2.70139100 | -1.97938600 |
| O  | -1.00284000 | -3.25561100 | -3.02662600 |
| O  | -2.29688800 | -1.87135300 | -1.74767400 |
| O  | -0.39098500 | -2.71371300 | -0.90668600 |
| N  | -1.17174100 | -1.45505500 | 0.18458600  |
| C  | -3.37643800 | -0.49161100 | -0.10651100 |
| C  | -4.28021900 | 0.00669300  | -1.06016100 |
| C  | -3.54671600 | -0.19806100 | 1.25912900  |
| C  | -5.34073900 | 0.80731700  | -0.64326300 |
| H  | -4.14646600 | -0.23512300 | -2.10866100 |
| C  | -4.61272800 | 0.59741600  | 1.66305700  |
| H  | -2.86276200 | -0.62291700 | 1.98684100  |
| C  | -5.50647400 | 1.10446500  | 0.71249000  |
| H  | -6.04207100 | 1.19392200  | -1.37539300 |
| H  | -4.75978700 | 0.81145800  | 2.71684500  |
| H  | -6.34020300 | 1.72224800  | 1.03142200  |

oss8, -2613.69000163

|   |            |            |             |
|---|------------|------------|-------------|
| C | 3.33510500 | 1.27650500 | 2.00209700  |
| C | 3.24529800 | 2.29795800 | 1.08049200  |
| C | 2.06032700 | 2.45805300 | 0.31610000  |
| C | 0.98877100 | 1.55418100 | 0.55671400  |
| C | 1.06358100 | 0.54294800 | 1.53803800  |
| C | 2.24901200 | 0.39480000 | 2.23255500  |
| H | 2.67574300 | 4.12769800 | -0.92332300 |

|    |             |             |             |
|----|-------------|-------------|-------------|
| H  | 4.25235000  | 1.13825100  | 2.56510600  |
| H  | 4.08130800  | 2.96877100  | 0.90932200  |
| C  | 1.88483400  | 3.41310000  | -0.71403300 |
| H  | 2.35064700  | -0.40060800 | 2.96431000  |
| C  | -0.26956800 | 2.44929900  | -1.19285500 |
| C  | 0.72312100  | 3.41183600  | -1.46075700 |
| H  | -1.16817800 | 2.39004200  | -1.79437200 |
| H  | 0.56712100  | 4.12151000  | -2.26510000 |
| N  | -0.14683000 | 1.55861700  | -0.21397500 |
| C  | -0.17510900 | -0.26693200 | 1.72985500  |
| C  | -3.20249000 | 0.88143200  | -0.12104300 |
| C  | -3.06875800 | 0.16274300  | 1.11062400  |
| C  | -2.81404400 | -1.20967500 | 0.78588500  |
| C  | -3.08327200 | -0.04500500 | -1.21326000 |
| C  | -2.85453800 | -1.33457900 | -0.66118700 |
| H  | -0.80908300 | 0.17047300  | 2.50222400  |
| H  | 0.00430200  | -1.32237800 | 1.93585400  |
| C  | -2.63527000 | -2.36109700 | 1.72273800  |
| H  | -3.53789400 | -2.98279500 | 1.72757600  |
| H  | -1.79369900 | -2.98252400 | 1.40274200  |
| H  | -2.45095300 | -2.02629600 | 2.74474500  |
| C  | -3.26663100 | 0.75898300  | 2.46940300  |
| H  | -2.94355100 | 0.08369300  | 3.26329400  |
| H  | -2.72605100 | 1.70414900  | 2.57882700  |
| H  | -4.32984100 | 0.96993600  | 2.63250500  |
| C  | -3.50803600 | 2.34420100  | -0.20237100 |
| H  | -4.53512600 | 2.52224000  | 0.13723200  |
| H  | -2.84663400 | 2.92716500  | 0.44449600  |
| H  | -3.42963800 | 2.73136400  | -1.21924500 |
| C  | -3.16184000 | 0.26254300  | -2.67825600 |
| H  | -2.32854500 | -0.19562400 | -3.21929300 |
| H  | -4.08909400 | -0.13467400 | -3.10560700 |
| H  | -3.14718800 | 1.33682500  | -2.87345900 |
| C  | -2.68940200 | -2.61182600 | -1.41718200 |
| H  | -3.65466400 | -3.12914000 | -1.48010100 |
| H  | -2.33439900 | -2.42824100 | -2.43256100 |
| H  | -1.97362100 | -3.26978800 | -0.92128500 |
| Co | -1.21693100 | -0.08800800 | 0.00309400  |
| C  | 0.84893700  | -2.06032200 | -0.40040600 |
| O  | 0.45500500  | -3.07213900 | 0.20217100  |
| N  | -0.10603000 | -1.20614000 | -0.88163600 |
| C  | 2.27723900  | -1.73978900 | -0.63960900 |
| C  | 3.25331200  | -2.54274200 | -0.03345100 |
| C  | 2.65653200  | -0.62294300 | -1.39994200 |

|   |            |             |             |
|---|------------|-------------|-------------|
| C | 4.60055900 | -2.22115800 | -0.17703000 |
| H | 2.93525700 | -3.40384000 | 0.54509600  |
| C | 4.00494000 | -0.30423900 | -1.53924200 |
| H | 1.89584700 | -0.01440200 | -1.88003800 |
| C | 4.97657800 | -1.10142600 | -0.92640000 |
| H | 5.35872700 | -2.84120100 | 0.29111200  |
| H | 4.30083200 | 0.55815300  | -2.12866000 |
| H | 6.02802200 | -0.85384900 | -1.03788700 |

<sup>18</sup>, -2613.6902545

|   |             |             |             |
|---|-------------|-------------|-------------|
| C | -1.02173000 | 3.87616600  | 2.04189800  |
| C | -1.17283400 | 4.25519700  | 0.72406800  |
| C | -0.96131800 | 3.30950500  | -0.31516300 |
| C | -0.60478200 | 1.98964600  | 0.06296400  |
| C | -0.37038000 | 1.62115600  | 1.40830700  |
| C | -0.61118000 | 2.56270400  | 2.39194700  |
| H | -1.35903400 | 4.56509600  | -2.04118800 |
| H | -1.19696200 | 4.59922200  | 2.83206800  |
| H | -1.46369000 | 5.26914700  | 0.46773600  |
| C | -1.09774800 | 3.56641900  | -1.70316200 |
| H | -0.44956500 | 2.31163200  | 3.43609200  |
| C | -0.59785800 | 1.24600600  | -2.14860700 |
| C | -0.89014800 | 2.54768400  | -2.61055700 |
| H | -0.43341400 | 0.41855300  | -2.82578600 |
| H | -0.96455200 | 2.71941900  | -3.67822700 |
| N | -0.49269400 | 0.97770000  | -0.85345100 |
| C | 0.20300800  | 0.25844500  | 1.57889400  |
| C | -2.67277600 | -0.78341900 | 0.06142600  |
| C | -2.18626500 | -1.26864800 | 1.29926400  |
| C | -1.37227100 | -2.44172600 | 1.02781900  |
| C | -2.19725600 | -1.66358700 | -0.98249200 |
| C | -1.45006200 | -2.72193100 | -0.36648700 |
| H | -0.00310600 | -0.21053300 | 2.53937300  |
| H | 1.27854800  | 0.25861000  | 1.39788200  |
| C | -0.66997200 | -3.27963100 | 2.04915700  |
| H | -1.36654700 | -3.99558100 | 2.50147000  |
| H | 0.14688200  | -3.84437500 | 1.59597700  |
| H | -0.25593500 | -2.66807100 | 2.85445400  |
| C | -2.55996000 | -0.74417200 | 2.64941800  |
| H | -3.59133500 | -1.03501700 | 2.87899800  |
| H | -1.92200400 | -1.15103300 | 3.43570700  |
| H | -2.50771500 | 0.34702800  | 2.68970700  |
| C | -3.55638700 | 0.41059000  | -0.12894800 |
| H | -4.60795500 | 0.10320600  | -0.15639600 |

|    |             |             |             |
|----|-------------|-------------|-------------|
| H  | -3.43697200 | 1.12686100  | 0.68629600  |
| H  | -3.33803300 | 0.92704900  | -1.06642200 |
| C  | -2.52204400 | -1.55446500 | -2.43892400 |
| H  | -3.37715100 | -2.19745300 | -2.67954000 |
| H  | -2.79378300 | -0.53422400 | -2.71524100 |
| H  | -1.68150500 | -1.87004700 | -3.06130800 |
| C  | -0.78753900 | -3.87228900 | -1.05061000 |
| H  | -0.95549000 | -3.85319600 | -2.12819600 |
| H  | 0.29243200  | -3.84089400 | -0.87630900 |
| H  | -1.17377700 | -4.81831600 | -0.65774800 |
| Co | -0.50614200 | -0.79208900 | -0.00951200 |
| C  | 1.97929500  | -0.71273000 | -1.23460800 |
| O  | 1.80165200  | -0.41213500 | -2.42447100 |
| N  | 0.96715400  | -1.39678100 | -0.61889400 |
| C  | 3.21855100  | -0.43285500 | -0.47246800 |
| C  | 4.13978000  | 0.47471400  | -1.01441200 |
| C  | 3.46878400  | -1.03771500 | 0.77032700  |
| C  | 5.29915500  | 0.78501100  | -0.30851300 |
| H  | 3.93028100  | 0.91776900  | -1.98250300 |
| C  | 4.63212800  | -0.72497000 | 1.47066300  |
| H  | 2.76562700  | -1.76465900 | 1.16746800  |
| C  | 5.54430900  | 0.18792900  | 0.93280000  |
| H  | 6.01466100  | 1.48762400  | -0.72398300 |
| H  | 4.83481300  | -1.19806200 | 2.42639500  |
| H  | 6.45167400  | 0.42908800  | 1.47821700  |

<sup>38</sup>, -2613.68833716

|   |             |             |             |
|---|-------------|-------------|-------------|
| C | -4.04745600 | -2.35364300 | -1.70721600 |
| C | -4.04879600 | -2.78470300 | -0.39696400 |
| C | -3.04422400 | -2.33021400 | 0.49957600  |
| C | -2.07245400 | -1.42936300 | -0.00791100 |
| C | -2.01669100 | -1.05728200 | -1.37303000 |
| C | -3.02986000 | -1.49724600 | -2.20519100 |
| H | -3.65613600 | -3.38051200 | 2.29780600  |
| H | -4.82471500 | -2.69303100 | -2.38445200 |
| H | -4.81683600 | -3.46120300 | -0.03532200 |
| C | -2.94260100 | -2.68295800 | 1.86885600  |
| H | -3.02544600 | -1.22540100 | -3.25654800 |
| C | -1.05242400 | -1.19947000 | 2.07514500  |
| C | -1.93621900 | -2.14116200 | 2.64335600  |
| H | -0.27240100 | -0.72282100 | 2.65791100  |
| H | -1.82275300 | -2.40780100 | 3.68789200  |
| N | -1.14527200 | -0.83846700 | 0.80392700  |
| C | -0.79127300 | -0.31166700 | -1.76167800 |

|    |             |             |             |
|----|-------------|-------------|-------------|
| C  | -1.82690800 | 2.02949300  | 0.49966200  |
| C  | -1.46436200 | 2.29317000  | -0.85212300 |
| C  | -0.05701100 | 2.60602800  | -0.87190000 |
| C  | -0.67605400 | 2.26761400  | 1.33662000  |
| C  | 0.40326300  | 2.65317100  | 0.49455900  |
| H  | -0.89578200 | 0.32320400  | -2.63902100 |
| H  | 0.05066800  | -0.99565600 | -1.87356600 |
| C  | 0.74971700  | 2.95826900  | -2.08289300 |
| H  | 0.70240500  | 4.03645000  | -2.27595900 |
| H  | 1.79880400  | 2.68496200  | -1.95358300 |
| H  | 0.37964000  | 2.44371700  | -2.97207700 |
| C  | -2.41431000 | 2.33817200  | -2.00709900 |
| H  | -3.05400600 | 3.22349500  | -1.91846100 |
| H  | -1.89212400 | 2.40461900  | -2.96274700 |
| H  | -3.06709200 | 1.46095400  | -2.03013500 |
| C  | -3.19052400 | 1.63449200  | 0.97432300  |
| H  | -3.76358400 | 2.52326200  | 1.26273900  |
| H  | -3.74796100 | 1.11461700  | 0.19263900  |
| H  | -3.13738000 | 0.97785800  | 1.84585100  |
| C  | -0.64372400 | 2.17772700  | 2.83089900  |
| H  | -0.87823600 | 3.15166400  | 3.27645500  |
| H  | -1.37958200 | 1.46376100  | 3.20738700  |
| H  | 0.34299900  | 1.87928700  | 3.19436300  |
| C  | 1.77776000  | 3.03026800  | 0.94713400  |
| H  | 1.79046400  | 4.08117200  | 1.25882500  |
| H  | 2.09888400  | 2.42596100  | 1.79871200  |
| H  | 2.50984000  | 2.91293400  | 0.14685200  |
| Co | -0.22916200 | 0.66479400  | -0.06292300 |
| C  | 2.07379900  | -1.18252800 | -0.22710500 |
| O  | 1.41899400  | -2.19718400 | -0.51087300 |
| N  | 1.36794600  | -0.04208500 | 0.05054700  |
| C  | 3.55307800  | -1.14137100 | -0.16232000 |
| C  | 4.26956000  | -2.28864100 | -0.53424600 |
| C  | 4.23686800  | 0.01018300  | 0.25516700  |
| C  | 5.66086500  | -2.27896000 | -0.49199300 |
| H  | 3.72101000  | -3.16914100 | -0.85177800 |
| C  | 5.62877600  | 0.01508400  | 0.29714600  |
| H  | 3.67659100  | 0.89020000  | 0.55400300  |
| C  | 6.34053700  | -1.12873500 | -0.07750400 |
| H  | 6.21759500  | -3.16477800 | -0.78094000 |
| H  | 6.15999700  | 0.90399400  | 0.62291300  |
| H  | 7.42585800  | -1.12423400 | -0.04480100 |

58, -2613.65262534

|   |             |             |             |
|---|-------------|-------------|-------------|
| C | -4.34397300 | -1.77640600 | -1.85462200 |
| C | -4.51250900 | -2.22923200 | -0.56240200 |
| C | -3.48529900 | -2.03368200 | 0.39978900  |
| C | -2.28959700 | -1.38440100 | -0.01150700 |
| C | -2.07731700 | -1.00989200 | -1.37452400 |
| C | -3.13476400 | -1.16339800 | -2.26246200 |
| H | -4.47894400 | -2.91250700 | 2.11677300  |
| H | -5.13829800 | -1.90969600 | -2.58187100 |
| H | -5.43423700 | -2.71790700 | -0.26170400 |
| C | -3.58770200 | -2.40003000 | 1.76611400  |
| H | -3.01024300 | -0.86523900 | -3.29915300 |
| C | -1.44696400 | -1.37330500 | 2.15542600  |
| C | -2.56286700 | -2.09237400 | 2.63663700  |
| H | -0.64738000 | -1.06335000 | 2.82120300  |
| H | -2.61054600 | -2.36583000 | 3.68465300  |
| N | -1.32872500 | -1.01730900 | 0.88597700  |
| C | -0.73147600 | -0.55676800 | -1.77347600 |
| C | -1.72161200 | 2.05308900  | 0.36782200  |
| C | -1.12901400 | 2.28218800  | -0.93779800 |
| C | 0.25639500  | 2.65315600  | -0.74510100 |
| C | -0.70467700 | 2.21643100  | 1.33004000  |
| C | 0.52280700  | 2.58915400  | 0.63999200  |
| H | -0.68716600 | -0.00690700 | -2.71137100 |
| H | 0.02485400  | -1.33965500 | -1.69707600 |
| C | 1.21839200  | 3.01248900  | -1.83797600 |
| H | 1.12605700  | 4.07109900  | -2.10788000 |
| H | 2.25305200  | 2.83495200  | -1.53690900 |
| H | 1.03311600  | 2.42685400  | -2.74258100 |
| C | -1.89844000 | 2.39843400  | -2.21429100 |
| H | -2.40826000 | 3.36898400  | -2.24880500 |
| H | -1.24796200 | 2.33886000  | -3.08928600 |
| H | -2.66615600 | 1.62449100  | -2.29613400 |
| C | -3.16685100 | 1.74794300  | 0.61983900  |
| H | -3.74153700 | 2.67466100  | 0.73300800  |
| H | -3.60823800 | 1.18542400  | -0.20591400 |
| H | -3.30089400 | 1.16286500  | 1.53295100  |
| C | -0.83835000 | 2.07651900  | 2.81474800  |
| H | -0.97353000 | 3.05900300  | 3.28334800  |
| H | -1.69978300 | 1.46237900  | 3.08619100  |
| H | 0.05612100  | 1.62908800  | 3.25788800  |
| C | 1.81631500  | 2.89274300  | 1.32837700  |
| H | 1.75463000  | 3.86025600  | 1.84082100  |
| H | 2.05358800  | 2.13906800  | 2.08471100  |

|    |             |             |             |
|----|-------------|-------------|-------------|
| H  | 2.64774000  | 2.94446900  | 0.62341900  |
| Co | -0.13991200 | 0.51523700  | -0.09901900 |
| C  | 2.21248600  | -1.40850600 | -0.16515300 |
| O  | 1.61638000  | -2.44132200 | -0.50943600 |
| N  | 1.42641500  | -0.33331100 | 0.16266500  |
| C  | 3.68362300  | -1.26986300 | -0.10712000 |
| C  | 4.47859700  | -2.34173900 | -0.54082800 |
| C  | 4.28411300  | -0.09181200 | 0.36470100  |
| C  | 5.86528300  | -2.23171300 | -0.50357900 |
| H  | 3.99315900  | -3.24323800 | -0.89960800 |
| C  | 5.67208500  | 0.01310000  | 0.40022300  |
| H  | 3.66231300  | 0.72851100  | 0.70919900  |
| C  | 6.46185800  | -1.05579400 | -0.03466000 |
| H  | 6.48374300  | -3.05858200 | -0.83792400 |
| H  | 6.14012600  | 0.92095900  | 0.76779700  |
| H  | 7.54418900  | -0.97348800 | -0.00648100 |

oss<sup>TS9</sup>, -2613.68878193, *i*244.46

|   |             |             |             |
|---|-------------|-------------|-------------|
| C | -3.76960900 | -2.76796100 | -1.84148500 |
| C | -4.04502600 | -2.89947200 | -0.49784200 |
| C | -3.35776900 | -2.09562800 | 0.44878500  |
| C | -2.41534600 | -1.14271300 | -0.03406500 |
| C | -2.15676800 | -0.99664500 | -1.41524900 |
| C | -2.81698000 | -1.82554800 | -2.30282500 |
| H | -4.22966000 | -2.91980600 | 2.25483700  |
| H | -4.28162900 | -3.39619200 | -2.56310000 |
| H | -4.76818400 | -3.62873700 | -0.14621700 |
| C | -3.51770600 | -2.20562700 | 1.85126900  |
| H | -2.61141100 | -1.74928300 | -3.36635600 |
| C | -1.82721400 | -0.51865000 | 2.13178000  |
| C | -2.75183400 | -1.42288900 | 2.68953600  |
| H | -1.19098200 | 0.08451000  | 2.76679100  |
| H | -2.83486400 | -1.49683200 | 3.76779400  |
| N | -1.67335600 | -0.36688100 | 0.82214400  |
| C | -1.19230200 | 0.06065100  | -1.81950300 |
| C | -0.69011200 | 2.51304600  | 1.08149800  |
| C | -0.87636800 | 2.75577000  | -0.30868200 |
| C | 0.38122000  | 2.50810400  | -0.97586600 |
| C | 0.66102500  | 2.07639500  | 1.28732700  |
| C | 1.33342100  | 2.11573000  | 0.01409500  |
| H | -1.67784400 | 1.00719800  | -2.05436900 |
| H | -0.50021100 | -0.21763900 | -2.61094100 |
| C | 0.68379700  | 2.66752900  | -2.43269600 |
| H | 1.29799000  | 3.56160800  | -2.58873000 |

|    |             |             |             |
|----|-------------|-------------|-------------|
| H  | 1.23680300  | 1.80050500  | -2.80394100 |
| H  | -0.22387900 | 2.77924700  | -3.02776600 |
| C  | -2.14379600 | 3.27318200  | -0.91764700 |
| H  | -2.12656500 | 3.22666800  | -2.00783900 |
| H  | -3.01550600 | 2.71489800  | -0.56330500 |
| H  | -2.29166900 | 4.32305000  | -0.63960300 |
| C  | -1.74431300 | 2.73731000  | 2.12120600  |
| H  | -1.94813300 | 3.81099500  | 2.20221100  |
| H  | -2.68397400 | 2.24559400  | 1.85564600  |
| H  | -1.43699800 | 2.38864400  | 3.10805500  |
| C  | 1.31720600  | 1.71593700  | 2.58503500  |
| H  | 1.96477800  | 0.84241000  | 2.46835600  |
| H  | 1.94128600  | 2.54597800  | 2.93637000  |
| H  | 0.58864000  | 1.50132000  | 3.36952100  |
| C  | 2.79705000  | 1.91233100  | -0.21271900 |
| H  | 3.30998100  | 2.87520300  | -0.10018300 |
| H  | 3.23008200  | 1.21438800  | 0.50510800  |
| H  | 3.00027600  | 1.53986000  | -1.21793100 |
| Co | -0.26187300 | 0.71175300  | -0.05276600 |
| C  | 1.77319900  | -0.82807600 | -1.19576600 |
| O  | 1.89471200  | -0.49051700 | -2.38065200 |
| N  | 0.58415200  | -0.72311000 | -0.52378700 |
| C  | 2.88804400  | -1.41666300 | -0.39205500 |
| C  | 4.15380400  | -1.49193900 | -0.98858200 |
| C  | 2.71205900  | -1.82549500 | 0.94030900  |
| C  | 5.23820200  | -1.96784300 | -0.25492900 |
| H  | 4.26403200  | -1.17282900 | -2.01951500 |
| C  | 3.80184200  | -2.29480600 | 1.67120100  |
| H  | 1.72432800  | -1.78904800 | 1.39035200  |
| C  | 5.06469900  | -2.36493500 | 1.07456300  |
| H  | 6.21829500  | -2.03012300 | -0.71744000 |
| H  | 3.66778100  | -2.61672100 | 2.69939800  |
| H  | 5.91200900  | -2.73468900 | 1.64402700  |

<sup>1</sup>TS9, -2613.6845563, *i*211.26

|   |             |            |             |
|---|-------------|------------|-------------|
| C | -0.49517500 | 4.62296600 | -0.94637600 |
| C | -1.23768400 | 4.37258100 | 0.18742800  |
| C | -1.21287300 | 3.08362700 | 0.77894200  |
| C | -0.37223000 | 2.09200300 | 0.19636300  |
| C | 0.36760600  | 2.34651000 | -0.97855800 |
| C | 0.28621800  | 3.60508300 | -1.54570000 |
| H | -2.65691700 | 3.43203100 | 2.35748500  |
| H | -0.52476300 | 5.60485800 | -1.40732900 |
| H | -1.86244800 | 5.14446200 | 0.62592400  |



|    |             |             |             |
|----|-------------|-------------|-------------|
| C  | -2.00252800 | 2.70150400  | 1.89065100  |
| H  | 0.81599300  | 3.81494100  | -2.47002500 |
| C  | -1.09001600 | 0.48285100  | 1.72756400  |
| C  | -1.95661500 | 1.40164700  | 2.34954000  |
| H  | -1.03893800 | -0.54756800 | 2.05526300  |
| H  | -2.57343100 | 1.06930600  | 3.17639500  |
| N  | -0.30365800 | 0.82141200  | 0.71293100  |
| C  | 1.13353900  | 1.22072100  | -1.59239800 |
| C  | 2.20224000  | -0.54775000 | 1.58757900  |
| C  | 3.01366900  | -0.11671900 | 0.50896900  |
| C  | 2.93306800  | -1.12178500 | -0.53877700 |
| C  | 1.57840600  | -1.79232500 | 1.21164400  |
| C  | 2.08191400  | -2.16164400 | -0.08864600 |
| H  | 2.21597900  | 1.31546000  | -1.55529300 |
| H  | 0.81823000  | 1.02024600  | -2.61424700 |
| C  | 3.65760300  | -1.11730400 | -1.84878900 |
| H  | 4.57047800  | -1.71972200 | -1.77448200 |
| H  | 3.03783600  | -1.54733300 | -2.63930100 |
| H  | 3.95355000  | -0.11243700 | -2.15576700 |
| C  | 3.86740200  | 1.11501600  | 0.50361800  |
| H  | 4.75802300  | 0.95935100  | 1.12291300  |
| H  | 4.21316800  | 1.37049600  | -0.49987800 |
| H  | 3.33056200  | 1.97750600  | 0.90832200  |
| C  | 2.03234400  | 0.18108500  | 2.88444900  |
| H  | 2.84935800  | -0.07874800 | 3.56711300  |
| H  | 2.05264600  | 1.26375900  | 2.73893000  |
| H  | 1.09470200  | -0.07445100 | 3.38070200  |
| C  | 0.66468100  | -2.64012500 | 2.04526500  |
| H  | 1.15916000  | -3.58317300 | 2.30379900  |
| H  | 0.39516500  | -2.14889900 | 2.98195700  |
| H  | -0.25499500 | -2.88765900 | 1.50509900  |
| C  | 1.73684200  | -3.39438100 | -0.86299300 |
| H  | 2.63313600  | -4.00025400 | -1.03206400 |
| H  | 1.00915100  | -4.01007700 | -0.33165300 |
| H  | 1.31851700  | -3.12926500 | -1.83851100 |
| Co | 0.98208900  | -0.33391800 | -0.17050300 |
| C  | -1.33283400 | -0.35403200 | -1.71027900 |
| O  | -1.63374500 | 0.64171000  | -2.35903900 |
| N  | -0.04378800 | -0.78950700 | -1.46635600 |
| C  | -2.34716200 | -1.24988900 | -1.05328600 |
| C  | -3.58207500 | -0.67211400 | -0.72884800 |
| C  | -2.08119900 | -2.58340300 | -0.70432100 |
| C  | -4.53873000 | -1.42046000 | -0.04527700 |
| H  | -3.77114800 | 0.35448500  | -1.02444000 |

|   |             |             |             |
|---|-------------|-------------|-------------|
| C | -3.04486400 | -3.32837900 | -0.02453500 |
| H | -1.13939000 | -3.03797900 | -0.99066300 |
| C | -4.27023300 | -2.74570500 | 0.31183600  |
| H | -5.49713100 | -0.97436400 | 0.20229500  |
| H | -2.84841800 | -4.36601800 | 0.22822300  |
| H | -5.02030700 | -3.32764000 | 0.83871700  |

<sup>3</sup>TS9, -2613.68072205, *i*278.28

|   |             |             |             |
|---|-------------|-------------|-------------|
| C | -3.25352700 | -3.51441600 | -1.36737600 |
| C | -3.82200700 | -3.25838100 | -0.13884800 |
| C | -3.42338800 | -2.11576900 | 0.60482600  |
| C | -2.46248700 | -1.23430600 | 0.03219000  |
| C | -1.91621800 | -1.48290700 | -1.25163500 |
| C | -2.28882300 | -2.63672400 | -1.91930500 |
| H | -4.62554600 | -2.47030700 | 2.37360100  |
| H | -3.54074700 | -4.40060900 | -1.92373200 |
| H | -4.55538900 | -3.93583300 | 0.28744300  |
| C | -3.88726900 | -1.82251200 | 1.90969300  |
| H | -1.85082400 | -2.86051600 | -2.88722800 |
| C | -2.40599800 | 0.06833700  | 1.96264900  |
| C | -3.37820500 | -0.73432500 | 2.58754300  |
| H | -1.96256700 | 0.90500200  | 2.48696300  |
| H | -3.69673300 | -0.49389000 | 3.59536000  |
| N | -1.96921100 | -0.15615600 | 0.72643800  |
| C | -0.99053600 | -0.47989900 | -1.80910400 |
| C | -0.83319100 | 2.78623800  | 0.53572500  |
| C | -0.82060300 | 2.70217200  | -0.90415700 |
| C | 0.47499500  | 2.30092700  | -1.29364400 |
| C | 0.47458400  | 2.47821300  | 1.04354500  |
| C | 1.28983900  | 2.17196800  | -0.07049900 |
| H | -1.48028300 | 0.42347600  | -2.17204500 |
| H | -0.23168500 | -0.83768300 | -2.49607400 |
| C | 1.01266100  | 2.12440500  | -2.67738700 |
| H | 1.73382300  | 2.91887200  | -2.90196100 |
| H | 1.52579100  | 1.16352300  | -2.78083100 |
| H | 0.21999300  | 2.17156900  | -3.42604800 |
| C | -1.99487500 | 3.01648000  | -1.78261600 |
| H | -1.81404900 | 2.72787000  | -2.81988800 |
| H | -2.90094700 | 2.50478300  | -1.44135700 |
| H | -2.20601600 | 4.09175000  | -1.77561900 |
| C | -2.00429600 | 3.28380200  | 1.32070800  |
| H | -2.13954000 | 4.35320200  | 1.11710300  |
| H | -2.93169000 | 2.78361000  | 1.02818100  |
| H | -1.86561100 | 3.17412700  | 2.39756000  |

|    |             |             |             |
|----|-------------|-------------|-------------|
| C  | 0.91127500  | 2.49138400  | 2.47859800  |
| H  | 1.68276600  | 1.73898100  | 2.66130600  |
| H  | 1.32807600  | 3.46696600  | 2.75455600  |
| H  | 0.08042900  | 2.28807900  | 3.15928300  |
| C  | 2.76039400  | 1.91504500  | -0.05497500 |
| H  | 3.28979800  | 2.87636800  | -0.04390000 |
| H  | 3.07038200  | 1.35149100  | 0.82711000  |
| H  | 3.08605600  | 1.36869900  | -0.94103400 |
| Co | -0.33500300 | 0.69517700  | -0.10932100 |
| C  | 1.83172700  | -1.05496100 | -0.94119900 |
| O  | 1.91769600  | -1.03835900 | -2.17416600 |
| N  | 0.69637300  | -0.72937700 | -0.22765100 |
| C  | 2.99097700  | -1.43155600 | -0.07146100 |
| C  | 4.24496800  | -1.58375600 | -0.68311100 |
| C  | 2.86761700  | -1.58746700 | 1.31972300  |
| C  | 5.36411300  | -1.88120600 | 0.08946200  |
| H  | 4.31764700  | -1.46541400 | -1.75884200 |
| C  | 3.99214000  | -1.88361500 | 2.08815800  |
| H  | 1.89255200  | -1.49175200 | 1.78515800  |
| C  | 5.24013600  | -2.02783400 | 1.47520300  |
| H  | 6.33301700  | -2.00073400 | -0.38531200 |
| H  | 3.89603700  | -2.01152400 | 3.16204800  |
| H  | 6.11462600  | -2.26030200 | 2.07545900  |

<sup>5</sup>TS9, -2613.65892044, *i*194.27

|   |             |             |             |
|---|-------------|-------------|-------------|
| C | 3.16898500  | 3.73478100  | -1.03279600 |
| C | 3.92054800  | 3.27379800  | 0.02641400  |
| C | 3.66577000  | 1.98819800  | 0.57746200  |
| C | 2.63931300  | 1.18984400  | -0.00099300 |
| C | 1.91512000  | 1.64701700  | -1.13928700 |
| C | 2.16043400  | 2.92766800  | -1.61100600 |
| H | 5.14721500  | 2.03815600  | 2.15877000  |
| H | 3.35188400  | 4.72435900  | -1.43820800 |
| H | 4.69935200  | 3.89031100  | 0.46481500  |
| C | 4.35203800  | 1.45998600  | 1.69673100  |
| H | 1.59040300  | 3.30242500  | -2.45570500 |
| C | 2.93617800  | -0.47796600 | 1.59603000  |
| C | 3.99655500  | 0.22312600  | 2.19757800  |
| H | 2.60609800  | -1.43100800 | 1.98970500  |
| H | 4.50162200  | -0.20623400 | 3.05524200  |
| N | 2.27178200  | -0.01684400 | 0.53967000  |
| C | 0.96872300  | 0.72711300  | -1.77750500 |
| C | 0.82293000  | -2.89794000 | -0.16105200 |
| C | -0.00491000 | -2.56027300 | -1.31702600 |

|    |             |             |             |
|----|-------------|-------------|-------------|
| C  | -1.29193000 | -2.22693400 | -0.84304800 |
| C  | 0.05314900  | -2.68464700 | 1.01634300  |
| C  | -1.25179500 | -2.27695900 | 0.61427900  |
| H  | 1.42274700  | -0.17990800 | -2.20061500 |
| H  | 0.22065600  | 1.14811100  | -2.44047500 |
| C  | -2.48387300 | -1.88618000 | -1.67643700 |
| H  | -2.88091600 | -2.78287800 | -2.16772700 |
| H  | -3.28387600 | -1.45028700 | -1.07483400 |
| H  | -2.22838000 | -1.16375400 | -2.45825100 |
| C  | 0.39057100  | -2.74098200 | -2.75398700 |
| H  | 0.18700200  | -3.76532800 | -3.08868300 |
| H  | -0.16917600 | -2.06574300 | -3.40660100 |
| H  | 1.45843700  | -2.55954100 | -2.90927200 |
| C  | 2.21247300  | -3.44484500 | -0.26629900 |
| H  | 2.19407500  | -4.43824400 | -0.73042500 |
| H  | 2.84912000  | -2.81246700 | -0.89456200 |
| H  | 2.69314400  | -3.54346500 | 0.70827700  |
| C  | 0.46043900  | -2.94288300 | 2.44015000  |
| H  | -0.20545800 | -3.67836000 | 2.90369800  |
| H  | 1.47369800  | -3.34540800 | 2.50787800  |
| H  | 0.41216300  | -2.03571500 | 3.05259500  |
| C  | -2.40655000 | -1.99437100 | 1.51291300  |
| H  | -3.14837500 | -2.80079800 | 1.44522200  |
| H  | -2.09500600 | -1.91287200 | 2.55606900  |
| H  | -2.91273300 | -1.06595300 | 1.23403200  |
| Co | 0.43552000  | -0.62102000 | -0.26533000 |
| C  | -1.84866500 | 1.20022700  | -0.85862800 |
| O  | -1.88960100 | 1.38004400  | -2.07953600 |
| N  | -0.78177100 | 0.64258700  | -0.19302900 |
| C  | -3.00922800 | 1.51447300  | 0.03203300  |
| C  | -4.26637000 | 1.68833200  | -0.56731500 |
| C  | -2.87541000 | 1.62391600  | 1.42643700  |
| C  | -5.37976500 | 1.96119900  | 0.22273700  |
| H  | -4.34501500 | 1.61163400  | -1.64641600 |
| C  | -3.99291100 | 1.90436100  | 2.21102200  |
| H  | -1.89861400 | 1.50063800  | 1.88230900  |
| C  | -5.24465600 | 2.06831700  | 1.61122700  |
| H  | -6.35224100 | 2.09492600  | -0.24075000 |
| H  | -3.88871400 | 1.99988700  | 3.28740100  |
| H  | -6.11438400 | 2.28424400  | 2.22438300  |

<sup>10</sup>, -2613.76612287

|   |            |             |             |
|---|------------|-------------|-------------|
| C | 4.82220000 | -1.79752000 | 0.10123800  |
| C | 4.89209000 | -0.77534100 | -0.81481500 |

|    |             |             |             |
|----|-------------|-------------|-------------|
| C  | 3.72392100  | -0.04903700 | -1.15430100 |
| C  | 2.46915100  | -0.36260800 | -0.52132700 |
| C  | 2.40359400  | -1.47077200 | 0.37737700  |
| C  | 3.57904400  | -2.14349300 | 0.66933400  |
| H  | 4.70795400  | 1.20635100  | -2.61397700 |
| H  | 5.70972000  | -2.36228900 | 0.36671700  |
| H  | 5.82921800  | -0.51713700 | -1.29815200 |
| C  | 3.76425800  | 0.97961500  | -2.12618300 |
| H  | 3.53198200  | -2.99157100 | 1.34756200  |
| C  | 1.44468000  | 1.36559800  | -1.74627600 |
| C  | 2.61959900  | 1.66921100  | -2.45089200 |
| H  | 0.53484900  | 1.92788200  | -1.93042000 |
| H  | 2.60833500  | 2.44696700  | -3.20543500 |
| N  | 1.36543700  | 0.42246800  | -0.80987600 |
| C  | 1.12204800  | -1.99814700 | 1.00107000  |
| C  | -0.03741500 | 2.29338300  | 1.04514600  |
| C  | 0.14149100  | 1.19839600  | 1.98510400  |
| C  | -1.13761900 | 0.54190300  | 2.14533400  |
| C  | -1.34441300 | 2.21571500  | 0.53389700  |
| C  | -2.03378500 | 1.12863800  | 1.22580300  |
| H  | 1.13294400  | -1.77329500 | 2.07818200  |
| H  | 1.11190300  | -3.09111200 | 0.92344900  |
| C  | -1.45462200 | -0.59286800 | 3.06832900  |
| H  | -2.04792800 | -0.22929200 | 3.91467500  |
| H  | -2.02822100 | -1.37216000 | 2.56165900  |
| H  | -0.55180200 | -1.05548200 | 3.46799400  |
| C  | 1.38524400  | 0.97702700  | 2.78858200  |
| H  | 1.52725500  | 1.80409700  | 3.49391700  |
| H  | 1.33844500  | 0.05375300  | 3.36630700  |
| H  | 2.27039700  | 0.93245600  | 2.14837100  |
| C  | 1.01845900  | 3.30198200  | 0.71950300  |
| H  | 1.05153100  | 4.05941900  | 1.51133700  |
| H  | 2.00898800  | 2.84459300  | 0.66278500  |
| H  | 0.82222000  | 3.81885900  | -0.22157400 |
| C  | -1.98300000 | 3.11968600  | -0.47575800 |
| H  | -2.57629500 | 3.89039500  | 0.03012600  |
| H  | -1.24086400 | 3.63135100  | -1.09326700 |
| H  | -2.65558500 | 2.56460400  | -1.13298900 |
| C  | -3.48339900 | 0.80156300  | 1.07070000  |
| H  | -4.07910300 | 1.52236100  | 1.64413700  |
| H  | -3.80439900 | 0.85744200  | 0.03003100  |
| H  | -3.71366300 | -0.19661400 | 1.44313500  |
| Co | -0.30876200 | 0.35499000  | 0.19680300  |
| C  | -1.08760000 | -2.32658800 | 0.05602300  |

|   |             |             |             |
|---|-------------|-------------|-------------|
| O | -1.19100300 | -3.50448500 | 0.39783900  |
| N | -0.06436900 | -1.48747000 | 0.36992100  |
| C | -2.11610100 | -1.65380300 | -0.81259900 |
| C | -1.74716500 | -0.58255400 | -1.65068600 |
| C | -3.44313600 | -2.09346000 | -0.80336600 |
| C | -2.70852900 | 0.06897800  | -2.43832200 |
| H | -0.69083400 | -0.38603100 | -1.83884100 |
| C | -4.39522400 | -1.44661800 | -1.58942100 |
| H | -3.70157600 | -2.94223500 | -0.17847900 |
| C | -4.03374400 | -0.36001500 | -2.40158600 |
| H | -2.41077900 | 0.87046400  | -3.10807000 |
| H | -5.42639700 | -1.78644500 | -1.57643500 |
| H | -4.78132900 | 0.12562400  | -3.02091500 |

<sup>310</sup>, -2613.77086429

|   |             |             |             |
|---|-------------|-------------|-------------|
| C | -4.52082700 | -2.23113200 | -0.87263400 |
| C | -4.71529200 | -1.69024100 | 0.37441200  |
| C | -3.72261300 | -0.85512900 | 0.94892400  |
| C | -2.52481600 | -0.55680800 | 0.21465300  |
| C | -2.33148800 | -1.14387900 | -1.07440700 |
| C | -3.32593700 | -1.96327400 | -1.57712500 |
| H | -4.78374100 | -0.54580400 | 2.80670900  |
| H | -5.26972100 | -2.87921600 | -1.31548300 |
| H | -5.61606000 | -1.89967800 | 0.94299000  |
| C | -3.88025800 | -0.31826900 | 2.24824000  |
| H | -3.17387500 | -2.42930100 | -2.54634200 |
| C | -1.75732200 | 0.74513700  | 2.02228300  |
| C | -2.89329200 | 0.46950800  | 2.79644600  |
| H | -0.96252800 | 1.36472500  | 2.41811500  |
| H | -2.97390500 | 0.88085000  | 3.79579800  |
| N | -1.57692100 | 0.27904200  | 0.78627100  |
| C | -1.07184200 | -0.92228000 | -1.89803000 |
| C | 0.37072400  | 2.84212200  | 0.29005700  |
| C | 0.17061000  | 2.71933800  | -1.13543900 |
| C | 1.19318400  | 1.88765800  | -1.63166300 |
| C | 1.56557800  | 2.13404200  | 0.66658000  |
| C | 2.06923500  | 1.51727000  | -0.50422900 |
| H | -1.14641500 | 0.03456800  | -2.44039300 |
| H | -0.98350400 | -1.71135800 | -2.65011100 |
| C | 1.42654000  | 1.45309300  | -3.04338900 |
| H | 2.31965100  | 1.94418600  | -3.44643400 |
| H | 1.58838600  | 0.37292100  | -3.09457700 |
| H | 0.58548400  | 1.70570100  | -3.69136800 |
| C | -0.95631300 | 3.35164500  | -1.89739200 |

|    |             |             |             |
|----|-------------|-------------|-------------|
| H  | -0.77584200 | 4.42400900  | -2.03511800 |
| H  | -1.07457500 | 2.90710300  | -2.88745800 |
| H  | -1.90741500 | 3.24826900  | -1.36608900 |
| C  | -0.47387300 | 3.70323100  | 1.17599300  |
| H  | -0.28951500 | 4.75736300  | 0.93590800  |
| H  | -1.54209800 | 3.52301800  | 1.02332000  |
| H  | -0.24215900 | 3.56707600  | 2.23382700  |
| C  | 2.18139800  | 2.08106200  | 2.03392000  |
| H  | 2.88626000  | 2.90855100  | 2.17396100  |
| H  | 1.42889500  | 2.15911200  | 2.82375300  |
| H  | 2.72538100  | 1.14626300  | 2.18258800  |
| C  | 3.35271200  | 0.76809200  | -0.65088900 |
| H  | 4.14618300  | 1.46676500  | -0.94528200 |
| H  | 3.65278500  | 0.28216000  | 0.27809600  |
| H  | 3.28238500  | 0.00123400  | -1.42338700 |
| Co | 0.10020500  | 0.70288900  | -0.18837900 |
| C  | 0.90972600  | -2.05438900 | -1.03564500 |
| O  | 0.76840700  | -2.97417800 | -1.83764500 |
| N  | 0.13107100  | -0.91409200 | -1.07253000 |
| C  | 1.95290000  | -2.10388100 | 0.03750900  |
| C  | 1.73076000  | -1.59043900 | 1.32330400  |
| C  | 3.17524900  | -2.72350000 | -0.25462300 |
| C  | 2.73502100  | -1.65671300 | 2.29187800  |
| H  | 0.75787200  | -1.18177100 | 1.58287000  |
| C  | 4.18450200  | -2.77073700 | 0.70487600  |
| H  | 3.31662800  | -3.15557100 | -1.23995500 |
| C  | 3.96922700  | -2.23115600 | 1.97768700  |
| H  | 2.54958400  | -1.27879600 | 3.29316800  |
| H  | 5.13643300  | -3.23488000 | 0.46643800  |
| H  | 4.75263900  | -2.27895700 | 2.72787800  |

<sup>5</sup>10, -2613.74649119

|   |             |             |             |
|---|-------------|-------------|-------------|
| C | -4.81774400 | -1.87338500 | -0.69573400 |
| C | -4.93483900 | -1.15700100 | 0.46918600  |
| C | -3.84028100 | -0.38941400 | 0.94443800  |
| C | -2.61200600 | -0.34038100 | 0.19899400  |
| C | -2.50881400 | -1.10236100 | -1.01030700 |
| C | -3.60291800 | -1.84623900 | -1.41535500 |
| H | -4.85914100 | 0.28966100  | 2.72629800  |
| H | -5.64477300 | -2.47223100 | -1.06232700 |
| H | -5.85289100 | -1.17399500 | 1.04855300  |
| C | -3.93182700 | 0.32711600  | 2.16166100  |
| H | -3.51980800 | -2.43971100 | -2.32126200 |
| C | -1.68956800 | 1.06630200  | 1.83987300  |

|    |             |             |             |
|----|-------------|-------------|-------------|
| C  | -2.85472700 | 1.04867800  | 2.62190500  |
| H  | -0.81956900 | 1.62297100  | 2.16848800  |
| H  | -2.88551400 | 1.59573000  | 3.55704100  |
| N  | -1.56085000 | 0.42553500  | 0.68020900  |
| C  | -1.25932500 | -1.13370100 | -1.88179000 |
| C  | 0.59348600  | 2.90120200  | 0.07463000  |
| C  | 0.55399900  | 2.58313300  | -1.33998000 |
| C  | 1.63485200  | 1.68426000  | -1.63801000 |
| C  | 1.65931700  | 2.18839700  | 0.64782300  |
| C  | 2.33194900  | 1.44054100  | -0.42389000 |
| H  | -1.23918900 | -0.24088100 | -2.52553900 |
| H  | -1.29143700 | -2.00659000 | -2.54063700 |
| C  | 1.99521500  | 1.15112100  | -2.99430600 |
| H  | 2.66233300  | 1.84334400  | -3.52066600 |
| H  | 2.50391600  | 0.18777700  | -2.91936200 |
| H  | 1.11000900  | 1.00723700  | -3.61907800 |
| C  | -0.43834600 | 3.14051800  | -2.30691500 |
| H  | -0.16758200 | 4.16992000  | -2.57724800 |
| H  | -0.48012200 | 2.56154900  | -3.23176900 |
| H  | -1.44253300 | 3.18122500  | -1.87296500 |
| C  | -0.33310400 | 3.87891200  | 0.73016400  |
| H  | -0.18183200 | 4.88143900  | 0.31341200  |
| H  | -1.38435300 | 3.61934300  | 0.56473100  |
| H  | -0.16499800 | 3.94613400  | 1.80686600  |
| C  | 2.14161800  | 2.22881100  | 2.06613400  |
| H  | 3.05410600  | 2.83229100  | 2.14415800  |
| H  | 1.40132500  | 2.66767000  | 2.73907800  |
| H  | 2.38691900  | 1.22713100  | 2.43099900  |
| C  | 3.59975500  | 0.66488500  | -0.26294300 |
| H  | 4.46204300  | 1.33946900  | -0.34493600 |
| H  | 3.65462300  | 0.17250000  | 0.70935500  |
| H  | 3.70443900  | -0.10177600 | -1.03246800 |
| Co | 0.31541900  | 0.45892000  | -0.27719000 |
| C  | 0.64133200  | -2.35935500 | -0.93744400 |
| O  | 0.46513600  | -3.34548900 | -1.64250900 |
| N  | -0.04493400 | -1.16717100 | -1.07927900 |
| C  | 1.67032500  | -2.31909200 | 0.15640500  |
| C  | 1.39736000  | -1.69062800 | 1.38493700  |
| C  | 2.91190500  | -2.93162500 | -0.04523100 |
| C  | 2.37162800  | -1.65354700 | 2.38820800  |
| H  | 0.39585600  | -1.32095600 | 1.59563300  |
| C  | 3.88725500  | -2.87692700 | 0.95014900  |
| H  | 3.09531500  | -3.44570000 | -0.98327900 |
| C  | 3.62171700  | -2.23445600 | 2.16538900  |



|   |            |             |            |
|---|------------|-------------|------------|
| H | 2.14381800 | -1.20102700 | 3.34896100 |
| H | 4.85352300 | -3.34345300 | 0.78520200 |
| H | 4.37932700 | -2.20914100 | 2.94250900 |

<sup>11</sup>, -2960.99063131

|   |             |             |             |
|---|-------------|-------------|-------------|
| C | 0.06469400  | 4.92059500  | 0.86167800  |
| C | -1.11436900 | 4.60448100  | 1.49169400  |
| C | -1.65353400 | 3.29832100  | 1.37420200  |
| C | -0.98326700 | 2.31468100  | 0.56873400  |
| C | 0.25837400  | 2.65107500  | -0.05072600 |
| C | 0.74576400  | 3.93644000  | 0.11309000  |
| H | -3.34822900 | 3.66854500  | 2.66675200  |
| H | 0.48986900  | 5.91457500  | 0.95322400  |
| H | -1.64136400 | 5.33642100  | 2.09607100  |
| C | -2.83887500 | 2.92998100  | 2.05438000  |
| H | 1.69707600  | 4.19389300  | -0.34475400 |
| C | -2.63251700 | 0.74332100  | 1.12105800  |
| C | -3.32009400 | 1.64634100  | 1.94767100  |
| H | -2.98541800 | -0.27482900 | 1.00632200  |
| H | -4.21183500 | 1.32072300  | 2.47069200  |
| N | -1.53488300 | 1.05654600  | 0.43731700  |
| C | 1.06968900  | 1.67525800  | -0.87485500 |
| C | -1.42238400 | 0.16806400  | -2.66116500 |
| C | -2.60667600 | -0.32328100 | -1.99391900 |
| C | -2.36457400 | -1.65248000 | -1.59279900 |
| C | -0.49025600 | -0.92450700 | -2.76354000 |
| C | -1.03646400 | -2.02805600 | -2.05549100 |
| H | 2.11402700  | 1.99164400  | -0.84511000 |
| H | 0.76454700  | 1.76229800  | -1.92435200 |
| C | -3.26604100 | -2.56358900 | -0.82103100 |
| H | -3.56961200 | -3.41256700 | -1.44307400 |
| H | -2.74390000 | -2.96247700 | 0.05303500  |
| H | -4.17328800 | -2.05606900 | -0.48599700 |
| C | -3.85049500 | 0.48505000  | -1.79883800 |
| H | -4.41941900 | 0.50817900  | -2.73572000 |
| H | -4.50118400 | 0.06818500  | -1.02825400 |
| H | -3.61796400 | 1.51902000  | -1.53185100 |
| C | -1.34025000 | 1.50534900  | -3.33713500 |
| H | -2.09300900 | 1.57105900  | -4.13108500 |
| H | -1.53118900 | 2.32568900  | -2.63808100 |
| H | -0.36556300 | 1.66913600  | -3.79949600 |
| C | 0.81819400  | -0.88838200 | -3.48663500 |
| H | 0.65078100  | -1.07287400 | -4.55409900 |
| H | 1.30555900  | 0.08511900  | -3.39318700 |

|    |             |             |             |
|----|-------------|-------------|-------------|
| H  | 1.50022300  | -1.64575700 | -3.10299800 |
| C  | -0.44110100 | -3.38202600 | -1.84374400 |
| H  | -1.00479900 | -4.13026000 | -2.41348100 |
| H  | 0.60476200  | -3.41566000 | -2.14047200 |
| H  | -0.49037400 | -3.64985100 | -0.78550900 |
| Co | -0.85844400 | -0.39459200 | -0.73311100 |
| C  | 2.00649100  | -0.59040300 | -0.51910900 |
| O  | 1.82639100  | -1.80473300 | -0.63146700 |
| N  | 0.93190700  | 0.28571300  | -0.44096700 |
| C  | 3.40292600  | -0.06609200 | -0.34163200 |
| C  | 3.72804500  | 0.88355600  | 0.63928900  |
| C  | 4.42224600  | -0.63064800 | -1.11949600 |
| C  | 5.05390800  | 1.27411000  | 0.82469300  |
| H  | 2.94973100  | 1.29968700  | 1.27332600  |
| C  | 5.74362800  | -0.22257800 | -0.94765300 |
| H  | 4.16675300  | -1.39422100 | -1.84695900 |
| C  | 6.06135200  | 0.72996200  | 0.02432000  |
| H  | 5.30151400  | 1.99683800  | 1.59624600  |
| H  | 6.52710700  | -0.65470100 | -1.56254300 |
| H  | 7.09245500  | 1.03966500  | 0.16471200  |
| C  | -0.13778500 | -1.48040700 | 1.88088900  |
| C  | -0.14978700 | -2.53386400 | 2.97163400  |
| O  | -0.80559100 | -1.61337300 | 0.83376100  |
| O  | 0.62984200  | -0.44354500 | 2.09948200  |
| H  | 0.74099300  | 0.05177700  | 1.21704300  |
| C  | -1.20995900 | -3.60229700 | 2.67068000  |
| H  | -1.20305500 | -4.35564200 | 3.46295400  |
| H  | -2.21330300 | -3.16744300 | 2.62395500  |
| H  | -1.01018700 | -4.10399000 | 1.72031100  |
| C  | -0.43382600 | -1.85098600 | 4.32712900  |
| H  | -0.40618700 | -2.60214900 | 5.12145900  |
| H  | 0.31125300  | -1.08422100 | 4.54936800  |
| H  | -1.42572600 | -1.38599300 | 4.33749700  |
| C  | 1.26626700  | -3.16479900 | 2.97756000  |
| H  | 1.30360000  | -3.95248600 | 3.73565600  |
| H  | 1.50605100  | -3.60619000 | 2.00550300  |
| H  | 2.02702500  | -2.41684500 | 3.21262500  |

<sup>31</sup>I, -2960.97277801

|   |             |             |             |
|---|-------------|-------------|-------------|
| C | -2.08037500 | -4.30584000 | -1.83276200 |
| C | -3.19960000 | -3.51153400 | -1.91149600 |
| C | -3.09894200 | -2.12476700 | -1.63717500 |
| C | -1.83639100 | -1.55489800 | -1.25569100 |
| C | -0.66149900 | -2.37352000 | -1.29474800 |

|    |             |             |             |
|----|-------------|-------------|-------------|
| C  | -0.82435300 | -3.72563400 | -1.55112800 |
| H  | -5.17679600 | -1.67926300 | -2.04870100 |
| H  | -2.14639700 | -5.37211000 | -2.02280200 |
| H  | -4.16525000 | -3.92735200 | -2.18291500 |
| C  | -4.22283400 | -1.26510700 | -1.73434900 |
| H  | 0.05665500  | -4.36196000 | -1.57273800 |
| C  | -2.85398200 | 0.52628000  | -0.94909800 |
| C  | -4.09729700 | 0.07042200  | -1.43213800 |
| H  | -2.73326100 | 1.54646700  | -0.59948700 |
| H  | -4.93232700 | 0.75731400  | -1.51190200 |
| N  | -1.77971500 | -0.24255700 | -0.84410200 |
| C  | 0.77051500  | -1.85199900 | -1.28421100 |
| C  | -0.64208600 | -1.44779200 | 2.34373500  |
| C  | -1.88189600 | -0.82870300 | 2.21030200  |
| C  | -1.68419800 | 0.59214100  | 2.46523900  |
| C  | 0.34795900  | -0.42064300 | 2.76335100  |
| C  | -0.30986900 | 0.81610500  | 2.86005100  |
| H  | 1.03308200  | -1.72471700 | -2.34542700 |
| H  | 1.43202700  | -2.64089800 | -0.90396900 |
| C  | -2.73735700 | 1.64844600  | 2.42528700  |
| H  | -3.00858000 | 1.95124100  | 3.44452000  |
| H  | -2.36664500 | 2.53938400  | 1.90910600  |
| H  | -3.64398200 | 1.30219100  | 1.92590100  |
| C  | -3.18933800 | -1.47897800 | 1.88102400  |
| H  | -3.78166500 | -1.63558900 | 2.79033900  |
| H  | -3.79062200 | -0.86889300 | 1.20356800  |
| H  | -3.04440800 | -2.45277700 | 1.40915500  |
| C  | -0.31020400 | -2.89520400 | 2.18195800  |
| H  | -0.23124500 | -3.38189800 | 3.16251400  |
| H  | -1.06800800 | -3.42398000 | 1.60180000  |
| H  | 0.65340000  | -3.02414800 | 1.68107200  |
| C  | 1.75060100  | -0.73825000 | 3.15871800  |
| H  | 1.75377500  | -1.23394300 | 4.13826000  |
| H  | 2.22711600  | -1.41836900 | 2.44795600  |
| H  | 2.35787100  | 0.16375000  | 3.22323300  |
| C  | 0.28308000  | 2.13381400  | 3.26089200  |
| H  | 0.16626200  | 2.31294900  | 4.33581300  |
| H  | 1.34629300  | 2.16628500  | 3.01540900  |
| H  | -0.20046300 | 2.95439600  | 2.72579700  |
| Co | -0.26514700 | 0.29718000  | 0.69984900  |
| C  | 2.15125900  | -0.12064100 | -0.10642100 |
| O  | 2.03151400  | 0.87206700  | 0.66716900  |
| N  | 0.97489500  | -0.60507100 | -0.56951600 |
| C  | 3.49798000  | -0.66881500 | -0.41766000 |

|   |             |             |             |
|---|-------------|-------------|-------------|
| C | 3.82076200  | -1.26944900 | -1.64446200 |
| C | 4.49337400  | -0.53624400 | 0.56519100  |
| C | 5.11133100  | -1.74435800 | -1.87492700 |
| H | 3.08453900  | -1.33411500 | -2.43672100 |
| C | 5.77510400  | -1.03005500 | 0.33968000  |
| H | 4.24542200  | -0.03751800 | 1.49510600  |
| C | 6.08587000  | -1.63713000 | -0.88053500 |
| H | 5.35710100  | -2.19308500 | -2.83235700 |
| H | 6.53499500  | -0.93328500 | 1.10889900  |
| H | 7.08759500  | -2.01556600 | -1.05977200 |
| C | -0.05998700 | 2.62236700  | -1.05438700 |
| C | -0.10116400 | 4.07813200  | -1.48566300 |
| O | -0.53001100 | 2.23955400  | 0.03378200  |
| O | 0.50479700  | 1.80639200  | -1.91548600 |
| H | 0.58397800  | 0.88183600  | -1.53583600 |
| C | -0.85570200 | 4.91201400  | -0.44036500 |
| H | -0.87498000 | 5.95917100  | -0.75431200 |
| H | -1.88941100 | 4.57099200  | -0.32812300 |
| H | -0.37133800 | 4.85483800  | 0.53795200  |
| C | -0.80263000 | 4.16604900  | -2.85997100 |
| H | -0.82410100 | 5.20944700  | -3.18708200 |
| H | -0.27554600 | 3.57691400  | -3.61346900 |
| H | -1.83729900 | 3.81076200  | -2.80158400 |
| C | 1.36430700  | 4.56249800  | -1.60680900 |
| H | 1.37042800  | 5.61308800  | -1.91143200 |
| H | 1.88788600  | 4.48124100  | -0.64905100 |
| H | 1.91158800  | 3.98039600  | -2.35163800 |

<sup>511</sup>, -2960.95839783

|   |             |             |             |
|---|-------------|-------------|-------------|
| C | -2.47326200 | -3.61033100 | -2.49976300 |
| C | -3.54716200 | -2.76381100 | -2.36358900 |
| C | -3.35393000 | -1.46392700 | -1.83237500 |
| C | -2.04473400 | -1.04127900 | -1.42046900 |
| C | -0.91915100 | -1.88820600 | -1.68500200 |
| C | -1.17374100 | -3.15605100 | -2.18320100 |
| H | -5.42250400 | -0.85646800 | -2.01613400 |
| H | -2.60875400 | -4.61556100 | -2.88515800 |
| H | -4.54685500 | -3.07278000 | -2.65348800 |
| C | -4.43217600 | -0.55437000 | -1.68696200 |
| H | -0.33378100 | -3.81830300 | -2.37583100 |
| C | -2.93142700 | 0.98833400  | -0.65685600 |
| C | -4.22103900 | 0.68910500  | -1.13704400 |
| H | -2.73017100 | 1.92176500  | -0.13909300 |
| H | -5.02128600 | 1.41249500  | -1.03022000 |

|    |             |             |             |
|----|-------------|-------------|-------------|
| N  | -1.89979500 | 0.16082500  | -0.76337800 |
| C  | 0.54314700  | -1.44958200 | -1.67078800 |
| C  | -0.57264200 | -2.12318400 | 2.05310500  |
| C  | -1.78052900 | -1.41831200 | 2.01355700  |
| C  | -1.54114200 | -0.05482900 | 2.54047200  |
| C  | 0.40674400  | -1.28262100 | 2.65736400  |
| C  | -0.19631900 | 0.02617800  | 2.92650400  |
| H  | 0.74981300  | -1.10020900 | -2.69449600 |
| H  | 1.16924800  | -2.33701100 | -1.52234400 |
| C  | -2.61593600 | 0.95632200  | 2.81133000  |
| H  | -3.07454700 | 0.77076500  | 3.79085700  |
| H  | -2.21673500 | 1.97365100  | 2.82247600  |
| H  | -3.41579600 | 0.91023200  | 2.06823000  |
| C  | -3.11467700 | -1.92826400 | 1.58500300  |
| H  | -3.70407300 | -2.23498000 | 2.45967500  |
| H  | -3.69653300 | -1.16297400 | 1.06502600  |
| H  | -3.02740100 | -2.79636200 | 0.92822100  |
| C  | -0.32190600 | -3.52321500 | 1.57595000  |
| H  | -0.33952300 | -4.24270400 | 2.40331100  |
| H  | -1.06938300 | -3.83910200 | 0.84453500  |
| H  | 0.66078600  | -3.60595900 | 1.09980400  |
| C  | 1.79706400  | -1.68442200 | 3.00266500  |
| H  | 1.79287400  | -2.36020400 | 3.86885600  |
| H  | 2.26882500  | -2.23178700 | 2.17968000  |
| H  | 2.41895200  | -0.82192700 | 3.24134300  |
| C  | 0.48735700  | 1.14684600  | 3.65150900  |
| H  | 0.61031500  | 0.90236300  | 4.71349300  |
| H  | 1.47618300  | 1.33357700  | 3.22643100  |
| H  | -0.08849100 | 2.07248400  | 3.58667700  |
| Co | -0.29991800 | 0.39737400  | 0.65527700  |
| C  | 2.08132800  | -0.23481800 | -0.09962700 |
| O  | 2.03958800  | 0.51126500  | 0.91901500  |
| N  | 0.87989800  | -0.41094400 | -0.71045000 |
| C  | 3.36859000  | -0.82686000 | -0.54322800 |
| C  | 3.64031300  | -1.13145000 | -1.88693100 |
| C  | 4.36545800  | -1.03752000 | 0.42452300  |
| C  | 4.87871900  | -1.65831800 | -2.25011000 |
| H  | 2.90653500  | -0.92457600 | -2.65708000 |
| C  | 5.59433800  | -1.58056300 | 0.06118400  |
| H  | 4.16165400  | -0.76239200 | 1.45251800  |
| C  | 5.85169300  | -1.89517100 | -1.27644900 |
| H  | 5.08642700  | -1.87813700 | -3.29262400 |
| H  | 6.35537200  | -1.75004500 | 0.81646200  |
| H  | 6.81251300  | -2.31319400 | -1.56085300 |

|   |             |            |             |
|---|-------------|------------|-------------|
| C | 0.24571300  | 2.94530100 | -0.64629900 |
| C | 0.29572700  | 4.45026600 | -0.83786800 |
| O | -0.26041600 | 2.41706100 | 0.36329400  |
| O | 0.78005300  | 2.24281400 | -1.62141500 |
| H | 0.77571500  | 1.26338900 | -1.40327900 |
| C | -0.43314700 | 5.14925500 | 0.31861500  |
| H | -0.38497600 | 6.23226200 | 0.17645700  |
| H | -1.48671600 | 4.85725600 | 0.36053700  |
| H | 0.02407400  | 4.90679200 | 1.28124100  |
| C | -0.37018200 | 4.79648600 | -2.18936400 |
| H | -0.32724600 | 5.87836900 | -2.34321500 |
| H | 0.14015100  | 4.30721400 | -3.02176500 |
| H | -1.42368400 | 4.49669600 | -2.20148900 |
| C | 1.78843900  | 4.86163700 | -0.86341800 |
| H | 1.85782900  | 5.94471200 | -0.99937400 |
| H | 2.28603600  | 4.60425400 | 0.07697800  |
| H | 2.31924900  | 4.37325200 | -1.68381200 |

<sup>1</sup>TS12, -2960.98606902, i1073.46

|   |             |             |             |
|---|-------------|-------------|-------------|
| C | 0.00115600  | 4.94738800  | 0.31324000  |
| C | -1.18516600 | 4.68536300  | 0.95433400  |
| C | -1.69969100 | 3.36439800  | 0.98341000  |
| C | -0.99971000 | 2.30708800  | 0.30855700  |
| C | 0.25207100  | 2.58985300  | -0.31554300 |
| C | 0.71673800  | 3.89372500  | -0.29520400 |
| H | -3.41809600 | 3.84653400  | 2.20621600  |
| H | 0.40774200  | 5.95302500  | 0.29372600  |
| H | -1.73565300 | 5.47332000  | 1.45913300  |
| C | -2.88640200 | 3.05281200  | 1.68935500  |
| H | 1.67660900  | 4.11239700  | -0.75530700 |
| C | -2.62503800 | 0.77725300  | 1.01783500  |
| C | -3.33829900 | 1.75496200  | 1.73007500  |
| H | -2.95336700 | -0.25517300 | 1.01907900  |
| H | -4.22767300 | 1.47242800  | 2.28136600  |
| N | -1.52830200 | 1.03426900  | 0.31080200  |
| C | 1.10894700  | 1.54244700  | -0.99095900 |
| C | -1.37846700 | -0.12237700 | -2.69013500 |
| C | -2.56158400 | -0.54478600 | -1.97994800 |
| C | -2.32275400 | -1.83396800 | -1.45509500 |
| C | -0.45360000 | -1.22366800 | -2.69465800 |
| C | -1.00006200 | -2.25699200 | -1.88515900 |
| H | 2.14626400  | 1.88059800  | -0.95422000 |
| H | 0.84656700  | 1.48599100  | -2.05216100 |
| C | -3.22222600 | -2.66451400 | -0.59567400 |

|    |             |             |             |
|----|-------------|-------------|-------------|
| H  | -3.52059300 | -3.57468200 | -1.12695200 |
| H  | -2.69723200 | -2.96583800 | 0.31522200  |
| H  | -4.13226000 | -2.12923800 | -0.31594300 |
| C  | -3.80464700 | 0.27919300  | -1.86285400 |
| H  | -4.37091100 | 0.21378700  | -2.79939900 |
| H  | -4.45719300 | -0.06392700 | -1.05841200 |
| H  | -3.57242200 | 1.33360300  | -1.69348400 |
| C  | -1.28047000 | 1.15105600  | -3.47870300 |
| H  | -2.02279900 | 1.15502800  | -4.28497200 |
| H  | -1.47167400 | 2.03000400  | -2.85488300 |
| H  | -0.29891100 | 1.26761700  | -3.94166200 |
| C  | 0.83840700  | -1.25553700 | -3.44786700 |
| H  | 0.62992800  | -1.40810900 | -4.51317900 |
| H  | 1.38698800  | -0.31409000 | -3.35610000 |
| H  | 1.48654700  | -2.05678200 | -3.09836700 |
| C  | -0.41278700 | -3.58799600 | -1.54322000 |
| H  | -1.02578800 | -4.38855700 | -1.97300500 |
| H  | 0.60870500  | -3.68757100 | -1.90366300 |
| H  | -0.39527700 | -3.71571100 | -0.45753000 |
| Co | -0.82645700 | -0.51619100 | -0.70662800 |
| C  | 2.09281100  | -0.69072300 | -0.51387500 |
| O  | 1.91199000  | -1.88610300 | -0.67938200 |
| N  | 0.97819800  | 0.19833300  | -0.39976100 |
| C  | 3.46592500  | -0.14504800 | -0.29461900 |
| C  | 3.72993500  | 0.85169900  | 0.65936800  |
| C  | 4.52646000  | -0.72862900 | -1.00227400 |
| C  | 5.04081900  | 1.26634700  | 0.88756100  |
| H  | 2.91941300  | 1.27554500  | 1.24496800  |
| C  | 5.83242100  | -0.29446900 | -0.78741700 |
| H  | 4.31262100  | -1.52223800 | -1.71066900 |
| C  | 6.09067900  | 0.70278800  | 0.15724100  |
| H  | 5.24456900  | 2.02308900  | 1.63877700  |
| H  | 6.64938300  | -0.73928300 | -1.34686800 |
| H  | 7.11004600  | 1.03345500  | 0.33137800  |
| C  | -0.14252100 | -1.18991000 | 1.99712100  |
| C  | -0.28334900 | -2.00707200 | 3.27713900  |
| O  | -0.78322400 | -1.54481000 | 0.95886800  |
| O  | 0.62585200  | -0.16748800 | 2.02657800  |
| H  | 0.81777900  | 0.16901600  | 0.87473400  |
| C  | -1.28837100 | -3.15240200 | 3.09371200  |
| H  | -1.36574000 | -3.72577900 | 4.02193600  |
| H  | -2.28431100 | -2.77293500 | 2.84508800  |
| H  | -0.97563000 | -3.83205800 | 2.29645400  |
| C  | -0.75390600 | -1.04982400 | 4.39466200  |

|   |             |             |            |
|---|-------------|-------------|------------|
| H | -0.83739800 | -1.59952600 | 5.33678400 |
| H | -0.04676900 | -0.22854900 | 4.52984700 |
| H | -1.73789400 | -0.62532300 | 4.16424800 |
| C | 1.11736300  | -2.56720600 | 3.61587200 |
| H | 1.06748900  | -3.13808100 | 4.54791600 |
| H | 1.47617100  | -3.23530900 | 2.82610400 |
| H | 1.84081300  | -1.75804200 | 3.73930700 |

<sup>3</sup>TS12, -2960.9724695, i1120.84

|   |             |             |             |
|---|-------------|-------------|-------------|
| C | 0.16195900  | 4.54094300  | 2.03953100  |
| C | 1.50743500  | 4.35624300  | 1.83823800  |
| C | 2.00550100  | 3.07700000  | 1.47615100  |
| C | 1.10433900  | 1.96960800  | 1.33470200  |
| C | -0.29344500 | 2.18572300  | 1.54799700  |
| C | -0.72830700 | 3.45305900  | 1.88524600  |
| H | 4.07689200  | 3.69007200  | 1.33592600  |
| H | -0.22647800 | 5.51733200  | 2.30960100  |
| H | 2.20697700  | 5.18003000  | 1.94448600  |
| C | 3.38324800  | 2.86022400  | 1.23382500  |
| H | -1.79099700 | 3.62001000  | 2.03881800  |
| C | 2.87262600  | 0.57982000  | 0.74073800  |
| C | 3.82260000  | 1.61072500  | 0.86276800  |
| H | 3.18460900  | -0.40679900 | 0.41822800  |
| H | 4.86779200  | 1.40793800  | 0.65805100  |
| N | 1.57489100  | 0.72797300  | 0.97311400  |
| C | -1.29689800 | 1.06390000  | 1.42843000  |
| C | 0.13050700  | -2.36415300 | 2.12329500  |
| C | 1.52847600  | -2.37841300 | 1.85290300  |
| C | 1.69126000  | -2.89868300 | 0.54317900  |
| C | -0.58398000 | -2.97359200 | 0.99228100  |
| C | 0.36746700  | -3.28651300 | 0.01793300  |
| H | -2.30689600 | 1.46804300  | 1.51386000  |
| H | -1.16761700 | 0.36975600  | 2.26615000  |
| C | 2.95362600  | -3.08851700 | -0.22876200 |
| H | 3.06563800  | -4.13833000 | -0.52226100 |
| H | 2.91622000  | -2.49705300 | -1.15137700 |
| H | 3.83712300  | -2.79906500 | 0.34302300  |
| C | 2.58755300  | -1.92755700 | 2.81303300  |
| H | 2.62469000  | -2.59330500 | 3.68263400  |
| H | 3.57912900  | -1.92872600 | 2.35708000  |
| H | 2.39059200  | -0.91573900 | 3.17995600  |
| C | -0.49074000 | -1.94725400 | 3.41376900  |
| H | -0.41935400 | -2.76857000 | 4.13975900  |
| H | 0.02737100  | -1.08882900 | 3.85085900  |



|    |             |             |             |
|----|-------------|-------------|-------------|
| H  | -1.55008700 | -1.70670400 | 3.30279700  |
| C  | -2.04986900 | -3.27404400 | 0.98542700  |
| H  | -2.25953400 | -4.13892600 | 1.62620200  |
| H  | -2.63719100 | -2.43388500 | 1.36739900  |
| H  | -2.40323100 | -3.49240400 | -0.02173100 |
| C  | 0.15421500  | -3.89437200 | -1.33191100 |
| H  | 0.51031200  | -4.93105600 | -1.35519300 |
| H  | -0.90002400 | -3.87969700 | -1.60896200 |
| H  | 0.70523600  | -3.33112700 | -2.09079200 |
| Co | 0.35120500  | -1.07879100 | 0.18732800  |
| C  | -2.18385700 | -0.29023700 | -0.52713500 |
| O  | -1.89042500 | -1.26442900 | -1.22671700 |
| N  | -1.12298000 | 0.30919200  | 0.17093600  |
| C  | -3.56060600 | 0.26188400  | -0.49028600 |
| C  | -3.79797800 | 1.64627900  | -0.48749500 |
| C  | -4.64047800 | -0.63141400 | -0.54458600 |
| C  | -5.10550200 | 2.12682500  | -0.52214200 |
| H  | -2.96268500 | 2.34074700  | -0.49945800 |
| C  | -5.94602400 | -0.14633300 | -0.55424000 |
| H  | -4.44153600 | -1.69728900 | -0.58284700 |
| C  | -6.17906400 | 1.23192600  | -0.54223100 |
| H  | -5.28816200 | 3.19667400  | -0.54032500 |
| H  | -6.78102800 | -0.83923000 | -0.58304000 |
| H  | -7.19699800 | 1.60899400  | -0.56000100 |
| C  | 1.03741500  | 0.43103900  | -2.11189100 |
| C  | 1.86353100  | 0.77532400  | -3.34922400 |
| O  | 1.24405100  | -0.68083600 | -1.52074200 |
| O  | 0.19098100  | 1.29535000  | -1.71238400 |
| H  | -0.47333500 | 0.89735200  | -0.74450800 |
| C  | 2.83401800  | -0.36134900 | -3.69851500 |
| H  | 3.41141900  | -0.09148500 | -4.58753400 |
| H  | 3.53585200  | -0.55042000 | -2.88061900 |
| H  | 2.29824400  | -1.29139600 | -3.90712200 |
| C  | 2.64615900  | 2.06902900  | -3.02444200 |
| H  | 3.24363000  | 2.36276500  | -3.89262800 |
| H  | 1.96403000  | 2.88513100  | -2.77568600 |
| H  | 3.32712200  | 1.91832700  | -2.17922400 |
| C  | 0.88556100  | 1.03029700  | -4.51710300 |
| H  | 1.44840300  | 1.32060800  | -5.40936400 |
| H  | 0.31280700  | 0.12823500  | -4.75621600 |
| H  | 0.18380000  | 1.83005300  | -4.27029300 |

<sup>5</sup>TS12, -2960.9595131, i1073.81

|   |             |            |            |
|---|-------------|------------|------------|
| C | -0.77123100 | 4.56652500 | 2.02306500 |
|---|-------------|------------|------------|

|    |             |             |             |
|----|-------------|-------------|-------------|
| C  | 0.57619100  | 4.62076100  | 1.76894800  |
| C  | 1.27581400  | 3.44778000  | 1.38246300  |
| C  | 0.58172400  | 2.19585200  | 1.27431300  |
| C  | -0.82413300 | 2.16177200  | 1.54225200  |
| C  | -1.45800300 | 3.33791500  | 1.89922900  |
| H  | 3.18918200  | 4.43207300  | 1.16179900  |
| H  | -1.31624400 | 5.45919300  | 2.31116400  |
| H  | 1.12441200  | 5.55458000  | 1.84903500  |
| C  | 2.65792800  | 3.48790600  | 1.08137500  |
| H  | -2.52643500 | 3.31656400  | 2.09457800  |
| C  | 2.56213400  | 1.15584800  | 0.58725800  |
| C  | 3.30563000  | 2.34381400  | 0.67689600  |
| H  | 3.03201300  | 0.24469400  | 0.23765700  |
| H  | 4.35870200  | 2.33936100  | 0.42024000  |
| N  | 1.26834300  | 1.06162700  | 0.88821900  |
| C  | -1.64299300 | 0.89247900  | 1.47777900  |
| C  | 1.80010100  | -2.05560100 | 2.12367100  |
| C  | 3.00238600  | -2.09239200 | 1.32274000  |
| C  | 2.68050800  | -2.64463500 | 0.09349300  |
| C  | 0.69784200  | -2.59970400 | 1.35200300  |
| C  | 1.25844300  | -3.02142300 | 0.11366000  |
| H  | -2.69696800 | 1.13775600  | 1.62402200  |
| H  | -1.36221100 | 0.23356000  | 2.31402800  |
| C  | 3.53555100  | -2.80146100 | -1.12005900 |
| H  | 3.54127700  | -3.83939800 | -1.47229900 |
| H  | 3.13637800  | -2.18805800 | -1.93779200 |
| H  | 4.57001000  | -2.50402700 | -0.93770900 |
| C  | 4.33081800  | -1.58847500 | 1.80039500  |
| H  | 4.73088600  | -2.23062400 | 2.59413000  |
| H  | 5.07053000  | -1.56072200 | 0.99738500  |
| H  | 4.25206400  | -0.57981000 | 2.22312400  |
| C  | 1.72673400  | -1.52490600 | 3.51248300  |
| H  | 0.71212200  | -1.55130400 | 3.91406000  |
| H  | 2.37388100  | -2.10449600 | 4.18326100  |
| H  | 2.08981000  | -0.48980900 | 3.55229200  |
| C  | -0.61340900 | -3.05455600 | 1.94879000  |
| H  | -0.46554000 | -3.92672100 | 2.59594300  |
| H  | -1.07568700 | -2.27120100 | 2.55857600  |
| H  | -1.32494100 | -3.32100700 | 1.16780100  |
| C  | 0.60561700  | -3.78260700 | -0.98819900 |
| H  | 1.11167600  | -4.74694100 | -1.12332800 |
| H  | -0.45276400 | -3.95507900 | -0.80374900 |
| H  | 0.69957500  | -3.23307100 | -1.93172000 |
| Co | 0.37506900  | -0.74273700 | 0.19569100  |

|   |             |             |             |
|---|-------------|-------------|-------------|
| C | -2.31080100 | -0.84667200 | -0.22233300 |
| O | -1.78736900 | -1.84179500 | -0.73460100 |
| N | -1.42413200 | 0.15586100  | 0.21688100  |
| C | -3.77686800 | -0.68111000 | -0.12933100 |
| C | -4.37833400 | 0.58479000  | -0.23208700 |
| C | -4.57723700 | -1.82742900 | -0.00582900 |
| C | -5.76605000 | 0.69912100  | -0.19837100 |
| H | -3.76223600 | 1.46699600  | -0.37991100 |
| C | -5.96291400 | -1.70571700 | 0.04879000  |
| H | -4.09926900 | -2.80020700 | 0.04308600  |
| C | -6.55717500 | -0.44353500 | -0.04636000 |
| H | -6.23179200 | 1.67452500  | -0.29722400 |
| H | -6.58101100 | -2.59136100 | 0.15632600  |
| H | -7.63838900 | -0.35100000 | -0.01168200 |
| C | 0.48260100  | 0.58337400  | -2.28357200 |
| C | 1.13540800  | 1.07251600  | -3.57549300 |
| O | 0.98847300  | -0.41437200 | -1.67276100 |
| O | -0.52734900 | 1.24051700  | -1.85594100 |
| H | -1.03966900 | 0.78599500  | -0.79737500 |
| C | 2.25595300  | 0.12061800  | -4.01733000 |
| H | 2.70794000  | 0.48779100  | -4.94350000 |
| H | 3.03959000  | 0.04942900  | -3.25766500 |
| H | 1.87085500  | -0.88660500 | -4.20011100 |
| C | 1.71425500  | 2.47513700  | -3.27141900 |
| H | 2.19494100  | 2.87689300  | -4.16850600 |
| H | 0.92445800  | 3.16300500  | -2.95992300 |
| H | 2.46779000  | 2.42841700  | -2.47645900 |
| C | 0.05156600  | 1.17819900  | -4.66846400 |
| H | 0.49327800  | 1.57419100  | -5.58791600 |
| H | -0.37632200 | 0.19606900  | -4.89509400 |
| H | -0.75661600 | 1.84191300  | -4.35401300 |

**MECP2, -2960.97605872**

|   |             |            |             |
|---|-------------|------------|-------------|
| C | -0.19301100 | 5.03430800 | 0.48222500  |
| C | -1.30580500 | 4.68946300 | 1.20931000  |
| C | -1.72831100 | 3.33820800 | 1.26250700  |
| C | -1.02094500 | 2.33252100 | 0.52323800  |
| C | 0.15881600  | 2.70483100 | -0.19245300 |
| C | 0.54088900  | 4.03488800 | -0.19045200 |
| H | -3.37336400 | 3.69353600 | 2.61989700  |
| H | 0.14395500  | 6.06423500 | 0.44277500  |
| H | -1.86563200 | 5.43537200 | 1.76408900  |
| C | -2.83405800 | 2.94116300 | 2.05286500  |
| H | 1.44711500  | 4.31745500 | -0.71807000 |

|    |             |             |             |
|----|-------------|-------------|-------------|
| C  | -2.47731400 | 0.69713400  | 1.32435300  |
| C  | -3.19568900 | 1.61667200  | 2.10802800  |
| H  | -2.74024300 | -0.35515900 | 1.33342800  |
| H  | -4.01999400 | 1.27417600  | 2.72232600  |
| N  | -1.45967500 | 1.03174100  | 0.54490200  |
| C  | 1.04441700  | 1.73850600  | -0.94819100 |
| C  | -1.63778600 | 0.08877400  | -2.55245900 |
| C  | -2.71527100 | -0.42629400 | -1.79207300 |
| C  | -2.39193200 | -1.77672500 | -1.46813900 |
| C  | -0.69640400 | -0.99894700 | -2.82398000 |
| C  | -1.16986000 | -2.14438500 | -2.16590200 |
| H  | 2.06671200  | 2.12409600  | -0.92430100 |
| H  | 0.75215900  | 1.69747800  | -2.00081800 |
| C  | -3.17764000 | -2.72172000 | -0.62335700 |
| H  | -3.49869400 | -3.58456400 | -1.21660400 |
| H  | -2.55987200 | -3.09594800 | 0.19902000  |
| H  | -4.06861900 | -2.25229800 | -0.20320200 |
| C  | -3.95190900 | 0.32972400  | -1.42427100 |
| H  | -4.65495400 | 0.33140700  | -2.26638200 |
| H  | -4.46734900 | -0.11392900 | -0.57090300 |
| H  | -3.73293700 | 1.37224800  | -1.17913900 |
| C  | -1.59671200 | 1.45986900  | -3.15051300 |
| H  | -2.39967100 | 1.56794400  | -3.88886400 |
| H  | -1.74652200 | 2.23907300  | -2.39669600 |
| H  | -0.65626700 | 1.65485900  | -3.66857800 |
| C  | 0.47495000  | -0.88978000 | -3.74580400 |
| H  | 0.12614300  | -0.85362200 | -4.78454100 |
| H  | 1.05564500  | 0.02075200  | -3.57057900 |
| H  | 1.15139300  | -1.73693200 | -3.63823200 |
| C  | -0.54224500 | -3.49877800 | -2.09270900 |
| H  | -1.17514500 | -4.24295100 | -2.58860600 |
| H  | 0.44009000  | -3.50962200 | -2.56314400 |
| H  | -0.41640400 | -3.80769400 | -1.05066300 |
| Co | -0.73787200 | -0.59774400 | -0.67633400 |
| C  | 2.14223300  | -0.50245200 | -0.73971000 |
| O  | 1.90966100  | -1.60377300 | -1.19729300 |
| N  | 1.00673100  | 0.36145800  | -0.41144700 |
| C  | 3.49988600  | -0.01422900 | -0.43052800 |
| C  | 3.73792400  | 0.92810600  | 0.58466700  |
| C  | 4.57905500  | -0.57378300 | -1.13302400 |
| C  | 5.04279400  | 1.31065300  | 0.88115200  |
| H  | 2.91537200  | 1.32693200  | 1.16870900  |
| C  | 5.87892200  | -0.17226100 | -0.84540800 |
| H  | 4.37845900  | -1.31695600 | -1.89707500 |

|   |             |             |             |
|---|-------------|-------------|-------------|
| C | 6.11086100  | 0.76995800  | 0.16084000  |
| H | 5.22893400  | 2.02423900  | 1.67713500  |
| H | 6.71126900  | -0.59570500 | -1.39710100 |
| H | 7.12641700  | 1.07661100  | 0.39021700  |
| C | 0.03211200  | -1.40145100 | 1.94382000  |
| C | -0.05448100 | -2.40605100 | 3.09863700  |
| O | -0.63357100 | -1.70057600 | 0.86274500  |
| O | 0.73009100  | -0.37881600 | 2.07854500  |
| H | 0.95428400  | 0.33157600  | 0.65080600  |
| C | -1.10387100 | -3.49395900 | 2.84592200  |
| H | -1.13530600 | -4.17942400 | 3.69825000  |
| H | -2.10372200 | -3.06605700 | 2.72418200  |
| H | -0.87109300 | -4.07572700 | 1.95080300  |
| C | -0.39588000 | -1.62169200 | 4.38046400  |
| H | -0.40578600 | -2.29960200 | 5.23892900  |
| H | 0.33931100  | -0.83527600 | 4.56010700  |
| H | -1.38571200 | -1.15697700 | 4.30837200  |
| C | 1.34710900  | -3.04107900 | 3.23357800  |
| H | 1.35780200  | -3.73798500 | 4.07695700  |
| H | 1.61643300  | -3.59814700 | 2.33034100  |
| H | 2.10444300  | -2.27255200 | 3.40620600  |

TsN<sub>3</sub>, -984.055669914

|   |             |             |             |
|---|-------------|-------------|-------------|
| N | -2.15744800 | -0.15369000 | -1.08033500 |
| N | -2.40438200 | -1.34450900 | -0.81604200 |
| N | -2.66143600 | -2.44112000 | -0.66091600 |
| C | 0.24434200  | 0.36885300  | 0.18390400  |
| C | 1.03251000  | 1.13472400  | -0.67729700 |
| C | 0.77896900  | -0.68594200 | 0.92510300  |
| C | 2.38490500  | 0.82896800  | -0.79193300 |
| H | 0.59036300  | 1.95352100  | -1.23392700 |
| C | 2.13529300  | -0.97357600 | 0.79352000  |
| H | 0.14565700  | -1.25404000 | 1.59734100  |
| C | 2.95601000  | -0.22519100 | -0.06225700 |
| H | 3.00951200  | 1.41847200  | -1.45705900 |
| H | 2.56401400  | -1.79009700 | 1.36745300  |
| S | -1.49677500 | 0.72806500  | 0.31394800  |
| O | -2.01978200 | 0.10780400  | 1.53149800  |
| O | -1.73419300 | 2.12173200  | -0.03205200 |
| C | 4.43059000  | -0.52342600 | -0.17217900 |
| H | 4.81001100  | -0.30225900 | -1.17384900 |
| H | 5.00144500  | 0.08924300  | 0.53611200  |
| H | 4.64635200  | -1.57140600 | 0.05306200  |

<sup>1</sup>TS7', -3197.86954212, i618.78

|   |             |             |             |
|---|-------------|-------------|-------------|
| C | 4.22183500  | -2.88105500 | 0.93975200  |
| C | 3.27935700  | -3.70493100 | 0.36188900  |
| C | 2.01998400  | -3.17645700 | -0.02747800 |
| C | 1.77740400  | -1.79607700 | 0.20881200  |
| C | 2.71965200  | -0.96757200 | 0.86172900  |
| C | 3.94557300  | -1.51289500 | 1.19482700  |
| H | 1.13584500  | -4.97765700 | -0.85396200 |
| H | 5.18928300  | -3.28441000 | 1.22147900  |
| H | 3.49152700  | -4.75465800 | 0.18432300  |
| C | 0.99554500  | -3.91679700 | -0.66746500 |
| H | 4.69467900  | -0.89826600 | 1.68547200  |
| C | -0.29876100 | -1.89216900 | -0.83426400 |
| C | -0.16281900 | -3.27787900 | -1.05630200 |
| H | -1.18185200 | -1.36186900 | -1.16098800 |
| H | -0.96734900 | -3.81259600 | -1.54840600 |
| N | 0.63513800  | -1.17496000 | -0.22734400 |
| C | 2.22812400  | 0.40403900  | 1.17751700  |
| C | 1.43658500  | 0.79607000  | -2.16645900 |
| C | 2.24942500  | 1.67878600  | -1.40666400 |
| C | 1.38986900  | 2.68616400  | -0.84264300 |
| C | 0.07273500  | 1.28701700  | -2.13503900 |
| C | 0.06051600  | 2.46427200  | -1.34532200 |
| H | 3.01689600  | 1.15739300  | 1.20938000  |
| H | 1.71501300  | 0.38418300  | 2.14410600  |
| C | 1.84596900  | 3.86628500  | -0.04220800 |
| H | 2.40462100  | 4.56223800  | -0.67855900 |
| H | 1.00571800  | 4.41855400  | 0.38171300  |
| H | 2.50992600  | 3.57077300  | 0.77580900  |
| C | 3.74166200  | 1.61543400  | -1.29993900 |
| H | 4.19474600  | 1.91841400  | -2.25052100 |
| H | 4.11911100  | 2.28599300  | -0.52591100 |
| H | 4.08790500  | 0.60293600  | -1.07455300 |
| C | 1.94177400  | -0.38018200 | -2.94347100 |
| H | 2.27455500  | -0.05878900 | -3.93706400 |
| H | 2.79227900  | -0.84773100 | -2.44207400 |
| H | 1.17205000  | -1.14168400 | -3.08088300 |
| C | -1.09462500 | 0.72354900  | -2.89033600 |
| H | -1.30751800 | 1.33804100  | -3.77271800 |
| H | -0.89367100 | -0.28887300 | -3.24492100 |
| H | -2.00075600 | 0.69888300  | -2.27774500 |
| C | -1.12728200 | 3.32568600  | -1.05160500 |
| H | -1.01548700 | 4.30166500  | -1.53640900 |

|    |             |             |             |
|----|-------------|-------------|-------------|
| H  | -2.04955900 | 2.87075500  | -1.41573600 |
| H  | -1.23775600 | 3.49757400  | 0.02224400  |
| Co | 0.77029700  | 0.78824200  | -0.13285000 |
| N  | -0.51481500 | 1.17305200  | 1.11755900  |
| N  | 0.04859500  | 2.17032700  | 2.31473900  |
| N  | 0.36925500  | 3.19464800  | 2.61927600  |
| C  | -2.67785900 | -0.35122500 | 0.98037900  |
| C  | -3.00589600 | -1.68998000 | 0.75399200  |
| C  | -3.39000300 | 0.68821200  | 0.37214400  |
| C  | -4.04961700 | -1.98594100 | -0.11982900 |
| H  | -2.44255100 | -2.47491500 | 1.24628600  |
| C  | -4.41869700 | 0.36888900  | -0.50965200 |
| H  | -3.13840000 | 1.72060500  | 0.58358600  |
| C  | -4.76701400 | -0.96813200 | -0.76822000 |
| H  | -4.31635100 | -3.02383400 | -0.29745900 |
| H  | -4.97311700 | 1.16799100  | -0.99358700 |
| S  | -1.38655600 | 0.01466500  | 2.15378500  |
| O  | -1.91128000 | 0.80684800  | 3.26930400  |
| O  | -0.60208400 | -1.19595400 | 2.40789400  |
| C  | -5.91411100 | -1.29785100 | -1.68827800 |
| H  | -5.79702300 | -2.28560200 | -2.14178700 |
| H  | -6.85758300 | -1.30389100 | -1.12938300 |
| H  | -6.01454100 | -0.55855100 | -2.48773000 |

<sup>3</sup>TS7', -3197.86574562, i540.55

|   |             |             |             |
|---|-------------|-------------|-------------|
| C | -2.78230100 | 4.08638000  | 1.04446300  |
| C | -1.66828900 | 4.47321500  | 0.32996600  |
| C | -0.73424600 | 3.49846100  | -0.11257300 |
| C | -0.98684000 | 2.14074500  | 0.21545800  |
| C | -2.09056500 | 1.75379500  | 1.01278400  |
| C | -2.99888400 | 2.72764000  | 1.38926600  |
| H | 0.65309700  | 4.80322700  | -1.15306000 |
| H | -3.50193100 | 4.83208300  | 1.36654100  |
| H | -1.50163800 | 5.51698400  | 0.08258800  |
| C | 0.41642500  | 3.77547000  | -0.89321900 |
| H | -3.86210100 | 2.45798100  | 1.99036200  |
| C | 0.86351200  | 1.41058400  | -0.99901500 |
| C | 1.21798000  | 2.73790200  | -1.31886500 |
| H | 1.46133800  | 0.57501200  | -1.33944200 |
| H | 2.11275000  | 2.91298900  | -1.90446800 |
| N | -0.20698200 | 1.12554700  | -0.27231300 |
| C | -2.10729600 | 0.33358500  | 1.43416700  |
| C | -2.07629500 | -0.36792000 | -1.87560300 |
| C | -2.99191300 | -0.92071400 | -0.92908200 |

|    |             |             |             |
|----|-------------|-------------|-------------|
| C  | -2.47911600 | -2.20231500 | -0.51548100 |
| C  | -1.01470900 | -1.31772600 | -2.07917500 |
| C  | -1.28278400 | -2.46090900 | -1.27501200 |
| H  | -3.09078200 | -0.08405400 | 1.63699800  |
| H  | -1.42774800 | 0.15651400  | 2.26541400  |
| C  | -3.22084100 | -3.14340700 | 0.38304200  |
| H  | -4.17939500 | -3.40909000 | -0.07786700 |
| H  | -2.66287500 | -4.05786400 | 0.57264700  |
| H  | -3.43827900 | -2.68105400 | 1.35025700  |
| C  | -4.33496100 | -0.35476600 | -0.59314600 |
| H  | -5.01493800 | -0.50599600 | -1.43976200 |
| H  | -4.77651400 | -0.84577900 | 0.27566400  |
| H  | -4.28666400 | 0.72015600  | -0.39837600 |
| C  | -2.26037700 | 0.92875700  | -2.59732900 |
| H  | -2.83209000 | 0.76040800  | -3.51770400 |
| H  | -2.81258400 | 1.64779300  | -1.98929600 |
| H  | -1.30629900 | 1.37966300  | -2.87672100 |
| C  | 0.13148900  | -1.19673600 | -3.03591000 |
| H  | -0.04183400 | -1.83007300 | -3.91405200 |
| H  | 0.26023400  | -0.17294600 | -3.39056000 |
| H  | 1.06960600  | -1.52620500 | -2.57803100 |
| C  | -0.47575300 | -3.71992200 | -1.33723200 |
| H  | -0.52683300 | -4.12398400 | -2.35499700 |
| H  | 0.57894700  | -3.53216900 | -1.11606300 |
| H  | -0.83740300 | -4.48276600 | -0.65006100 |
| Co | -1.01731500 | -0.66446500 | 0.00892500  |
| N  | 0.27727600  | -1.33306300 | 1.18794300  |
| N  | 0.42077500  | -2.84864700 | 1.66247500  |
| N  | -0.42352300 | -3.62073500 | 1.68629200  |
| C  | 2.78153300  | -0.21372900 | 0.90967700  |
| C  | 3.41462400  | 1.02818000  | 0.86157000  |
| C  | 3.16565300  | -1.25526200 | 0.06120800  |
| C  | 4.43723700  | 1.22927500  | -0.06535800 |
| H  | 3.09104900  | 1.82544700  | 1.52153500  |
| C  | 4.18110700  | -1.03194800 | -0.86531500 |
| H  | 2.67427400  | -2.22070700 | 0.12015300  |
| C  | 4.83408200  | 0.21048300  | -0.94342100 |
| H  | 4.93431800  | 2.19442800  | -0.10707600 |
| H  | 4.48280100  | -1.83581500 | -1.53127600 |
| S  | 1.45750600  | -0.45136900 | 2.09173100  |
| O  | 1.92069200  | -1.29591800 | 3.18919300  |
| O  | 0.86378300  | 0.86480300  | 2.36361200  |
| C  | 5.95994500  | 0.42535300  | -1.92348000 |
| H  | 6.08069800  | 1.48240800  | -2.17521300 |



|   |            |             |             |
|---|------------|-------------|-------------|
| H | 6.90851100 | 0.08085900  | -1.49478500 |
| H | 5.80060100 | -0.13462100 | -2.84954300 |

<sup>5</sup>TS7', -3197.84101497, i513.10

|   |             |             |             |
|---|-------------|-------------|-------------|
| C | 2.92985900  | 3.97840000  | -1.16677300 |
| C | 1.81658000  | 4.44413200  | -0.50022800 |
| C | 0.80846100  | 3.53724000  | -0.07334000 |
| C | 0.96238600  | 2.15638700  | -0.37360700 |
| C | 2.07093900  | 1.69403800  | -1.14680000 |
| C | 3.06359900  | 2.60569500  | -1.48375200 |
| H | -0.48743700 | 4.96775400  | 0.91641700  |
| H | 3.70792900  | 4.66989500  | -1.47298800 |
| H | 1.70693100  | 5.50039700  | -0.27411300 |
| C | -0.32758900 | 3.91873800  | 0.68398700  |
| H | 3.92621600  | 2.26950100  | -2.05128300 |
| C | -0.93555800 | 1.59848100  | 0.84882300  |
| C | -1.20589900 | 2.95389000  | 1.12873900  |
| H | -1.58373800 | 0.81579500  | 1.22451700  |
| H | -2.08781600 | 3.20914200  | 1.70471300  |
| N | 0.11383100  | 1.21214700  | 0.13694900  |
| C | 2.06407400  | 0.29856300  | -1.60386900 |
| C | 2.12739300  | -0.15807200 | 1.83236700  |
| C | 2.99794900  | -0.83535700 | 0.92587800  |
| C | 2.52099200  | -2.21893800 | 0.78763300  |
| C | 1.08611400  | -1.06334300 | 2.18477700  |
| C | 1.33408100  | -2.33709800 | 1.53505300  |
| H | 3.02316300  | -0.11842800 | -1.90191900 |
| H | 1.27048800  | 0.09501800  | -2.32694700 |
| C | 3.25189100  | -3.27082000 | 0.01787700  |
| H | 4.26071600  | -3.39686200 | 0.42872600  |
| H | 2.74055400  | -4.23134400 | 0.05239600  |
| H | 3.36256600  | -2.99453300 | -1.03629600 |
| C | 4.33756500  | -0.34861300 | 0.48011600  |
| H | 5.05813300  | -0.45694200 | 1.30057100  |
| H | 4.71610200  | -0.92168600 | -0.36861000 |
| H | 4.31318400  | 0.70985200  | 0.20752700  |
| C | 2.33575700  | 1.22218400  | 2.37198200  |
| H | 2.91616800  | 1.17859000  | 3.30138100  |
| H | 2.88803800  | 1.84830900  | 1.66876700  |
| H | 1.38989000  | 1.72003500  | 2.59648100  |
| C | -0.06085200 | -0.80672400 | 3.10571400  |
| H | 0.08647900  | -1.34391500 | 4.05120700  |
| H | -0.16875300 | 0.25349200  | 3.33928200  |
| H | -1.00157900 | -1.16909400 | 2.67738400  |

|    |             |             |             |
|----|-------------|-------------|-------------|
| C  | 0.47913600  | -3.54899300 | 1.74554000  |
| H  | 0.48710200  | -3.83538400 | 2.80328100  |
| H  | -0.56136200 | -3.35053900 | 1.46911600  |
| H  | 0.82343300  | -4.40024400 | 1.15910700  |
| Co | 0.98719000  | -0.73726800 | -0.16336000 |
| N  | -0.42358700 | -1.54557600 | -1.15259500 |
| N  | -0.42754100 | -3.11628200 | -1.51216800 |
| N  | 0.51859600  | -3.75759400 | -1.40841900 |
| C  | -2.85121900 | -0.33630600 | -0.86568700 |
| C  | -3.47134800 | 0.90942100  | -0.96374100 |
| C  | -3.16740000 | -1.22218000 | 0.16724900  |
| C  | -4.41067400 | 1.27419400  | 0.00044200  |
| H  | -3.19977400 | 1.58678600  | -1.76586000 |
| C  | -4.09940700 | -0.83556800 | 1.12792200  |
| H  | -2.68251500 | -2.19100600 | 0.22418000  |
| C  | -4.73639400 | 0.41560200  | 1.06059100  |
| H  | -4.89672800 | 2.24321400  | -0.07109100 |
| H  | -4.34688600 | -1.51735400 | 1.93708400  |
| S  | -1.62251000 | -0.77645100 | -2.09207700 |
| O  | -2.17848400 | -1.73528200 | -3.04227500 |
| O  | -1.01476200 | 0.47892800  | -2.56544300 |
| C  | -5.77307300 | 0.80581700  | 2.08414600  |
| H  | -5.85507100 | 1.89167000  | 2.18285100  |
| H  | -6.75976800 | 0.42960000  | 1.78902300  |
| H  | -5.54693000 | 0.38506600  | 3.06819600  |

<sup>12</sup>Mn, -2329.25440412

|   |             |            |             |
|---|-------------|------------|-------------|
| C | 0.96655600  | 2.37229300 | -0.81335400 |
| C | -0.43152500 | 2.46295100 | -0.51182700 |
| C | -0.60840600 | 2.18679200 | 0.87647300  |
| C | 1.65369800  | 2.04522500 | 0.40494300  |
| C | 0.67280600  | 1.91695800 | 1.44618000  |
| C | 3.13544800  | 1.92040800 | 0.58090100  |
| H | 3.62219700  | 1.63338600 | -0.35284500 |
| H | 3.56201700  | 2.87669500 | 0.90419000  |
| H | 3.38050900  | 1.17339900 | 1.33957200  |
| C | 0.98556500  | 1.60628500 | 2.87841800  |
| H | 1.67378100  | 0.75914400 | 2.94924900  |
| H | 1.46449100  | 2.46707500 | 3.35791000  |
| H | 0.08658900  | 1.36882800 | 3.45044500  |
| C | -1.92401500 | 2.21007500 | 1.59245300  |
| H | -1.89332100 | 1.64143100 | 2.52312000  |
| H | -2.19424500 | 3.24240300 | 1.84214300  |
| H | -2.72593300 | 1.80054000 | 0.97287200  |

|   |             |             |             |
|---|-------------|-------------|-------------|
| C | -1.53838700 | 2.83137100  | -1.45617600 |
| H | -2.41366500 | 2.18930500  | -1.32222600 |
| H | -1.85638500 | 3.86400200  | -1.27411500 |
| H | -1.22439200 | 2.76267100  | -2.49930900 |
| C | 1.62411100  | 2.59930200  | -2.14126100 |
| H | 2.10709800  | 3.58214200  | -2.16920100 |
| H | 2.38604700  | 1.83848900  | -2.32766000 |
| H | 0.90434100  | 2.55966500  | -2.96171000 |
| C | 3.36124400  | -2.09824500 | -0.26466300 |
| C | 2.85609600  | -3.26677200 | -1.14698400 |
| H | 2.56627800  | -2.91281900 | -2.14018000 |
| H | 3.65557600  | -4.00426000 | -1.26349400 |
| H | 1.99796900  | -3.76814900 | -0.68715700 |
| C | 4.55385400  | -1.40101000 | -0.95291200 |
| H | 4.27071300  | -1.01153100 | -1.93384500 |
| H | 4.93262000  | -0.57305600 | -0.34519200 |
| H | 5.36780300  | -2.11923300 | -1.08655100 |
| C | 3.75378200  | -2.60670400 | 1.13057600  |
| H | 4.09585100  | -1.78762100 | 1.77010700  |
| H | 2.91219800  | -3.09555400 | 1.62805900  |
| H | 4.56841300  | -3.33067800 | 1.03953500  |
| C | 2.21871800  | -1.11374200 | -0.15777700 |
| O | 1.55699300  | -0.90127700 | 0.90858200  |
| O | 1.81630500  | -0.42517700 | -1.16729200 |
| C | -3.52258100 | -0.86790300 | -2.21815200 |
| C | -2.33048000 | -0.72154200 | -1.53357800 |
| C | -2.32849000 | -0.90391300 | -0.12065800 |
| C | -3.52534100 | -1.32583300 | 0.54029700  |
| C | -4.72544900 | -1.45652900 | -0.20677900 |
| C | -4.72598800 | -1.21238700 | -1.55936700 |
| H | -3.53041900 | -0.73795800 | -3.29655500 |
| C | -3.46129800 | -1.62078300 | 1.92415400  |
| H | -5.63217600 | -1.76084700 | 0.30703700  |
| H | -5.64070200 | -1.31016800 | -2.13456200 |
| C | -2.26210400 | -1.50856800 | 2.58865600  |
| C | -1.14037700 | -1.02965900 | 1.88817400  |
| H | -4.35938100 | -1.94761300 | 2.44037500  |
| H | -2.16594000 | -1.75415800 | 3.64003800  |
| H | -0.19416500 | -0.88927800 | 2.39371900  |
| N | -1.16578400 | -0.70041400 | 0.59792000  |
| C | -1.03619200 | -0.48708900 | -2.26040900 |
| H | -0.49829000 | 0.41111300  | -1.90477000 |
| H | -0.36232300 | -1.34394200 | -2.18390900 |
| H | -1.19694700 | -0.27781400 | -3.32075900 |

|                                 |             |             |             |
|---------------------------------|-------------|-------------|-------------|
| Mn                              | 0.40721700  | 0.43132200  | -0.10056200 |
| <sup>32</sup> Mn, -2329.2789057 |             |             |             |
| C                               | 0.78374700  | 2.30815100  | -1.15030400 |
| C                               | -0.54389600 | 2.34518800  | -0.63738100 |
| C                               | -0.46941400 | 2.32356400  | 0.80547400  |
| C                               | 1.68349000  | 2.21836200  | -0.02700800 |
| C                               | 0.89488300  | 2.27289800  | 1.18263300  |
| C                               | 3.17977200  | 2.16607500  | -0.09408100 |
| H                               | 3.51610900  | 1.73003700  | -1.03724300 |
| H                               | 3.60582200  | 3.17310200  | -0.01863800 |
| H                               | 3.58729200  | 1.56684000  | 0.72359000  |
| C                               | 1.46202200  | 2.20201400  | 2.56625600  |
| H                               | 2.15975200  | 1.36387200  | 2.65334100  |
| H                               | 2.01271100  | 3.12083600  | 2.79567400  |
| H                               | 0.68280800  | 2.08179500  | 3.32101400  |
| C                               | -1.66264100 | 2.36113200  | 1.71023900  |
| H                               | -1.42107200 | 2.02314000  | 2.71911300  |
| H                               | -2.04598000 | 3.38538900  | 1.78196900  |
| H                               | -2.47218500 | 1.73400500  | 1.32718400  |
| C                               | -1.82007000 | 2.48756600  | -1.41258500 |
| H                               | -2.58966400 | 1.79618500  | -1.06063400 |
| H                               | -2.21094400 | 3.50455200  | -1.29445500 |
| H                               | -1.67320600 | 2.31157200  | -2.47912200 |
| C                               | 1.21277600  | 2.30441300  | -2.58627700 |
| H                               | 1.75233100  | 3.22786200  | -2.82219300 |
| H                               | 1.88138000  | 1.46219300  | -2.78735500 |
| H                               | 0.36166400  | 2.23100100  | -3.26534200 |
| C                               | 3.23510800  | -2.25695800 | -0.12286500 |
| C                               | 2.53281800  | -3.51301000 | 0.45066100  |
| H                               | 1.67668000  | -3.80467600 | -0.16657100 |
| H                               | 3.24013000  | -4.34734400 | 0.46322300  |
| H                               | 2.18617000  | -3.33801800 | 1.47272600  |
| C                               | 3.71046800  | -2.51513700 | -1.56063100 |
| H                               | 2.87828100  | -2.79364500 | -2.21184700 |
| H                               | 4.19023100  | -1.62874300 | -1.98574200 |
| H                               | 4.43883900  | -3.33096100 | -1.56223400 |
| C                               | 4.41617300  | -1.85344300 | 0.78519400  |
| H                               | 4.92134200  | -0.96023900 | 0.40294700  |
| H                               | 4.08015900  | -1.65265300 | 1.80524500  |
| H                               | 5.14694500  | -2.66662100 | 0.81343100  |
| C                               | 2.21238900  | -1.14365000 | -0.09945800 |
| O                               | 1.80817800  | -0.61966100 | 1.00047400  |
| O                               | 1.65657300  | -0.67784000 | -1.15647200 |
| C                               | -3.64518900 | -1.09591600 | -2.03802400 |

|    |             |             |             |
|----|-------------|-------------|-------------|
| C  | -2.38875500 | -0.94707700 | -1.47317400 |
| C  | -2.29029700 | -0.94939600 | -0.04724500 |
| C  | -3.46707800 | -1.20010000 | 0.73674100  |
| C  | -4.72834900 | -1.33620100 | 0.10162700  |
| C  | -4.81639100 | -1.26607600 | -1.26709100 |
| H  | -3.72878500 | -1.10283500 | -3.12095100 |
| C  | -3.33457000 | -1.33691500 | 2.13967900  |
| H  | -5.60780600 | -1.51230100 | 0.71346100  |
| H  | -5.77476600 | -1.37238800 | -1.76454200 |
| C  | -2.09360100 | -1.24025400 | 2.72442600  |
| C  | -0.99391100 | -0.92449000 | 1.90985400  |
| H  | -4.21990800 | -1.53638300 | 2.73695500  |
| H  | -1.94842600 | -1.37417600 | 3.79017000  |
| H  | -0.00969100 | -0.79862100 | 2.34585800  |
| N  | -1.07637900 | -0.74200000 | 0.58807100  |
| C  | -1.17562800 | -0.86094500 | -2.36089700 |
| H  | -0.70181300 | 0.12498900  | -2.33521200 |
| H  | -0.40969600 | -1.58266400 | -2.06977500 |
| H  | -1.44979000 | -1.05299800 | -3.40043100 |
| Mn | 0.49594300  | 0.49172600  | -0.03066800 |

<sup>52</sup>Mn, -2329.3038595

|   |             |            |             |
|---|-------------|------------|-------------|
| C | 0.69560100  | 2.48089100 | -0.99350600 |
| C | -0.55944200 | 2.49942200 | -0.39026400 |
| C | -0.37023500 | 2.27610700 | 1.06125600  |
| C | 1.68125200  | 2.22079800 | 0.06077200  |
| C | 1.00885700  | 2.17390200 | 1.32739500  |
| C | 3.15700500  | 2.14345800 | -0.15152200 |
| H | 3.39556000  | 1.65378400 | -1.09883600 |
| H | 3.58538900  | 3.15376000 | -0.18262200 |
| H | 3.64546800  | 1.59669400 | 0.65734100  |
| C | 1.68508100  | 1.96194600 | 2.65034800  |
| H | 2.30106400  | 1.05768800 | 2.63115900  |
| H | 2.33479600  | 2.80940100 | 2.89343600  |
| H | 0.95990300  | 1.86088900 | 3.46046500  |
| C | -1.49850600 | 2.27732300 | 2.04321500  |
| H | -1.20322200 | 1.85771900 | 3.00655700  |
| H | -1.84502600 | 3.30350700 | 2.21789300  |
| H | -2.35437700 | 1.70843100 | 1.66766200  |
| C | -1.89468100 | 2.77108200 | -1.01378100 |
| H | -2.61900300 | 1.98161400 | -0.78748100 |
| H | -2.30901900 | 3.70900300 | -0.62629900 |
| H | -1.82453900 | 2.86264000 | -2.09905800 |
| C | 1.04862400  | 2.65598500 | -2.43988200 |

|    |             |             |             |
|----|-------------|-------------|-------------|
| H  | 1.65351500  | 3.55835400  | -2.58294600 |
| H  | 1.63589500  | 1.80733000  | -2.80666500 |
| H  | 0.15922400  | 2.74826700  | -3.06619200 |
| C  | 3.52150600  | -2.15584900 | -0.28590500 |
| C  | 3.14261300  | -3.48027700 | 0.41518500  |
| H  | 2.28547200  | -3.95521800 | -0.07407900 |
| H  | 3.98625400  | -4.17497600 | 0.36388900  |
| H  | 2.89443600  | -3.30979400 | 1.46562000  |
| C  | 3.85579100  | -2.40313000 | -1.76375000 |
| H  | 3.01062700  | -2.85151100 | -2.29269500 |
| H  | 4.11454200  | -1.47149900 | -2.27428100 |
| H  | 4.70884000  | -3.08412100 | -1.83792000 |
| C  | 4.72206100  | -1.50745900 | 0.44070900  |
| H  | 5.00966400  | -0.56327900 | -0.03431800 |
| H  | 4.48654400  | -1.31375600 | 1.49018100  |
| H  | 5.58347400  | -2.18023700 | 0.39518200  |
| C  | 2.33810600  | -1.20928000 | -0.14499800 |
| O  | 1.90361000  | -0.87243000 | 1.00234000  |
| O  | 1.74858400  | -0.71611400 | -1.18129300 |
| C  | -3.82943400 | -0.88273000 | -2.10314800 |
| C  | -2.57651200 | -0.77241100 | -1.52391800 |
| C  | -2.47417000 | -0.96781600 | -0.11240700 |
| C  | -3.63622100 | -1.34439800 | 0.63975300  |
| C  | -4.89522000 | -1.43429200 | -0.00768200 |
| C  | -4.98947400 | -1.19137400 | -1.35670200 |
| H  | -3.92098400 | -0.74618900 | -3.17683000 |
| C  | -3.48376200 | -1.64305200 | 2.01536300  |
| H  | -5.76825400 | -1.71058100 | 0.57556600  |
| H  | -5.94672200 | -1.26185000 | -1.86257200 |
| C  | -2.24011400 | -1.57892600 | 2.60305300  |
| C  | -1.15412500 | -1.14995500 | 1.82321400  |
| H  | -4.35667600 | -1.93711800 | 2.59144900  |
| H  | -2.08477800 | -1.83045800 | 3.64573500  |
| H  | -0.16296200 | -1.05767800 | 2.25844100  |
| N  | -1.26097500 | -0.82600100 | 0.53143000  |
| C  | -1.36330800 | -0.51451700 | -2.38157200 |
| H  | -0.97246600 | 0.50298000  | -2.25602100 |
| H  | -0.55125800 | -1.21759700 | -2.17152600 |
| H  | -1.61408500 | -0.61176200 | -3.44016500 |
| Mn | 0.40176900  | 0.32973000  | -0.05623200 |

<sup>1</sup>TS4\_Mn, -2675.95392664, i880.31

|   |             |             |            |
|---|-------------|-------------|------------|
| C | -0.02799200 | 0.35863800  | 2.31030500 |
| C | -0.44355000 | -1.00963100 | 2.23969600 |

|   |             |             |             |
|---|-------------|-------------|-------------|
| C | -1.87272200 | -1.02726100 | 2.13625200  |
| C | -2.33067800 | 0.33203500  | 2.09759900  |
| C | -1.18724600 | 1.18106800  | 2.20727400  |
| C | 2.10205000  | 3.81839100  | -1.11008400 |
| C | 0.90177300  | 4.47074500  | -1.30333200 |
| C | -0.31346200 | 3.74385700  | -1.22544000 |
| C | -0.24796500 | 2.35154300  | -0.91986600 |
| C | 0.99203500  | 1.66630600  | -0.80904700 |
| C | 2.15317900  | 2.42159100  | -0.88817600 |
| H | -1.68390200 | 5.36289700  | -1.67769000 |
| H | 3.03221600  | 4.37671000  | -1.16528500 |
| H | 0.86939600  | 5.53572900  | -1.51498300 |
| C | -1.59785600 | 4.31039900  | -1.42077600 |
| H | 3.10916400  | 1.91207000  | -0.82536600 |
| C | -2.57086000 | 2.17145400  | -0.89899700 |
| C | -2.71848300 | 3.51958800  | -1.28834400 |
| H | -3.42870300 | 1.53325600  | -0.72819300 |
| H | -3.71464300 | 3.91809300  | -1.44739700 |
| N | -1.38412100 | 1.61340100  | -0.69312800 |
| C | 0.96729800  | 0.18586000  | -0.69561900 |
| H | 1.18959800  | -0.29379900 | 0.25391700  |
| H | 0.30726800  | -0.33622000 | -1.38448900 |
| H | 2.13085900  | -0.22805000 | -1.06160600 |
| C | 3.93547400  | -0.98485400 | -0.17183000 |
| C | 5.45876000  | -1.26286600 | -0.24318500 |
| O | 3.43325700  | -0.50327800 | -1.26516300 |
| O | 3.30386700  | -1.21362100 | 0.87484600  |
| C | -2.23444700 | -1.80042100 | -0.97349100 |
| C | -2.89346700 | -2.84644400 | -1.85778600 |
| O | -1.04349400 | -1.94071400 | -0.54781100 |
| O | -2.81559500 | -0.71376100 | -0.64442800 |
| C | 1.36973000  | 0.85742900  | 2.53187700  |
| H | 1.54993800  | 1.79007300  | 1.99083200  |
| H | 1.51778400  | 1.06027400  | 3.60012900  |
| H | 2.12374800  | 0.13658500  | 2.20898700  |
| C | -1.19554900 | 2.67959100  | 2.26496100  |
| H | -1.28733200 | 3.02236600  | 3.30249500  |
| H | -0.27307600 | 3.09912000  | 1.85772400  |
| H | -2.03006300 | 3.10250100  | 1.70068100  |
| C | -3.76679100 | 0.75697400  | 2.02187100  |
| H | -4.26632200 | 0.61170700  | 2.98713800  |
| H | -3.86118400 | 1.81276200  | 1.75775900  |
| H | -4.30390900 | 0.16894600  | 1.27221900  |
| C | -2.74705300 | -2.24467500 | 2.13389400  |

|    |             |             |             |
|----|-------------|-------------|-------------|
| H  | -3.05550500 | -2.50340200 | 3.15381700  |
| H  | -3.65090100 | -2.07859300 | 1.54235200  |
| H  | -2.22032500 | -3.10471000 | 1.71547700  |
| C  | 0.44946600  | -2.21368700 | 2.29640400  |
| H  | 0.55996900  | -2.56217500 | 3.33089600  |
| H  | 0.02506100  | -3.02984800 | 1.70682900  |
| H  | 1.44368700  | -1.99925900 | 1.89689400  |
| C  | 5.95570600  | -1.83035400 | 1.09229700  |
| H  | 7.03287100  | -2.03003300 | 1.04527800  |
| H  | 5.76451000  | -1.12937200 | 1.90957100  |
| H  | 5.43691700  | -2.76132700 | 1.33653200  |
| C  | 5.71685100  | -2.26809100 | -1.38302400 |
| H  | 5.22331600  | -3.22519300 | -1.17952800 |
| H  | 5.33006400  | -1.88048200 | -2.32867100 |
| H  | 6.79137400  | -2.45899300 | -1.49072800 |
| C  | 6.17326200  | 0.06680600  | -0.55869900 |
| H  | 5.99910500  | 0.80304500  | 0.23522400  |
| H  | 7.25573500  | -0.08769800 | -0.64075800 |
| H  | 5.80547200  | 0.48372700  | -1.49976400 |
| C  | -2.50895300 | -4.25064800 | -1.35611700 |
| H  | -2.90457500 | -4.43118200 | -0.35113900 |
| H  | -2.92492300 | -5.01076800 | -2.02534400 |
| H  | -1.42365800 | -4.36882700 | -1.32130000 |
| C  | -4.41848800 | -2.66126100 | -1.85098700 |
| H  | -4.88439300 | -3.39691900 | -2.51453800 |
| H  | -4.82821600 | -2.80149800 | -0.84551200 |
| H  | -4.69603500 | -1.66034300 | -2.19042300 |
| C  | -2.33212200 | -2.62612700 | -3.28333000 |
| H  | -2.57948400 | -1.62539900 | -3.65260400 |
| H  | -1.24455400 | -2.74131200 | -3.29507700 |
| H  | -2.76649200 | -3.36072600 | -3.96949100 |
| Mn | -1.13650800 | -0.12569200 | 0.37006700  |

<sup>3</sup>TS4\_Mn, -2675.96841211, i906.57

|   |             |             |             |
|---|-------------|-------------|-------------|
| C | 0.26200000  | 0.23809600  | 2.40653100  |
| C | -0.22028400 | -1.11514500 | 2.29183700  |
| C | -1.65373100 | -1.05768000 | 2.27658800  |
| C | -2.05455100 | 0.32009900  | 2.30952700  |
| C | -0.85704400 | 1.11134200  | 2.38873700  |
| C | 2.08500600  | 3.74820100  | -1.30505900 |
| C | 0.87590800  | 4.40081000  | -1.41376000 |
| C | -0.33083000 | 3.67737800  | -1.22750800 |
| C | -0.24529500 | 2.29006400  | -0.90803700 |
| C | 0.99994400  | 1.59940000  | -0.88472600 |



|   |             |             |             |
|---|-------------|-------------|-------------|
| C | 2.14981200  | 2.35282000  | -1.06569200 |
| H | -1.72756600 | 5.29441000  | -1.58550000 |
| H | 3.00974600  | 4.30126700  | -1.44158000 |
| H | 0.82843400  | 5.46233400  | -1.63929000 |
| C | -1.62542100 | 4.24438900  | -1.32354300 |
| H | 3.10786400  | 1.84272800  | -1.06895000 |
| C | -2.56886500 | 2.12315400  | -0.68804200 |
| C | -2.73889500 | 3.46452100  | -1.08900600 |
| H | -3.40322500 | 1.47709700  | -0.43888100 |
| H | -3.74139900 | 3.86928000  | -1.17297300 |
| N | -1.36664300 | 1.56905600  | -0.57861700 |
| C | 1.00212400  | 0.11427100  | -0.73881000 |
| H | 1.27957400  | -0.35350200 | 0.20752700  |
| H | 0.33236900  | -0.44259400 | -1.39396100 |
| H | 2.16246800  | -0.28604800 | -1.14155900 |
| C | 3.97526100  | -1.09504000 | -0.34607700 |
| C | 5.50534900  | -1.31808200 | -0.43529500 |
| O | 3.45258300  | -0.55125100 | -1.39977500 |
| O | 3.34940200  | -1.42168300 | 0.67846900  |
| C | -2.93917300 | -1.47738700 | -0.95497900 |
| C | -3.29228700 | -2.59642600 | -1.95153900 |
| O | -1.65969300 | -1.41207800 | -0.67272300 |
| O | -3.79374200 | -0.72795700 | -0.47334800 |
| C | 1.69442500  | 0.66570200  | 2.53532800  |
| H | 1.88871900  | 1.57906500  | 1.96500400  |
| H | 1.91741600  | 0.88058500  | 3.58796600  |
| H | 2.38733800  | -0.09912000 | 2.17960100  |
| C | -0.79820200 | 2.60922100  | 2.44967500  |
| H | -0.86584200 | 2.95608800  | 3.48766600  |
| H | 0.13731900  | 2.98824800  | 2.03208500  |
| H | -1.62073100 | 3.06601000  | 1.89366000  |
| C | -3.46441400 | 0.82555600  | 2.37577500  |
| H | -3.85714200 | 0.73728100  | 3.39628700  |
| H | -3.52197900 | 1.87974400  | 2.09344900  |
| H | -4.10957300 | 0.25919900  | 1.70178700  |
| C | -2.57980500 | -2.23580900 | 2.23946800  |
| H | -2.77873100 | -2.59243100 | 3.25729500  |
| H | -3.53000900 | -1.97312800 | 1.77223700  |
| H | -2.14295100 | -3.06101300 | 1.67334500  |
| C | 0.62067500  | -2.35893500 | 2.30018900  |
| H | 0.83126200  | -2.67222600 | 3.33077500  |
| H | 0.09883000  | -3.18207900 | 1.80538200  |
| H | 1.57287600  | -2.20506700 | 1.78715300  |
| C | 6.02469700  | -1.94618200 | 0.86412600  |

|    |             |             |             |
|----|-------------|-------------|-------------|
| H  | 7.10663500  | -2.11219200 | 0.80182900  |
| H  | 5.81927100  | -1.29809900 | 1.72085400  |
| H  | 5.53347300  | -2.90364100 | 1.05699900  |
| C  | 5.78984600  | -2.24760700 | -1.63206700 |
| H  | 5.32810700  | -3.23011300 | -1.48272500 |
| H  | 5.38718100  | -1.81886300 | -2.55308200 |
| H  | 6.86934400  | -2.39715700 | -1.75316700 |
| C  | 6.17751500  | 0.04892400  | -0.67493000 |
| H  | 5.98033900  | 0.73441700  | 0.15808700  |
| H  | 7.26414600  | -0.06731400 | -0.76302800 |
| H  | 5.79808700  | 0.50579300  | -1.59251000 |
| C  | -2.84877300 | -3.94457700 | -1.34503200 |
| H  | -3.37498500 | -4.14480600 | -0.40486000 |
| H  | -3.07779900 | -4.76134800 | -2.03815300 |
| H  | -1.77419100 | -3.94638500 | -1.14620600 |
| C  | -4.80418400 | -2.60236800 | -2.21382800 |
| H  | -5.05873300 | -3.39905500 | -2.92122600 |
| H  | -5.36261100 | -2.76643800 | -1.28820300 |
| H  | -5.13400500 | -1.64717300 | -2.63113000 |
| C  | -2.52052100 | -2.33894200 | -3.26292100 |
| H  | -2.80469900 | -1.37675200 | -3.70371100 |
| H  | -1.44230300 | -2.33070800 | -3.08537500 |
| H  | -2.74837700 | -3.12351500 | -3.99279400 |
| Mn | -0.94030300 | -0.10884100 | 0.49830500  |

<sup>5</sup>TS4\_Mn, -2675.99186817, i1291.74

|   |             |             |             |
|---|-------------|-------------|-------------|
| C | 0.08932200  | 0.25567500  | 2.32932000  |
| C | -0.38925400 | -1.08558600 | 2.33022000  |
| C | -1.80762500 | -1.01785700 | 2.28280500  |
| C | -2.21946700 | 0.38991200  | 2.32802600  |
| C | -1.06811200 | 1.16461500  | 2.34889900  |
| C | 2.51428700  | 3.69268200  | -0.99518600 |
| C | 1.38269800  | 4.46680900  | -1.13414700 |
| C | 0.10736100  | 3.84736100  | -1.11886100 |
| C | 0.03098500  | 2.42845000  | -0.96153700 |
| C | 1.21113500  | 1.61902000  | -0.90098200 |
| C | 2.43105200  | 2.28375300  | -0.89367900 |
| H | -1.08789600 | 5.63736700  | -1.36001400 |
| H | 3.49366700  | 4.16234500  | -0.99526700 |
| H | 1.44876900  | 5.54508900  | -1.24868200 |
| C | -1.11410300 | 4.55974000  | -1.21921800 |
| H | 3.34042800  | 1.69291300  | -0.85747300 |
| C | -2.30084900 | 2.49904900  | -0.88780900 |
| C | -2.31518700 | 3.88997100  | -1.12627000 |

|   |             |             |             |
|---|-------------|-------------|-------------|
| H | -3.21295400 | 1.92827900  | -0.74302500 |
| H | -3.26259400 | 4.41249100  | -1.20259900 |
| N | -1.17622500 | 1.80475800  | -0.80393900 |
| C | 1.12304300  | 0.13233300  | -0.88441200 |
| H | 1.33565400  | -0.40894000 | 0.04102100  |
| H | 0.44974600  | -0.34149500 | -1.60149000 |
| H | 2.32624000  | -0.32716100 | -1.25450100 |
| C | 3.96134300  | -1.25646000 | -0.31066800 |
| C | 5.45700400  | -1.65171900 | -0.33582300 |
| O | 3.54608100  | -0.69092500 | -1.40750300 |
| O | 3.26323500  | -1.47052600 | 0.69258200  |
| C | -2.75255900 | -1.54267700 | -1.04978000 |
| C | -3.61981200 | -2.51017900 | -1.85929700 |
| O | -1.51593900 | -1.84927000 | -0.86599900 |
| O | -3.21392100 | -0.47207600 | -0.56948400 |
| C | 1.50716100  | 0.70707400  | 2.48709900  |
| H | 1.70450300  | 1.60783600  | 1.89813800  |
| H | 1.69681500  | 0.96021600  | 3.53945100  |
| H | 2.22141000  | -0.05883600 | 2.17925400  |
| C | -0.95092800 | 2.65649600  | 2.41177000  |
| H | -0.63237600 | 2.98403400  | 3.40934400  |
| H | -0.20739700 | 3.02817700  | 1.70020900  |
| H | -1.90062500 | 3.14611900  | 2.18550400  |
| C | -3.64759700 | 0.84162300  | 2.32401600  |
| H | -4.16450100 | 0.52113300  | 3.23699000  |
| H | -3.72332200 | 1.93013100  | 2.26555700  |
| H | -4.18134000 | 0.41502700  | 1.46940100  |
| C | -2.76237600 | -2.16846400 | 2.28051900  |
| H | -3.12349000 | -2.37463400 | 3.29679800  |
| H | -3.63331900 | -1.94519500 | 1.65864300  |
| H | -2.29163700 | -3.07727600 | 1.90045300  |
| C | 0.44973700  | -2.33308900 | 2.34622300  |
| H | 0.64067700  | -2.66518800 | 3.37451400  |
| H | -0.05746200 | -3.14977200 | 1.82459600  |
| H | 1.41432700  | -2.17673600 | 1.85685200  |
| C | 5.84929300  | -2.30398600 | 0.99595100  |
| H | 6.90779700  | -2.58855900 | 0.98222700  |
| H | 5.68195000  | -1.61856200 | 1.83145400  |
| H | 5.24857700  | -3.19792700 | 1.18397400  |
| C | 5.68125800  | -2.63478200 | -1.50237600 |
| H | 5.10294100  | -3.55396300 | -1.35642100 |
| H | 5.37176000  | -2.18443800 | -2.44862600 |
| H | 6.74031900  | -2.90985200 | -1.57095100 |
| C | 6.28749800  | -0.37351300 | -0.57152500 |

|    |             |             |             |
|----|-------------|-------------|-------------|
| H  | 6.13784200  | 0.34693400  | 0.24147700  |
| H  | 7.35614900  | -0.61420800 | -0.61345300 |
| H  | 5.99840700  | 0.10407100  | -1.51112300 |
| C  | -3.54569300 | -3.89873000 | -1.19020100 |
| H  | -3.95561500 | -3.86908700 | -0.17462900 |
| H  | -4.12879400 | -4.62377200 | -1.76806300 |
| H  | -2.51104400 | -4.24468000 | -1.13227900 |
| C  | -5.07170300 | -2.01571000 | -1.91057400 |
| H  | -5.68354500 | -2.71133900 | -2.49487900 |
| H  | -5.49778900 | -1.94052700 | -0.90587900 |
| H  | -5.13395800 | -1.02602800 | -2.37072600 |
| C  | -3.02496800 | -2.58811200 | -3.28226700 |
| H  | -3.05792600 | -1.61061400 | -3.77595400 |
| H  | -1.98492300 | -2.92159600 | -3.24823700 |
| H  | -3.60155000 | -3.29361700 | -3.89026700 |
| Mn | -0.99774600 | -0.16325100 | 0.21192300  |

<sup>15</sup>Mn, -2675.98630866

|   |             |             |             |
|---|-------------|-------------|-------------|
| C | 0.06056600  | 0.09302600  | 2.25575600  |
| C | -0.50295300 | -1.21690200 | 2.13482900  |
| C | -1.92377100 | -1.08341800 | 2.14080700  |
| C | -2.23565300 | 0.31795200  | 2.23425400  |
| C | -1.00852900 | 1.03716100  | 2.30632600  |
| C | 2.32180200  | 3.49859100  | -1.05961700 |
| C | 1.20295800  | 4.28683800  | -1.23856600 |
| C | -0.08957400 | 3.70751800  | -1.13591200 |
| C | -0.17195200 | 2.31796400  | -0.84209300 |
| C | 0.97849400  | 1.48981800  | -0.73958800 |
| C | 2.21882800  | 2.10527900  | -0.82175100 |
| H | -1.29778700 | 5.47272000  | -1.51079000 |
| H | 3.30889600  | 3.94863900  | -1.12435600 |
| H | 1.29433100  | 5.35006400  | -1.44175000 |
| C | -1.31222300 | 4.41266700  | -1.27159200 |
| H | 3.12125400  | 1.50787900  | -0.74111400 |
| C | -2.49107700 | 2.37502300  | -0.73578200 |
| C | -2.50322800 | 3.74071300  | -1.09398100 |
| H | -3.40510200 | 1.82609900  | -0.54517800 |
| H | -3.45617400 | 4.24872000  | -1.19969500 |
| N | -1.36326700 | 1.68797300  | -0.58871400 |
| C | 0.65632200  | 0.05672000  | -0.54381000 |
| H | 1.44374100  | -0.51962200 | -0.05846300 |
| H | 0.36921000  | -0.41372500 | -1.49174800 |
| H | 2.67162300  | -0.94107400 | -1.37213800 |
| C | 4.18399800  | -1.35242300 | -0.30930300 |

|   |             |             |             |
|---|-------------|-------------|-------------|
| C | 5.70671600  | -1.21496600 | -0.29567600 |
| O | 3.64345300  | -0.91049900 | -1.46569700 |
| O | 3.51228100  | -1.78119000 | 0.60934100  |
| C | -2.55924500 | -1.54913500 | -1.02331100 |
| C | -3.40989600 | -2.43513700 | -1.92870400 |
| O | -1.35114200 | -1.83865200 | -0.76924600 |
| O | -3.01601200 | -0.47476100 | -0.51013600 |
| C | 1.51186200  | 0.42573200  | 2.43705700  |
| H | 1.79290000  | 1.32557100  | 1.88317800  |
| H | 1.71786400  | 0.61311700  | 3.49845700  |
| H | 2.16337500  | -0.38549300 | 2.10900000  |
| C | -0.84923200 | 2.52303400  | 2.44509100  |
| H | -0.84236100 | 2.82203300  | 3.50047400  |
| H | 0.08742800  | 2.86453300  | 1.99737100  |
| H | -1.66307200 | 3.06260100  | 1.95330400  |
| C | -3.61976900 | 0.89476900  | 2.27479100  |
| H | -4.07419400 | 0.76230200  | 3.26442800  |
| H | -3.61356300 | 1.96576000  | 2.05643300  |
| H | -4.26263500 | 0.40419300  | 1.53840300  |
| C | -2.92099800 | -2.20299300 | 2.10668400  |
| H | -3.20463300 | -2.51280000 | 3.12008600  |
| H | -3.83039900 | -1.90124600 | 1.58074200  |
| H | -2.51148600 | -3.07654300 | 1.59375300  |
| C | 0.25977600  | -2.50345900 | 2.01441100  |
| H | 0.36801100  | -2.99585000 | 2.98906700  |
| H | -0.25970200 | -3.19059700 | 1.34137300  |
| H | 1.25947600  | -2.34013200 | 1.60619600  |
| C | 6.24711400  | -1.78679900 | 1.02201500  |
| H | 7.33694600  | -1.68756800 | 1.05107300  |
| H | 5.82418300  | -1.25992600 | 1.88129800  |
| H | 5.99044800  | -2.84452800 | 1.12547300  |
| C | 6.29790200  | -1.97733500 | -1.50034200 |
| H | 6.05994000  | -3.04481900 | -1.44604200 |
| H | 5.91002700  | -1.58656100 | -2.44402200 |
| H | 7.38810700  | -1.87421700 | -1.50201500 |
| C | 6.04726800  | 0.28854900  | -0.40880100 |
| H | 5.61045600  | 0.85468600  | 0.42129700  |
| H | 7.13326900  | 0.42457300  | -0.37517900 |
| H | 5.67416600  | 0.70699800  | -1.34710000 |
| C | -3.20911100 | -3.90607700 | -1.51686500 |
| H | -3.57495100 | -4.08179600 | -0.49971700 |
| H | -3.76263000 | -4.56470500 | -2.19482600 |
| H | -2.15097500 | -4.17583700 | -1.54900800 |
| C | -4.89049100 | -2.04105400 | -1.82641200 |

|    |             |             |             |
|----|-------------|-------------|-------------|
| H  | -5.49130500 | -2.66838600 | -2.49365400 |
| H  | -5.26256700 | -2.17155000 | -0.80548000 |
| H  | -5.03900300 | -0.99434400 | -2.10340100 |
| C  | -2.89704500 | -2.22233100 | -3.37138900 |
| H  | -3.01528500 | -1.17790200 | -3.67950000 |
| H  | -1.83858600 | -2.48635300 | -3.44755700 |
| H  | -3.46450400 | -2.84957000 | -4.06762200 |
| Mn | -1.19454700 | -0.10665200 | 0.39538800  |

<sup>35</sup>Mn, -2676.0028754

|   |             |             |             |
|---|-------------|-------------|-------------|
| C | 0.53844600  | -0.51663600 | 2.02788500  |
| C | -0.16817000 | -1.72951400 | 1.73980100  |
| C | -1.54599100 | -1.50614300 | 2.07290300  |
| C | -1.69963800 | -0.15995800 | 2.51468500  |
| C | -0.41116600 | 0.45923000  | 2.46607300  |
| C | 2.27611900  | 3.56312100  | -1.07619500 |
| C | 1.17040400  | 4.37301700  | -0.92129300 |
| C | -0.10236300 | 3.78731600  | -0.68733200 |
| C | -0.18290100 | 2.36855100  | -0.62180200 |
| C | 0.94267700  | 1.52836300  | -0.87297500 |
| C | 2.16847900  | 2.14965000  | -1.06188000 |
| H | -1.28721800 | 5.59836200  | -0.53437800 |
| H | 3.25168000  | 4.01351300  | -1.23851300 |
| H | 1.25856000  | 5.45504200  | -0.95898300 |
| C | -1.30226300 | 4.51299900  | -0.47879300 |
| H | 3.04915000  | 1.54271200  | -1.24422600 |
| C | -2.45135500 | 2.42864900  | -0.07536100 |
| C | -2.47102700 | 3.83402300  | -0.20254600 |
| H | -3.32934400 | 1.84893900  | 0.18784100  |
| H | -3.40571300 | 4.36279100  | -0.04902200 |
| N | -1.33912200 | 1.72391000  | -0.25823400 |
| C | 0.65472500  | 0.07083700  | -0.87064300 |
| H | 1.52873000  | -0.55704200 | -0.70468700 |
| H | 0.12946100  | -0.23898300 | -1.78220000 |
| H | 2.98436900  | -0.87056900 | -2.31182700 |
| C | 4.17962100  | -1.43323400 | -0.96762200 |
| C | 5.54828300  | -1.11751700 | -0.36735400 |
| O | 3.89157800  | -0.65065500 | -2.03644300 |
| O | 3.40238700  | -2.27109500 | -0.55680700 |
| C | -3.30040400 | -0.97642000 | -0.87976900 |
| C | -4.01885600 | -1.77011300 | -1.99149400 |
| O | -2.01168900 | -1.15162000 | -0.85347300 |
| O | -3.92688200 | -0.25356000 | -0.09076000 |
| C | 2.02376600  | -0.30825200 | 1.97083300  |

|    |             |             |             |
|----|-------------|-------------|-------------|
| H  | 2.28188000  | 0.63826700  | 1.48451700  |
| H  | 2.43971700  | -0.28141700 | 2.98587500  |
| H  | 2.51831100  | -1.11229800 | 1.42503400  |
| C  | -0.08915700 | 1.87781000  | 2.84118300  |
| H  | 0.14086700  | 1.96444400  | 3.91029000  |
| H  | 0.77646800  | 2.24697000  | 2.28432300  |
| H  | -0.92646600 | 2.54777300  | 2.62743800  |
| C  | -2.98330600 | 0.48801700  | 2.94503800  |
| H  | -3.22760900 | 0.23094500  | 3.98328800  |
| H  | -2.91436800 | 1.57788200  | 2.88602600  |
| H  | -3.80766000 | 0.17309700  | 2.30197200  |
| C  | -2.64380800 | -2.52052300 | 1.95218400  |
| H  | -2.72270400 | -3.11582000 | 2.87042100  |
| H  | -3.60536100 | -2.03812600 | 1.76868600  |
| H  | -2.45207000 | -3.20663900 | 1.12407300  |
| C  | 0.42765400  | -3.02314300 | 1.26610500  |
| H  | 0.66527300  | -3.68819400 | 2.10678600  |
| H  | -0.27173800 | -3.55284800 | 0.61313900  |
| H  | 1.34530300  | -2.85736900 | 0.69787200  |
| C  | 5.77089300  | -2.01702200 | 0.85659300  |
| H  | 6.75891200  | -1.82096800 | 1.28487100  |
| H  | 5.01625400  | -1.82982800 | 1.62539900  |
| H  | 5.71063100  | -3.07377600 | 0.58437100  |
| C  | 6.63077100  | -1.38111800 | -1.43704500 |
| H  | 6.63198900  | -2.43145800 | -1.74639500 |
| H  | 6.47001100  | -0.76093500 | -2.32242100 |
| H  | 7.61807200  | -1.14916300 | -1.02452300 |
| C  | 5.57396300  | 0.37010800  | 0.04869100  |
| H  | 4.77583700  | 0.59593900  | 0.76339300  |
| H  | 6.53198500  | 0.59907300  | 0.52661600  |
| H  | 5.45613100  | 1.02566900  | -0.81764400 |
| C  | -3.72297600 | -3.27062100 | -1.79101200 |
| H  | -4.10780500 | -3.62053000 | -0.82651000 |
| H  | -4.20439300 | -3.86111400 | -2.57895500 |
| H  | -2.64677600 | -3.45864100 | -1.81910200 |
| C  | -5.53032600 | -1.51416900 | -1.92696000 |
| H  | -6.04284900 | -2.07694400 | -2.71546200 |
| H  | -5.93759200 | -1.81901300 | -0.95913000 |
| H  | -5.75333800 | -0.45149400 | -2.05475000 |
| C  | -3.45574000 | -1.30925500 | -3.35167600 |
| H  | -3.64150200 | -0.24092800 | -3.51111400 |
| H  | -2.37731200 | -1.47977600 | -3.40042200 |
| H  | -3.93641300 | -1.86023500 | -4.16825500 |
| Mn | -0.92675100 | -0.15870200 | 0.40449800  |

<sup>55</sup>Mn, -2676.02532901

|   |             |             |             |
|---|-------------|-------------|-------------|
| C | 0.52006900  | -0.38853500 | 1.95856000  |
| C | -0.20174000 | -1.63359100 | 1.93514900  |
| C | -1.55560600 | -1.33880500 | 2.20898100  |
| C | -1.67490300 | 0.08319700  | 2.47077300  |
| C | -0.40196200 | 0.66183000  | 2.33886400  |
| C | 2.48304400  | 3.53875900  | -0.97152700 |
| C | 1.43196900  | 4.41460000  | -0.80452300 |
| C | 0.11101900  | 3.90777600  | -0.67996000 |
| C | -0.08904300 | 2.49888700  | -0.74704600 |
| C | 0.99579400  | 1.59656900  | -0.99989200 |
| C | 2.27022600  | 2.14112500  | -1.07256500 |
| H | -0.92449100 | 5.79168100  | -0.39859400 |
| H | 3.49681800  | 3.92220500  | -1.04746600 |
| H | 1.59876200  | 5.48656900  | -0.74732800 |
| C | -1.03373600 | 4.71095500  | -0.44351200 |
| H | 3.11640800  | 1.48378500  | -1.24736700 |
| C | -2.35562300 | 2.70624500  | -0.26898200 |
| C | -2.26398400 | 4.11741500  | -0.25608500 |
| H | -3.28532200 | 2.18120500  | -0.07167900 |
| H | -3.15336100 | 4.71051800  | -0.07078800 |
| N | -1.30737400 | 1.93385400  | -0.49890200 |
| C | 0.67116500  | 0.15659500  | -1.13286600 |
| H | 1.52008100  | -0.51187300 | -0.99660700 |
| H | 0.13527500  | -0.07063300 | -2.06243500 |
| H | 3.09125300  | -0.88817600 | -2.44782300 |
| C | 4.09050200  | -1.56108500 | -0.99782600 |
| C | 5.42685200  | -1.39056600 | -0.27818700 |
| O | 3.97844200  | -0.74400100 | -2.07558000 |
| O | 3.19799500  | -2.31758800 | -0.67215100 |
| C | -3.19210300 | -1.10332800 | -0.95350700 |
| C | -4.21197800 | -1.91235500 | -1.77038900 |
| O | -1.94972300 | -1.44934300 | -1.08850400 |
| O | -3.54022000 | -0.17666300 | -0.19441600 |
| C | 2.00874600  | -0.23363200 | 1.86781800  |
| H | 2.28559100  | 0.69657500  | 1.36210600  |
| H | 2.45682400  | -0.20861100 | 2.87032400  |
| H | 2.45849200  | -1.06200200 | 1.31896900  |
| C | -0.02299600 | 2.09697500  | 2.56374300  |
| H | 0.27940600  | 2.27271500  | 3.60430000  |
| H | 0.81533600  | 2.39342000  | 1.92721400  |
| H | -0.85369600 | 2.77374600  | 2.34424900  |
| C | -2.95607600 | 0.77984300  | 2.82018900  |



|    |             |             |             |
|----|-------------|-------------|-------------|
| H  | -3.26098900 | 0.55960400  | 3.85145100  |
| H  | -2.85552600 | 1.86533700  | 2.73264100  |
| H  | -3.76102500 | 0.46256200  | 2.15236800  |
| C  | -2.70171200 | -2.30574900 | 2.25232200  |
| H  | -2.96436100 | -2.56797800 | 3.28539100  |
| H  | -3.58879900 | -1.87148600 | 1.78318200  |
| H  | -2.46259000 | -3.23264900 | 1.72502600  |
| C  | 0.39058600  | -2.97867100 | 1.61724800  |
| H  | 0.76559000  | -3.47659600 | 2.52118300  |
| H  | -0.35243200 | -3.64029400 | 1.16289400  |
| H  | 1.22649200  | -2.89501100 | 0.91678800  |
| C  | 5.45782600  | -2.32360600 | 0.94058400  |
| H  | 6.42267800  | -2.23378800 | 1.44953900  |
| H  | 4.66689600  | -2.07163800 | 1.65184700  |
| H  | 5.31536000  | -3.36532500 | 0.64212000  |
| C  | 6.56482700  | -1.74747400 | -1.26000100 |
| H  | 6.48787800  | -2.78824200 | -1.59140700 |
| H  | 6.54305300  | -1.10209700 | -2.14161900 |
| H  | 7.53134000  | -1.62241000 | -0.76112200 |
| C  | 5.56289300  | 0.08241600  | 0.16807800  |
| H  | 4.74073300  | 0.37362800  | 0.82927800  |
| H  | 6.50149500  | 0.21209200  | 0.71653800  |
| H  | 5.56987000  | 0.75702400  | -0.69174300 |
| C  | -4.10236300 | -3.38980600 | -1.33780700 |
| H  | -4.34513400 | -3.50663400 | -0.27587000 |
| H  | -4.80214800 | -4.00507500 | -1.91453800 |
| H  | -3.08842000 | -3.76388800 | -1.49946300 |
| C  | -5.63134900 | -1.38709300 | -1.51779600 |
| H  | -6.35729400 | -1.96821200 | -2.09751700 |
| H  | -5.89299000 | -1.45947000 | -0.45859000 |
| H  | -5.71715900 | -0.33568200 | -1.80573900 |
| C  | -3.84713600 | -1.78167400 | -3.26340400 |
| H  | -3.90933400 | -0.73825900 | -3.59258000 |
| H  | -2.82984800 | -2.13756200 | -3.44353200 |
| H  | -4.54046100 | -2.37026600 | -3.87486100 |
| Mn | -0.91519300 | -0.24753200 | 0.15240700  |

<sup>22</sup>Fe, -2441.9998331

|   |             |            |             |
|---|-------------|------------|-------------|
| C | 0.81987600  | 2.28700500 | -1.11338300 |
| C | -0.52579300 | 2.32705800 | -0.63924600 |
| C | -0.49326000 | 2.28083900 | 0.79922700  |
| C | 1.68730000  | 2.18293100 | 0.03094300  |
| C | 0.86533900  | 2.21251200 | 1.21554200  |
| C | 3.18277600  | 2.11541500 | 0.00237800  |

|   |             |             |             |
|---|-------------|-------------|-------------|
| H | 3.53745300  | 1.67635400  | -0.93260000 |
| H | 3.61600100  | 3.11828300  | 0.08927600  |
| H | 3.56251400  | 1.51142300  | 0.82947800  |
| C | 1.38770600  | 2.11175400  | 2.61449700  |
| H | 2.08893500  | 1.27679500  | 2.70160800  |
| H | 1.92175300  | 3.02907300  | 2.88519400  |
| H | 0.58543400  | 1.96522200  | 3.33978000  |
| C | -1.70739600 | 2.31361600  | 1.67498900  |
| H | -1.49897200 | 1.93418500  | 2.67634500  |
| H | -2.06790900 | 3.34383500  | 1.77430200  |
| H | -2.51995600 | 1.71922900  | 1.24954900  |
| C | -1.77481100 | 2.49271100  | -1.45146000 |
| H | -2.56393500 | 1.81162500  | -1.12469500 |
| H | -2.15208200 | 3.51553500  | -1.33926300 |
| H | -1.59950700 | 2.31873700  | -2.51386200 |
| C | 1.28770600  | 2.28831400  | -2.53610000 |
| H | 1.86637700  | 3.19479400  | -2.74272500 |
| H | 1.93142300  | 1.42463300  | -2.72732600 |
| H | 0.45439900  | 2.25368800  | -3.23957300 |
| C | 3.21970600  | -2.22347500 | -0.15380200 |
| C | 2.54643900  | -3.50804700 | 0.38923000  |
| H | 1.69632100  | -3.80321700 | -0.23456500 |
| H | 3.27132400  | -4.32724500 | 0.38273900  |
| H | 2.19547000  | -3.36461500 | 1.41475000  |
| C | 3.69758300  | -2.43525700 | -1.59840100 |
| H | 2.86940400  | -2.71195600 | -2.25563600 |
| H | 4.16015500  | -1.52932700 | -2.00093900 |
| H | 4.44072700  | -3.23728200 | -1.62282500 |
| C | 4.39426000  | -1.81758300 | 0.76145900  |
| H | 4.88031000  | -0.90534000 | 0.39980300  |
| H | 4.05584300  | -1.64763800 | 1.78644300  |
| H | 5.14203700  | -2.61562100 | 0.77044300  |
| C | 2.17353900  | -1.13257000 | -0.10233600 |
| O | 1.75066300  | -0.64789700 | 1.00487100  |
| O | 1.62072600  | -0.63650100 | -1.14487900 |
| C | -3.62588500 | -1.04032100 | -2.05436600 |
| C | -2.36945300 | -0.91278100 | -1.48408600 |
| C | -2.27461600 | -0.93358000 | -0.05711800 |
| C | -3.45501400 | -1.19849000 | 0.71762700  |
| C | -4.71563500 | -1.31209500 | 0.07701200  |
| C | -4.80084400 | -1.21157300 | -1.28989000 |
| H | -3.70585500 | -1.03328400 | -3.13757800 |
| C | -3.32775500 | -1.37463300 | 2.11688800  |
| H | -5.59705300 | -1.49746700 | 0.68329400  |

|    |             |             |             |
|----|-------------|-------------|-------------|
| H  | -5.75896800 | -1.30018200 | -1.79133700 |
| C  | -2.08774600 | -1.29993000 | 2.70445100  |
| C  | -0.98663500 | -0.95691700 | 1.90157800  |
| H  | -4.21548200 | -1.58624600 | 2.70626600  |
| H  | -1.94319900 | -1.46471300 | 3.76599800  |
| H  | -0.00713000 | -0.83048400 | 2.34627100  |
| N  | -1.06333800 | -0.73762300 | 0.58700700  |
| C  | -1.15422900 | -0.84486600 | -2.37116900 |
| H  | -0.66471300 | 0.13227500  | -2.35020500 |
| H  | -0.39973000 | -1.57514200 | -2.07332300 |
| H  | -1.43129600 | -1.03949400 | -3.40948500 |
| Fe | 0.48243100  | 0.50853400  | -0.00851400 |

<sup>42</sup>Fe, -2441.99981471

|   |             |             |             |
|---|-------------|-------------|-------------|
| C | 0.66684800  | 2.42447700  | -1.04215000 |
| C | -0.58390600 | 2.44826300  | -0.41609600 |
| C | -0.36694300 | 2.29319500  | 1.04211500  |
| C | 1.66670200  | 2.20516000  | 0.00663600  |
| C | 1.00981000  | 2.19749600  | 1.28882900  |
| C | 3.13886100  | 2.11789800  | -0.21322500 |
| H | 3.37009900  | 1.67553900  | -1.18437100 |
| H | 3.57920300  | 3.12336200  | -0.18822700 |
| H | 3.61657200  | 1.52290500  | 0.56769200  |
| C | 1.70880900  | 2.01613600  | 2.60174200  |
| H | 2.30105700  | 1.09641900  | 2.59610200  |
| H | 2.38499500  | 2.85494600  | 2.79827600  |
| H | 1.00040200  | 1.96164900  | 3.43065500  |
| C | -1.48198200 | 2.30117100  | 2.03534200  |
| H | -1.16498400 | 1.92817400  | 3.01042800  |
| H | -1.85502000 | 3.32406400  | 2.17064500  |
| H | -2.32443400 | 1.69480200  | 1.69001400  |
| C | -1.92887800 | 2.70055700  | -1.02513900 |
| H | -2.65299300 | 1.93062100  | -0.74147900 |
| H | -2.32422300 | 3.66277700  | -0.67965000 |
| H | -1.88084300 | 2.73301400  | -2.11479700 |
| C | 0.99600400  | 2.58316400  | -2.49639700 |
| H | 1.56183800  | 3.50633000  | -2.66341200 |
| H | 1.60839800  | 1.74922200  | -2.85337100 |
| H | 0.09522100  | 2.62899900  | -3.11132600 |
| C | 3.40082500  | -2.20409900 | -0.24043100 |
| C | 2.94787000  | -3.48297800 | 0.50030000  |
| H | 2.05689900  | -3.91564500 | 0.03261600  |
| H | 3.74527400  | -4.23102700 | 0.46052300  |
| H | 2.72266400  | -3.26840600 | 1.54793400  |

|    |             |             |             |
|----|-------------|-------------|-------------|
| C  | 3.70143700  | -2.51208100 | -1.71421400 |
| H  | 2.82405900  | -2.92215700 | -2.22123100 |
| H  | 4.01025800  | -1.61240000 | -2.25361500 |
| H  | 4.51067900  | -3.24557200 | -1.77845000 |
| C  | 4.64683000  | -1.61217800 | 0.45602100  |
| H  | 4.98588300  | -0.70001400 | -0.04716700 |
| H  | 4.43522200  | -1.37611600 | 1.50186900  |
| H  | 5.46555400  | -2.33687100 | 0.42067500  |
| C  | 2.27800000  | -1.18356500 | -0.11109900 |
| O  | 1.89418700  | -0.76804400 | 1.02013100  |
| O  | 1.68366000  | -0.71310700 | -1.16045000 |
| C  | -3.77890500 | -0.97525800 | -2.05740300 |
| C  | -2.52085900 | -0.81651200 | -1.50055400 |
| C  | -2.39254400 | -0.95629000 | -0.08476900 |
| C  | -3.53603700 | -1.33137000 | 0.69583800  |
| C  | -4.80188000 | -1.47247500 | 0.07103100  |
| C  | -4.92148000 | -1.28136000 | -1.28419200 |
| H  | -3.88748300 | -0.88012300 | -3.13397200 |
| C  | -3.36012400 | -1.57802500 | 2.07908800  |
| H  | -5.65964700 | -1.74693000 | 0.67740000  |
| H  | -5.88396000 | -1.39119900 | -1.77282500 |
| C  | -2.11052700 | -1.46768100 | 2.64544300  |
| C  | -1.04371200 | -1.04191300 | 1.83735100  |
| H  | -4.21919800 | -1.87002600 | 2.67670300  |
| H  | -1.93541600 | -1.67947900 | 3.69387900  |
| H  | -0.04966000 | -0.91186000 | 2.25052900  |
| N  | -1.17326700 | -0.76130600 | 0.53744000  |
| C  | -1.32652900 | -0.56834000 | -2.38518100 |
| H  | -0.93084300 | 0.44924700  | -2.27823000 |
| H  | -0.50947400 | -1.26587000 | -2.17967000 |
| H  | -1.59800000 | -0.67640200 | -3.43761400 |
| Fe | 0.39022500  | 0.40561700  | -0.14074600 |

<sup>62</sup>Fe, -2441.99203713

|   |             |            |             |
|---|-------------|------------|-------------|
| C | 0.78638200  | 2.41292900 | -0.95418400 |
| C | -0.56688800 | 2.43524300 | -0.45100100 |
| C | -0.51957600 | 2.23680600 | 0.96314200  |
| C | 1.65791700  | 2.22598100 | 0.15662700  |
| C | 0.85119600  | 2.10430400 | 1.34457300  |
| C | 3.15396900  | 2.17332400 | 0.11554900  |
| H | 3.51487600  | 1.80872000 | -0.84928600 |
| H | 3.58057500  | 3.17160100 | 0.27219800  |
| H | 3.54799700  | 1.51964400 | 0.89729600  |
| C | 1.39566900  | 1.88445900 | 2.72193900  |

|   |             |             |             |
|---|-------------|-------------|-------------|
| H | 2.07995300  | 1.02988300  | 2.73626200  |
| H | 1.95779300  | 2.76294100  | 3.05920400  |
| H | 0.60233100  | 1.70114300  | 3.44961700  |
| C | -1.71601800 | 2.22712400  | 1.86623400  |
| H | -1.50850100 | 1.72653900  | 2.81443600  |
| H | -2.03508600 | 3.25024200  | 2.09804900  |
| H | -2.56586100 | 1.72037500  | 1.39882300  |
| C | -1.81576400 | 2.71475900  | -1.23241600 |
| H | -2.61929400 | 2.01454700  | -0.98254700 |
| H | -2.18419200 | 3.72220400  | -1.00470700 |
| H | -1.64732500 | 2.66620800  | -2.31003800 |
| C | 1.21911200  | 2.61036500  | -2.37729900 |
| H | 1.56697300  | 3.63755500  | -2.53776200 |
| H | 2.04091800  | 1.93711100  | -2.63674300 |
| H | 0.40410900  | 2.42708300  | -3.08150800 |
| C | 3.59003700  | -2.06700400 | -0.23556100 |
| C | 3.16100100  | -3.43309400 | 0.35233500  |
| H | 2.36706900  | -3.89068300 | -0.24729100 |
| H | 4.01828400  | -4.11255200 | 0.35042800  |
| H | 2.80594200  | -3.32435100 | 1.38028800  |
| C | 4.07841700  | -2.23046300 | -1.68213800 |
| H | 3.30263000  | -2.66464000 | -2.31790100 |
| H | 4.36843500  | -1.26882800 | -2.11452900 |
| H | 4.94971500  | -2.89147900 | -1.70054000 |
| C | 4.69478700  | -1.44399000 | 0.64707500  |
| H | 5.01820500  | -0.47571700 | 0.25155200  |
| H | 4.34678100  | -1.30396100 | 1.67339900  |
| H | 5.56421900  | -2.10745900 | 0.66191200  |
| C | 2.37474300  | -1.16031300 | -0.17945400 |
| O | 1.85531200  | -0.82650600 | 0.94397900  |
| O | 1.81564000  | -0.69967900 | -1.24144700 |
| C | -3.78006400 | -0.93188700 | -2.12984300 |
| C | -2.54123700 | -0.81481100 | -1.52428600 |
| C | -2.47206900 | -0.96890200 | -0.10720100 |
| C | -3.64977200 | -1.31264500 | 0.63307700  |
| C | -4.89488500 | -1.41358000 | -0.03984600 |
| C | -4.95757100 | -1.21090400 | -1.39770100 |
| H | -3.84802900 | -0.82422100 | -3.20851200 |
| C | -3.52268300 | -1.56559200 | 2.02050300  |
| H | -5.78343800 | -1.66392500 | 0.53152000  |
| H | -5.90468700 | -1.28874200 | -1.92119000 |
| C | -2.28890800 | -1.48488700 | 2.62811100  |
| C | -1.18645200 | -1.08925700 | 1.85371400  |
| H | -4.40663400 | -1.83533100 | 2.59154300  |

|    |             |             |             |
|----|-------------|-------------|-------------|
| H  | -2.15488600 | -1.69819000 | 3.68219700  |
| H  | -0.20368500 | -0.97765800 | 2.30304100  |
| N  | -1.27012600 | -0.81553900 | 0.55022500  |
| C  | -1.29792900 | -0.59945800 | -2.34772200 |
| H  | -0.84322800 | 0.38647900  | -2.17344200 |
| H  | -0.53914900 | -1.36478600 | -2.15582000 |
| H  | -1.52574800 | -0.62562700 | -3.41564900 |
| Fe | 0.41291200  | 0.26781100  | -0.10890300 |

<sup>2</sup>TS4\_Fe, -2788.6864875, i740.90

|   |             |             |             |
|---|-------------|-------------|-------------|
| C | 0.22797800  | 0.18778300  | 2.40487700  |
| C | -0.24996000 | -1.16529200 | 2.23893000  |
| C | -1.68138200 | -1.12360100 | 2.22626000  |
| C | -2.08690000 | 0.25075500  | 2.30739600  |
| C | -0.89727500 | 1.05227000  | 2.41493600  |
| C | 2.10241000  | 3.72317200  | -1.33881200 |
| C | 0.89286100  | 4.37798000  | -1.43417000 |
| C | -0.31260000 | 3.66330200  | -1.21221300 |
| C | -0.22409800 | 2.28278400  | -0.86737800 |
| C | 1.01759300  | 1.58976300  | -0.85673700 |
| C | 2.16750200  | 2.33261300  | -1.07610000 |
| H | -1.71192600 | 5.27683500  | -1.58265700 |
| H | 3.02562900  | 4.27048500  | -1.50543600 |
| H | 0.84444800  | 5.43506100  | -1.67957600 |
| C | -1.60796500 | 4.23152200  | -1.30354800 |
| H | 3.12230300  | 1.81669600  | -1.09381500 |
| C | -2.54451500 | 2.11815400  | -0.62908300 |
| C | -2.71756100 | 3.45449900  | -1.04922700 |
| H | -3.37756200 | 1.47213100  | -0.37536700 |
| H | -3.72162800 | 3.85509500  | -1.13464200 |
| N | -1.34201700 | 1.56806200  | -0.51375700 |
| C | 1.01215100  | 0.10559600  | -0.70032100 |
| H | 1.30234900  | -0.33698100 | 0.25182700  |
| H | 0.30688200  | -0.44568800 | -1.32077200 |
| H | 2.12770500  | -0.30577100 | -1.12430600 |
| C | 3.99077900  | -1.08385800 | -0.32990500 |
| C | 5.52576000  | -1.28341300 | -0.41707200 |
| O | 3.45683600  | -0.58061200 | -1.39459700 |
| O | 3.37692800  | -1.39283500 | 0.70933000  |
| C | -2.91007900 | -1.43215100 | -0.98086000 |
| C | -3.26344500 | -2.52402000 | -2.01120200 |
| O | -1.63581100 | -1.34668600 | -0.72635300 |
| O | -3.77787100 | -0.71775200 | -0.46025200 |
| C | 1.65469200  | 0.62195700  | 2.56320200  |

|    |             |             |             |
|----|-------------|-------------|-------------|
| H  | 1.84946800  | 1.54555600  | 2.00980900  |
| H  | 1.85617400  | 0.82304600  | 3.62285000  |
| H  | 2.36075000  | -0.13073500 | 2.20732500  |
| C  | -0.85037800 | 2.54667300  | 2.52820100  |
| H  | -0.91723600 | 2.85697000  | 3.57761700  |
| H  | 0.08128200  | 2.94503000  | 2.12043500  |
| H  | -1.67758400 | 3.01502800  | 1.98938300  |
| C  | -3.49946100 | 0.74464100  | 2.38095900  |
| H  | -3.89263800 | 0.61342800  | 3.39655000  |
| H  | -3.56347300 | 1.80826600  | 2.13952900  |
| H  | -4.13378200 | 0.19664800  | 1.68274000  |
| C  | -2.59557500 | -2.30747400 | 2.15152000  |
| H  | -2.77760800 | -2.70977100 | 3.15530400  |
| H  | -3.55189800 | -2.03445800 | 1.70426000  |
| H  | -2.15586800 | -3.10172000 | 1.54494300  |
| C  | 0.59906500  | -2.40066700 | 2.17368300  |
| H  | 0.79512200  | -2.77950500 | 3.18473300  |
| H  | 0.08750100  | -3.19009500 | 1.61745600  |
| H  | 1.55878300  | -2.20862300 | 1.68756300  |
| C  | 6.05925300  | -1.86932500 | 0.89622400  |
| H  | 7.14383300  | -2.01818400 | 0.83501600  |
| H  | 5.84462700  | -1.20349500 | 1.73693700  |
| H  | 5.58521900  | -2.82998200 | 1.11462400  |
| C  | 5.82377000  | -2.23748400 | -1.59079800 |
| H  | 5.38023100  | -3.22405900 | -1.41524800 |
| H  | 5.41025600  | -1.83937800 | -2.52069500 |
| H  | 6.90543000  | -2.37078500 | -1.71209100 |
| C  | 6.17318400  | 0.08859800  | -0.69278200 |
| H  | 5.96565700  | 0.79137300  | 0.12323300  |
| H  | 7.26159700  | -0.01007200 | -0.78097800 |
| H  | 5.78335400  | 0.51514400  | -1.62058500 |
| C  | -2.76851700 | -3.88258200 | -1.47314800 |
| H  | -3.26607600 | -4.13667400 | -0.53023800 |
| H  | -2.99096300 | -4.67760200 | -2.19339300 |
| H  | -1.68979200 | -3.86108900 | -1.29910900 |
| C  | -4.78143800 | -2.56110800 | -2.23253300 |
| H  | -5.03549900 | -3.33616400 | -2.96401000 |
| H  | -5.30898800 | -2.77612600 | -1.29918800 |
| H  | -5.14754800 | -1.59933300 | -2.60144600 |
| C  | -2.53720600 | -2.19462000 | -3.33212300 |
| H  | -2.85852500 | -1.22329300 | -3.72486600 |
| H  | -1.45507300 | -2.16342900 | -3.18335500 |
| H  | -2.76488900 | -2.95482300 | -4.08761800 |
| Fe | -0.95686300 | -0.08773600 | 0.54113300  |

<sup>4</sup>TS4\_Fe, -2788.68686498, i1371.96

|   |             |             |             |
|---|-------------|-------------|-------------|
| C | 0.02742000  | 0.39289800  | 2.32132100  |
| C | -0.37433700 | -0.99528800 | 2.30240800  |
| C | -1.78557100 | -1.01328900 | 2.28873300  |
| C | -2.27376700 | 0.37410600  | 2.34091800  |
| C | -1.16738900 | 1.22096700  | 2.36742500  |
| C | 2.46575500  | 3.64373100  | -1.16349600 |
| C | 1.31753000  | 4.39005100  | -1.30969800 |
| C | 0.05324400  | 3.75208300  | -1.22468500 |
| C | 0.00425900  | 2.34331400  | -0.98707200 |
| C | 1.20009600  | 1.56078100  | -0.90981900 |
| C | 2.40805800  | 2.24152600  | -0.97866300 |
| H | -1.17375900 | 5.50970800  | -1.53357600 |
| H | 3.43656600  | 4.12762300  | -1.21838200 |
| H | 1.36078100  | 5.46143800  | -1.48427800 |
| C | -1.18034200 | 4.44064500  | -1.33645300 |
| H | 3.32773000  | 1.66790000  | -0.93367700 |
| C | -2.32670900 | 2.38210700  | -0.87925900 |
| C | -2.36828500 | 3.75810600  | -1.18654000 |
| H | -3.22639000 | 1.80379000  | -0.69466500 |
| H | -3.32560200 | 4.26078400  | -1.27137100 |
| N | -1.18986600 | 1.70912700  | -0.77489700 |
| C | 1.13257300  | 0.07872200  | -0.79954200 |
| H | 1.31249900  | -0.38715200 | 0.16991600  |
| H | 0.44624700  | -0.44142200 | -1.46951600 |
| H | 2.33147400  | -0.39394500 | -1.15020800 |
| C | 4.04748600  | -1.16579700 | -0.20033900 |
| C | 5.53642600  | -1.57832500 | -0.30039000 |
| O | 3.54544500  | -0.74898500 | -1.33000700 |
| O | 3.43664500  | -1.23336100 | 0.87433000  |
| C | -2.70952000 | -1.57158900 | -1.05279200 |
| C | -3.53617700 | -2.53939700 | -1.90322400 |
| O | -1.45773300 | -1.81481300 | -0.89937000 |
| O | -3.22402500 | -0.55860600 | -0.50289600 |
| C | 1.41739400  | 0.92062400  | 2.47544900  |
| H | 1.56286100  | 1.82873500  | 1.88219400  |
| H | 1.58942600  | 1.19152300  | 3.52665000  |
| H | 2.17664100  | 0.19598700  | 2.17615800  |
| C | -1.14392200 | 2.71857400  | 2.40793600  |
| H | -0.78588800 | 3.08331600  | 3.37857700  |
| H | -0.47305300 | 3.12606200  | 1.64462200  |
| H | -2.13575000 | 3.14265500  | 2.23706000  |
| C | -3.72401500 | 0.74089500  | 2.34985400  |



|    |             |             |             |
|----|-------------|-------------|-------------|
| H  | -4.21033600 | 0.38851000  | 3.26803700  |
| H  | -3.86733000 | 1.82242100  | 2.29128900  |
| H  | -4.23647300 | 0.27806000  | 1.50137300  |
| C  | -2.67671500 | -2.21508200 | 2.29986700  |
| H  | -3.03758400 | -2.42666600 | 3.31483500  |
| H  | -3.54966000 | -2.05086400 | 1.66261600  |
| H  | -2.15107300 | -3.10117800 | 1.93825500  |
| C  | 0.54133000  | -2.18657700 | 2.34452100  |
| H  | 0.71823900  | -2.50556300 | 3.37956200  |
| H  | 0.10109600  | -3.03155100 | 1.80761300  |
| H  | 1.51093200  | -1.97347300 | 1.88829300  |
| C  | 6.03850100  | -2.05128100 | 1.06974700  |
| H  | 7.09222500  | -2.34634800 | 1.00563500  |
| H  | 5.94134500  | -1.25887000 | 1.81693100  |
| H  | 5.45634200  | -2.90590600 | 1.42470100  |
| C  | 5.65968600  | -2.71165300 | -1.33861700 |
| H  | 5.09182700  | -3.59437700 | -1.02411300 |
| H  | 5.27610500  | -2.38792600 | -2.30917200 |
| H  | 6.70852900  | -3.00895300 | -1.45414800 |
| C  | 6.34462100  | -0.35295900 | -0.77391800 |
| H  | 6.26576200  | 0.47076400  | -0.05457200 |
| H  | 7.40538300  | -0.61095400 | -0.87282600 |
| H  | 5.97772700  | -0.00057600 | -1.74120300 |
| C  | -3.41779900 | -3.94250800 | -1.27054900 |
| H  | -3.83332400 | -3.95362800 | -0.25676500 |
| H  | -3.97253600 | -4.67183600 | -1.87063500 |
| H  | -2.37194800 | -4.25384400 | -1.21572100 |
| C  | -5.00428100 | -2.09514300 | -1.95117200 |
| H  | -5.58779800 | -2.79448700 | -2.55960900 |
| H  | -5.43849800 | -2.06279500 | -0.94785800 |
| H  | -5.09847700 | -1.09552800 | -2.38410500 |
| C  | -2.92942500 | -2.55747200 | -3.32235200 |
| H  | -2.99491200 | -1.56887600 | -3.79018800 |
| H  | -1.87782800 | -2.85206100 | -3.28833200 |
| H  | -3.47471900 | -3.26705700 | -3.95410500 |
| Fe | -1.06912100 | -0.17030200 | 0.28365100  |

<sup>6</sup>TS4\_Fe, -2788.69175055, i1084.80

|   |             |             |             |
|---|-------------|-------------|-------------|
| C | 0.05231000  | 0.40459100  | 2.32131300  |
| C | -0.45028300 | -0.94380700 | 2.30893400  |
| C | -1.87402800 | -0.87554400 | 2.25678600  |
| C | -2.25497900 | 0.50866400  | 2.21236900  |
| C | -1.06601200 | 1.29399100  | 2.25332700  |
| C | 2.42460700  | 3.70828700  | -1.05723800 |

|   |             |             |             |
|---|-------------|-------------|-------------|
| C | 1.28043100  | 4.45838300  | -1.22563400 |
| C | 0.01630500  | 3.81720800  | -1.20088100 |
| C | -0.02964400 | 2.40472100  | -0.99065600 |
| C | 1.15879300  | 1.61692100  | -0.90495500 |
| C | 2.36728800  | 2.30087100  | -0.91736300 |
| H | -1.21369500 | 5.56722000  | -1.53736700 |
| H | 3.39521100  | 4.19558800  | -1.06679900 |
| H | 1.32864300  | 5.53326100  | -1.37474900 |
| C | -1.21801800 | 4.49604800  | -1.35273800 |
| H | 3.28594500  | 1.72599200  | -0.86321900 |
| C | -2.36940700 | 2.42585100  | -0.96009800 |
| C | -2.40696300 | 3.80298600  | -1.25940800 |
| H | -3.27089900 | 1.84193700  | -0.80723300 |
| H | -3.36358300 | 4.29949000  | -1.37876800 |
| N | -1.22862400 | 1.76536600  | -0.82126200 |
| C | 1.08457900  | 0.12688900  | -0.86409900 |
| H | 1.25542600  | -0.40424800 | 0.07557100  |
| H | 0.44889600  | -0.36016100 | -1.60631800 |
| H | 2.29345400  | -0.30818400 | -1.19223200 |
| C | 3.94988600  | -1.21060000 | -0.23859300 |
| C | 5.44693800  | -1.60300800 | -0.25408900 |
| O | 3.54050900  | -0.64151100 | -1.33481300 |
| O | 3.24578900  | -1.43323600 | 0.75873500  |
| C | -2.57130600 | -1.71700300 | -0.99218400 |
| C | -3.38559900 | -2.76246700 | -1.74875600 |
| O | -1.35501000 | -1.97791400 | -0.67992200 |
| O | -3.05485600 | -0.58625600 | -0.67586900 |
| C | 1.48574200  | 0.81370900  | 2.48218700  |
| H | 1.70112100  | 1.73672400  | 1.93609900  |
| H | 1.70779900  | 1.00163100  | 3.54123100  |
| H | 2.17634700  | 0.04752400  | 2.12276700  |
| C | -0.98545300 | 2.79148600  | 2.26867100  |
| H | -1.01265000 | 3.17973500  | 3.29471100  |
| H | -0.05758600 | 3.14544300  | 1.81168500  |
| H | -1.81610800 | 3.24897700  | 1.72410800  |
| C | -3.66662000 | 1.00635800  | 2.12836200  |
| H | -4.19953500 | 0.85450300  | 3.07538800  |
| H | -3.70347500 | 2.07464500  | 1.89949100  |
| H | -4.21830500 | 0.47216500  | 1.34773300  |
| C | -2.82452600 | -2.03452600 | 2.28207500  |
| H | -3.15226900 | -2.25531300 | 3.30592500  |
| H | -3.71721800 | -1.82273500 | 1.68691100  |
| H | -2.35808600 | -2.93661400 | 1.88019900  |
| C | 0.37607500  | -2.19521100 | 2.38380100  |

|    |             |             |             |
|----|-------------|-------------|-------------|
| H  | 0.53537400  | -2.49373900 | 3.42828800  |
| H  | -0.12621800 | -3.02276900 | 1.87529700  |
| H  | 1.35591600  | -2.06379600 | 1.91824900  |
| C  | 5.83425800  | -2.25063400 | 1.08131400  |
| H  | 6.89343900  | -2.53340200 | 1.07427200  |
| H  | 5.66090400  | -1.56304200 | 1.91383000  |
| H  | 5.23373200  | -3.14472000 | 1.26906500  |
| C  | 5.67813400  | -2.58925700 | -1.41656400 |
| H  | 5.10120600  | -3.50923100 | -1.26969400 |
| H  | 5.37047800  | -2.14222000 | -2.36507000 |
| H  | 6.73804400  | -2.86247600 | -1.48115300 |
| C  | 6.27725600  | -0.32494100 | -0.49026300 |
| H  | 6.12379500  | 0.39756300  | 0.32021100  |
| H  | 7.34651900  | -0.56412600 | -0.52800600 |
| H  | 5.99041400  | 0.14975300  | -1.43205200 |
| C  | -3.29667300 | -4.10015500 | -0.98558100 |
| H  | -3.75273000 | -4.01837200 | 0.00654100  |
| H  | -3.82952800 | -4.87979000 | -1.53990800 |
| H  | -2.25551900 | -4.40622100 | -0.86050200 |
| C  | -4.84708500 | -2.31286300 | -1.88305500 |
| H  | -5.41867800 | -3.06607000 | -2.43533900 |
| H  | -5.31041400 | -2.18074200 | -0.90081300 |
| H  | -4.91963100 | -1.36106100 | -2.41556100 |
| C  | -2.73616900 | -2.91577700 | -3.14322400 |
| H  | -2.77764400 | -1.97457500 | -3.70219300 |
| H  | -1.68973700 | -3.21760300 | -3.05169300 |
| H  | -3.27221200 | -3.67656400 | -3.72034900 |
| Fe | -1.06219400 | -0.10760200 | 0.17933300  |

<sup>25</sup>Fe, -2788.72390994

|   |             |             |             |
|---|-------------|-------------|-------------|
| C | 0.39339700  | -0.31861000 | 2.20662700  |
| C | -0.25553600 | -1.56747000 | 1.92006900  |
| C | -1.66584100 | -1.37868500 | 2.10793800  |
| C | -1.89271200 | -0.01179100 | 2.45578200  |
| C | -0.61661600 | 0.64228400  | 2.49880200  |
| C | 2.27704900  | 3.46195700  | -1.20887200 |
| C | 1.15819800  | 4.26706900  | -1.15525200 |
| C | -0.11089900 | 3.68904500  | -0.88445500 |
| C | -0.16717200 | 2.28567400  | -0.66845600 |
| C | 0.96911200  | 1.44213800  | -0.81046900 |
| C | 2.18871300  | 2.05485300  | -1.05017500 |
| H | -1.33689700 | 5.47889700  | -0.95531100 |
| H | 3.24891400  | 3.90802400  | -1.40208800 |
| H | 1.23305900  | 5.34040600  | -1.30468200 |

|   |             |             |             |
|---|-------------|-------------|-------------|
| C | -1.33093300 | 4.40546600  | -0.78445000 |
| H | 3.08043800  | 1.44683200  | -1.16010100 |
| C | -2.44887200 | 2.34565300  | -0.20094200 |
| C | -2.49312100 | 3.73195700  | -0.47359700 |
| H | -3.32557400 | 1.77157600  | 0.07789800  |
| H | -3.44341200 | 4.25062000  | -0.40607800 |
| N | -1.31733600 | 1.65671600  | -0.27035700 |
| C | 0.67100700  | -0.00960900 | -0.67660900 |
| H | 1.52479500  | -0.60407100 | -0.35197900 |
| H | 0.25288700  | -0.41824800 | -1.60480400 |
| H | 2.78467900  | -1.05937900 | -1.89007500 |
| C | 4.21584000  | -1.43293100 | -0.71531400 |
| C | 5.68544300  | -1.09401900 | -0.47147800 |
| O | 3.73923400  | -0.86877300 | -1.84960900 |
| O | 3.52026100  | -2.11253600 | 0.01339000  |
| C | -3.21268100 | -1.04892900 | -0.97148200 |
| C | -3.81939000 | -1.91906800 | -2.09613600 |
| O | -1.92242000 | -1.13535900 | -0.88154800 |
| O | -3.93199100 | -0.34734300 | -0.24235800 |
| C | 1.87067000  | -0.06037100 | 2.25324800  |
| H | 2.13626900  | 0.85276300  | 1.71051300  |
| H | 2.19646600  | 0.06674800  | 3.29300200  |
| H | 2.43960800  | -0.88393400 | 1.82002000  |
| C | -0.37216200 | 2.08904500  | 2.81425800  |
| H | -0.27709900 | 2.24763400  | 3.89539700  |
| H | 0.54726400  | 2.44563800  | 2.34261400  |
| H | -1.19162100 | 2.71934200  | 2.45839500  |
| C | -3.22180600 | 0.61173500  | 2.76439400  |
| H | -3.52483800 | 0.39761100  | 3.79692000  |
| H | -3.18381700 | 1.69921100  | 2.65547800  |
| H | -3.98849400 | 0.23408400  | 2.08553400  |
| C | -2.71636600 | -2.43879800 | 1.96382000  |
| H | -2.84750400 | -2.98570100 | 2.90570400  |
| H | -3.67366100 | -2.00148600 | 1.67677000  |
| H | -2.43805200 | -3.16118800 | 1.19291700  |
| C | 0.41803400  | -2.85731600 | 1.55269000  |
| H | 0.63016000  | -3.46176800 | 2.44386200  |
| H | -0.22187500 | -3.45141900 | 0.89461400  |
| H | 1.36137700  | -2.68497400 | 1.03091500  |
| C | 6.13569300  | -1.75676600 | 0.83776200  |
| H | 7.19100900  | -1.53289700 | 1.02286200  |
| H | 5.54831100  | -1.39251800 | 1.68499100  |
| H | 6.01120600  | -2.84172500 | 0.79213300  |
| C | 6.52303900  | -1.61547700 | -1.65923700 |

|    |             |             |             |
|----|-------------|-------------|-------------|
| H  | 6.44172200  | -2.70351700 | -1.75116400 |
| H  | 6.19736500  | -1.16488300 | -2.60001600 |
| H  | 7.57781100  | -1.36770800 | -1.50142000 |
| C  | 5.81994600  | 0.44193800  | -0.36966100 |
| H  | 5.18729400  | 0.84270300  | 0.42975800  |
| H  | 6.85828100  | 0.70502200  | -0.14322900 |
| H  | 5.53852500  | 0.92604100  | -1.30824400 |
| C  | -3.43793200 | -3.39031100 | -1.83467300 |
| H  | -3.85002500 | -3.73816400 | -0.88061400 |
| H  | -3.83652900 | -4.03439900 | -2.62703400 |
| H  | -2.35170500 | -3.50650400 | -1.80101900 |
| C  | -5.34567800 | -1.76330100 | -2.11607900 |
| H  | -5.77876400 | -2.38002000 | -2.91205800 |
| H  | -5.78213500 | -2.06802000 | -1.16101300 |
| H  | -5.63023900 | -0.72156600 | -2.28652200 |
| C  | -3.21846500 | -1.46030700 | -3.44033100 |
| H  | -3.46513200 | -0.41155000 | -3.64174700 |
| H  | -2.13007900 | -1.55853800 | -3.42919500 |
| H  | -3.61852500 | -2.06428500 | -4.26309700 |
| Fe | -0.97401800 | -0.16027400 | 0.49602200  |

<sup>45</sup>Fe, -2788.71949926

|   |             |             |             |
|---|-------------|-------------|-------------|
| C | 0.55497500  | -0.15566700 | 1.98597400  |
| C | -0.03758400 | -1.47884200 | 2.00258000  |
| C | -1.41846900 | -1.31388400 | 2.24337100  |
| C | -1.69037200 | 0.10371800  | 2.39103100  |
| C | -0.46893500 | 0.80481800  | 2.27735900  |
| C | 2.16761200  | 3.48844200  | -1.46418300 |
| C | 1.03384600  | 4.27001300  | -1.40843300 |
| C | -0.22725400 | 3.66051500  | -1.16852600 |
| C | -0.27584400 | 2.24840800  | -0.99742300 |
| C | 0.89084500  | 1.43085000  | -1.13179600 |
| C | 2.10093200  | 2.07774900  | -1.33297600 |
| H | -1.45965600 | 5.44458600  | -1.17904900 |
| H | 3.13488200  | 3.95458300  | -1.63043900 |
| H | 1.08993200  | 5.34833800  | -1.52781600 |
| C | -1.45118600 | 4.36585300  | -1.04430300 |
| H | 3.00785300  | 1.48965400  | -1.42898700 |
| C | -2.55417800 | 2.28753500  | -0.52275500 |
| C | -2.61111100 | 3.68283600  | -0.74358900 |
| H | -3.42288100 | 1.70096500  | -0.23887200 |
| H | -3.55974700 | 4.20012500  | -0.64632000 |
| N | -1.42513000 | 1.60590600  | -0.63408100 |
| C | 0.69435000  | -0.03491100 | -1.02065200 |

|   |             |             |             |
|---|-------------|-------------|-------------|
| H | 1.59387500  | -0.60177200 | -0.78855100 |
| H | 0.17790900  | -0.45585400 | -1.89182100 |
| H | 3.23771700  | -1.00605400 | -2.29429400 |
| C | 4.31608200  | -1.29599800 | -0.77661400 |
| C | 5.61426200  | -0.83433900 | -0.11773700 |
| O | 4.09540600  | -0.68401800 | -1.96716300 |
| O | 3.53534600  | -2.10604700 | -0.31928200 |
| C | -3.23552900 | -1.41669800 | -0.88738600 |
| C | -3.97719700 | -2.44952300 | -1.76164400 |
| O | -1.93793700 | -1.53152800 | -0.90694900 |
| O | -3.85211900 | -0.57113600 | -0.22333500 |
| C | 2.02175300  | 0.14106000  | 1.91004300  |
| H | 2.22022800  | 1.04403300  | 1.32399800  |
| H | 2.42837100  | 0.30679100  | 2.91642800  |
| H | 2.57160600  | -0.68498300 | 1.45769600  |
| C | -0.26100900 | 2.28780900  | 2.38235200  |
| H | -0.03871300 | 2.59218900  | 3.41323200  |
| H | 0.57369200  | 2.61793600  | 1.75720100  |
| H | -1.14705000 | 2.84273800  | 2.06071500  |
| C | -3.04182700 | 0.68875300  | 2.67330200  |
| H | -3.33511500 | 0.51646700  | 3.71690500  |
| H | -3.04997600 | 1.76921800  | 2.50488900  |
| H | -3.79691400 | 0.24068700  | 2.02360700  |
| C | -2.46023100 | -2.39067000 | 2.32828400  |
| H | -2.69411800 | -2.63430800 | 3.37265300  |
| H | -3.38617300 | -2.07164300 | 1.84293100  |
| H | -2.12499300 | -3.30846300 | 1.83912800  |
| C | 0.70995000  | -2.76820600 | 1.81617100  |
| H | 1.13583900  | -3.12373000 | 2.76398100  |
| H | 0.05028100  | -3.55412100 | 1.43819900  |
| H | 1.53364200  | -2.65815900 | 1.10606600  |
| C | 5.76103600  | -1.54015000 | 1.23772600  |
| H | 6.70296500  | -1.24219600 | 1.70884200  |
| H | 4.93986700  | -1.27850800 | 1.91033200  |
| H | 5.75780000  | -2.62647000 | 1.11799200  |
| C | 6.79398000  | -1.19775600 | -1.04653100 |
| H | 6.85664600  | -2.28015600 | -1.19943900 |
| H | 6.69120300  | -0.71662500 | -2.02237100 |
| H | 7.73316900  | -0.86578900 | -0.59227900 |
| C | 5.55374000  | 0.69704400  | 0.07742200  |
| H | 4.69303100  | 0.98518000  | 0.68932300  |
| H | 6.46119500  | 1.03564500  | 0.58770900  |
| H | 5.48416000  | 1.21587300  | -0.88193700 |
| C | -3.62653800 | -3.85788100 | -1.23730500 |

|    |             |             |             |
|----|-------------|-------------|-------------|
| H  | -3.95460000 | -3.98266000 | -0.19921700 |
| H  | -4.12535000 | -4.62331400 | -1.84282100 |
| H  | -2.54743200 | -4.02602500 | -1.27701400 |
| C  | -5.49175700 | -2.21675800 | -1.68421400 |
| H  | -6.01981300 | -2.95350900 | -2.30034600 |
| H  | -5.84815000 | -2.30229700 | -0.65418400 |
| H  | -5.75250300 | -1.21535900 | -2.03763600 |
| C  | -3.48608600 | -2.30244100 | -3.21602300 |
| H  | -3.71524500 | -1.30507800 | -3.60842100 |
| H  | -2.40538400 | -2.45313400 | -3.27474100 |
| H  | -3.98021200 | -3.03912900 | -3.85996000 |
| Fe | -0.89326900 | -0.33481700 | 0.23698900  |

<sup>65</sup>Fe, -2788.716875

|   |             |             |             |
|---|-------------|-------------|-------------|
| C | 0.48220500  | -0.07271900 | 2.01026900  |
| C | -0.21129400 | -1.32233600 | 1.99634500  |
| C | -1.60688700 | -1.05002300 | 2.16285500  |
| C | -1.77548100 | 0.36548200  | 2.24920200  |
| C | -0.48330200 | 0.96877400  | 2.15652900  |
| C | 2.41087800  | 3.46119800  | -1.34966900 |
| C | 1.33006700  | 4.31817200  | -1.32822000 |
| C | 0.02316600  | 3.78433900  | -1.18377700 |
| C | -0.12639400 | 2.37072200  | -1.07386800 |
| C | 0.98618400  | 1.47400900  | -1.19652500 |
| C | 2.24471500  | 2.05593800  | -1.29435400 |
| H | -1.08437400 | 5.64711200  | -1.20049600 |
| H | 3.41514000  | 3.86625600  | -1.44127300 |
| H | 1.46243300  | 5.39346900  | -1.40594900 |
| C | -1.15635900 | 4.56687500  | -1.10164800 |
| H | 3.11706700  | 1.41473300  | -1.36935700 |
| C | -2.41946600 | 2.56039000  | -0.69749700 |
| C | -2.37580000 | 3.95962000  | -0.88434700 |
| H | -3.33804000 | 2.03595800  | -0.45540800 |
| H | -3.29101700 | 4.53831300  | -0.81914700 |
| N | -1.33463900 | 1.80774300  | -0.77775200 |
| C | 0.68769700  | 0.02547300  | -1.17238900 |
| H | 1.53045100  | -0.61010200 | -0.90511500 |
| H | 0.23676200  | -0.31399000 | -2.11639500 |
| H | 3.14067500  | -1.04052400 | -2.17890400 |
| C | 4.17870200  | -1.50292800 | -0.67460100 |
| C | 5.50320300  | -1.18038300 | 0.01499400  |
| O | 4.03305900  | -0.83663700 | -1.84719600 |
| O | 3.32205400  | -2.25178000 | -0.25078300 |
| C | -2.91522200 | -1.63521600 | -0.95007000 |

|   |             |             |             |
|---|-------------|-------------|-------------|
| C | -3.97502100 | -2.52869700 | -1.59779600 |
| O | -1.72463100 | -2.08123900 | -0.81477900 |
| O | -3.18720000 | -0.45723600 | -0.56289200 |
| C | 1.96578800  | 0.12223400  | 1.92641600  |
| H | 2.22211600  | 0.97024800  | 1.28317800  |
| H | 2.39603700  | 0.32205500  | 2.91700800  |
| H | 2.45807100  | -0.76264000 | 1.52075100  |
| C | -0.17716100 | 2.43537700  | 2.23520400  |
| H | -0.02929100 | 2.75852100  | 3.27419900  |
| H | 0.73363700  | 2.68357400  | 1.68312600  |
| H | -0.98672900 | 3.04206400  | 1.81863800  |
| C | -3.08906700 | 1.06934200  | 2.42526500  |
| H | -3.46172000 | 0.97714200  | 3.45369200  |
| H | -3.00438600 | 2.13676200  | 2.20358800  |
| H | -3.84731700 | 0.64713300  | 1.75755600  |
| C | -2.69905100 | -2.07055800 | 2.28696400  |
| H | -2.88512900 | -2.32974300 | 3.33751100  |
| H | -3.63719600 | -1.69593700 | 1.86762300  |
| H | -2.44066600 | -2.99055000 | 1.75769400  |
| C | 0.39799500  | -2.68503300 | 1.83336100  |
| H | 0.52648600  | -3.18684600 | 2.80166500  |
| H | -0.24200000 | -3.31894000 | 1.21204900  |
| H | 1.37521800  | -2.63529000 | 1.34735800  |
| C | 5.56989900  | -1.94716600 | 1.34327400  |
| H | 6.52532800  | -1.74652200 | 1.83834700  |
| H | 4.76148100  | -1.64450800 | 2.01409900  |
| H | 5.47925900  | -3.02416800 | 1.18061600  |
| C | 6.66153400  | -1.60578800 | -0.91381000 |
| H | 6.63526900  | -2.68292500 | -1.10903300 |
| H | 6.61323600  | -1.08061200 | -1.87099900 |
| H | 7.61893800  | -1.37207700 | -0.43671300 |
| C | 5.56815700  | 0.34206700  | 0.27017800  |
| H | 4.72744600  | 0.67656200  | 0.88613400  |
| H | 6.49510200  | 0.58423900  | 0.80021500  |
| H | 5.55150700  | 0.90128800  | -0.66865100 |
| C | -3.97685200 | -3.89260600 | -0.87857300 |
| H | -4.27368600 | -3.78365600 | 0.16972200  |
| H | -4.68766300 | -4.57056300 | -1.36342300 |
| H | -2.98270800 | -4.34470800 | -0.90674900 |
| C | -5.35997700 | -1.87271300 | -1.51189800 |
| H | -6.10905900 | -2.51600600 | -1.98634600 |
| H | -5.65367100 | -1.71099400 | -0.47051100 |
| H | -5.36642900 | -0.90105100 | -2.01234700 |
| C | -3.56083700 | -2.72186300 | -3.07378000 |



|    |             |             |             |
|----|-------------|-------------|-------------|
| H  | -3.54246200 | -1.76378900 | -3.60484400 |
| H  | -2.56650700 | -3.17124800 | -3.13872800 |
| H  | -4.27716100 | -3.37734400 | -3.58105900 |
| Fe | -1.04653800 | -0.24496900 | 0.02047700  |

<sup>22</sup>Ni, -2686.60877362

|   |             |             |             |
|---|-------------|-------------|-------------|
| C | 0.64983500  | 2.32210900  | -1.17218800 |
| C | -0.61678200 | 2.35275900  | -0.59569100 |
| C | -0.45315300 | 2.31608100  | 0.89457500  |
| C | 1.61371000  | 2.19803000  | -0.08170600 |
| C | 0.90857500  | 2.29098500  | 1.18998900  |
| C | 3.09245700  | 2.13473000  | -0.24450100 |
| H | 3.36366600  | 1.64688100  | -1.18275100 |
| H | 3.50943400  | 3.15056100  | -0.25828400 |
| H | 3.55417500  | 1.59277200  | 0.58314600  |
| C | 1.57838000  | 2.23243000  | 2.52753000  |
| H | 2.19085400  | 1.32857600  | 2.60420400  |
| H | 2.23434500  | 3.09787900  | 2.66893500  |
| H | 0.85199200  | 2.22656400  | 3.34211100  |
| C | -1.60971900 | 2.37243000  | 1.83642500  |
| H | -1.31291700 | 2.14424300  | 2.86104500  |
| H | -2.05495000 | 3.37480800  | 1.82681400  |
| H | -2.39278300 | 1.66862600  | 1.53862200  |
| C | -1.94319500 | 2.51601000  | -1.26118400 |
| H | -2.65340800 | 1.75094700  | -0.93498500 |
| H | -2.37255000 | 3.49031100  | -0.99811800 |
| H | -1.86397200 | 2.46464100  | -2.34772000 |
| C | 1.02803700  | 2.31369900  | -2.62045900 |
| H | 1.70793100  | 3.14172400  | -2.84647900 |
| H | 1.54181800  | 1.37964700  | -2.87183900 |
| H | 0.15485400  | 2.40917900  | -3.26781500 |
| C | 3.34894400  | -2.18256700 | -0.16548700 |
| C | 2.84964600  | -3.42942500 | 0.60064700  |
| H | 1.95942100  | -3.85449800 | 0.12496800  |
| H | 3.63039700  | -4.19586000 | 0.60003700  |
| H | 2.60668100  | -3.18111700 | 1.63696700  |
| C | 3.67672700  | -2.54062100 | -1.62226700 |
| H | 2.80262300  | -2.94777700 | -2.13687600 |
| H | 4.01590000  | -1.66329800 | -2.18030400 |
| H | 4.47254000  | -3.29089300 | -1.64592600 |
| C | 4.58837200  | -1.59392400 | 0.54330700  |
| H | 4.95466500  | -0.70149200 | 0.02402800  |
| H | 4.35895700  | -1.32564400 | 1.57753200  |
| H | 5.39489400  | -2.33296600 | 0.54598500  |

|    |             |             |             |
|----|-------------|-------------|-------------|
| C  | 2.23882100  | -1.14463500 | -0.10660900 |
| O  | 1.86308700  | -0.65719400 | 1.01687500  |
| O  | 1.63780400  | -0.72624600 | -1.15041800 |
| C  | -3.67778700 | -1.07713200 | -2.04475800 |
| C  | -2.41941500 | -0.92366100 | -1.48452200 |
| C  | -2.31357700 | -0.96896900 | -0.05854200 |
| C  | -3.47963600 | -1.27898000 | 0.72274800  |
| C  | -4.74200400 | -1.41707200 | 0.09067000  |
| C  | -4.84061200 | -1.29609700 | -1.27373600 |
| H  | -3.76796300 | -1.05279400 | -3.12695000 |
| C  | -3.33409800 | -1.47528900 | 2.11716900  |
| H  | -5.61271700 | -1.63858000 | 0.70026600  |
| H  | -5.79980600 | -1.40442300 | -1.76927800 |
| C  | -2.09149600 | -1.37700500 | 2.69813300  |
| C  | -1.00775400 | -0.99072200 | 1.89285200  |
| H  | -4.21046700 | -1.72192000 | 2.71002200  |
| H  | -1.93447500 | -1.55709600 | 3.75532900  |
| H  | -0.02426000 | -0.84895600 | 2.32720600  |
| N  | -1.10614000 | -0.75511600 | 0.58219500  |
| C  | -1.21661500 | -0.79203800 | -2.38099800 |
| H  | -0.81159000 | 0.22304700  | -2.39029100 |
| H  | -0.40211900 | -1.44573000 | -2.06501600 |
| H  | -1.48405500 | -1.04240500 | -3.40982400 |
| Ni | 0.43438500  | 0.43220100  | 0.03535200  |

<sup>42</sup>Ni, -2686.58858943

|   |             |            |             |
|---|-------------|------------|-------------|
| C | 0.88867700  | 2.53130300 | -0.79526500 |
| C | -0.47821200 | 2.56239600 | -0.24024900 |
| C | -0.41616200 | 2.20531500 | 1.13767000  |
| C | 1.75935100  | 2.25489300 | 0.25883400  |
| C | 0.95255600  | 2.06983400 | 1.48108200  |
| C | 3.24879400  | 2.16328400 | 0.23527500  |
| H | 3.63895500  | 2.14929500 | -0.78380700 |
| H | 3.69671200  | 3.01939900 | 0.75468500  |
| H | 3.58303700  | 1.25697600 | 0.74803900  |
| C | 1.53765700  | 1.74296200 | 2.80779500  |
| H | 2.08545700  | 0.79497900 | 2.74424500  |
| H | 2.26122800  | 2.51009800 | 3.10883400  |
| H | 0.77907300  | 1.66438400 | 3.58810700  |
| C | -1.59873900 | 2.10170300 | 2.05516000  |
| H | -1.37412800 | 1.49091200 | 2.93211600  |
| H | -1.91646000 | 3.08927500 | 2.40899800  |
| H | -2.45247000 | 1.64544800 | 1.54518800  |
| C | -1.71580900 | 2.96482300 | -0.97121300 |

|    |             |             |             |
|----|-------------|-------------|-------------|
| H  | -2.53071400 | 2.25136700  | -0.80461900 |
| H  | -2.06732800 | 3.93720500  | -0.60280100 |
| H  | -1.54934400 | 3.05667300  | -2.04585100 |
| C  | 1.24165800  | 2.87007100  | -2.21201500 |
| H  | 1.19372000  | 3.95330300  | -2.37595200 |
| H  | 2.25104600  | 2.53730200  | -2.45949700 |
| H  | 0.55688500  | 2.40206000  | -2.92553200 |
| C  | 3.36004600  | -2.21352900 | -0.37511600 |
| C  | 2.88710400  | -3.48109000 | 0.37568300  |
| H  | 2.00719000  | -3.92032800 | -0.10619900 |
| H  | 3.68490000  | -4.22963900 | 0.36675200  |
| H  | 2.63872300  | -3.25116300 | 1.41519500  |
| C  | 3.69812500  | -2.54794700 | -1.83526700 |
| H  | 2.83418400  | -2.96839900 | -2.35605000 |
| H  | 4.01873600  | -1.65714200 | -2.38260800 |
| H  | 4.51034600  | -3.28023000 | -1.86506400 |
| C  | 4.58515800  | -1.60870600 | 0.34405000  |
| H  | 4.94050700  | -0.70883700 | -0.16917300 |
| H  | 4.34559500  | -1.34955800 | 1.37855800  |
| H  | 5.40299300  | -2.33512700 | 0.34946700  |
| C  | 2.22201200  | -1.20922000 | -0.30673200 |
| O  | 1.84358900  | -0.72526000 | 0.81841500  |
| O  | 1.58813200  | -0.82266700 | -1.34662600 |
| C  | -3.86184200 | -0.61388200 | -2.04051100 |
| C  | -2.58547600 | -0.57920600 | -1.50791000 |
| C  | -2.41661600 | -0.94368000 | -0.13707000 |
| C  | -3.54402900 | -1.40049400 | 0.61987300  |
| C  | -4.83117800 | -1.41662100 | 0.02168000  |
| C  | -4.98686800 | -1.01568000 | -1.28310300 |
| H  | -4.00214600 | -0.34326300 | -3.08309000 |
| C  | -3.32967900 | -1.83910200 | 1.94920600  |
| H  | -5.67899900 | -1.75689500 | 0.60841300  |
| H  | -5.96723700 | -1.02522600 | -1.74783400 |
| C  | -2.06091300 | -1.82136200 | 2.48215000  |
| C  | -1.00931200 | -1.31251800 | 1.70006400  |
| H  | -4.17459000 | -2.19599300 | 2.53140800  |
| H  | -1.85839600 | -2.17004000 | 3.48829500  |
| H  | 0.00006400  | -1.24798700 | 2.09184000  |
| N  | -1.17291000 | -0.87240300 | 0.45331400  |
| C  | -1.40216700 | -0.23876600 | -2.37412100 |
| H  | -0.87074900 | 0.66235300  | -2.02760800 |
| H  | -0.67293200 | -1.05212800 | -2.41327400 |
| H  | -1.71488100 | -0.00840100 | -3.39506700 |
| Ni | 0.36760000  | 0.29360300  | -0.20726200 |

<sup>2</sup>TS4\_Ni, -3033.27296855, i1595.57

|   |             |             |             |
|---|-------------|-------------|-------------|
| C | -0.15490300 | 0.41674900  | 2.29606900  |
| C | -0.46924800 | -0.98370600 | 2.29041800  |
| C | -1.88334500 | -1.10908900 | 2.31572800  |
| C | -2.46067300 | 0.22325100  | 2.37390000  |
| C | -1.40317700 | 1.15595700  | 2.34124400  |
| C | 2.44207000  | 3.69582600  | -1.06634600 |
| C | 1.26746300  | 4.37748200  | -1.28732300 |
| C | 0.03234000  | 3.67988200  | -1.25912700 |
| C | 0.02153500  | 2.27167000  | -0.99509300 |
| C | 1.25821600  | 1.55677200  | -0.85485300 |
| C | 2.43404200  | 2.29772300  | -0.86560000 |
| H | -1.21934200 | 5.39313000  | -1.68858400 |
| H | 3.39046400  | 4.22458700  | -1.07739300 |
| H | 1.26499200  | 5.44589000  | -1.48410900 |
| C | -1.20905300 | 4.32785700  | -1.47265700 |
| H | 3.37533400  | 1.76766000  | -0.76808000 |
| C | -2.31085100 | 2.24472400  | -1.04957700 |
| C | -2.37908800 | 3.60763200  | -1.40145300 |
| H | -3.20890700 | 1.65060200  | -0.91330700 |
| H | -3.34536100 | 4.06960700  | -1.57180900 |
| N | -1.16737500 | 1.60471300  | -0.83400100 |
| C | 1.28643100  | 0.08227600  | -0.74357600 |
| H | 1.39086400  | -0.32451000 | 0.25810600  |
| H | 0.55235300  | -0.45442900 | -1.34083000 |
| H | 2.49064200  | -0.33642800 | -1.09045500 |
| C | 4.20488100  | -1.02271000 | -0.08127400 |
| C | 5.68339200  | -1.47587900 | -0.19525400 |
| O | 3.69752000  | -0.67634600 | -1.24413500 |
| O | 3.61433200  | -0.99472400 | 0.99697100  |
| C | -2.52428700 | -1.58762800 | -1.13160400 |
| C | -3.22341100 | -2.56524800 | -2.07813700 |
| O | -1.28715500 | -1.72979400 | -0.88496300 |
| O | -3.16676400 | -0.63687500 | -0.57198900 |
| C | 1.19198500  | 1.04920700  | 2.47230000  |
| H | 1.30086300  | 1.94124300  | 1.84749200  |
| H | 1.31531800  | 1.37302000  | 3.51502000  |
| H | 2.01324700  | 0.37312700  | 2.22830200  |
| C | -1.49377600 | 2.65244900  | 2.38293800  |
| H | -1.22788400 | 3.04196500  | 3.37375000  |
| H | -0.80808500 | 3.10979400  | 1.66207100  |
| H | -2.50187700 | 3.00288300  | 2.14790600  |
| C | -3.93360800 | 0.49739700  | 2.39596900  |

|    |             |             |             |
|----|-------------|-------------|-------------|
| H  | -4.38878500 | 0.13049200  | 3.32395200  |
| H  | -4.14740400 | 1.56645600  | 2.32073600  |
| H  | -4.42665900 | -0.00807300 | 1.55898200  |
| C  | -2.67349200 | -2.38217000 | 2.29525300  |
| H  | -3.05578300 | -2.63751800 | 3.29205300  |
| H  | -3.53350900 | -2.29105700 | 1.62411900  |
| H  | -2.06236300 | -3.21804600 | 1.94695500  |
| C  | 0.50501900  | -2.12496000 | 2.22581900  |
| H  | 0.52259200  | -2.67922500 | 3.17218200  |
| H  | 0.21781400  | -2.82653800 | 1.43550700  |
| H  | 1.52207200  | -1.78961400 | 2.01166100  |
| C  | 6.20154500  | -1.86709300 | 1.19476200  |
| H  | 7.24722400  | -2.18793000 | 1.12742500  |
| H  | 6.13683300  | -1.02495900 | 1.88878900  |
| H  | 5.61067000  | -2.68425300 | 1.61672700  |
| C  | 5.75605500  | -2.67997800 | -1.15564100 |
| H  | 5.16772100  | -3.52181900 | -0.77455600 |
| H  | 5.37077300  | -2.41363300 | -2.14275600 |
| H  | 6.79432200  | -3.01459200 | -1.26121700 |
| C  | 6.50718100  | -0.30295400 | -0.76511800 |
| H  | 6.45939400  | 0.56877600  | -0.10237700 |
| H  | 7.55946900  | -0.59318000 | -0.86189900 |
| H  | 6.13378700  | -0.00788400 | -1.74887900 |
| C  | -3.08361700 | -3.97807400 | -1.47122500 |
| H  | -3.58410500 | -4.03920000 | -0.49853500 |
| H  | -3.54198800 | -4.71885700 | -2.13530000 |
| H  | -2.03060200 | -4.23407900 | -1.33106800 |
| C  | -4.70451100 | -2.19936100 | -2.24600500 |
| H  | -5.19167400 | -2.91120900 | -2.92125400 |
| H  | -5.22594200 | -2.21958100 | -1.28506100 |
| H  | -4.81702900 | -1.19442500 | -2.66245300 |
| C  | -2.49422700 | -2.50938700 | -3.43685000 |
| H  | -2.57583400 | -1.51316300 | -3.88563700 |
| H  | -1.43412100 | -2.74392000 | -3.31462500 |
| H  | -2.93827000 | -3.23067500 | -4.13149800 |
| Ni | -1.41458500 | -0.06654300 | 0.42659800  |

<sup>4</sup>TS4\_Ni, -3033.28456825, i1172.43

|   |             |             |             |
|---|-------------|-------------|-------------|
| C | 0.01139200  | 0.34782200  | 2.34838900  |
| C | -0.38466800 | -1.04280000 | 2.26596200  |
| C | -1.80048700 | -1.09005000 | 2.28058000  |
| C | -2.29684000 | 0.26875300  | 2.36457400  |
| C | -1.18057400 | 1.14483600  | 2.36639200  |
| C | 2.42434600  | 3.70130500  | -1.05383300 |

|   |             |             |             |
|---|-------------|-------------|-------------|
| C | 1.25585800  | 4.40149000  | -1.24982800 |
| C | 0.01241400  | 3.71956900  | -1.21010100 |
| C | -0.00316300 | 2.31152900  | -0.95577700 |
| C | 1.21876100  | 1.57981500  | -0.82765700 |
| C | 2.40470700  | 2.30091400  | -0.85943900 |
| H | -1.23969900 | 5.44161200  | -1.60360400 |
| H | 3.37883000  | 4.21877400  | -1.07553100 |
| H | 1.26497800  | 5.47245200  | -1.43169400 |
| C | -1.22986500 | 4.37501600  | -1.39450400 |
| H | 3.34012700  | 1.75781200  | -0.77805100 |
| C | -2.33898400 | 2.29094900  | -0.97720900 |
| C | -2.40275600 | 3.66053100  | -1.30464000 |
| H | -3.23523100 | 1.69554800  | -0.83798700 |
| H | -3.36913100 | 4.13096200  | -1.44899200 |
| N | -1.19358100 | 1.64563000  | -0.79438900 |
| C | 1.21808600  | 0.09706900  | -0.71805900 |
| H | 1.33601200  | -0.33138300 | 0.27339000  |
| H | 0.50844100  | -0.43128700 | -1.35231800 |
| H | 2.38839100  | -0.32212500 | -1.07526400 |
| C | 4.15059800  | -1.10296200 | -0.17049500 |
| C | 5.63831000  | -1.51617400 | -0.32095400 |
| O | 3.63622300  | -0.64723500 | -1.28491200 |
| O | 3.56008100  | -1.20301900 | 0.90718800  |
| C | -2.63183800 | -1.55420300 | -1.08828400 |
| C | -3.42880600 | -2.52149300 | -1.96288100 |
| O | -1.37973300 | -1.72957200 | -0.93923400 |
| O | -3.19325000 | -0.57843000 | -0.49128900 |
| C | 1.39777200  | 0.88000100  | 2.53746800  |
| H | 1.55746700  | 1.79201300  | 1.95278100  |
| H | 1.55730700  | 1.14470000  | 3.59198800  |
| H | 2.16809700  | 0.16282200  | 2.24782200  |
| C | -1.20769500 | 2.64398600  | 2.43118200  |
| H | -1.07337000 | 3.00758600  | 3.45775600  |
| H | -0.40678900 | 3.07931300  | 1.82558900  |
| H | -2.15413100 | 3.04613200  | 2.05988000  |
| C | -3.74700100 | 0.63928900  | 2.40729900  |
| H | -4.20386900 | 0.32898000  | 3.35548300  |
| H | -3.89163300 | 1.71814900  | 2.30903600  |
| H | -4.29271100 | 0.14562600  | 1.59707500  |
| C | -2.65957500 | -2.31871700 | 2.25781600  |
| H | -2.97301900 | -2.61079900 | 3.26841300  |
| H | -3.56263600 | -2.14848900 | 1.66467900  |
| H | -2.12473900 | -3.16435000 | 1.81850800  |
| C | 0.53367000  | -2.22878700 | 2.22030500  |

|    |             |             |             |
|----|-------------|-------------|-------------|
| H  | 0.62163900  | -2.69300800 | 3.21123400  |
| H  | 0.14467200  | -2.98856800 | 1.53525500  |
| H  | 1.53784600  | -1.96334700 | 1.88258700  |
| C  | 6.16328200  | -2.03360900 | 1.02436800  |
| H  | 7.21440600  | -2.32919700 | 0.92898500  |
| H  | 6.08376300  | -1.26491000 | 1.79770000  |
| H  | 5.58537300  | -2.89749600 | 1.36301100  |
| C  | 5.73404300  | -2.61753600 | -1.39564700 |
| H  | 5.16356100  | -3.50473300 | -1.09953500 |
| H  | 5.33973500  | -2.26179300 | -2.35058000 |
| H  | 6.77843500  | -2.91942300 | -1.53564100 |
| C  | 6.44152200  | -0.27888600 | -0.77077300 |
| H  | 6.37797900  | 0.52245300  | -0.02542600 |
| H  | 7.49921200  | -0.53811300 | -0.89475100 |
| H  | 6.06134500  | 0.10465200  | -1.72091100 |
| C  | -3.26130700 | -3.93637400 | -1.36780500 |
| H  | -3.67453000 | -3.98834300 | -0.35469500 |
| H  | -3.79040000 | -4.66789500 | -1.98791800 |
| H  | -2.20508500 | -4.21242400 | -1.32146600 |
| C  | -4.91156200 | -2.12643900 | -1.99724700 |
| H  | -5.47104600 | -2.82971700 | -2.62335400 |
| H  | -5.34480200 | -2.13549900 | -0.99320700 |
| H  | -5.04192700 | -1.12021000 | -2.40515100 |
| C  | -2.82361600 | -2.48012500 | -3.38219000 |
| H  | -2.92650300 | -1.48305000 | -3.82458200 |
| H  | -1.76158600 | -2.73558600 | -3.35612700 |
| H  | -3.34255600 | -3.19341400 | -4.03153800 |
| Ni | -1.29392400 | -0.08486100 | 0.32256400  |

<sup>25</sup>Ni, -3033.33700448

|   |             |             |             |
|---|-------------|-------------|-------------|
| C | 0.50586700  | -0.48829200 | 1.98664500  |
| C | -0.18297600 | -1.75653600 | 1.75634300  |
| C | -1.53986700 | -1.55640100 | 2.07279100  |
| C | -1.71599700 | -0.18038800 | 2.48695400  |
| C | -0.44863300 | 0.45669800  | 2.48023100  |
| C | 2.36353800  | 3.43920600  | -1.14348300 |
| C | 1.30328500  | 4.29469200  | -0.93362900 |
| C | 0.01500600  | 3.76325400  | -0.65536300 |
| C | -0.13262900 | 2.35028600  | -0.60581700 |
| C | 0.94937500  | 1.46462300  | -0.89678500 |
| C | 2.19218700  | 2.03080400  | -1.13105900 |
| H | -1.07481800 | 5.62441500  | -0.41876800 |
| H | 3.35167400  | 3.84553100  | -1.34075800 |
| H | 1.43965800  | 5.37212500  | -0.96188200 |

|   |             |             |             |
|---|-------------|-------------|-------------|
| C | -1.14080600 | 4.53991900  | -0.38334100 |
| H | 3.03857100  | 1.38841100  | -1.34901600 |
| C | -2.37010000 | 2.50187900  | 0.01405700  |
| C | -2.32901500 | 3.91387100  | -0.07243000 |
| H | -3.26538200 | 1.94875900  | 0.28111600  |
| H | -3.22897200 | 4.48444900  | 0.13118800  |
| N | -1.30341300 | 1.75845600  | -0.22641500 |
| C | 0.62324100  | 0.01469000  | -0.92504900 |
| H | 1.47400300  | -0.64430300 | -0.75928800 |
| H | 0.06087200  | -0.27681200 | -1.81679900 |
| H | 3.07768500  | -1.02429700 | -2.43930200 |
| C | 4.18790500  | -1.46420600 | -0.98262500 |
| C | 5.52472400  | -1.10753600 | -0.33609800 |
| O | 3.95622200  | -0.75800600 | -2.11739100 |
| O | 3.38732000  | -2.27309400 | -0.55889100 |
| C | -3.29810100 | -0.89014000 | -0.92325000 |
| C | -4.08049000 | -1.66852200 | -2.01057200 |
| O | -2.02243200 | -1.09627500 | -0.95001400 |
| O | -3.89681600 | -0.15838400 | -0.11628700 |
| C | 1.98909000  | -0.27744600 | 1.94790800  |
| H | 2.24487300  | 0.69043200  | 1.50430100  |
| H | 2.39953600  | -0.29241300 | 2.96573200  |
| H | 2.48823900  | -1.05781100 | 1.37268500  |
| C | -0.14564500 | 1.87868100  | 2.85174700  |
| H | 0.12744500  | 1.97184400  | 3.91048800  |
| H | 0.68760300  | 2.27131200  | 2.26144600  |
| H | -1.00533000 | 2.53089300  | 2.67478300  |
| C | -3.02083300 | 0.42407700  | 2.90638500  |
| H | -3.31446400 | 0.07005700  | 3.90297600  |
| H | -2.95789500 | 1.51474200  | 2.95138000  |
| H | -3.80569700 | 0.15922600  | 2.19511400  |
| C | -2.65283600 | -2.55178300 | 1.95134200  |
| H | -2.90408500 | -2.98440900 | 2.92828100  |
| H | -3.55019400 | -2.07325300 | 1.55205000  |
| H | -2.38192900 | -3.37058700 | 1.28132400  |
| C | 0.46732300  | -3.03041900 | 1.30349700  |
| H | 0.85222600  | -3.60758200 | 2.15462300  |
| H | -0.24705000 | -3.66343700 | 0.77057500  |
| H | 1.30546300  | -2.83819800 | 0.63012900  |
| C | 5.68294200  | -1.92137300 | 0.95607600  |
| H | 6.65122300  | -1.69955800 | 1.41555900  |
| H | 4.89539300  | -1.67877000 | 1.67453700  |
| H | 5.62857600  | -2.99415700 | 0.75468900  |
| C | 6.65836100  | -1.44522600 | -1.32968300 |



|    |             |             |             |
|----|-------------|-------------|-------------|
| H  | 6.67029700  | -2.51428600 | -1.56591700 |
| H  | 6.54573000  | -0.88681000 | -2.26230000 |
| H  | 7.62443600  | -1.18689500 | -0.88411100 |
| C  | 5.53628600  | 0.40515000  | -0.02246000 |
| H  | 4.70430400  | 0.68121800  | 0.63345100  |
| H  | 6.47009100  | 0.66440500  | 0.48667500  |
| H  | 5.46667200  | 0.99981000  | -0.93675400 |
| C  | -3.82411200 | -3.17522600 | -1.80421100 |
| H  | -4.18399600 | -3.50268900 | -0.82212300 |
| H  | -4.34957100 | -3.76130300 | -2.56745600 |
| H  | -2.75524800 | -3.39432500 | -1.86548000 |
| C  | -5.58085900 | -1.36740500 | -1.90122200 |
| H  | -6.13650800 | -1.92010400 | -2.66795900 |
| H  | -5.96505100 | -1.65121500 | -0.91771700 |
| H  | -5.77542200 | -0.29918900 | -2.02998000 |
| C  | -3.54953000 | -1.23909000 | -3.39266900 |
| H  | -3.71219300 | -0.16782700 | -3.55885000 |
| H  | -2.47761600 | -1.43729700 | -3.47010200 |
| H  | -4.06802600 | -1.78554500 | -4.18942400 |
| Ni | -0.86556300 | -0.20266900 | 0.36896600  |

<sup>45</sup>Ni, -3033.3037136

|   |             |             |             |
|---|-------------|-------------|-------------|
| C | 0.75456200  | -0.59153100 | 1.99517600  |
| C | 0.01750100  | -1.80501100 | 1.80091400  |
| C | -1.34779700 | -1.53650300 | 2.08029900  |
| C | -1.47637400 | -0.13339800 | 2.40142200  |
| C | -0.17648400 | 0.44496400  | 2.34221200  |
| C | 2.31121500  | 3.70169300  | -0.79375200 |
| C | 1.18396300  | 4.48928100  | -0.68191500 |
| C | -0.09322800 | 3.87502000  | -0.57597000 |
| C | -0.16850200 | 2.45507800  | -0.60582200 |
| C | 0.99391300  | 1.64106200  | -0.82041000 |
| C | 2.22373200  | 2.29078000  | -0.86653400 |
| H | -1.29604100 | 5.66768700  | -0.37407800 |
| H | 3.28976000  | 4.17009100  | -0.85329700 |
| H | 1.25755200  | 5.57254400  | -0.65188400 |
| C | -1.30897400 | 4.58071600  | -0.38753500 |
| H | 3.12645000  | 1.70476400  | -1.00917200 |
| C | -2.45838200 | 2.47376600  | -0.16772100 |
| C | -2.48640900 | 3.88626100  | -0.20789100 |
| H | -3.34017400 | 1.86986300  | 0.03000700  |
| H | -3.42896100 | 4.40289900  | -0.06160600 |
| N | -1.33513600 | 1.79357700  | -0.34913400 |
| C | 0.78080600  | 0.19963600  | -0.92403900 |

|   |             |             |             |
|---|-------------|-------------|-------------|
| H | 1.64162600  | -0.44376300 | -0.78391300 |
| H | 0.15242000  | -0.11241900 | -1.76764700 |
| H | 3.08522700  | -0.52305200 | -2.37945200 |
| C | 4.22269200  | -1.36532200 | -1.13181900 |
| C | 5.61240400  | -1.25218400 | -0.50853000 |
| O | 4.00246400  | -0.41391400 | -2.07300500 |
| O | 3.37651000  | -2.18577800 | -0.83766300 |
| C | -3.59113100 | -0.92457600 | -0.78075300 |
| C | -4.35590500 | -1.79701000 | -1.80275600 |
| O | -2.30871200 | -1.12385000 | -0.77580500 |
| O | -4.19144000 | -0.13226500 | -0.04101200 |
| C | 2.23715000  | -0.42089600 | 1.90642500  |
| H | 2.49897700  | 0.51488500  | 1.39999000  |
| H | 2.68764100  | -0.38168000 | 2.90761500  |
| H | 2.70254900  | -1.24349900 | 1.36105800  |
| C | 0.18814700  | 1.86636200  | 2.64912900  |
| H | 0.48185200  | 1.98346000  | 3.70046100  |
| H | 1.02658800  | 2.20509400  | 2.03388400  |
| H | -0.64987400 | 2.54346800  | 2.46458900  |
| C | -2.74626400 | 0.54636600  | 2.82245900  |
| H | -3.02775900 | 0.25388400  | 3.84222700  |
| H | -2.63433700 | 1.63391600  | 2.81197600  |
| H | -3.56458800 | 0.28844000  | 2.14581600  |
| C | -2.48378300 | -2.51309500 | 2.04875000  |
| H | -2.62143400 | -2.99007800 | 3.02811900  |
| H | -3.41757700 | -2.01231900 | 1.78329100  |
| H | -2.31051600 | -3.30292100 | 1.31385200  |
| C | 0.60519500  | -3.11926900 | 1.37590600  |
| H | 1.01313700  | -3.67369900 | 2.23147000  |
| H | -0.15101500 | -3.75484600 | 0.90710600  |
| H | 1.41810700  | -2.98069900 | 0.65673100  |
| C | 5.76876400  | -2.34472300 | 0.55843100  |
| H | 6.76975400  | -2.29145000 | 0.99791400  |
| H | 5.03284300  | -2.22407600 | 1.35794200  |
| H | 5.62864300  | -3.33909500 | 0.12693800  |
| C | 6.67007400  | -1.42717200 | -1.62047400 |
| H | 6.58881800  | -2.41277500 | -2.09047300 |
| H | 6.55820900  | -0.66511900 | -2.39568100 |
| H | 7.67263400  | -1.34020600 | -1.18925500 |
| C | 5.75126500  | 0.14755500  | 0.13109800  |
| H | 4.98595300  | 0.31053200  | 0.89674600  |
| H | 6.73221800  | 0.23494000  | 0.60928800  |
| H | 5.66205800  | 0.93637700  | -0.62004100 |
| C | -4.08663300 | -3.27945800 | -1.47242100 |

|    |             |             |             |
|----|-------------|-------------|-------------|
| H  | -4.44951400 | -3.52978900 | -0.46921100 |
| H  | -4.60278500 | -3.92887800 | -2.18892700 |
| H  | -3.01585300 | -3.49459800 | -1.51146800 |
| C  | -5.85953700 | -1.50164800 | -1.72723900 |
| H  | -6.40407800 | -2.12014700 | -2.45005600 |
| H  | -6.24810800 | -1.70838400 | -0.72647800 |
| H  | -6.06275700 | -0.44948400 | -1.94423200 |
| C  | -3.81801100 | -1.47597500 | -3.21199000 |
| H  | -3.98827000 | -0.42350800 | -3.46632800 |
| H  | -2.74426600 | -1.67202400 | -3.26866000 |
| H  | -4.32764800 | -2.09028300 | -3.96335900 |
| Ni | -0.94985300 | -0.19847300 | 0.24550400  |

<sup>1</sup>I\_Tp, -2432.01762965

|    |             |             |             |
|----|-------------|-------------|-------------|
| Co | -0.10092500 | 0.00044900  | -0.45474000 |
| C  | -3.88631400 | 0.00014500  | -0.19164000 |
| C  | -4.46268600 | 1.27312700  | -0.83727400 |
| H  | -4.26099300 | 1.29729500  | -1.91239900 |
| H  | -5.54676900 | 1.28786900  | -0.69625200 |
| H  | -4.04263600 | 2.17567600  | -0.38737600 |
| C  | -4.46273200 | -1.27185500 | -0.83909600 |
| H  | -4.26127800 | -1.29435900 | -1.91430300 |
| H  | -4.04254300 | -2.17508300 | -0.39068600 |
| H  | -5.54678900 | -1.28690000 | -0.69789000 |
| C  | -4.17038800 | -0.00091700 | 1.33680200  |
| H  | -3.75960800 | -0.89508500 | 1.81628400  |
| H  | -3.75929100 | 0.89238700  | 1.81759400  |
| H  | -5.25274700 | -0.00088400 | 1.49319100  |
| C  | -2.38691700 | 0.00025200  | -0.31260100 |
| O  | -1.68049400 | 1.07840500  | -0.33287800 |
| O  | -1.68040700 | -1.07781600 | -0.33521700 |
| H  | 3.87295500  | -0.00045500 | 0.91546400  |
| N  | 1.69946900  | -0.00098700 | 1.64693900  |
| C  | 1.81393000  | -0.00313700 | 2.98939500  |
| C  | 0.54106300  | -0.00403600 | 3.55145000  |
| C  | -0.34122900 | -0.00252200 | 2.46741100  |
| N  | 2.43236700  | -1.24246200 | -0.36413600 |
| C  | 3.11079800  | -2.36409200 | -0.67384400 |
| C  | 1.02609900  | -2.56729100 | -1.39659300 |
| C  | 2.25345000  | -3.23309000 | -1.34459200 |
| N  | 2.43236500  | 1.24325500  | -0.36248300 |
| C  | 3.11054800  | 2.36564100  | -0.66996300 |
| C  | 2.25315000  | 3.23559000  | -1.33942300 |
| C  | 1.02596200  | 2.56961400  | -1.39278900 |

|   |             |             |             |
|---|-------------|-------------|-------------|
| N | 1.15840000  | 1.36349800  | -0.81420100 |
| N | 1.15833100  | -1.36225100 | -0.81573200 |
| N | 0.37633700  | -0.00058000 | 1.33548600  |
| H | 2.48540200  | 4.21415600  | -1.72990900 |
| H | 2.48583000  | -4.21094500 | -1.73677900 |
| H | 0.28516600  | -0.00548700 | 4.59957500  |
| B | 2.75771400  | -0.00017500 | 0.49736600  |
| H | 2.79075100  | -0.00366700 | 3.45009600  |
| H | -1.41929500 | -0.00251300 | 2.43816600  |
| H | 4.14928500  | 2.47086300  | -0.39298400 |
| H | 0.07357000  | 2.87730100  | -1.79948900 |
| H | 4.14961500  | -2.46955200 | -0.39725700 |
| H | 0.07371400  | -2.87444800 | -1.80370600 |

<sup>31</sup>Tp, -2432.01013251

|    |             |             |             |
|----|-------------|-------------|-------------|
| Co | -0.18256900 | 0.00045800  | -0.39054900 |
| C  | -3.97690600 | 0.00011900  | -0.07137600 |
| C  | -4.58517600 | 1.27336300  | -0.68835900 |
| H  | -4.44276500 | 1.29552300  | -1.77285800 |
| H  | -5.65970100 | 1.28796700  | -0.48744100 |
| H  | -4.14235400 | 2.17674700  | -0.26237900 |
| C  | -4.58474800 | -1.27423700 | -0.68641200 |
| H  | -4.44246000 | -1.29794900 | -1.77089400 |
| H  | -4.14157200 | -2.17682900 | -0.25914400 |
| H  | -5.65925800 | -1.28890900 | -0.48539900 |
| C  | -4.17732600 | 0.00128300  | 1.47156000  |
| H  | -3.73874700 | -0.89084800 | 1.92880600  |
| H  | -3.73898000 | 0.89422400  | 1.92743600  |
| H  | -5.25003700 | 0.00129500  | 1.68360100  |
| C  | -2.49136100 | 0.00032900  | -0.27128100 |
| O  | -1.77670100 | 1.07538500  | -0.32608500 |
| O  | -1.77650000 | -1.07465900 | -0.32647500 |
| H  | 3.95715700  | -0.00072200 | 0.56920700  |
| N  | 1.92240800  | -0.00014700 | 1.60397300  |
| C  | 2.27203900  | -0.00025600 | 2.90397800  |
| C  | 1.11428700  | -0.00018300 | 3.68064800  |
| C  | 0.06664800  | -0.00018900 | 2.75865600  |
| N  | 2.37741200  | -1.24037700 | -0.51787500 |
| C  | 3.03338400  | -2.36259400 | -0.86719600 |
| C  | 0.91000900  | -2.56806600 | -1.46297400 |
| C  | 2.13695100  | -3.23423800 | -1.48209500 |
| N  | 2.37808800  | 1.23945100  | -0.51817700 |
| C  | 3.03473000  | 2.36135500  | -0.86723100 |
| C  | 2.13880800  | 3.23379900  | -1.48174200 |

|   |             |             |             |
|---|-------------|-------------|-------------|
| C | 0.91142900  | 2.56844400  | -1.46263200 |
| N | 1.07681400  | 1.36470500  | -0.88633600 |
| N | 1.07616100  | -1.36463700 | -0.88625400 |
| N | 0.55974100  | -0.00012100 | 1.50797700  |
| H | 2.34766100  | 4.21230100  | -1.88549200 |
| H | 2.34524900  | -4.21272300 | -1.88617500 |
| H | 1.04752800  | -0.00017800 | 4.75756200  |
| B | 2.79228600  | -0.00047400 | 0.31472900  |
| H | 3.31337800  | -0.00030200 | 3.19179800  |
| H | -1.00182900 | -0.00020500 | 2.92054500  |
| H | 4.08763400  | 2.46680800  | -0.65039900 |
| H | -0.06145100 | 2.87244100  | -1.82041700 |
| H | 4.08616600  | -2.46886300 | -0.65018100 |
| H | -0.06304900 | -2.87127300 | -1.82093100 |

<sup>51</sup>Tp, -2431.99348412

|    |             |             |             |
|----|-------------|-------------|-------------|
| Co | 0.18153000  | 0.00812800  | 0.23010600  |
| C  | 4.08610500  | 0.01746000  | 0.09926400  |
| C  | 4.48117500  | -0.65405900 | -1.23956800 |
| H  | 4.11785300  | -0.07721900 | -2.09630200 |
| H  | 5.57176800  | -0.70355700 | -1.30466400 |
| H  | 4.08296900  | -1.66969700 | -1.30378100 |
| C  | 4.64247800  | 1.44695300  | 0.17582300  |
| H  | 4.28511400  | 2.05895000  | -0.65640500 |
| H  | 4.35118400  | 1.93889400  | 1.10784200  |
| H  | 5.73467500  | 1.41279700  | 0.13316600  |
| C  | 4.59402400  | -0.83792500 | 1.28360600  |
| H  | 4.32401200  | -0.38607900 | 2.24360700  |
| H  | 4.18455400  | -1.85015100 | 1.24514400  |
| H  | 5.68482400  | -0.90116000 | 1.23668600  |
| C  | 2.57632500  | 0.03323700  | 0.15618800  |
| O  | 1.89385600  | -1.05951700 | 0.16938200  |
| O  | 1.88523100  | 1.11484800  | 0.17434700  |
| H  | -3.98975000 | -0.02019400 | -0.49268300 |
| N  | -2.48168200 | -0.08269200 | 1.21353400  |
| C  | -3.29556700 | -0.15341000 | 2.27899100  |
| C  | -2.52217400 | -0.20178600 | 3.44275200  |
| C  | -1.20525800 | -0.15554900 | 2.99872800  |
| N  | -2.15610600 | 1.28104400  | -0.86584100 |
| C  | -2.66990100 | 2.36699600  | -1.46858200 |
| C  | -0.48806300 | 2.65774700  | -1.22390400 |
| C  | -1.63400100 | 3.27312600  | -1.72042300 |
| N  | -2.11442800 | -1.21407100 | -0.99514400 |
| C  | -2.59501000 | -2.25035200 | -1.70313800 |

|   |             |             |             |
|---|-------------|-------------|-------------|
| C | -1.53200100 | -3.09515100 | -2.04166800 |
| C | -0.40519800 | -2.49756400 | -1.48405600 |
| N | -0.76556300 | -1.36039700 | -0.85394300 |
| N | -0.81217600 | 1.45365800  | -0.70927900 |
| N | -1.18433600 | -0.08347900 | 1.64990200  |
| H | -1.58247200 | -4.01168800 | -2.60890200 |
| H | -1.71341700 | 4.23929400  | -2.19429300 |
| H | -2.87391100 | -0.26218400 | 4.46098400  |
| B | -2.81057300 | -0.00910500 | -0.31287700 |
| H | -4.36803800 | -0.16531600 | 2.14769900  |
| H | -0.28024300 | -0.17017100 | 3.55761100  |
| H | -3.65125300 | -2.32802000 | -1.91771900 |
| H | 0.63199500  | -2.79912300 | -1.48394000 |
| H | -3.72832500 | 2.43256200  | -1.67631100 |
| H | 0.53974200  | 2.98871400  | -1.19473500 |

<sup>12</sup>Tp, -2873.47534635

|    |             |             |             |
|----|-------------|-------------|-------------|
| Co | 0.54797000  | -0.02177100 | -0.05653900 |
| C  | 2.01708000  | 3.49202200  | -0.02795400 |
| C  | 0.98692400  | 4.30589900  | -0.85093500 |
| H  | -0.00708500 | 4.26292500  | -0.39439500 |
| H  | 1.30133700  | 5.35282700  | -0.88518700 |
| H  | 0.91812200  | 3.93245500  | -1.87620300 |
| C  | 2.11200300  | 4.03578500  | 1.40598200  |
| H  | 1.13864500  | 4.02169000  | 1.90300200  |
| H  | 2.80824200  | 3.44756900  | 2.01048300  |
| H  | 2.47032000  | 5.06855400  | 1.37903800  |
| C  | 3.39280200  | 3.52047400  | -0.72684200 |
| H  | 4.14197800  | 2.96421400  | -0.15342900 |
| H  | 3.33726200  | 3.09275800  | -1.73064600 |
| H  | 3.73674300  | 4.55543600  | -0.80711900 |
| C  | 1.51357900  | 2.07001200  | -0.01170000 |
| O  | 1.49494100  | 1.33434200  | -1.06439000 |
| O  | 1.03604200  | 1.50148100  | 1.03105300  |
| C  | -4.01140700 | 0.75282400  | 1.77191700  |
| C  | -2.80228100 | 1.14472300  | 1.21526700  |
| C  | -2.52486600 | 0.74204100  | -0.12103200 |
| C  | -3.58977800 | 0.21340000  | -0.92046100 |
| C  | -4.80132300 | -0.18665600 | -0.30174000 |
| C  | -4.98552000 | 0.03673800  | 1.04356100  |
| H  | -4.23689700 | 1.05461100  | 2.79112000  |
| C  | -3.43960300 | 0.23109000  | -2.33037800 |
| H  | -5.58756500 | -0.61958700 | -0.91279200 |
| H  | -5.90896000 | -0.26061200 | 1.52959500  |

|   |             |             |             |
|---|-------------|-------------|-------------|
| C | -2.30600800 | 0.77926900  | -2.88377800 |
| C | -1.23178600 | 1.07446300  | -2.02426800 |
| H | -4.24861700 | -0.13637500 | -2.95563800 |
| H | -2.18734900 | 0.90128400  | -3.95412300 |
| H | -0.26700600 | 1.35478100  | -2.42763400 |
| N | -1.27888900 | 0.95731000  | -0.69973500 |
| C | -1.93258500 | 2.15426700  | 1.92499400  |
| H | -2.12945600 | 2.16006100  | 3.00084600  |
| H | -0.86805000 | 2.01209500  | 1.75281000  |
| H | -2.18123800 | 3.15471900  | 1.54867700  |
| H | 1.02080100  | -4.23989000 | 0.42059300  |
| N | 2.19096700  | -2.27668000 | 0.53380900  |
| C | 3.43231300  | -2.68187300 | 0.86567700  |
| C | 4.25531200  | -1.56582900 | 0.96071900  |
| C | 3.42547800  | -0.47949900 | 0.66497900  |
| N | -0.15147800 | -2.48137900 | 1.26650500  |
| C | -0.59887200 | -3.01499500 | 2.42245000  |
| C | -0.79234100 | -0.81855400 | 2.51614300  |
| C | -1.03269100 | -1.98766900 | 3.24622800  |
| N | 0.44995400  | -2.69772100 | -1.15166400 |
| C | 0.54032500  | -3.43718100 | -2.27524100 |
| C | 0.53091900  | -2.58259900 | -3.36796400 |
| C | 0.45037300  | -1.30043400 | -2.81595900 |
| N | 0.37756100  | -1.37921000 | -1.47722700 |
| N | -0.28767200 | -1.12663100 | 1.31344500  |
| N | 2.18764100  | -0.92297900 | 0.41016700  |
| H | 0.57909400  | -2.84409900 | -4.41355500 |
| H | -1.45838900 | -2.06663400 | 4.23435700  |
| H | 5.30501500  | -1.54045900 | 1.20847500  |
| B | 0.86999300  | -3.06432200 | 0.27939000  |
| H | 3.64068600  | -3.73166300 | 1.00985600  |
| H | 3.65406800  | 0.57310100  | 0.62501900  |
| H | 0.61488400  | -4.51277700 | -2.21338900 |
| H | 0.45546800  | -0.35068200 | -3.32102300 |
| H | -0.56344500 | -4.08339900 | 2.57607200  |
| H | -0.93649400 | 0.20467300  | 2.80639000  |

<sup>32</sup>Tp, -2873.46225234

|    |             |            |            |
|----|-------------|------------|------------|
| Co | -0.79716100 | 0.31675400 | 0.03832100 |
| C  | 0.33687500  | 3.95125300 | 0.10460400 |
| C  | 1.40931300  | 4.01378600 | 1.22327900 |
| H  | 2.22969400  | 3.32088600 | 1.02063100 |
| H  | 1.80424200  | 5.03216400 | 1.27505100 |
| H  | 0.97558100  | 3.76156700 | 2.19459900 |

|   |             |             |             |
|---|-------------|-------------|-------------|
| C | 0.92246400  | 4.39503500  | -1.24488100 |
| H | 1.80972500  | 3.81632100  | -1.50775800 |
| H | 0.19285300  | 4.29051700  | -2.05277600 |
| H | 1.20976300  | 5.44790400  | -1.17818000 |
| C | -0.88231700 | 4.82378400  | 0.48853700  |
| H | -1.64801500 | 4.80349200  | -0.29387700 |
| H | -1.33124300 | 4.49053600  | 1.42721500  |
| H | -0.55241000 | 5.85912100  | 0.61005800  |
| C | -0.12469600 | 2.52609000  | 0.03372800  |
| O | -0.73800900 | 1.94989600  | 1.02001200  |
| O | 0.03095500  | 1.74502400  | -0.97433600 |
| C | 4.38667300  | -0.88994200 | -1.59415800 |
| C | 3.63417600  | 0.04152300  | -0.90180700 |
| C | 2.99612700  | -0.36992200 | 0.31168700  |
| C | 3.17484100  | -1.70872800 | 0.79073400  |
| C | 3.94944700  | -2.62756300 | 0.03620700  |
| C | 4.54012000  | -2.22169700 | -1.13755100 |
| H | 4.88023000  | -0.59041400 | -2.51459700 |
| C | 2.56243800  | -2.05836300 | 2.02119900  |
| H | 4.07447600  | -3.64193700 | 0.40412700  |
| H | 5.14032600  | -2.91673100 | -1.71645500 |
| C | 1.83270200  | -1.11779700 | 2.71011500  |
| C | 1.68820200  | 0.16834500  | 2.13975900  |
| H | 2.68894400  | -3.06494200 | 2.41082600  |
| H | 1.36339500  | -1.34708400 | 3.66064000  |
| H | 1.10473600  | 0.93093500  | 2.65176300  |
| N | 2.22007300  | 0.53552100  | 0.98430300  |
| C | 3.46234600  | 1.44951700  | -1.40530700 |
| H | 4.06099500  | 1.62151700  | -2.30282700 |
| H | 2.41263000  | 1.65025300  | -1.64101300 |
| H | 3.75908700  | 2.17703200  | -0.64364500 |
| H | -3.20674400 | -3.16110600 | -0.50715100 |
| N | -3.26169000 | -0.92092100 | -0.93677100 |
| C | -4.44442800 | -0.78821700 | -1.56833100 |
| C | -4.61969900 | 0.54980200  | -1.91283400 |
| C | -3.46829300 | 1.19058000  | -1.44804500 |
| N | -1.17776700 | -2.29104000 | -1.07416600 |
| C | -0.69384100 | -3.19848900 | -1.94318700 |
| C | 0.70314200  | -1.48342400 | -1.85264800 |
| C | 0.51200000  | -2.72861800 | -2.45554700 |
| N | -2.25158800 | -1.88974900 | 1.12764700  |
| C | -2.77945800 | -2.39553200 | 2.25759400  |
| C | -2.36429000 | -1.61512600 | 3.33425400  |
| C | -1.57420400 | -0.61158700 | 2.76995900  |



|   |             |             |             |
|---|-------------|-------------|-------------|
| N | -1.50455800 | -0.80094800 | 1.44161300  |
| N | -0.31707200 | -1.23918900 | -1.01350000 |
| N | -2.65529700 | 0.29932100  | -0.85939300 |
| H | -2.60358000 | -1.75362600 | 4.37719600  |
| H | 1.16277900  | -3.21805300 | -3.16303900 |
| H | -5.46044200 | 0.99050900  | -2.42580600 |
| B | -2.54703500 | -2.17687200 | -0.36597300 |
| H | -5.07855100 | -1.64759400 | -1.73095800 |
| H | -3.18194600 | 2.23100200  | -1.50379400 |
| H | -3.41817300 | -3.26565100 | 2.21858800  |
| H | -1.06397200 | 0.22098000  | 3.22821300  |
| H | -1.24269900 | -4.10708000 | -2.14282200 |
| H | 1.51073800  | -0.77709700 | -1.95669300 |

<sup>52</sup>Tp, -2873.46393555

|    |             |             |             |
|----|-------------|-------------|-------------|
| Co | -0.56723600 | 0.11275500  | 0.02588900  |
| C  | 2.35767800  | 2.85202700  | 0.06272100  |
| C  | 3.62995400  | 1.97881000  | 0.21873200  |
| H  | 3.72510800  | 1.26470700  | -0.60432400 |
| H  | 4.51215400  | 2.62589800  | 0.21912800  |
| H  | 3.61320300  | 1.42284800  | 1.16094900  |
| C  | 2.40288200  | 3.61249000  | -1.27497700 |
| H  | 2.48552300  | 2.92295200  | -2.11853700 |
| H  | 1.50390800  | 4.22138700  | -1.41424400 |
| H  | 3.26879600  | 4.28076300  | -1.28716700 |
| C  | 2.22994800  | 3.82270600  | 1.24805700  |
| H  | 1.32733000  | 4.43533400  | 1.16245000  |
| H  | 2.18675300  | 3.28451500  | 2.19808600  |
| H  | 3.09477600  | 4.49221200  | 1.26821500  |
| C  | 1.19467500  | 1.88002600  | 0.05549000  |
| O  | 0.55816700  | 1.56876800  | 1.11407000  |
| O  | 0.84189500  | 1.27004300  | -1.00949200 |
| C  | 3.61933900  | -1.57868500 | -2.03830400 |
| C  | 2.36644100  | -1.42160600 | -1.46703500 |
| C  | 2.28941300  | -1.37726700 | -0.03968100 |
| C  | 3.47784600  | -1.59233800 | 0.73986000  |
| C  | 4.73154100  | -1.73906400 | 0.09544100  |
| C  | 4.80080200  | -1.71147300 | -1.27652800 |
| H  | 3.69154900  | -1.61870300 | -3.12163400 |
| C  | 3.36301100  | -1.66943700 | 2.14912600  |
| H  | 5.62066300  | -1.88558800 | 0.70110200  |
| H  | 5.75421000  | -1.82367100 | -1.78241900 |
| C  | 2.13207700  | -1.54651700 | 2.75066300  |
| C  | 1.02266500  | -1.27489400 | 1.93292500  |

|   |             |             |             |
|---|-------------|-------------|-------------|
| H | 4.25772500  | -1.83942300 | 2.74158900  |
| H | 2.00448400  | -1.62529500 | 3.82398400  |
| H | 0.04461100  | -1.11453300 | 2.37853100  |
| N | 1.09153900  | -1.16048000 | 0.60985700  |
| C | 1.15814000  | -1.34699100 | -2.36780200 |
| H | 1.33132800  | -1.92928400 | -3.27633400 |
| H | 0.25904700  | -1.74244300 | -1.89390200 |
| H | 0.95239100  | -0.31605300 | -2.66191300 |
| H | -4.86257000 | -0.52049100 | -0.20667400 |
| N | -3.15478200 | 0.46772700  | -1.33290600 |
| C | -3.80058900 | 1.01982300  | -2.37434800 |
| C | -2.87013400 | 1.68190000  | -3.17739000 |
| C | -1.64595000 | 1.48592000  | -2.54160100 |
| N | -2.93260400 | -1.71783200 | -0.15818300 |
| C | -3.40347400 | -2.97711000 | -0.20898900 |
| C | -1.20235800 | -3.03228600 | -0.04992800 |
| C | -2.32428200 | -3.85584200 | -0.14571900 |
| N | -3.27807400 | 0.35984700  | 1.16421700  |
| C | -4.03232500 | 0.82884600  | 2.17410100  |
| C | -3.19594000 | 1.42933300  | 3.11510500  |
| C | -1.91098900 | 1.28999800  | 2.59178900  |
| N | -1.96748800 | 0.63654500  | 1.41420000  |
| N | -1.57493800 | -1.73647200 | -0.05908500 |
| N | -1.82489400 | 0.74821900  | -1.42604800 |
| H | -3.48474800 | 1.90415100  | 4.03997400  |
| H | -2.35279600 | -4.93427000 | -0.16611700 |
| H | -3.06247100 | 2.22782900  | -4.08799100 |
| B | -3.67923200 | -0.36775700 | -0.14171100 |
| H | -4.87054600 | 0.91006400  | -2.47648400 |
| H | -0.65527700 | 1.82752900  | -2.79763100 |
| H | -5.10595000 | 0.70973000  | 2.15639400  |
| H | -0.95817000 | 1.62811100  | 2.96799600  |
| H | -4.46515600 | -3.16279000 | -0.28273700 |
| H | -0.15838200 | -3.29465800 | 0.01804300  |

<sup>1</sup>TS4\_Tp, -3220.19990033, i463.61

|   |            |            |             |
|---|------------|------------|-------------|
| C | 1.64668700 | 4.59401500 | -0.02245200 |
| C | 2.25702000 | 4.24593800 | -1.20863400 |
| C | 2.09527300 | 2.93608300 | -1.72279400 |
| C | 1.31462200 | 1.99675100 | -0.98145400 |
| C | 0.63647400 | 2.37841200 | 0.20739200  |
| C | 0.82979800 | 3.67306100 | 0.66861000  |
| H | 3.25756100 | 3.19880800 | -3.53043100 |
| H | 1.77096800 | 5.59562900 | 0.37802200  |

|   |             |             |             |
|---|-------------|-------------|-------------|
| H | 2.86263700  | 4.95901100  | -1.75993600 |
| C | 2.66865400  | 2.50042900  | -2.94201400 |
| H | 0.31746800  | 3.98479800  | 1.57375500  |
| C | 1.74505600  | 0.32185500  | -2.55188700 |
| C | 2.47057500  | 1.20816400  | -3.36959100 |
| H | 1.61692100  | -0.71637100 | -2.82664200 |
| H | 2.88614300  | 0.84633800  | -4.30308200 |
| N | 1.21231000  | 0.69338800  | -1.40021800 |
| C | -0.27980900 | 1.45373200  | 0.91246900  |
| H | -0.82370600 | 0.64224100  | 0.39297200  |
| H | 0.02891700  | 1.18353500  | 1.91737800  |
| H | -1.41519200 | 1.95413800  | 1.01564200  |
| C | -3.44157900 | 1.24642900  | 0.86882800  |
| C | -4.96513600 | 1.43557500  | 0.63709600  |
| O | -2.77684600 | 2.34631100  | 0.99467200  |
| O | -2.95418300 | 0.10069000  | 0.90768700  |
| C | 3.08592100  | -0.12419600 | 0.88261700  |
| C | 3.85958900  | 0.20963200  | 2.18123700  |
| O | 1.82653400  | -0.38043200 | 1.11579700  |
| O | 3.64299900  | -0.13112800 | -0.21683600 |
| C | -5.64107900 | 0.07297100  | 0.43872400  |
| H | -6.71966500 | 0.19829600  | 0.28269600  |
| H | -5.21762100 | -0.44548200 | -0.42633600 |
| H | -5.48299100 | -0.56894500 | 1.30941900  |
| C | -5.55264800 | 2.15474800  | 1.86693200  |
| H | -5.43668300 | 1.54331400  | 2.76916400  |
| H | -5.03832400 | 3.10502100  | 2.03183100  |
| H | -6.62290100 | 2.35042000  | 1.72713600  |
| C | -5.15904700 | 2.31483200  | -0.61366100 |
| H | -4.74953700 | 1.82080500  | -1.50254700 |
| H | -6.22438600 | 2.50386400  | -0.79375100 |
| H | -4.64495000 | 3.27099600  | -0.48948800 |
| C | 3.75566600  | -0.99247100 | 3.14114900  |
| H | 4.20754200  | -1.88733100 | 2.69883400  |
| H | 4.28239500  | -0.77643700 | 4.07756100  |
| H | 2.71142300  | -1.21899500 | 3.37017000  |
| C | 5.32878000  | 0.49531300  | 1.84241500  |
| H | 5.88721500  | 0.72661200  | 2.75641800  |
| H | 5.79308200  | -0.36706500 | 1.35693100  |
| H | 5.41384000  | 1.34183400  | 1.15588600  |
| C | 3.21232600  | 1.45222800  | 2.82632700  |
| H | 3.22638600  | 2.30633900  | 2.14082100  |
| H | 2.17180000  | 1.25349900  | 3.09508500  |
| H | 3.75697700  | 1.73477600  | 3.73423200  |

|    |             |             |             |
|----|-------------|-------------|-------------|
| Co | 0.41117300  | -0.54906500 | -0.12654200 |
| H  | -1.94076600 | -4.02476100 | -0.89523100 |
| N  | -1.82846900 | -1.81349900 | -1.43345100 |
| C  | -2.90926300 | -1.62343100 | -2.21285200 |
| C  | -2.92875300 | -0.29439000 | -2.62019600 |
| C  | -1.80050600 | 0.27878700  | -2.02296000 |
| N  | 0.18936300  | -3.22562100 | -1.10924000 |
| C  | 0.85339800  | -4.31643800 | -1.54045600 |
| C  | 2.30107600  | -2.67233200 | -1.21059200 |
| C  | 2.20528500  | -4.00730400 | -1.62772000 |
| N  | -1.25528900 | -2.68190200 | 0.81757000  |
| C  | -1.81356300 | -3.24527400 | 1.90738100  |
| C  | -1.36560500 | -2.56349900 | 3.03111000  |
| C  | -0.51511700 | -1.56791100 | 2.53237800  |
| N  | -0.46591200 | -1.65378000 | 1.20199700  |
| N  | 1.07763700  | -2.21433300 | -0.91152400 |
| N  | -1.14731700 | -0.65218800 | -1.31692800 |
| H  | -1.62269000 | -2.75266600 | 4.06164100  |
| H  | 3.00912000  | -4.65437200 | -1.94343600 |
| H  | -3.66255700 | 0.19362200  | -3.24205100 |
| B  | -1.29296000 | -3.04225800 | -0.67777500 |
| H  | -3.58148700 | -2.44186000 | -2.42206700 |
| H  | -1.44903000 | 1.29941200  | -2.03367800 |
| H  | -2.48027000 | -4.08809300 | 1.80361200  |
| H  | 0.06263600  | -0.81414900 | 3.04196000  |
| H  | 0.31641400  | -5.22965400 | -1.75041700 |
| H  | 3.14759100  | -2.00929800 | -1.09897900 |

<sup>3</sup>TS4\_Tp, -3220.1919531, *i*259.59

|   |            |             |             |
|---|------------|-------------|-------------|
| C | 3.77556700 | 3.92039700  | -0.53452300 |
| C | 4.06245400 | 3.09282500  | -1.59467400 |
| C | 3.24694600 | 1.96382200  | -1.86654100 |
| C | 2.13161300 | 1.64567800  | -1.02077000 |
| C | 1.84310000 | 2.52493600  | 0.08665500  |
| C | 2.66182200 | 3.64020000  | 0.27425500  |
| H | 4.36251200 | 1.38632500  | -3.62735100 |
| H | 4.39276600 | 4.78812100  | -0.32473200 |
| H | 4.90623100 | 3.29339100  | -2.24884700 |
| C | 3.51177300 | 1.15135500  | -2.99355800 |
| H | 2.42797500 | 4.30906600  | 1.09709000  |
| C | 1.62269900 | -0.17070000 | -2.39269600 |
| C | 2.68295900 | 0.09546800  | -3.27315700 |
| H | 0.98005500 | -1.02420700 | -2.56293300 |
| H | 2.83580500 | -0.54778400 | -4.13222200 |

|    |             |             |             |
|----|-------------|-------------|-------------|
| N  | 1.35832500  | 0.54146100  | -1.30064300 |
| C  | 0.71801300  | 2.33913500  | 1.01807700  |
| H  | 0.62995000  | 1.33786200  | 1.43437200  |
| H  | 0.70650000  | 3.07525800  | 1.82182300  |
| H  | -0.30874000 | 2.50388800  | 0.45857200  |
| C  | -2.42646100 | 2.34763800  | 1.04187000  |
| C  | -3.96177000 | 2.31020000  | 0.69487200  |
| O  | -1.70202900 | 2.69832800  | 0.01564600  |
| O  | -2.03055900 | 2.03803900  | 2.15609800  |
| C  | 2.52207800  | -0.90389500 | 1.19850800  |
| C  | 3.26126800  | -0.89687200 | 2.55799000  |
| O  | 1.25995800  | -0.59803500 | 1.30816200  |
| O  | 3.11341300  | -1.17695800 | 0.14926900  |
| C  | -4.31830100 | 0.81281600  | 0.61922700  |
| H  | -5.39385000 | 0.70562400  | 0.43497100  |
| H  | -3.78259400 | 0.32118600  | -0.19533000 |
| H  | -4.06661800 | 0.30307200  | 1.55165800  |
| C  | -4.69717200 | 2.98264200  | 1.86569000  |
| H  | -4.42634100 | 2.50991500  | 2.81154900  |
| H  | -4.45180200 | 4.04810900  | 1.92994600  |
| H  | -5.77918100 | 2.89340900  | 1.71566800  |
| C  | -4.29595200 | 3.00926900  | -0.62987400 |
| H  | -3.80234200 | 2.51771100  | -1.47090200 |
| H  | -5.37851700 | 2.97313400  | -0.79669500 |
| H  | -3.98765600 | 4.05883200  | -0.61576600 |
| C  | 2.59919800  | -1.94655500 | 3.47329100  |
| H  | 2.68681200  | -2.95019300 | 3.04248400  |
| H  | 3.08347300  | -1.95664500 | 4.45685700  |
| H  | 1.53668100  | -1.72753900 | 3.60507000  |
| C  | 4.74298400  | -1.23342200 | 2.34559800  |
| H  | 5.27139600  | -1.24419800 | 3.30594200  |
| H  | 4.85555400  | -2.21185400 | 1.87158000  |
| H  | 5.22071400  | -0.49848300 | 1.69152000  |
| C  | 3.12063400  | 0.50378900  | 3.18805600  |
| H  | 3.53912500  | 1.27494600  | 2.53073000  |
| H  | 2.07010900  | 0.74486200  | 3.36851400  |
| H  | 3.65610700  | 0.54774500  | 4.14350200  |
| Co | 0.01745300  | -0.44811300 | -0.12956400 |
| H  | -3.17030900 | -3.18893000 | -1.12678200 |
| N  | -2.28362100 | -1.18151600 | -1.71240900 |
| C  | -3.10597700 | -0.82831600 | -2.72116700 |
| C  | -2.73156300 | 0.43116200  | -3.17457600 |
| C  | -1.64207000 | 0.78817800  | -2.36670400 |
| N  | -0.89856600 | -3.18308700 | -1.10974100 |

|   |             |             |             |
|---|-------------|-------------|-------------|
| C | -0.62796400 | -4.47891600 | -1.38848200 |
| C | 1.25735600  | -3.37858700 | -1.03265100 |
| C | 0.74836000  | -4.65007300 | -1.35641000 |
| N | -2.28687700 | -2.03835000 | 0.62337200  |
| C | -3.06786500 | -2.44226200 | 1.64809600  |
| C | -2.62467500 | -1.82017800 | 2.80835800  |
| C | -1.53468200 | -1.03512600 | 2.39896800  |
| N | -1.34472400 | -1.17702800 | 1.08564300  |
| N | 0.25818400  | -2.50238300 | -0.88853600 |
| N | -1.38093700 | -0.18944900 | -1.49065400 |
| H | -3.03307700 | -1.91376100 | 3.80282500  |
| H | 1.30163700  | -5.55965700 | -1.53620100 |
| H | -3.18594300 | 1.00958300  | -3.96418600 |
| B | -2.24273700 | -2.47582100 | -0.85796900 |
| H | -3.89559400 | -1.49336300 | -3.03757100 |
| H | -1.05757100 | 1.69408100  | -2.34640200 |
| H | -3.87568200 | -3.13810700 | 1.47631900  |
| H | -0.89212700 | -0.37537600 | 2.95934600  |
| H | -1.42918500 | -5.17693400 | -1.58397400 |
| H | 2.27117800  | -3.03709500 | -0.87735400 |

<sup>15</sup>Tp, -3220.2510703

|   |             |             |             |
|---|-------------|-------------|-------------|
| C | -3.16899100 | 2.43063500  | 0.76227800  |
| C | -3.17939600 | 2.40263100  | -0.61727000 |
| C | -2.22081800 | 1.62130900  | -1.31407600 |
| C | -1.27207800 | 0.89940600  | -0.54472900 |
| C | -1.30610200 | 0.86635000  | 0.87084100  |
| C | -2.24504900 | 1.65385600  | 1.50835900  |
| H | -2.84695700 | 2.03291500  | -3.34908000 |
| H | -3.88889500 | 3.04697800  | 1.29314800  |
| H | -3.90319700 | 2.98360900  | -1.18169000 |
| C | -2.13129400 | 1.50762400  | -2.72232100 |
| H | -2.29095100 | 1.66619000  | 2.59345600  |
| C | -0.19106600 | 0.10861300  | -2.44191900 |
| C | -1.13860500 | 0.73266700  | -3.27996000 |
| H | 0.64746200  | -0.44545300 | -2.84467700 |
| H | -1.04574800 | 0.62139900  | -4.35446600 |
| N | -0.25017700 | 0.20381500  | -1.12637200 |
| C | -0.31436500 | -0.06149400 | 1.50169800  |
| H | -0.74915200 | -1.05065400 | 1.70749000  |
| H | 0.08520700  | 0.33993600  | 2.43510800  |
| H | -2.81300000 | -1.32699000 | 1.76347600  |
| C | -4.17044500 | -1.11164100 | 0.47704000  |
| C | -5.66710900 | -0.84353300 | 0.32762000  |

|    |             |             |             |
|----|-------------|-------------|-------------|
| O  | -3.77638400 | -1.19188900 | 1.76557400  |
| O  | -3.40255200 | -1.28668900 | -0.45011400 |
| C  | 1.57001100  | 2.51585000  | -0.23020000 |
| C  | 1.84586200  | 3.83752600  | 0.53217000  |
| O  | 1.58613100  | 1.48223200  | 0.55869100  |
| O  | 1.35600300  | 2.51613900  | -1.44648500 |
| C  | -5.93839600 | -0.36669500 | -1.10734700 |
| H  | -7.01257200 | -0.21177700 | -1.25033400 |
| H  | -5.42057200 | 0.57664000  | -1.30446800 |
| H  | -5.58600800 | -1.09880300 | -1.83733300 |
| C  | -6.38664800 | -2.18766400 | 0.59235800  |
| H  | -6.06447600 | -2.95332300 | -0.12078000 |
| H  | -6.18501900 | -2.54870100 | 1.60503200  |
| H  | -7.46776500 | -2.05308800 | 0.48288500  |
| C  | -6.14057700 | 0.21222900  | 1.34447000  |
| H  | -5.62095100 | 1.16161600  | 1.18909800  |
| H  | -7.21487600 | 0.38376000  | 1.21969200  |
| H  | -5.95775900 | -0.11263300 | 2.37105100  |
| C  | 3.22579000  | 3.73742600  | 1.21153200  |
| H  | 4.01913700  | 3.60552000  | 0.46720200  |
| H  | 3.44165100  | 4.65194800  | 1.77659000  |
| H  | 3.26087400  | 2.88524600  | 1.89469300  |
| C  | 1.82201200  | 5.01639700  | -0.44956200 |
| H  | 2.01848800  | 5.95572600  | 0.08049600  |
| H  | 2.57725400  | 4.88944300  | -1.22976300 |
| H  | 0.85089400  | 5.08971900  | -0.94636800 |
| C  | 0.74878600  | 4.01542500  | 1.60132500  |
| H  | -0.24434400 | 4.06235000  | 1.14119500  |
| H  | 0.75303800  | 3.17583100  | 2.30110000  |
| H  | 0.90860500  | 4.94343400  | 2.16303700  |
| Co | 1.11325400  | -0.32787400 | 0.16698100  |
| H  | 3.84981500  | -3.65085300 | 0.02617200  |
| N  | 1.63417900  | -3.15872100 | -0.13383200 |
| C  | 1.09683000  | -4.36924800 | -0.39142300 |
| C  | -0.27372400 | -4.21381800 | -0.55123100 |
| C  | -0.50348900 | -2.84039900 | -0.37512500 |
| N  | 3.41810600  | -1.71244900 | -1.09196900 |
| C  | 4.44056900  | -1.66451900 | -1.97369300 |
| C  | 3.20879200  | 0.16435900  | -2.16382900 |
| C  | 4.34294600  | -0.47936900 | -2.68895700 |
| N  | 3.19293100  | -1.93243500 | 1.36969700  |
| C  | 4.06510800  | -2.02254500 | 2.39676500  |
| C  | 3.84114500  | -0.95527500 | 3.25633200  |
| C  | 2.79334300  | -0.23339700 | 2.66325900  |

|   |             |             |             |
|---|-------------|-------------|-------------|
| N | 2.41224500  | -0.83701700 | 1.53568000  |
| N | 2.65790700  | -0.59104600 | -1.20660000 |
| N | 0.65576900  | -2.22012300 | -0.12225600 |
| H | 4.36106500  | -0.72911100 | 4.17458000  |
| H | 4.99765100  | -0.12820600 | -3.47212900 |
| H | -1.00312900 | -4.97982600 | -0.76568100 |
| B | 3.10099400  | -2.71405800 | 0.03883600  |
| H | 1.72749600  | -5.24434000 | -0.44350300 |
| H | -1.42523700 | -2.27777300 | -0.42463600 |
| H | 4.77834400  | -2.83245600 | 2.43581200  |
| H | 2.31422200  | 0.68660800  | 2.95852300  |
| H | 5.15715200  | -2.47137800 | -2.02374800 |
| H | 2.75887100  | 1.12062500  | -2.39202800 |

<sup>35</sup>Tp, -3220.22818968

|   |             |             |             |
|---|-------------|-------------|-------------|
| C | 3.20654600  | 2.41683600  | -0.97275900 |
| C | 3.34148900  | 2.35090900  | 0.39833400  |
| C | 2.45716000  | 1.54008400  | 1.15872100  |
| C | 1.45753000  | 0.80873600  | 0.46639700  |
| C | 1.36130600  | 0.82893100  | -0.95182900 |
| C | 2.21923800  | 1.65728600  | -1.65064800 |
| H | 3.23175100  | 1.96024300  | 3.14053600  |
| H | 3.87026000  | 3.05315400  | -1.55049300 |
| H | 4.10377900  | 2.93091600  | 0.91090800  |
| C | 2.47704700  | 1.42434800  | 2.57087900  |
| H | 2.15033300  | 1.71533500  | -2.73285900 |
| C | 0.53480400  | 0.01126000  | 2.43472400  |
| C | 1.53249300  | 0.64769100  | 3.20509800  |
| H | -0.27124600 | -0.54843300 | 2.89881400  |
| H | 1.51949000  | 0.54526000  | 4.28464100  |
| N | 0.49959400  | 0.09452700  | 1.11904200  |
| C | 0.35049000  | -0.07067900 | -1.55967300 |
| H | 0.64918900  | -1.12157000 | -1.60728300 |
| H | -0.07415900 | 0.28174000  | -2.49876200 |
| H | 2.89563200  | -1.34868900 | -2.09204600 |
| C | 4.07706200  | -1.35086300 | -0.63269200 |
| C | 5.54206100  | -1.14266000 | -0.25394400 |
| O | 3.84915200  | -1.21617400 | -1.95775800 |
| O | 3.19384800  | -1.65117300 | 0.14695000  |
| C | -1.30574600 | 2.66321700  | 0.23331700  |
| C | -1.51505000 | 4.04301700  | -0.44061300 |
| O | -1.47521400 | 1.66572900  | -0.58003000 |
| O | -0.99691500 | 2.58064900  | 1.42876200  |
| C | 5.62256100  | -0.87836200 | 1.25756100  |



|    |             |             |             |
|----|-------------|-------------|-------------|
| H  | 6.66912300  | -0.77277100 | 1.56044100  |
| H  | 5.08957600  | 0.04042400  | 1.51885700  |
| H  | 5.17083100  | -1.69604300 | 1.82347800  |
| C  | 6.28074500  | -2.45543700 | -0.60896000 |
| H  | 5.86102900  | -3.30411100 | -0.05939800 |
| H  | 6.21398800  | -2.66703700 | -1.68013700 |
| H  | 7.33843600  | -2.36469500 | -0.34088000 |
| C  | 6.15428400  | 0.03171400  | -1.04052200 |
| H  | 5.62196100  | 0.96251400  | -0.82708400 |
| H  | 7.20229800  | 0.15830900  | -0.74942800 |
| H  | 6.11281100  | -0.14509600 | -2.11757100 |
| C  | -2.93624400 | 4.09005900  | -1.03500800 |
| H  | -3.69231500 | 3.98393600  | -0.24893900 |
| H  | -3.10838500 | 5.04698000  | -1.54214200 |
| H  | -3.08044600 | 3.27893500  | -1.75300200 |
| C  | -1.33137200 | 5.16219200  | 0.59243500  |
| H  | -1.47826500 | 6.14200000  | 0.12276000  |
| H  | -2.04655500 | 5.05622900  | 1.41261600  |
| H  | -0.32961000 | 5.12774700  | 1.02900600  |
| C  | -0.47452400 | 4.18708300  | -1.56946400 |
| H  | 0.54519800  | 4.13687600  | -1.17211500 |
| H  | -0.58995900 | 3.38391400  | -2.30206900 |
| H  | -0.59435800 | 5.14975000  | -2.08070200 |
| Co | -1.16043900 | -0.24744000 | -0.17387100 |
| H  | -4.22968600 | -3.36431700 | 0.17199200  |
| N  | -1.97200800 | -3.13973500 | 0.16925700  |
| C  | -1.59250500 | -4.41777100 | 0.37702400  |
| C  | -0.20530600 | -4.45636000 | 0.44961300  |
| C  | 0.19702900  | -3.12301600 | 0.27435400  |
| N  | -3.51953500 | -1.46800400 | 1.19928700  |
| C  | -4.43774400 | -1.35425000 | 2.18384300  |
| C  | -3.02652400 | 0.34669400  | 2.29061800  |
| C  | -4.15941000 | -0.20566200 | 2.91225100  |
| N  | -3.50520900 | -1.78151000 | -1.28386200 |
| C  | -4.43581500 | -1.88633500 | -2.25679600 |
| C  | -4.17046400 | -0.92400900 | -3.22295900 |
| C  | -3.03312100 | -0.25272700 | -2.74620900 |
| N  | -2.64077800 | -0.77990300 | -1.58336200 |
| N  | -2.65094300 | -0.42548800 | 1.26460200  |
| N  | -0.87645300 | -2.34018200 | 0.10512400  |
| H  | -4.72156300 | -0.73434900 | -4.13146200 |
| H  | -4.69950100 | 0.17915200  | 3.76400700  |
| H  | 0.42093200  | -5.32095300 | 0.60961100  |
| B  | -3.38383800 | -2.51805100 | 0.07196600  |

|   |             |             |             |
|---|-------------|-------------|-------------|
| H | -2.33209400 | -5.20066900 | 0.46021700  |
| H | 1.18735900  | -2.68842000 | 0.26732200  |
| H | -5.21522000 | -2.63115000 | -2.19015600 |
| H | -2.49399200 | 0.58851800  | -3.15707500 |
| H | -5.21702500 | -2.09459000 | 2.29092800  |
| H | -2.46633100 | 1.25033500  | 2.48958300  |
